# Supplementary material for: Microplastic Contamination in Commercial Insect Meal: A Valid Analytical Method to Detect It
Source: Preprints.org preprint supplement (doi:10.20944/preprints202403.1235.v1), 2024-03-20
Supplement: Supplementary file 3 [file supplementary]

## Sheet:  RAMAN
			starting material			S11 H2O RT 10a 1X 3acc 50x _bk			S4 KOH RT 10a 1X 3acc 50x_bk			S9 H2O 4°C 10a 1X 3acc 50x			S1 KOH 4°C 10a 1X 3acc 50x
		1001.9	1.94413	0.0162011		1001.9	71.0535	350.592	1001.9	113.382	700.945	1001.9	211.315	1101.51	1001.9	47.2559	1400.34
		1003.65	6.65056	0.0554214		1003.65	110.406	350.92	1003.65	54.3739	700.453	1003.65	157.216	1101.12	1003.65	91.5006	1400.65
		1005.4	36.5633	0.304694		1005.4	118.145	350.985	1005.4	-21.0089	699.825	1005.4	144.937	1101.04	1005.4	29.6378	1400.21
		1007.15	-60.9658	-0.508048		1007.15	10.202	350.085	1007.15	-9.14211	699.924	1007.15	216.485	1101.55	1007.15	18.4609	1400.13
		1008.89	-39.4567	-0.328806		1008.89	110.112	350.918	1008.89	1.78176	700.015	1008.89	101.534	1100.73	1008.89	13.1836	1400.09
		1010.64	-8.13168	-0.067764		1010.64	42.437	350.354	1010.64	-23.3138	699.806	1010.64	96.9206	1100.69	1010.64	10.9731	1400.08
		1012.39	-6.21938	-0.0518281		1012.39	0.498171	350.004	1012.39	51.5199	700.429	1012.39	89.2181	1100.64	1012.39	44.0893	1400.31
		1014.14	-35.1431	-0.292859		1014.14	-4.50584	349.962	1014.14	94.5502	700.788	1014.14	46.1183	1100.33	1014.14	5.99914	1400.04
		1015.89	17.2463	0.14372		1015.89	61.0865	350.509	1015.89	112.758	700.94	1015.89	89.5482	1100.64	1015.89	-6.60349	1399.95
		1017.64	14.9686	0.124739		1017.64	14.9942	350.125	1017.64	-52.3539	699.564	1017.64	-7.65946	1099.95	1017.64	42.756	1400.31
		1019.38	39.3492	0.32791		1019.38	22.6674	350.189	1019.38	-62.8446	699.476	1019.38	-46.4194	1099.67	1019.38	-9.99208	1399.93
		1021.13	6.2219	0.0518492		1021.13	-57.5924	349.52	1021.13	33.6586	700.28	1021.13	-9.91453	1099.93	1021.13	100.238	1400.72
		1022.88	-24.1072	-0.200894		1022.88	2.88565	350.024	1022.88	-51.867	699.568	1022.88	-69.3314	1099.5	1022.88	-23.592	1399.83
		1024.62	-22.1601	-0.184668		1024.62	-3.555	349.97	1024.62	65.0435	700.542	1024.62	-54.9236	1099.61	1024.62	-57.402	1399.59
		1026.37	-35.6486	-0.297071		1026.37	-68.5455	349.429	1026.37	-22.624	699.811	1026.37	-108.469	1099.23	1026.37	29.7469	1400.21
		1028.11	0.014675	0.000122292		1028.11	-8.1704	349.932	1028.11	14.9955	700.125	1028.11	-58.7065	1099.58	1028.11	-78.0096	1399.44
		1029.86	-30.3148	-0.252624		1029.86	-68.1775	349.432	1029.86	-49.5858	699.587	1029.86	1.66663	1100.01	1029.86	-39.5269	1399.72
		1031.6	8.18948	0.0682457		1031.6	-12.6203	349.895	1031.6	21.0003	700.175	1031.6	-49.5537	1099.65	1031.6	-24.676	1399.82
		1033.35	55.1489	0.459574		1033.35	-21.3042	349.822	1033.35	-27.5085	699.771	1033.35	-152.064	1098.91	1033.35	-79.8581	1399.43
		1035.09	48.7304	0.406087		1035.09	-105.525	349.121	1035.09	-53.2486	699.556	1035.09	-83.8655	1099.4	1035.09	-22.4168	1399.84
		1036.83	-46.2408	-0.38534		1036.83	-43.226	349.64	1036.83	-59.0128	699.508	1036.83	-104.919	1099.25	1036.83	-18.1506	1399.87
		1038.57	82.315	0.685958		1038.57	-74.7659	349.377	1038.57	-36.3721	699.697	1038.57	-90.1856	1099.36	1038.57	-86.7935	1399.38
		1040.32	37.9525	0.316271		1040.32	-4.74589	349.96	1040.32	-35.9549	699.7	1040.32	16.5741	1100.12	1040.32	-65.2719	1399.53
		1042.06	37.1883	0.309903		1042.06	-4.69903	349.961	1042.06	-24.001	699.8	1042.06	-65.9044	1099.53	1042.06	1.47483	1400.01
		1043.8	49.098	0.40915		1043.8	-4.33456	349.964	1043.8	33.2551	700.277	1043.8	-69.0427	1099.51	1043.8	43.1237	1400.31
		1045.54	107.458	0.895482		1045.54	31.4997	350.262	1045.54	-3.50267	699.971	1045.54	-91.3425	1099.35	1045.54	20.2327	1400.14
		1047.28	123.628	1.03023		1047.28	47.9415	350.4	1047.28	-2.01238	699.983	1047.28	-108.887	1099.22	1047.28	94.641	1400.68
		1049.02	121.512	1.0126		1049.02	44.9598	350.375	1049.02	-12.9488	699.892	1049.02	-18.933	1099.86	1049.02	43.9583	1400.31
		1050.76	206.71	1.72258		1050.76	102.797	350.857	1050.76	112.937	700.941	1050.76	3.95776	1100.03	1050.76	111.709	1400.8
		1052.5	2106.04	17.5503		1052.5	222.893	351.857	1052.5	160.232	701.335	1052.5	80.849	1100.58	1052.5	83.8809	1400.6
		1054.24	2718.6	22.655		1054.24	392.599	353.272	1054.24	326.106	702.718	1054.24	308.96	1102.21	1054.24	229.48	1401.64
		1055.98	4364.26	36.3689		1055.98	655.628	355.464	1055.98	576.821	704.807	1055.98	467.156	1103.34	1055.98	489.441	1403.5
		1057.72	3135.55	26.1296		1057.72	1269.93	360.583	1057.72	936.364	707.803	1057.72	1065.54	1107.61	1057.72	1028.71	1407.35
		1059.46	2095.21	17.4601		1059.46	2152.56	367.938	1059.46	1809.39	715.078	1059.46	1908.46	1113.63	1059.46	1765.73	1412.61
		1061.2	2802.79	23.3566		1061.2	3307.93	377.566	1061.2	2681.59	722.347	1061.2	2852.24	1120.37	1061.2	2718.93	1419.42
		1062.94	3136.97	26.1414		1062.94	3854.76	382.123	1062.94	3609.35	730.078	1062.94	3322.92	1123.74	1062.94	3307.42	1423.62
		1064.67	2754.72	22.956		1064.67	3461.17	378.843	1064.67	3393.71	728.281	1064.67	2915.36	1120.82	1064.67	3220.64	1423
		1066.41	1764.24	14.702		1066.41	2431.31	370.261	1066.41	2438.87	720.324	1066.41	1992.98	1114.24	1066.41	2438.39	1417.42
		1068.15	1051.33	8.76111		1068.15	1460.47	362.171	1068.15	1489.44	712.412	1068.15	1049.35	1107.5	1068.15	1351.12	1409.65
		1069.88	700.883	5.84069		1069.88	804.147	356.701	1069.88	840.407	707.003	1069.88	571.408	1104.08	1069.88	816.815	1405.83
		1071.62	466.057	3.88381		1071.62	454.078	353.784	1071.62	511.737	704.264	1071.62	322.246	1102.3	1071.62	553.459	1403.95
		1073.35	424.596	3.5383		1073.35	471.174	353.926	1073.35	392.077	703.267	1073.35	167.858	1101.2	1073.35	441.207	1403.15
		1075.09	400.073	3.33395		1075.09	400.869	353.341	1075.09	371.384	703.095	1075.09	143.597	1101.03	1075.09	436.36	1403.12
		1076.82	323.275	2.69396		1076.82	350.461	352.921	1076.82	362.122	703.018	1076.82	232.576	1101.66	1076.82	327.075	1402.34
		1078.56	326.994	2.72495		1078.56	417.462	353.479	1078.56	259.746	702.165	1078.56	272.369	1101.95	1078.56	270.135	1401.93
		1080.29	363.23	3.02691		1080.29	421.04	353.509	1080.29	372.288	703.102	1080.29	199.332	1101.42	1080.29	353.194	1402.52
		1082.03	323.15	2.69291		1082.03	352.655	352.939	1082.03	336.574	702.805	1082.03	257.927	1101.84	1082.03	313.398	1402.24
		1083.76	336.79	2.80658		1083.76	356.484	352.971	1083.76	265.628	702.214	1083.76	207.868	1101.48	1083.76	303.376	1402.17
		1085.49	370.241	3.08534		1085.49	313.769	352.615	1085.49	299.423	702.495	1085.49	165.036	1101.18	1085.49	260.914	1401.86
		1087.22	255.188	2.12657		1087.22	266.909	352.224	1087.22	370.126	703.084	1087.22	174.689	1101.25	1087.22	310.464	1402.22
		1088.96	282.988	2.35823		1088.96	285.222	352.377	1088.96	149.517	701.246	1088.96	134.984	1100.96	1088.96	234.201	1401.67
		1090.69	327.786	2.73155		1090.69	231.479	351.929	1090.69	251.568	702.096	1090.69	268.051	1101.91	1090.69	210.344	1401.5
		1092.42	296.178	2.46815		1092.42	217.449	351.812	1092.42	140.041	701.167	1092.42	94.1646	1100.67	1092.42	146.928	1401.05
		1094.15	243.322	2.02768		1094.15	226.157	351.885	1094.15	144.647	701.205	1094.15	77.4724	1100.55	1094.15	172.744	1401.23
		1095.88	135.225	1.12688		1095.88	165.578	351.38	1095.88	173.427	701.445	1095.88	110.452	1100.79	1095.88	130.677	1400.93
		1097.61	140.396	1.16996		1097.61	66.8216	350.557	1097.61	52.1815	700.435	1097.61	-43.403	1099.69	1097.61	67.4192	1400.48
		1099.34	120.07	1.00058		1099.34	87.0981	350.726	1099.34	140.626	701.172	1099.34	29.4337	1100.21	1099.34	53.7757	1400.38
		1101.07	118.159	0.984659		1101.07	69.2023	350.577	1101.07	104.499	700.871	1101.07	79.7193	1100.57	1101.07	62.8589	1400.45
		1102.8	215.461	1.79551		1102.8	62.7123	350.523	1102.8	154.89	701.291	1102.8	29.4839	1100.21	1102.8	43.6641	1400.31
		1104.53	155.459	1.29549		1104.53	25.1006	350.209	1104.53	72.126	700.601	1104.53	68.605	1100.49	1104.53	23.0985	1400.16
		1106.26	156.401	1.30334		1106.26	112.308	350.936	1106.26	53.1992	700.443	1106.26	48.2573	1100.34	1106.26	79.1407	1400.57
		1107.98	127.565	1.06305		1107.98	134.376	351.12	1107.98	-9.63289	699.92	1107.98	-8.91396	1099.94	1107.98	142.347	1401.02
		1109.71	251.916	2.0993		1109.71	166.441	351.387	1109.71	107.719	700.898	1109.71	37.4891	1100.27	1109.71	65.2041	1400.47
		1111.44	248.632	2.07194		1111.44	136.145	351.135	1111.44	203.899	701.699	1111.44	129.356	1100.92	1111.44	183.861	1401.31
		1113.17	202.774	1.68978		1113.17	254.883	352.124	1113.17	195.16	701.626	1113.17	18.3694	1100.13	1113.17	278.482	1401.99
		1114.89	267.611	2.23009		1114.89	220.426	351.837	1114.89	287.248	702.394	1114.89	204.016	1101.46	1114.89	339.122	1402.42
		1116.62	394.946	3.29122		1116.62	275.436	352.295	1116.62	264.435	702.204	1116.62	247.799	1101.77	1116.62	286.254	1402.04
		1118.34	447.074	3.72561		1118.34	400.083	353.334	1118.34	504.35	704.203	1118.34	298.718	1102.13	1118.34	392.43	1402.8
		1120.07	595.807	4.96506		1120.07	536.181	354.468	1120.07	491.603	704.097	1120.07	480.338	1103.43	1120.07	473.122	1403.38
		1121.79	788.642	6.57201		1121.79	720.667	356.006	1121.79	694.82	705.79	1121.79	657.781	1104.7	1121.79	755.601	1405.4
		1123.52	1166.28	9.71896		1123.52	1237.75	360.315	1123.52	1159.6	709.663	1123.52	946.131	1106.76	1123.52	1090.8	1407.79
		1125.24	1903.63	15.8636		1125.24	1976.78	366.473	1125.24	1906.02	715.883	1125.24	1653.85	1111.81	1125.24	1927.85	1413.77
		1126.97	3111.83	25.9319		1126.97	3345.88	377.882	1126.97	3244.13	727.034	1126.97	3071.2	1121.94	1126.97	3102.18	1422.16
		1128.69	4351.82	36.2651		1128.69	4778.14	389.818	1128.69	4732.13	739.434	1128.69	4436.54	1131.69	1128.69	4666.61	1433.33
		1130.41	4660.85	38.8404		1130.41	5222.66	393.522	1130.41	5208.25	743.402	1130.41	4627.78	1133.06	1130.41	5001.59	1435.73
		1132.14	3705.49	30.8791		1132.14	4007.42	383.395	1132.14	4252.23	735.435	1132.14	3876.02	1127.69	1132.14	4036.65	1428.83
		1133.86	2389.77	19.9147		1133.86	2710.58	372.588	1133.86	2696.85	722.474	1133.86	2432.46	1117.37	1133.86	2631.68	1418.8
		1135.58	1296.9	10.8075		1135.58	1542.68	362.856	1135.58	1633.19	713.61	1135.58	1329.79	1109.5	1135.58	1330.02	1409.5
		1137.3	758.654	6.32212		1137.3	829.755	356.915	1137.3	761.238	706.344	1137.3	646.492	1104.62	1137.3	822.012	1405.87
		1139.02	513.45	4.27875		1139.02	573.514	354.779	1139.02	439.875	703.666	1139.02	432.667	1103.09	1139.02	410.61	1402.93
		1140.74	342.183	2.85152		1140.74	308.619	352.572	1140.74	398.903	703.324	1140.74	318.386	1102.27	1140.74	417.676	1402.98
		1142.46	254.87	2.12392		1142.46	272.911	352.274	1142.46	110.102	700.918	1142.46	222.529	1101.59	1142.46	185.476	1401.32
		1144.19	197.433	1.64528		1144.19	147.437	351.229	1144.19	180.171	701.501	1144.19	68.1791	1100.49	1144.19	228.117	1401.63
		1145.9	134.272	1.11893		1145.9	148.717	351.239	1145.9	129.165	701.076	1145.9	91.8229	1100.66	1145.9	136.843	1400.98
		1147.62	153.736	1.28113		1147.62	117.207	350.977	1147.62	83.8365	700.699	1147.62	-4.28901	1099.97	1147.62	109.658	1400.78
		1149.34	137.571	1.14643		1149.34	69.9955	350.583	1149.34	55.5984	700.463	1149.34	71.9873	1100.51	1149.34	11.1883	1400.08
		1151.06	8.75999	0.073		1151.06	32.7315	350.273	1151.06	17.3663	700.145	1151.06	22.7726	1100.16	1151.06	-13.1877	1399.91
		1152.78	90.9486	0.757905		1152.78	26.811	350.223	1152.78	-16.6074	699.862	1152.78	61.8959	1100.44	1152.78	-0.502336	1400
		1154.5	147.496	1.22913		1154.5	133.558	351.113	1154.5	77.7773	700.648	1154.5	-25.9703	1099.81	1154.5	30.7283	1400.22
		1156.22	161.26	1.34384		1156.22	56.2889	350.469	1156.22	83.7374	700.698	1156.22	41.5711	1100.3	1156.22	36.2785	1400.26
		1157.93	137.927	1.14939		1157.93	50.3196	350.419	1157.93	75.4256	700.629	1157.93	-29.3384	1099.79	1157.93	-6.69238	1399.95
		1159.65	81.7513	0.681261		1159.65	111.41	350.928	1159.65	61.3911	700.512	1159.65	46.6679	1100.33	1159.65	45.9353	1400.33
		1161.37	116.913	0.974275		1161.37	52.5855	350.438	1161.37	80.1738	700.668	1161.37	58.3982	1100.42	1161.37	48.6068	1400.35
		1163.08	132.094	1.10078		1163.08	100.806	350.84	1163.08	123.226	701.027	1163.08	31.5117	1100.23	1163.08	28.4188	1400.2
		1164.8	251.539	2.09616		1164.8	268.994	352.242	1164.8	123.44	701.029	1164.8	204.496	1101.46	1164.8	179.596	1401.28
		1166.51	459.597	3.82997		1166.51	372.945	353.108	1166.51	289.345	702.411	1166.51	381.769	1102.73	1166.51	389.391	1402.78
		1168.23	669.165	5.57637		1168.23	711.237	355.927	1168.23	598.183	704.985	1168.23	604.767	1104.32	1168.23	592.109	1404.23
		1169.95	748.769	6.23974		1169.95	823.847	356.865	1169.95	645.608	705.38	1169.95	774.912	1105.54	1169.95	700.578	1405
		1171.66	716.909	5.97424		1171.66	744.934	356.208	1171.66	617.279	705.144	1171.66	639.161	1104.57	1171.66	631.828	1404.51
		1173.37	536.335	4.46946		1173.37	354.273	352.952	1173.37	431.641	703.597	1173.37	450.375	1103.22	1173.37	438.636	1403.13
		1175.09	292.758	2.43965		1175.09	239.414	351.995	1175.09	225.886	701.882	1175.09	237.125	1101.69	1175.09	235.335	1401.68
		1176.8	173.512	1.44593		1176.8	153.081	351.276	1176.8	68.6521	700.572	1176.8	125.264	1100.89	1176.8	174.959	1401.25
		1178.51	79.96	0.666333		1178.51	26.62	350.222	1178.51	97.3115	700.811	1178.51	-3.88817	1099.97	1178.51	53.0163	1400.38
		1180.22	19.2744	0.16062		1180.22	40.3051	350.336	1180.22	-2.82778	699.976	1180.22	52.8528	1100.38	1180.22	-4.60999	1399.97
		1181.94	38.7075	0.322562		1181.94	89.7432	350.748	1181.94	-25.7473	699.785	1181.94	17.9409	1100.13	1181.94	-85.1861	1399.39
		1183.65	10.9037	0.0908644		1183.65	-26.8917	349.776	1183.65	-101.667	699.153	1183.65	4.41423	1100.03	1183.65	-26.9554	1399.81
		1185.36	-16.9182	-0.140985		1185.36	-61.9948	349.483	1185.36	-23.0045	699.808	1185.36	-75.0608	1099.46	1185.36	-120.505	1399.14
		1187.07	29.7122	0.247601		1187.07	-19.8151	349.835	1187.07	-149.143	698.757	1187.07	-30.0502	1099.79	1187.07	36.5052	1400.26
		1188.78	3.3049	0.0275408		1188.78	-76.4889	349.363	1188.78	24.0346	700.2	1188.78	-42.3897	1099.7	1188.78	0.178886	1400
		1190.49	25.592	0.213267		1190.49	48.7368	350.406	1190.49	33.9135	700.283	1190.49	21.1236	1100.15	1190.49	-67.7177	1399.52
		1192.2	75.1111	0.625926		1192.2	-131.272	348.906	1192.2	-36.4875	699.696	1192.2	-18.5953	1099.87	1192.2	-2.39407	1399.98
		1193.91	-47.3605	-0.394671		1193.91	-146.55	348.779	1193.91	90.8648	700.757	1193.91	-110.006	1099.21	1193.91	2.73014	1400.02
		1195.62	-26.5202	-0.221001		1195.62	-74.4175	349.38	1195.62	30.4238	700.254	1195.62	-101.172	1099.28	1195.62	-29.4498	1399.79
		1197.33	-58.736	-0.489467		1197.33	75.1438	350.626	1197.33	-47.2832	699.606	1197.33	-3.50046	1099.97	1197.33	25.8009	1400.18
		1199.04	-16.3874	-0.136562		1199.04	-72.1748	349.399	1199.04	-102.107	699.149	1199.04	-113.839	1099.19	1199.04	-29.3983	1399.79
		1200.75	-61.5366	-0.512805		1200.75	-8.70176	349.927	1200.75	-55.1244	699.541	1200.75	-9.10057	1099.93	1200.75	-84.6472	1399.4
		1202.46	22.4293	0.186911		1202.46	-85.8684	349.284	1202.46	-46.903	699.609	1202.46	74.0802	1100.53	1202.46	-79.689	1399.43
		1204.16	0.219963	0.00183302		1204.16	-69.8136	349.418	1204.16	-63.1065	699.474	1204.16	43.8436	1100.31	1204.16	-77.626	1399.45
		1205.87	-109.574	-0.913115		1205.87	-15.0322	349.875	1205.87	-89.4	699.255	1205.87	-13.7542	1099.9	1205.87	-36.8347	1399.74
		1207.58	-47.1187	-0.392656		1207.58	-10.5225	349.912	1207.58	-64.0488	699.466	1207.58	17.5743	1100.13	1207.58	16.8644	1400.12
		1209.28	28.2849	0.235707		1209.28	-26.1532	349.782	1209.28	-83.2379	699.306	1209.28	-4.28856	1099.97	1209.28	5.93149	1400.04
		1210.99	17.5235	0.146029		1210.99	45.7895	350.382	1210.99	-43.5804	699.637	1210.99	-102.369	1099.27	1210.99	-25.1546	1399.82
		1212.69	-33.4756	-0.278963		1212.69	7.09539	350.059	1212.69	-121.752	698.985	1212.69	-43.9472	1099.69	1212.69	-74.9598	1399.46
		1214.4	13.2184	0.110153		1214.4	-24.4703	349.796	1214.4	-43.3505	699.639	1214.4	10.1188	1100.07	1214.4	10.2657	1400.07
		1216.1	-40.6909	-0.339091		1216.1	41.6526	350.347	1216.1	47.9848	700.4	1216.1	18.1435	1100.13	1216.1	-12.3099	1399.91
		1217.81	-34.2465	-0.285387		1217.81	-25.9416	349.784	1217.81	-31.7623	699.735	1217.81	-73.0959	1099.48	1217.81	-40.6791	1399.71
		1219.51	-3.35643	-0.0279703		1219.51	-13.0729	349.891	1219.51	58.109	700.484	1219.51	-45.0818	1099.68	1219.51	-23.073	1399.84
		1221.21	-11.2937	-0.0941143		1221.21	-52.0173	349.567	1221.21	-53.3798	699.555	1221.21	-34.3807	1099.75	1221.21	36.2176	1400.26
		1222.92	52.6869	0.439057		1222.92	2.48721	350.021	1222.92	-21.0964	699.824	1222.92	75.5201	1100.54	1222.92	40.8272	1400.29
		1224.62	-28.6385	-0.238654		1224.62	-96.9843	349.192	1224.62	-62.2155	699.482	1224.62	-60.6447	1099.57	1224.62	32.4605	1400.23
		1226.32	-2.05982	-0.0171652		1226.32	46.6951	350.389	1226.32	54.9314	700.458	1226.32	29.0331	1100.21	1226.32	24.0619	1400.17
		1228.03	-31.6204	-0.263504		1228.03	13.3305	350.111	1228.03	-39.5239	699.671	1228.03	-6.55569	1099.95	1228.03	-47.7191	1399.66
		1229.73	91.4261	0.761884		1229.73	-50.3196	349.581	1229.73	9.93284	700.083	1229.73	41.2964	1100.29	1229.73	64.7403	1400.46
		1231.43	89.2272	0.74356		1231.43	14.1372	350.118	1231.43	72.3359	700.603	1231.43	-17.4606	1099.88	1231.43	43.281	1400.31
		1233.13	74.0578	0.617149		1233.13	-6.40359	349.947	1233.13	15.172	700.126	1233.13	5.80572	1100.04	1233.13	18.8981	1400.13
		1234.83	24.2983	0.202486		1234.83	23.4355	350.195	1234.83	-40.6111	699.662	1234.83	-57.4198	1099.59	1234.83	20.4049	1400.15
		1236.53	50.8885	0.424071		1236.53	87.8349	350.732	1236.53	53.4162	700.445	1236.53	-22.7351	1099.84	1236.53	23.32	1400.17
		1238.23	71.7222	0.597685		1238.23	23.9471	350.2	1238.23	14.8479	700.124	1238.23	27.7711	1100.2	1238.23	-17.0318	1399.88
		1239.93	60.8399	0.506999		1239.93	70.9995	350.592	1239.93	-32.4283	699.73	1239.93	78.2404	1100.56	1239.93	91.0528	1400.65
		1241.63	-23.5901	-0.196584		1241.63	-8.85451	349.926	1241.63	19.7427	700.165	1241.63	-54.4464	1099.61	1241.63	1.60502	1400.01
		1243.33	13.0915	0.109096		1243.33	81.4111	350.678	1243.33	109.4	700.912	1243.33	-45.8954	1099.67	1243.33	-66.279	1399.53
		1245.03	-20.9003	-0.174169		1245.03	44.7359	350.373	1245.03	-14.4376	699.88	1245.03	93.8922	1100.67	1245.03	-26.0235	1399.81
		1246.73	20.1165	0.167638		1246.73	35.4197	350.295	1246.73	1.59333	700.013	1246.73	-14.4937	1099.9	1246.73	22.8683	1400.16
		1248.43	14.9669	0.124724		1248.43	56.3769	350.47	1248.43	26.2618	700.219	1248.43	48.7761	1100.35	1248.43	123.711	1400.88
		1250.12	18.4687	0.153906		1250.12	49.8767	350.416	1250.12	79.7714	700.665	1250.12	84.5945	1100.6	1250.12	64.3277	1400.46
		1251.82	69.6171	0.580142		1251.82	106.873	350.891	1251.82	-5.33137	699.956	1251.82	71.3004	1100.51	1251.82	-112.055	1399.2
		1253.52	68.7977	0.573314		1253.52	23.7838	350.198	1253.52	71.2448	700.594	1253.52	27.6375	1100.2	1253.52	99.9333	1400.71
		1255.21	7.30422	0.0608685		1255.21	69.1761	350.576	1255.21	117.481	700.979	1255.21	111.019	1100.79	1255.21	-40.4679	1399.71
		1256.91	146.604	1.2217		1256.91	117.45	350.979	1256.91	82.8055	700.69	1256.91	123.61	1100.88	1256.91	71.8775	1400.51
		1258.61	25.8465	0.215388		1258.61	131.025	351.092	1258.61	43.7411	700.365	1258.61	127.491	1100.91	1258.61	49.8443	1400.36
		1260.3	55.3548	0.46129		1260.3	150.362	351.253	1260.3	149.17	701.243	1260.3	112.552	1100.8	1260.3	111.61	1400.8
		1262	157.156	1.30963		1262	210.154	351.751	1262	92.6982	700.772	1262	86.0061	1100.61	1262	76.5116	1400.55
		1263.69	105.727	0.881058		1263.69	223.675	351.864	1263.69	146.071	701.217	1263.69	140.395	1101	1263.69	113.675	1400.81
		1265.39	169.973	1.41644		1265.39	214.025	351.784	1265.39	189.306	701.578	1265.39	213.568	1101.53	1265.39	266.522	1401.9
		1267.08	140.218	1.16848		1267.08	246.299	352.052	1267.08	202.157	701.685	1267.08	211.524	1101.51	1267.08	222.676	1401.59
		1268.77	224.752	1.87294		1268.77	259.748	352.165	1268.77	241.028	702.009	1268.77	221.023	1101.58	1268.77	265.597	1401.9
		1270.47	154.47	1.28725		1270.47	232.652	351.939	1270.47	243.705	702.031	1270.47	271.019	1101.94	1270.47	155.106	1401.11
		1272.16	221.669	1.84724		1272.16	237.362	351.978	1272.16	242.013	702.017	1272.16	261.659	1101.87	1272.16	234.164	1401.67
		1273.85	209.264	1.74387		1273.85	324.573	352.705	1273.85	257.666	702.147	1273.85	294.255	1102.1	1273.85	206.091	1401.47
		1275.54	222.922	1.85768		1275.54	297.398	352.478	1275.54	193.656	701.614	1275.54	210.995	1101.51	1275.54	244.6	1401.75
		1277.24	240.928	2.00774		1277.24	299.153	352.493	1277.24	236.776	701.973	1277.24	195.751	1101.4	1277.24	246.89	1401.76
		1278.93	247.352	2.06127		1278.93	316.82	352.64	1278.93	258.157	702.151	1278.93	144.259	1101.03	1278.93	408.516	1402.92
		1280.62	311.738	2.59782		1280.62	382.288	353.186	1280.62	289.664	702.414	1280.62	252.118	1101.8	1280.62	348.482	1402.49
		1282.31	222.519	1.85433		1282.31	418.773	353.49	1282.31	322.608	702.688	1282.31	328.117	1102.34	1282.31	314.486	1402.25
		1284	378.258	3.15215		1284	449.456	353.745	1284	355.547	702.963	1284	364.993	1102.61	1284	365.989	1402.61
		1285.69	383.262	3.19385		1285.69	494.623	354.122	1285.69	452.268	703.769	1285.69	494.658	1103.53	1285.69	449.383	1403.21
		1287.38	530.399	4.41999		1287.38	825.498	356.879	1287.38	625.877	705.216	1287.38	654.824	1104.68	1287.38	606.76	1404.33
		1289.07	822.657	6.85547		1289.07	1088.31	359.069	1289.07	850.308	707.086	1289.07	906.428	1106.47	1289.07	875.878	1406.26
		1290.76	1772.3	14.7692		1290.76	2105.69	367.547	1290.76	1724.82	714.374	1290.76	1760.26	1112.57	1290.76	1654.36	1411.82
		1292.45	3492.93	29.1078		1292.45	4126.26	384.386	1292.45	3820.14	731.835	1292.45	3534.49	1125.25	1292.45	3737.78	1426.7
		1294.13	5667.18	47.2265		1294.13	6813.92	406.783	1294.13	6099.23	750.827	1294.13	6147	1143.91	1294.13	5859.81	1441.86
		1295.82	6078.37	50.6531		1295.82	7554.35	412.953	1295.82	6744.5	756.204	1295.82	6896.45	1149.26	1295.82	6816.9	1448.69
		1297.51	5195.89	43.2991		1297.51	5984.74	399.873	1297.51	5444.17	745.368	1297.51	5579.83	1139.86	1297.51	5172.16	1436.94
		1299.2	3149.64	26.247		1299.2	3723.08	381.026	1299.2	3350.25	727.919	1299.2	3382.48	1124.16	1299.2	3321.92	1423.73
		1300.88	1866.66	15.5555		1300.88	2244.92	368.708	1300.88	1981.78	716.515	1300.88	2023.86	1114.46	1300.88	2025.81	1414.47
		1302.57	1129.49	9.41244		1302.57	1515.91	362.633	1302.57	1327.63	711.064	1302.57	1276.4	1109.12	1302.57	1422.25	1410.16
		1304.26	819.299	6.82749		1304.26	1064.15	358.868	1304.26	1110.63	709.255	1304.26	1025.66	1107.33	1304.26	885.262	1406.32
		1305.94	747.38	6.22817		1305.94	913.1	357.609	1305.94	794.686	706.622	1305.94	722.488	1105.16	1305.94	833.564	1405.95
		1307.63	570.747	4.75622		1307.63	769.242	356.41	1307.63	728.672	706.072	1307.63	653.272	1104.67	1307.63	780.372	1405.57
		1309.31	591.824	4.93186		1309.31	799.823	356.665	1309.31	594.263	704.952	1309.31	552.028	1103.94	1309.31	664.607	1404.75
		1311	503.82	4.1985		1311	613.673	355.114	1311	507.789	704.232	1311	440.563	1103.15	1311	442.598	1403.16
		1312.68	536.539	4.47116		1312.68	501.631	354.18	1312.68	454.726	703.789	1312.68	413.435	1102.95	1312.68	511.46	1403.65
		1314.37	447.033	3.72528		1314.37	494.298	354.119	1314.37	436.544	703.638	1314.37	457.592	1103.27	1314.37	517.754	1403.7
		1316.05	324.018	2.70015		1316.05	433.1	353.609	1316.05	393.603	703.28	1316.05	346.034	1102.47	1316.05	483.289	1403.45
		1317.73	278.117	2.31764		1317.73	395.164	353.293	1317.73	337.535	702.813	1317.73	295.582	1102.11	1317.73	221.692	1401.58
		1319.42	204.529	1.70441		1319.42	306.229	352.552	1319.42	218.81	701.823	1319.42	192.683	1101.38	1319.42	283.227	1402.02
		1321.1	272.19	2.26825		1321.1	176.465	351.471	1321.1	216.538	701.804	1321.1	162.565	1101.16	1321.1	298.168	1402.13
		1322.78	217.518	1.81265		1322.78	145.701	351.214	1322.78	217.174	701.81	1322.78	168.864	1101.21	1322.78	129.558	1400.93
		1324.46	162.827	1.35689		1324.46	238.766	351.99	1324.46	219.256	701.827	1324.46	112.516	1100.8	1324.46	169.225	1401.21
		1326.14	105.202	0.876684		1326.14	168.633	351.405	1326.14	123.684	701.031	1326.14	2.22599	1100.02	1326.14	146.23	1401.04
		1327.83	69.4224	0.57852		1327.83	146.566	351.221	1327.83	89.2854	700.744	1327.83	101.803	1100.73	1327.83	117.382	1400.84
		1329.51	26.3454	0.219545		1329.51	44.2976	350.369	1329.51	72.3659	700.603	1329.51	55.6353	1100.4	1329.51	143.923	1401.03
		1331.19	-10.9122	-0.090935		1331.19	22.1848	350.185	1331.19	123.971	701.033	1331.19	108.621	1100.78	1331.19	34.841	1400.25
		1332.87	24.7472	0.206226		1332.87	40.8901	350.341	1332.87	-8.20315	699.932	1332.87	-62.9971	1099.55	1332.87	23.4231	1400.17
		1334.55	31.2515	0.260429		1334.55	-36.6861	349.694	1334.55	-22.2604	699.814	1334.55	7.50948	1100.05	1334.55	82.0263	1400.59
		1336.22	45.0631	0.375525		1336.22	-26.7415	349.777	1336.22	5.99467	700.05	1336.22	149.565	1101.07	1336.22	63.3127	1400.45
		1337.9	-47.6639	-0.397199		1337.9	146.664	351.222	1337.9	51.7628	700.431	1337.9	-7.52266	1099.95	1337.9	82.523	1400.59
		1339.58	-9.03428	-0.0752857		1339.58	96.7868	350.807	1339.58	81.4934	700.679	1339.58	-6.99523	1099.95	1339.58	11.2298	1400.08
		1341.26	-33.1728	-0.27644		1341.26	-20.2905	349.831	1341.26	-52.3137	699.564	1341.26	32.961	1100.24	1341.26	-17.7648	1399.87
		1342.94	23.0136	0.19178		1342.94	11.5525	350.096	1342.94	-21.1415	699.824	1342.94	-20.517	1099.85	1342.94	-55.5344	1399.6
		1344.62	-8.41657	-0.0701381		1344.62	22.9539	350.191	1344.62	91.8436	700.765	1344.62	32.6315	1100.23	1344.62	55.6719	1400.4
		1346.29	53.6591	0.447159		1346.29	37.2851	350.311	1346.29	64.6158	700.538	1346.29	-82.2028	1099.41	1346.29	6.20592	1400.04
		1347.97	-52.2961	-0.435801		1347.97	54.5356	350.454	1347.97	0.831779	700.007	1347.97	-50.9395	1099.64	1347.97	31.2364	1400.22
		1349.65	28.8123	0.240102		1349.65	105.416	350.878	1349.65	-5.96768	699.95	1349.65	-78.1104	1099.44	1349.65	9.50404	1400.07
		1351.32	-34.7811	-0.289842		1351.32	13.032	350.109	1351.32	-82.9559	699.309	1351.32	-65.8111	1099.53	1351.32	-37.1052	1399.73
		1353	6.89681	0.0574734		1353	22.9759	350.191	1353	34.5191	700.288	1353	-60.7962	1099.57	1353	34.7163	1400.25
		1354.67	-20.1414	-0.167845		1354.67	9.5265	350.079	1354.67	106.709	700.889	1354.67	-14.8035	1099.89	1354.67	14.425	1400.1
		1356.35	-16.4648	-0.137207		1356.35	-40.5099	349.662	1356.35	19.4604	700.162	1356.35	76.5688	1100.55	1356.35	1.4267	1400.01
		1358.02	42.828	0.3569		1358.02	118.684	350.989	1358.02	-51.721	699.569	1358.02	-55.8755	1099.6	1358.02	93.7811	1400.67
		1359.7	45.0717	0.375597		1359.7	68.6482	350.572	1359.7	162.456	701.354	1359.7	66.2938	1100.47	1359.7	-31.9092	1399.77
		1361.37	89.7796	0.748163		1361.37	-54.596	349.545	1361.37	41.5055	700.346	1361.37	74.3562	1100.53	1361.37	9.23331	1400.07
		1363.05	144.764	1.20637		1363.05	117.873	350.982	1363.05	153.311	701.278	1363.05	142.471	1101.02	1363.05	50.3892	1400.36
		1364.72	240.789	2.00657		1364.72	247.952	352.066	1364.72	232.955	701.941	1364.72	195.993	1101.4	1364.72	85.7096	1400.61
		1366.39	279.732	2.3311		1366.39	205.233	351.71	1366.39	172.007	701.433	1366.39	215.858	1101.54	1366.39	290.951	1402.08
		1368.06	369.983	3.08319		1368.06	336.853	352.807	1368.06	278.068	702.317	1368.06	241.617	1101.73	1368.06	364.424	1402.6
		1369.74	299.084	2.49237		1369.74	336.641	352.805	1369.74	362.195	703.018	1369.74	359.725	1102.57	1369.74	322.157	1402.3
		1371.41	339.56	2.82967		1371.41	513.785	354.282	1371.41	377.474	703.146	1371.41	316.672	1102.26	1371.41	345.827	1402.47
		1373.08	306.759	2.55633		1373.08	327.427	352.729	1373.08	309.199	702.577	1373.08	266.288	1101.9	1373.08	247.825	1401.77
		1374.75	83.3285	0.694404		1374.75	280.296	352.336	1374.75	265.829	702.215	1374.75	145.517	1101.04	1374.75	270.019	1401.93
		1376.42	41.6818	0.347348		1376.42	173.021	351.442	1376.42	80.1876	700.668	1376.42	33.5203	1100.24	1376.42	60.4968	1400.43
		1378.09	73.3727	0.611439		1378.09	74.4987	350.621	1378.09	44.0983	700.367	1378.09	-3.69641	1099.97	1378.09	62.1207	1400.44
		1379.76	52.2675	0.435562		1379.76	-4.98105	349.958	1379.76	56.428	700.47	1379.76	6.05007	1100.04	1379.76	44.6772	1400.32
		1381.43	17.9546	0.149621		1381.43	-16.9815	349.858	1381.43	-11.9479	699.9	1381.43	-42.8841	1099.69	1381.43	16.9519	1400.12
		1383.1	-6.08446	-0.0507038		1383.1	45.886	350.382	1383.1	69.389	700.578	1383.1	-65.391	1099.53	1383.1	-29.8608	1399.79
		1384.77	18.3244	0.152703		1384.77	-17.4891	349.854	1384.77	-97.3673	699.189	1384.77	-95.2362	1099.32	1384.77	-15.0366	1399.89
		1386.44	-73.2568	-0.610473		1386.44	-36.8248	349.693	1386.44	92.6729	700.772	1386.44	-20.8026	1099.85	1386.44	49.7308	1400.36
		1388.11	-29.7334	-0.247778		1388.11	17.2772	350.144	1388.11	91.8545	700.765	1388.11	-5.07201	1099.96	1388.11	-26.4828	1399.81
		1389.78	54.955	0.457959		1389.78	-75.5082	349.371	1389.78	1.42645	700.012	1389.78	40.0674	1100.29	1389.78	8.92576	1400.06
		1391.44	7.43826	0.0619855		1391.44	37.3957	350.312	1391.44	-96.3771	699.197	1391.44	-36.7198	1099.74	1391.44	-58.5126	1399.58
		1393.11	42.2193	0.351828		1393.11	-92.1598	349.232	1393.11	-60.4634	699.496	1393.11	-88.5345	1099.37	1393.11	-1.04927	1399.99
		1394.78	-19.9964	-0.166637		1394.78	-13.0077	349.892	1394.78	-12.7555	699.894	1394.78	-124.175	1099.11	1394.78	-43.5191	1399.69
		1396.45	-71.9379	-0.599483		1396.45	-63.2177	349.473	1396.45	-65.0107	699.458	1396.45	-71.5942	1099.49	1396.45	-2.20234	1399.98
		1398.11	9.94622	0.0828852		1398.11	54.2221	350.452	1398.11	-14.3207	699.881	1398.11	-61.6164	1099.56	1398.11	-27.0417	1399.81
		1399.78	33.0356	0.275297		1399.78	27.5578	350.23	1399.78	-144.532	698.796	1399.78	-101.63	1099.27	1399.78	-7.76134	1399.94
		1401.44	89.9864	0.749886		1401.44	42.0845	350.351	1401.44	53.3178	700.444	1401.44	-128.4	1099.08	1401.44	-101.764	1399.27
		1403.11	26.3014	0.219178		1403.11	-18.4241	349.846	1403.11	27.5831	700.23	1403.11	-10.9367	1099.92	1403.11	67.6237	1400.48
		1404.77	-77.1417	-0.642848		1404.77	59.4096	350.495	1404.77	78.3903	700.653	1404.77	22.6937	1100.16	1404.77	101.665	1400.73
		1406.44	97.6361	0.813634		1406.44	112.247	350.935	1406.44	163.087	701.359	1406.44	35.7385	1100.26	1406.44	125.407	1400.9
		1408.1	153.224	1.27687		1408.1	212.241	351.769	1408.1	59.3512	700.495	1408.1	144.53	1101.03	1408.1	121.189	1400.87
		1409.77	225.049	1.87541		1409.77	400.655	353.339	1409.77	263.416	702.195	1409.77	238.656	1101.7	1409.77	298.133	1402.13
		1411.43	629.858	5.24882		1411.43	696.703	355.806	1411.43	581.023	704.842	1411.43	537.618	1103.84	1411.43	535.56	1403.83
		1413.09	1140.94	9.50783		1413.09	1324.41	361.037	1413.09	1102.11	709.184	1413.09	1094.58	1107.82	1413.09	1104.62	1407.89
		1414.75	1773.1	14.7759		1414.75	2304.64	369.205	1414.75	1930	716.083	1414.75	1939.19	1113.85	1414.75	1909.73	1413.64
		1416.42	2345.11	19.5426		1416.42	2841.57	373.68	1416.42	2613.78	721.781	1416.42	2414.17	1117.24	1416.42	2586.94	1418.48
		1418.08	2177.2	18.1433		1418.08	2640.05	372	1418.08	2348.33	719.569	1418.08	2295.17	1116.39	1418.08	2541.96	1418.16
		1419.74	1574.18	13.1182		1419.74	2022.58	366.855	1419.74	1864.53	715.538	1419.74	1811.88	1112.94	1419.74	1852.5	1413.23
		1421.4	1221.69	10.1807		1421.4	1422.55	361.855	1421.4	1238.94	710.324	1421.4	1191.23	1108.51	1421.4	1342.71	1409.59
		1423.06	969.378	8.07815		1423.06	1123.25	359.36	1423.06	1064.55	708.871	1423.06	971.618	1106.94	1423.06	927.122	1406.62
		1424.72	796.662	6.63885		1424.72	933.025	357.775	1424.72	882.733	707.356	1424.72	741.607	1105.3	1424.72	896.518	1406.4
		1426.38	818.716	6.82263		1426.38	995.124	358.293	1426.38	953.25	707.944	1426.38	876.083	1106.26	1426.38	871.804	1406.23
		1428.04	960.371	8.00309		1428.04	1136.97	359.475	1428.04	1023.81	708.532	1428.04	916.146	1106.54	1428.04	1074.43	1407.67
		1429.7	1164.12	9.70096		1429.7	1271.51	360.596	1429.7	1091.47	709.096	1429.7	1180.68	1108.43	1429.7	1139.81	1408.14
		1431.36	1422.61	11.8551		1431.36	1725.12	364.376	1431.36	1513.63	712.614	1431.36	1458.65	1110.42	1431.36	1327.82	1409.48
		1433.02	1752.12	14.601		1433.02	2245.4	368.712	1433.02	1831.1	715.259	1433.02	1937.63	1113.84	1433.02	1840.88	1413.15
		1434.68	2347.75	19.5646		1434.68	2901.85	374.182	1434.68	2394	719.95	1434.68	2453.78	1117.53	1434.68	2419.18	1417.28
		1436.34	3035.27	25.2939		1436.34	3657.59	380.48	1436.34	3124.16	726.035	1436.34	3159.33	1122.57	1436.34	3149.94	1422.5
		1437.99	3947.78	32.8981		1437.99	4854.16	390.451	1437.99	3983.24	733.194	1437.99	4292.37	1130.66	1437.99	3959.36	1428.28
		1439.65	4402.35	36.6862		1439.65	5669.78	397.248	1439.65	4552.91	737.941	1439.65	4938.01	1135.27	1439.65	4562.12	1432.59
		1441.31	4456.37	37.1364		1441.31	5594.04	396.617	1441.31	4612.66	738.439	1441.31	5001.28	1135.72	1441.31	4677.14	1433.41
		1442.97	3895.12	32.4594		1442.97	5095.26	392.461	1442.97	4030.53	733.588	1442.97	4413.79	1131.53	1442.97	4141.4	1429.58
		1444.62	3170.92	26.4243		1444.62	4115.46	384.296	1444.62	3414.14	728.451	1444.62	3613.03	1125.81	1444.62	3401.27	1424.29
		1446.28	2582.56	21.5213		1446.28	3329.1	377.742	1446.28	2825.63	723.547	1446.28	2880	1120.57	1446.28	2708.19	1419.34
		1447.94	2119.76	17.6647		1447.94	2860.62	373.838	1447.94	2222.08	718.517	1447.94	2444.16	1117.46	1447.94	2260.49	1416.15
		1449.59	2013.55	16.7796		1449.59	2350.5	369.587	1449.59	1992.83	716.607	1449.59	2304.23	1116.46	1449.59	2166.41	1415.47
		1451.24	1907.3	15.8942		1451.24	2279.92	368.999	1451.24	2086.29	717.386	1451.24	2016.17	1114.4	1451.24	1934.58	1413.82
		1452.9	1907.65	15.8971		1452.9	2381.1	369.843	1452.9	1922.11	716.018	1452.9	2036.03	1114.54	1452.9	2146.94	1415.34
		1454.55	1934.68	16.1223		1454.55	2383.09	369.859	1454.55	1907.49	715.896	1454.55	2075.18	1114.82	1454.55	2033.5	1414.53
		1456.21	2132.12	17.7676		1456.21	2460.65	370.505	1456.21	2086.98	717.391	1456.21	2223.99	1115.89	1456.21	2087.45	1414.91
		1457.86	2134.03	17.7836		1457.86	2677.54	372.313	1457.86	2251.73	718.764	1457.86	2390.64	1117.08	1457.86	2182.89	1415.59
		1459.52	2186.36	18.2197		1459.52	2667.75	372.231	1459.52	2163.12	718.026	1459.52	2575.16	1118.39	1459.52	2220.56	1415.86
		1461.17	2203.14	18.3595		1461.17	2821.03	373.509	1461.17	2304.28	719.202	1461.17	2572.96	1118.38	1461.17	2290.87	1416.36
		1462.82	2297.05	19.1421		1462.82	2962.52	374.688	1462.82	2455.9	720.466	1462.82	2526.28	1118.04	1462.82	2321.16	1416.58
		1464.47	2299.06	19.1588		1464.47	2777.78	373.148	1464.47	2272.41	718.937	1464.47	2541.87	1118.16	1464.47	2312.9	1416.52
		1466.12	2035.54	16.9628		1466.12	2658.23	372.152	1466.12	2241.65	718.68	1466.12	2340.89	1116.72	1466.12	2223.03	1415.88
		1467.78	1997.45	16.6454		1467.78	2408.07	370.067	1467.78	1964.6	716.372	1467.78	2169.51	1115.5	1467.78	1895.73	1413.54
		1469.43	1724.87	14.3739		1469.43	2128.11	367.734	1469.43	1723.06	714.359	1469.43	1796.21	1112.83	1469.43	1578.65	1411.28
		1471.08	1340.86	11.1739		1471.08	1845.08	365.376	1471.08	1428	711.9	1471.08	1569.72	1111.21	1471.08	1411.37	1410.08
		1472.73	1198.71	9.98929		1472.73	1370.39	361.42	1472.73	1215.99	710.133	1472.73	1298.59	1109.28	1472.73	1088.12	1407.77
		1474.38	1028.3	8.56918		1474.38	1152.42	359.604	1474.38	913.308	707.611	1474.38	1034.76	1107.39	1474.38	1039.45	1407.42
		1476.03	756.825	6.30687		1476.03	825.926	356.883	1476.03	684.787	705.707	1476.03	747.066	1105.34	1476.03	625.349	1404.47
		1477.68	563.988	4.6999		1477.68	716.205	355.968	1477.68	500.764	704.173	1477.68	639.013	1104.56	1477.68	589.919	1404.21
		1479.33	495.903	4.13252		1479.33	664.39	355.537	1479.33	538.089	704.484	1479.33	544.285	1103.89	1479.33	585.668	1404.18
		1480.98	399.559	3.32966		1480.98	548.636	354.572	1480.98	380.737	703.173	1480.98	458.425	1103.27	1480.98	477.356	1403.41
		1482.62	346.299	2.88583		1482.62	419.458	353.495	1482.62	309.565	702.58	1482.62	329.419	1102.35	1482.62	355.616	1402.54
		1484.27	296.005	2.46671		1484.27	330.376	352.753	1484.27	217.57	701.813	1484.27	280.653	1102	1484.27	296.27	1402.12
		1485.92	227.852	1.89877		1485.92	262.069	352.184	1485.92	208.83	701.74	1485.92	230.366	1101.65	1485.92	238.366	1401.7
		1487.57	207.285	1.72737		1487.57	259.189	352.16	1487.57	192.671	701.606	1487.57	291.623	1102.08	1487.57	156.632	1401.12
		1489.21	177.79	1.48159		1489.21	266.713	352.223	1489.21	173.54	701.446	1489.21	126.739	1100.91	1489.21	189.405	1401.35
		1490.86	154.25	1.28542		1490.86	128.404	351.07	1490.86	129.124	701.076	1490.86	161.198	1101.15	1490.86	235.58	1401.68
		1492.51	153.038	1.27531		1492.51	161.207	351.343	1492.51	242.483	702.021	1492.51	134.634	1100.96	1492.51	165.658	1401.18
		1494.15	29.7554	0.247962		1494.15	249.104	352.076	1494.15	195.118	701.626	1494.15	158.669	1101.13	1494.15	123.978	1400.89
		1495.8	186.384	1.5532		1495.8	69.0034	350.575	1495.8	140.308	701.169	1495.8	239.295	1101.71	1495.8	177.575	1401.27
		1497.44	188.191	1.56826		1497.44	80.9555	350.675	1497.44	16.9785	700.141	1497.44	20.5732	1100.15	1497.44	65.8541	1400.47
		1499.09	73.8091	0.615076		1499.09	15.4355	350.129	1499.09	78.3316	700.653	1499.09	117.562	1100.84	1499.09	126.868	1400.91
		1500.73	57.7339	0.481116		1500.73	79.5213	350.663	1500.73	121.851	701.015	1500.73	87.9328	1100.63	1500.73	98.4956	1400.7
		1502.38	117.67	0.980583		1502.38	185.358	351.545	1502.38	104.299	700.869	1502.38	-1.33576	1099.99	1502.38	129.707	1400.93
		1504.02	80.7508	0.672923		1504.02	118.322	350.986	1504.02	-25.0388	699.791	1504.02	-35.4958	1099.75	1504.02	46.1403	1400.33
		1505.67	34.8781	0.290651		1505.67	30.3712	350.253	1505.67	-5.32568	699.956	1505.67	74.9342	1100.54	1505.67	114.59	1400.82
		1507.31	59.0889	0.492408		1507.31	-77.0042	349.358	1507.31	-3.47952	699.971	1507.31	-44.2572	1099.68	1507.31	80.1568	1400.57
		1508.95	34.0969	0.284141		1508.95	-5.44085	349.955	1508.95	81.9109	700.683	1508.95	-53.1361	1099.62	1508.95	-49.7732	1399.64
		1510.59	110.554	0.921287		1510.59	31.8305	350.265	1510.59	-10.1869	699.915	1510.59	48.3656	1100.35	1510.59	173.804	1401.24
		1512.24	69.1675	0.576396		1512.24	0.466449	350.004	1512.24	42.4363	700.354	1512.24	-69.4642	1099.5	1512.24	-38.2773	1399.73
		1513.88	-0.585059	-0.00487549		1513.88	-74.2034	349.382	1513.88	-75.0552	699.375	1513.88	55.9215	1100.4	1513.88	139.082	1400.99
		1515.52	35.6368	0.296973		1515.52	16.7986	350.14	1515.52	56.7296	700.473	1515.52	102.226	1100.73	1515.52	119.445	1400.85
		1517.16	-19.2	-0.16		1517.16	-20.5832	349.828	1517.16	36.2791	700.302	1517.16	-120.239	1099.14	1517.16	89.3238	1400.64
		1518.8	48.4147	0.403456		1518.8	51.0327	350.425	1518.8	-85.724	699.286	1518.8	-27.6941	1099.8	1518.8	18.8406	1400.13
		1520.44	72.7469	0.606224		1520.44	-14.7612	349.877	1520.44	25.2651	700.211	1520.44	-6.83381	1099.95	1520.44	114.114	1400.82
		1522.08	-20.9364	-0.17447		1522.08	25.4877	350.212	1522.08	-42.9799	699.642	1522.08	9.53133	1100.07	1522.08	-26.6681	1399.81
		1523.72	-62.3455	-0.519546		1523.72	-55.3066	349.539	1523.72	-14.105	699.882	1523.72	-18.9525	1099.86	1523.72	-37.5216	1399.73
		1525.36	21.7962	0.181635		1525.36	52.196	350.435	1525.36	104.483	700.871	1525.36	69.1249	1100.49	1525.36	-90.2506	1399.36
		1527	53.6549	0.447124		1527	32.6518	350.272	1527	67.6468	700.564	1527	-29.6666	1099.79	1527	124.584	1400.89
		1528.64	40.6744	0.338953		1528.64	105.799	350.882	1528.64	-63.4023	699.472	1528.64	56.9006	1100.41	1528.64	-16.4162	1399.88
		1530.28	23.2095	0.193413		1530.28	-70.8151	349.41	1530.28	-58.3898	699.513	1530.28	26.8163	1100.19	1530.28	7.01868	1400.05
		1531.92	116.449	0.970406		1531.92	-97.9183	349.184	1531.92	-5.49316	699.954	1531.92	75.9803	1100.54	1531.92	-60.8217	1399.57
		1533.55	22.6986	0.189155		1533.55	-44.2407	349.631	1533.55	59.4113	700.495	1533.55	53.3217	1100.38	1533.55	-0.030575	1400
		1535.19	-44.1458	-0.367881		1535.19	103.725	350.864	1535.19	39.0389	700.325	1535.19	-6.79583	1099.95	1535.19	165.509	1401.18
		1536.83	94.0707	0.783922		1536.83	42.1729	350.351	1536.83	103.998	700.867	1536.83	48.3031	1100.35	1536.83	79.6097	1400.57
		1538.46	-62.6049	-0.521708		1538.46	-43.3767	349.639	1538.46	-4.68716	699.961	1538.46	121.363	1100.87	1538.46	77.4875	1400.55
		1540.1	-23.1588	-0.19299		1540.1	79.1816	350.66	1540.1	19.8724	700.166	1540.1	-4.75136	1099.97	1540.1	72.3354	1400.52
		1541.74	46.2702	0.385585		1541.74	-33.3849	349.722	1541.74	11.503	700.096	1541.74	75.7639	1100.54	1541.74	-33.2017	1399.76
		1543.37	48.315	0.402625		1543.37	-56.1316	349.532	1543.37	34.5935	700.288	1543.37	33.4233	1100.24	1543.37	124.853	1400.89
		1545.01	8.41117	0.0700931		1545.01	-42.9351	349.642	1545.01	5.25952	700.044	1545.01	-16.4522	1099.88	1545.01	-102.167	1399.27
		1546.64	77.9106	0.649255		1546.64	0.224678	350.002	1546.64	-15.0875	699.874	1546.64	132.961	1100.95	1546.64	-14.5677	1399.9
		1548.28	12.5236	0.104364		1548.28	23.895	350.199	1548.28	3.54031	700.03	1548.28	-50.403	1099.64	1548.28	11.5666	1400.08
		1549.91	94.0611	0.783842		1549.91	56.5526	350.471	1549.91	-61.7861	699.485	1549.91	34.5222	1100.25	1549.91	51.1685	1400.37
		1551.54	34.6631	0.288859		1551.54	-53.2671	349.556	1551.54	-16.1468	699.865	1551.54	-27.5208	1099.8	1551.54	-35.2218	1399.75
		1553.18	-74.258	-0.618817		1553.18	13.849	350.115	1553.18	-21.4918	699.821	1553.18	49.8748	1100.36	1553.18	11.8086	1400.08
		1554.81	64.3466	0.536221		1554.81	62.9743	350.525	1554.81	-40.3313	699.664	1554.81	31.2491	1100.22	1554.81	76.8331	1400.55
		1556.45	-52.1046	-0.434205		1556.45	106.096	350.884	1556.45	66.8847	700.557	1556.45	90.6153	1100.65	1556.45	27.79	1400.2
		1558.08	155.62	1.29683		1558.08	-32.409	349.73	1558.08	30.0517	700.25	1558.08	-48.1651	1099.66	1558.08	25.2161	1400.18
		1559.71	-22.405	-0.186709		1559.71	-20.8615	349.826	1559.71	-33.817	699.718	1559.71	54.6729	1100.39	1559.71	-46.4626	1399.67
		1561.34	-36.8188	-0.306823		1561.34	-69.3913	349.422	1561.34	77.9896	700.65	1561.34	52.4076	1100.37	1561.34	-37.1159	1399.73
		1562.97	-39.2197	-0.326831		1562.97	-32.3599	349.73	1562.97	-3.91356	699.967	1562.97	-103.105	1099.26	1562.97	30.7567	1400.22
		1564.61	16.973	0.141442		1564.61	85.7929	350.715	1564.61	-34.7648	699.71	1564.61	-36.3793	1099.74	1564.61	37.0301	1400.26
		1566.24	-36.4951	-0.304126		1566.24	28.1681	350.235	1566.24	143.233	701.194	1566.24	-59.8211	1099.57	1566.24	4.19278	1400.03
		1567.87	-40.3857	-0.336547		1567.87	30.61	350.255	1567.87	98.8768	700.824	1567.87	-2.15739	1099.98	1567.87	10.3713	1400.07
		1569.5	2.32757	0.0193965		1569.5	-39.1196	349.674	1569.5	-10.1297	699.916	1569.5	97.5871	1100.7	1569.5	54.0957	1400.39
		1571.13	-7.5627	-0.0630225		1571.13	-33.7351	349.719	1571.13	50.713	700.423	1571.13	40.9558	1100.29	1571.13	93.2696	1400.67
		1572.76	-58.056	-0.4838		1572.76	69.3829	350.578	1572.76	7.82134	700.065	1572.76	-12.7268	1099.91	1572.76	15.1216	1400.11
		1574.38	-19.8213	-0.165177		1574.38	-15.5034	349.871	1574.38	-72.6923	699.394	1574.38	10.2366	1100.07	1574.38	52.7125	1400.38
		1576.01	-10.1523	-0.0846024		1576.01	-35.7602	349.702	1576.01	40.8378	700.34	1576.01	36.1749	1100.26	1576.01	88.7642	1400.63
		1577.64	52.1914	0.434928		1577.64	-1.88058	349.984	1577.64	-27.6656	699.769	1577.64	15.4307	1100.11	1577.64	-10.6513	1399.92
		1579.27	-55.5113	-0.462594		1579.27	-25.2015	349.79	1579.27	-34.4842	699.713	1579.27	-11.38	1099.92	1579.27	-19.8425	1399.86
		1580.9	39.9737	0.333114		1580.9	41.7564	350.348	1580.9	-109.057	699.091	1580.9	44.5428	1100.32	1580.9	-45.6606	1399.67
		1582.53	18.0555	0.150463		1582.53	54.5143	350.454	1582.53	-99.3364	699.172	1582.53	13.1173	1100.09	1582.53	103.134	1400.74
		1584.15	15.709	0.130908		1584.15	-11.0671	349.908	1584.15	-68.5292	699.429	1584.15	-86.1399	1099.38	1584.15	-17.6467	1399.87
		1585.78	-77.0185	-0.641821		1585.78	10.6627	350.089	1585.78	-34.7	699.711	1585.78	-28.8242	1099.79	1585.78	81.3978	1400.58
		1587.41	9.51237	0.0792698		1587.41	-42.9629	349.642	1587.41	18.7269	700.156	1587.41	58.6011	1100.42	1587.41	-92.2815	1399.34
		1589.03	-1.87209	-0.0156007		1589.03	-92.1135	349.232	1589.03	-86.0566	699.283	1589.03	19.4354	1100.14	1589.03	-56.6054	1399.6
		1590.66	15.3774	0.128145		1590.66	-29.7829	349.752	1590.66	-62.773	699.477	1590.66	-24.3266	1099.83	1590.66	-36.0558	1399.74
		1592.28	-63.8513	-0.532094		1592.28	68.7323	350.573	1592.28	87.1621	700.726	1592.28	11.7568	1100.08	1592.28	-0.467167	1400
		1593.91	-22.4763	-0.187303		1593.91	-37.8242	349.685	1593.91	9.45542	700.079	1593.91	138.282	1100.99	1593.91	-73.4939	1399.48
		1595.53	47.5739	0.39645		1595.53	50.1073	350.418	1595.53	-35.1085	699.707	1595.53	-50.4176	1099.64	1595.53	16.2816	1400.12
		1597.16	48.2595	0.402163		1597.16	11.3215	350.094	1597.16	-97.7999	699.185	1597.16	-3.90837	1099.97	1597.16	48.7097	1400.35
		1598.78	51.9654	0.433045		1598.78	35.8666	350.299	1598.78	40.1642	700.335	1598.78	-5.7073	1099.96	1598.78	-12.4489	1399.91
		1600.4	69.2558	0.577132		1600.4	-84.4958	349.296	1600.4	-18.0183	699.85	1600.4	-33.2157	1099.76	1600.4	60.6252	1400.43
		1602.03	155.99	1.29992		1602.03	-60.0378	349.5	1602.03	-73.2189	699.39	1602.03	26.7558	1100.19	1602.03	32.5184	1400.23
		1603.65	10.2473	0.0853945		1603.65	-28.0473	349.766	1603.65	60.2846	700.502	1603.65	-3.8819	1099.97	1603.65	-12.2592	1399.91
		1605.27	-58.5375	-0.487812		1605.27	-21.7441	349.819	1605.27	8.09231	700.067	1605.27	49.992	1100.36	1605.27	110.52	1400.79
		1606.9	72.0289	0.600241		1606.9	10.1958	350.085	1606.9	23.8346	700.199	1606.9	-81.962	1099.41	1606.9	18.789	1400.13
		1608.52	-11.8805	-0.0990039		1608.52	52.6954	350.439	1608.52	15.407	700.128	1608.52	116.846	1100.83	1608.52	65.9587	1400.47
		1610.14	-50.4947	-0.420789		1610.14	142.012	351.183	1610.14	88.5601	700.738	1610.14	34.6084	1100.25	1610.14	-41.0609	1399.71
		1611.76	-58.8961	-0.490801		1611.76	-58.8553	349.51	1611.76	89.1909	700.743	1611.76	-37.1292	1099.73	1611.76	-16.6867	1399.88
		1613.38	-17.4149	-0.145124		1613.38	31.9201	350.266	1613.38	14.2252	700.119	1613.38	-43.9474	1099.69	1613.38	49.9604	1400.36
		1615	-6.15892	-0.0513243		1615	48.6042	350.405	1615	90.4212	700.754	1615	98.868	1100.71	1615	36.429	1400.26
		1616.62	26.2748	0.218957		1616.62	-14.8902	349.876	1616.62	-117.681	699.019	1616.62	93.4856	1100.67	1616.62	22.8366	1400.16
		1618.24	-13.8901	-0.11575		1618.24	104.575	350.871	1618.24	28.0794	700.234	1618.24	57.7812	1100.41	1618.24	124.121	1400.89
		1619.86	-13.221	-0.110175		1619.86	25.8577	350.215	1619.86	72.523	700.604	1619.86	88.5862	1100.63	1619.86	83.1697	1400.59
		1621.48	17.7122	0.147602		1621.48	49.972	350.416	1621.48	191.124	701.593	1621.48	40.6554	1100.29	1621.48	131.416	1400.94
		1623.1	1.73344	0.0144453		1623.1	36.2155	350.302	1623.1	34.2814	700.286	1623.1	66.8145	1100.48	1623.1	60.0368	1400.43
		1624.72	59.9289	0.499407		1624.72	19.3842	350.162	1624.72	89.3115	700.744	1624.72	42.9669	1100.31	1624.72	83.9339	1400.6
		1626.34	87.862	0.732183		1626.34	25.2277	350.21	1626.34	-2.52677	699.979	1626.34	20.5754	1100.15	1626.34	130.496	1400.93
		1627.96	26.4421	0.220351		1627.96	-23.5018	349.804	1627.96	105.499	700.879	1627.96	45.0583	1100.32	1627.96	25.5352	1400.18
		1629.57	-3.19204	-0.0266003		1629.57	-19.2634	349.839	1629.57	2.99166	700.025	1629.57	58.8981	1100.42	1629.57	9.84844	1400.07
		1631.19	-40.4179	-0.336816		1631.19	-10.5197	349.912	1631.19	-1.08629	699.991	1631.19	62.0787	1100.44	1631.19	30.4472	1400.22
		1632.81	14.7839	0.123199		1632.81	39.1037	350.326	1632.81	-50.6475	699.578	1632.81	-2.99694	1099.98	1632.81	193.439	1401.38
		1634.42	24.5318	0.204432		1634.42	96.2934	350.802	1634.42	-53.2488	699.556	1634.42	1.57971	1100.01	1634.42	89.6495	1400.64
		1636.04	61.5686	0.513071		1636.04	65.5172	350.546	1636.04	-5.84093	699.951	1636.04	30.3467	1100.22	1636.04	41.8258	1400.3
		1637.66	80.4211	0.670176		1637.66	30.1443	350.251	1637.66	134.08	701.117	1637.66	21.1646	1100.15	1637.66	-34.8938	1399.75
		1639.27	81.0739	0.675615		1639.27	161.55	351.346	1639.27	126.907	701.058	1639.27	125.667	1100.9	1639.27	114.266	1400.82
		1640.89	112.066	0.933885		1640.89	191.329	351.594	1640.89	40.8293	700.34	1640.89	102.726	1100.73	1640.89	55.5813	1400.4
		1642.5	141.551	1.17959		1642.5	55.6861	350.464	1642.5	54.8531	700.457	1642.5	63.035	1100.45	1642.5	143.998	1401.03
		1644.12	60.2468	0.502057		1644.12	171.877	351.432	1644.12	44.5737	700.371	1644.12	8.07814	1100.06	1644.12	95.763	1400.68
		1645.73	57.8424	0.48202		1645.73	133.229	351.11	1645.73	126.872	701.057	1645.73	69.9275	1100.5	1645.73	211.379	1401.51
		1647.35	55.4337	0.461947		1647.35	29.2386	350.244	1647.35	110.496	700.921	1647.35	-10.9739	1099.92	1647.35	159.957	1401.14
		1648.96	72.7616	0.606346		1648.96	125.626	351.047	1648.96	75.8689	700.632	1648.96	166.206	1101.19	1648.96	-14.5803	1399.9
		1650.57	3.50755	0.0292296		1650.57	-13.4387	349.888	1650.57	111.081	700.926	1650.57	107.953	1100.77	1650.57	99.3401	1400.71
		1652.19	4.10795	0.0342329		1652.19	93.5221	350.779	1652.19	67.2814	700.561	1652.19	16.1893	1100.12	1652.19	163.089	1401.16
		1653.8	0.145696	0.00121413		1653.8	15.094	350.126	1653.8	94.8718	700.791	1653.8	-68.0651	1099.51	1653.8	80.9132	1400.58
		1655.41	18.9732	0.15811		1655.41	-19.3448	349.839	1655.41	-58.4301	699.513	1655.41	61.8866	1100.44	1655.41	19.8853	1400.14
		1657.02	-7.80419	-0.0650349		1657.02	86.0296	350.717	1657.02	7.10799	700.059	1657.02	82.3818	1100.59	1657.02	154.88	1401.11
		1658.63	23.1835	0.193196		1658.63	18.0528	350.15	1658.63	57.4445	700.479	1658.63	46.562	1100.33	1658.63	26.7849	1400.19
		1660.24	-32.5143	-0.270952		1660.24	10.8355	350.09	1660.24	11.9614	700.1	1660.24	10.6653	1100.08	1660.24	68.8954	1400.49
		1661.86	97.3474	0.811228		1661.86	125.265	351.044	1661.86	-22.916	699.809	1661.86	97.9108	1100.7	1661.86	-4.67406	1399.97
		1663.47	2.06818	0.0172348		1663.47	-5.27388	349.956	1663.47	7.59499	700.063	1663.47	101.445	1100.72	1663.47	131.615	1400.94
		1665.08	-23.2504	-0.193753		1665.08	10.1918	350.085	1665.08	15.2724	700.127	1665.08	-39.6451	1099.72	1665.08	137.011	1400.98
		1666.69	-15.0989	-0.125824		1666.69	100.202	350.835	1666.69	70.1163	700.584	1666.69	39.8582	1100.28	1666.69	47.949	1400.34
		1668.29	64.6059	0.538382		1668.29	-99.0737	349.174	1668.29	54.9227	700.458	1668.29	41.6861	1100.3	1668.29	7.48406	1400.05
		1669.9	72.7641	0.606367		1669.9	66.9929	350.558	1669.9	7.71809	700.064	1669.9	32.7922	1100.23	1669.9	-90.9507	1399.35
		1671.51	29.1319	0.242766		1671.51	24.4104	350.203	1671.51	44.2403	700.369	1671.51	22.3091	1100.16	1671.51	101.405	1400.72
		1673.12	70.7866	0.589888		1673.12	-10.6229	349.911	1673.12	-71.5935	699.403	1673.12	-62.8891	1099.55	1673.12	92.6586	1400.66
		1674.73	62.1684	0.51807		1674.73	-10.6635	349.911	1674.73	-15.3099	699.872	1674.73	110.867	1100.79	1674.73	1.55482	1400.01
		1676.34	12.3882	0.103235		1676.34	85.2624	350.711	1676.34	37.9216	700.316	1676.34	-3.41844	1099.98	1676.34	99.311	1400.71
		1677.95	93.6775	0.780646		1677.95	74.4703	350.621	1677.95	95.7212	700.798	1677.95	11.7602	1100.08	1677.95	46.1045	1400.33
		1679.55	74.3609	0.619674		1679.55	37.7024	350.314	1679.55	-24.8743	699.793	1679.55	-24.9574	1099.82	1679.55	9.55937	1400.07
		1681.16	-50.1996	-0.41833		1681.16	57.2947	350.477	1681.16	-57.0967	699.524	1681.16	60.2506	1100.43	1681.16	-16.4141	1399.88
		1682.77	81.4403	0.678669		1682.77	34.1451	350.285	1682.77	-46.6439	699.611	1682.77	-49.8004	1099.64	1682.77	18.5429	1400.13
		1684.37	77.3396	0.644496		1684.37	15.5008	350.129	1684.37	67.5228	700.563	1684.37	-5.87934	1099.96	1684.37	1.53624	1400.01
		1685.98	-4.59482	-0.0382902		1685.98	92.9455	350.775	1685.98	73.3699	700.611	1685.98	-19.9763	1099.86	1685.98	-41.4926	1399.7
		1687.58	17.2161	0.143468		1687.58	-3.62765	349.97	1687.58	12.0331	700.1	1687.58	-49.4042	1099.65	1687.58	43.5801	1400.31
		1689.19	16.1274	0.134395		1689.19	44.7362	350.373	1689.19	66.6638	700.556	1689.19	136.347	1100.97	1689.19	-98.868	1399.29
		1690.79	18.0851	0.150709		1690.79	2.99012	350.025	1690.79	46.4741	700.387	1690.79	-30.5945	1099.78	1690.79	-30.7315	1399.78
		1692.4	-13.5677	-0.113064		1692.4	-66.327	349.447	1692.4	123.983	701.033	1692.4	68.0618	1100.49	1692.4	165.615	1401.18
		1694	78.4922	0.654102		1694	-4.34219	349.964	1694	56.3812	700.47	1694	-8.9596	1099.94	1694	53.3993	1400.38
		1695.61	-15.824	-0.131866		1695.61	53.0214	350.442	1695.61	-38.7894	699.677	1695.61	36.1434	1100.26	1695.61	-20.7744	1399.85
		1697.21	48.7466	0.406221		1697.21	-1.19174	349.99	1697.21	53.946	700.45	1697.21	-37.9822	1099.73	1697.21	44.0143	1400.31
		1698.81	-65.5016	-0.545847		1698.81	20.9585	350.175	1698.81	-30.6131	699.745	1698.81	3.98188	1100.03	1698.81	9.40164	1400.07
		1700.42	12.8252	0.106877		1700.42	113.381	350.945	1700.42	-57.1505	699.524	1700.42	-51.9567	1099.63	1700.42	-34.5079	1399.75
		1702.02	-78.5607	-0.654673		1702.02	-9.81076	349.918	1702.02	40.1382	700.334	1702.02	-49.8569	1099.64	1702.02	-72.3934	1399.48
		1703.62	16.5997	0.138331		1703.62	67.2436	350.56	1703.62	56.3649	700.47	1703.62	79.1167	1100.57	1703.62	122.076	1400.87
		1705.22	-10.5924	-0.0882697		1705.22	31.0843	350.259	1705.22	31.2683	700.261	1705.22	42.8796	1100.31	1705.22	54.9565	1400.39
		1706.82	-48.5172	-0.40431		1706.82	-21.974	349.817	1706.82	-48.9556	699.592	1706.82	14.2181	1100.1	1706.82	-0.04289	1400
		1708.43	-37.4944	-0.312454		1708.43	53.4494	350.445	1708.43	-57.3163	699.522	1708.43	2.31973	1100.02	1708.43	93.2946	1400.67
		1710.03	17.9162	0.149302		1710.03	-37.9887	349.683	1710.03	76.6543	700.639	1710.03	-0.44364	1100	1710.03	-130.269	1399.07
		1711.63	-21.5895	-0.179913		1711.63	23.578	350.196	1711.63	17.7233	700.148	1711.63	1.31162	1100.01	1711.63	-35.5751	1399.75
		1713.23	44.5459	0.371215		1713.23	45.313	350.378	1713.23	19.9976	700.167	1713.23	67.3416	1100.48	1713.23	-35.8625	1399.74
		1714.83	8.07303	0.0672752		1714.83	-57.0642	349.524	1714.83	-40.5618	699.662	1714.83	-50.4648	1099.64	1714.83	23.4941	1400.17
		1716.43	-3.91364	-0.0326137		1716.43	120.825	351.007	1716.43	-36.8359	699.693	1716.43	-18.2392	1099.87	1716.43	-45.9084	1399.67
		1718.03	34.6512	0.28876		1718.03	64.286	350.536	1718.03	90.9767	700.758	1718.03	-211.313	1098.49	1718.03	17.8807	1400.13
		1719.62	-67.7846	-0.564872		1719.62	7.67049	350.064	1719.62	28.7571	700.24	1719.62	-226.736	1098.38	1719.62	-77.7942	1399.44
		1721.22	36.6809	0.305674		1721.22	4.64555	350.039	1721.22	14.0064	700.117	1721.22	-108.838	1099.22	1721.22	-18.7515	1399.87
		1722.82	-4.48525	-0.0373771		1722.82	16.9	350.141	1722.82	-9.98536	699.917	1722.82	-58.4133	1099.58	1722.82	-8.8437	1399.94
		1724.42	-11.9403	-0.0995026		1724.42	-35.3051	349.706	1724.42	39.5911	700.33	1724.42	-146.05	1098.96	1724.42	14.7773	1400.11
		1726.02	26.6084	0.221736		1726.02	1.38398	350.012	1726.02	35.464	700.296	1726.02	59.2033	1100.42	1726.02	93.5368	1400.67
		1727.61	-34.5656	-0.288047		1727.61	5.81626	350.048	1727.61	-140.538	698.829	1727.61	-117.545	1099.16	1727.61	-70.1777	1399.5
		1729.21	-12.9094	-0.107579		1729.21	-80.3427	349.33	1729.21	-134.035	698.883	1729.21	-32.0087	1099.77	1729.21	134.244	1400.96
		1730.81	-5.06766	-0.0422305		1730.81	42.1695	350.351	1730.81	-61.5562	699.487	1730.81	-21.6871	1099.85	1730.81	-15.8827	1399.89
		1732.4	41.146	0.342883		1732.4	-31.8277	349.735	1732.4	40.0848	700.334	1732.4	126.753	1100.91	1732.4	19.5952	1400.14
		1734	7.51923	0.0626603		1734	-26.06	349.783	1734	-64.0305	699.466	1734	-18.0856	1099.87	1734	71.8853	1400.51
		1735.59	36.8365	0.306971		1735.59	-49.5229	349.587	1735.59	46.7931	700.39	1735.59	24.3351	1100.17	1735.59	107.209	1400.77
		1737.19	7.77955	0.0648296		1737.19	-60.7588	349.494	1737.19	80.817	700.673	1737.19	-94.578	1099.32	1737.19	16.4886	1400.12
		1738.79	-45.8853	-0.382377		1738.79	-30.566	349.745	1738.79	-77.244	699.356	1738.79	24.5622	1100.18	1738.79	-54.3882	1399.61
		1740.38	-36.5728	-0.304773		1740.38	16.5059	350.138	1740.38	-84.7916	699.293	1740.38	-48.3861	1099.65	1740.38	8.33469	1400.06
		1741.97	61.8846	0.515705		1741.97	52.7856	350.44	1741.97	-21.6725	699.819	1741.97	-76.8408	1099.45	1741.97	-35.0703	1399.75
		1743.57	63.5118	0.529265		1743.57	15.2317	350.127	1743.57	-7.76331	699.935	1743.57	33.0117	1100.24	1743.57	-61.675	1399.56
		1745.16	28.2212	0.235176		1745.16	-123.882	348.968	1745.16	129.135	701.076	1745.16	-115.486	1099.18	1745.16	45.4026	1400.32
		1746.75	-10.1727	-0.0847728		1746.75	-0.092792	349.999	1746.75	9.19173	700.077	1746.75	-31.846	1099.77	1746.75	-75.2047	1399.46
		1748.35	-51.6714	-0.430595		1748.35	-17.8358	349.851	1748.35	-92.379	699.23	1748.35	-158.983	1098.86	1748.35	-35.9602	1399.74
		1749.94	-47.0354	-0.391962		1749.94	-61.7821	349.485	1749.94	61.4075	700.512	1749.94	-130.796	1099.07	1749.94	-39.8548	1399.72
		1751.53	-13.1681	-0.109734		1751.53	29.6385	350.247	1751.53	64.3929	700.537	1751.53	-85.7166	1099.39	1751.53	54.6556	1400.39
		1753.12	-59.3457	-0.494548		1753.12	34.8425	350.29	1753.12	10.3845	700.087	1753.12	-129.95	1099.07	1753.12	-109.499	1399.22
		1754.71	-11.6344	-0.0969531		1754.71	16.9024	350.141	1754.71	-77.558	699.354	1754.71	-47.9972	1099.66	1754.71	6.40853	1400.05
		1756.31	9.90425	0.0825355		1756.31	-85.7949	349.285	1756.31	37.7041	700.314	1756.31	-63.0781	1099.55	1756.31	45.2725	1400.32
		1757.9	-37.872	-0.3156		1757.9	14.7511	350.123	1757.9	43.6223	700.364	1757.9	-81.2774	1099.42	1757.9	-79.1906	1399.43
		1759.49	83.7871	0.698226		1759.49	-6.43523	349.946	1759.49	17.1408	700.143	1759.49	-48.7055	1099.65	1759.49	53.4687	1400.38
		1761.08	-10.2476	-0.085397		1761.08	-16.8792	349.859	1761.08	-128.035	698.933	1761.08	-57.7568	1099.59	1761.08	93.6571	1400.67
		1762.67	8.17985	0.0681654		1762.67	17.3203	350.144	1762.67	79.6428	700.664	1762.67	87.2709	1100.62	1762.67	-43.4752	1399.69
		1764.26	-55.1021	-0.459184		1764.26	106.983	350.892	1764.26	12.963	700.108	1764.26	-91.4227	1099.35	1764.26	7.3207	1400.05
		1765.85	43.4785	0.362321		1765.85	-57.7835	349.518	1765.85	134.33	701.119	1765.85	-46.6565	1099.67	1765.85	62.6733	1400.45
		1767.44	40.3026	0.335855		1767.44	25.6484	350.214	1767.44	-11.0885	699.908	1767.44	-71.2999	1099.49	1767.44	117.982	1400.84
		1769.03	103.44	0.862003		1769.03	-59.0867	349.508	1769.03	-25.4992	699.788	1769.03	-92.9292	1099.34	1769.03	43.6276	1400.31
		1770.61	44.7071	0.372559		1770.61	-14.2886	349.881	1770.61	21.7695	700.181	1770.61	30.4373	1100.22	1770.61	-26.1953	1399.81
		1772.2	49.2085	0.410071		1772.2	-60.5682	349.495	1772.2	89.08	700.742	1772.2	51.9612	1100.37	1772.2	-11.2594	1399.92
		1773.79	-23.4768	-0.19564		1773.79	-9.67333	349.919	1773.79	25.1802	700.21	1773.79	-71.638	1099.49	1773.79	83.8574	1400.6
		1775.38	39.6562	0.330468		1775.38	48.9296	350.408	1775.38	-57.3014	699.522	1775.38	-67.1741	1099.52	1775.38	-49.5384	1399.65
		1776.96	27.1363	0.226136		1776.96	8.66899	350.072	1776.96	108.742	700.906	1776.96	42.2368	1100.3	1776.96	-42.5822	1399.7
		1778.55	96.4591	0.803826		1778.55	19.328	350.161	1778.55	44.6993	700.372	1778.55	55.9123	1100.4	1778.55	56.9825	1400.41
		1780.13	57.6625	0.480521		1780.13	113.364	350.945	1780.13	65.5537	700.546	1780.13	63.3748	1100.45	1780.13	159.592	1401.14
		1781.72	28.1084	0.234236		1781.72	-15.1034	349.874	1781.72	101.829	700.849	1781.72	-116.157	1099.17	1781.72	59.7476	1400.43
		1783.31	21.7112	0.180926		1783.31	71.146	350.593	1783.31	12.8986	700.107	1783.31	42.6491	1100.3	1783.31	50.957	1400.36
		1784.89	44.6686	0.372239		1784.89	118.742	350.99	1784.89	163.485	701.362	1784.89	128.833	1100.92	1784.89	3.43346	1400.02
		1786.48	28.9745	0.241454		1786.48	92.1165	350.768	1786.48	62.0941	700.517	1786.48	6.31324	1100.05	1786.48	111.984	1400.8
		1788.06	41.0938	0.342448		1788.06	158.204	351.318	1788.06	11.643	700.097	1788.06	135.752	1100.97	1788.06	5.52185	1400.04
		1789.65	59.3958	0.494965		1789.65	-58.7596	349.51	1789.65	162.215	701.352	1789.65	121.381	1100.87	1789.65	126.324	1400.9
		1791.23	133.387	1.11156		1791.23	28.9095	350.241	1791.23	215.347	701.795	1791.23	41.9943	1100.3	1791.23	59.9011	1400.43
		1792.81	66.587	0.554891		1792.81	79.4352	350.662	1792.81	54.9274	700.458	1792.81	180.718	1101.29	1792.81	132.631	1400.95
		1794.4	63.2053	0.526711		1794.4	1.49682	350.012	1794.4	75.4904	700.629	1794.4	13.0426	1100.09	1794.4	67.5896	1400.48
		1795.98	81.4794	0.678995		1795.98	115.42	350.962	1795.98	34.0926	700.284	1795.98	60.4194	1100.43	1795.98	132.447	1400.95
		1797.56	82.7206	0.689339		1797.56	48.2107	350.402	1797.56	88.6457	700.739	1797.56	7.16051	1100.05	1797.56	113.667	1400.81
		1799.14	40.5889	0.338241		1799.14	39.7796	350.331	1799.14	85.8825	700.716	1799.14	56.0586	1100.4	1799.14	34.4013	1400.25
		1800.73	-37.1981	-0.309984		1800.73	111.85	350.932	1800.73	114.059	700.95	1800.73	25.9493	1100.19	1800.73	61.9012	1400.44
		1802.31	84.8283	0.706902		1802.31	143.628	351.197	1802.31	204.179	701.701	1802.31	96.5013	1100.69	1802.31	202.431	1401.45
		1803.89	95.3222	0.794352		1803.89	127.34	351.061	1803.89	43.2634	700.361	1803.89	95.7708	1100.68	1803.89	79.508	1400.57
		1805.47	108.912	0.907599		1805.47	45.9252	350.383	1805.47	94.5931	700.788	1805.47	70.2311	1100.5	1805.47	139.373	1401
		1807.05	23.2774	0.193979		1807.05	110.144	350.918	1807.05	181.55	701.513	1807.05	182.606	1101.3	1807.05	210.011	1401.5
		1808.63	97.307	0.810892		1808.63	158.86	351.324	1808.63	31.2798	700.261	1808.63	107.401	1100.77	1808.63	285.279	1402.04
		1810.21	176.009	1.46674		1810.21	-65.3982	349.455	1810.21	28.2431	700.235	1810.21	42.9947	1100.31	1810.21	44.1225	1400.32
		1811.79	79.4459	0.662049		1811.79	175.575	351.463	1811.79	305.935	702.549	1811.79	90.2222	1100.64	1811.79	10.6517	1400.08
		1813.37	144.194	1.20162		1813.37	27.192	350.227	1813.37	-49.3062	699.589	1813.37	-30.1019	1099.78	1813.37	160.199	1401.14
		1814.95	120.499	1.00416		1814.95	81.9867	350.683	1814.95	150.818	701.257	1814.95	108.64	1100.78	1814.95	114.175	1400.82
		1816.53	67.2957	0.560797		1816.53	93.3226	350.778	1816.53	158.529	701.321	1816.53	117.052	1100.84	1816.53	136.381	1400.97
		1818.11	116.524	0.97103		1818.11	137.229	351.144	1818.11	90.1348	700.751	1818.11	66.4507	1100.47	1818.11	84.0037	1400.6
		1819.69	75.6983	0.630819		1819.69	101.924	350.849	1819.69	145.9	701.216	1819.69	60.8381	1100.43	1819.69	143.336	1401.02
		1821.26	106.29	0.885746		1821.26	122.483	351.021	1821.26	128.654	701.072	1821.26	137.518	1100.98	1821.26	182.43	1401.3
		1822.84	74.7446	0.622871		1822.84	52.9146	350.441	1822.84	117.578	700.98	1822.84	80.6117	1100.58	1822.84	56.8049	1400.41
		1824.42	63.3788	0.528157		1824.42	123.139	351.026	1824.42	30.3373	700.253	1824.42	48.5412	1100.35	1824.42	70.9241	1400.51
		1826	112.604	0.938369		1826	106.314	350.886	1826	117.072	700.976	1826	28.8531	1100.21	1826	209.281	1401.49
		1827.57	154.071	1.28393		1827.57	77.029	350.642	1827.57	242.678	702.022	1827.57	51.1263	1100.37	1827.57	78.741	1400.56
		1829.15	159.786	1.33155		1829.15	162.75	351.356	1829.15	68.2351	700.569	1829.15	78.0557	1100.56	1829.15	143.976	1401.03
		1830.72	90.8511	0.757092		1830.72	122.514	351.021	1830.72	19.6451	700.164	1830.72	83.2089	1100.59	1830.72	165.63	1401.18
		1832.3	40.5453	0.337878		1832.3	69.8042	350.582	1832.3	86.1089	700.718	1832.3	49.4826	1100.35	1832.3	37.9387	1400.27
		1833.88	39.988	0.333233		1833.88	90.1426	350.751	1833.88	79.4352	700.662	1833.88	154.166	1101.1	1833.88	81.2296	1400.58
		1835.45	-5.70035	-0.047503		1835.45	42.0103	350.35	1835.45	-12.8459	699.893	1835.45	47.2784	1100.34	1835.45	104.273	1400.74
		1837.02	24.8439	0.207032		1837.02	154.132	351.284	1837.02	-27.382	699.772	1837.02	46.1642	1100.33	1837.02	177.067	1401.26
		1838.6	-19.3285	-0.161071		1838.6	53.0074	350.442	1838.6	38.9875	700.325	1838.6	69.9438	1100.5	1838.6	64.5853	1400.46
		1840.17	47.0177	0.391814		1840.17	46.7883	350.39	1840.17	10.3738	700.086	1840.17	70.3665	1100.5	1840.17	159.075	1401.14
		1841.75	93.1371	0.776143		1841.75	-62.2441	349.481	1841.75	56.4652	700.471	1841.75	50.5337	1100.36	1841.75	213.053	1401.52
		1843.32	34.909	0.290908		1843.32	9.35305	350.078	1843.32	48.0365	700.4	1843.32	119.486	1100.85	1843.32	30.2626	1400.22
		1844.89	34.2888	0.28574		1844.89	112.095	350.934	1844.89	83.1821	700.693	1844.89	116.772	1100.83	1844.89	-37.4017	1399.73
		1846.46	63.2703	0.527252		1846.46	169.68	351.414	1846.46	63.781	700.532	1846.46	62.6451	1100.45	1846.46	100.568	1400.72
		1848.04	143.689	1.19741		1848.04	52.6999	350.439	1848.04	-18.005	699.85	1848.04	145.644	1101.04	1848.04	10.9838	1400.08
		1849.61	51.0923	0.425769		1849.61	130.511	351.088	1849.61	34.2098	700.285	1849.61	64.9836	1100.46	1849.61	114.612	1400.82
		1851.18	86.3107	0.719256		1851.18	25.9165	350.216	1851.18	97.3403	700.811	1851.18	38.8761	1100.28	1851.18	88.8395	1400.63
		1852.75	46.6728	0.38894		1852.75	102.146	350.851	1852.75	41.926	700.349	1852.75	101.629	1100.73	1852.75	87.9274	1400.63
		1854.32	67.8497	0.565415		1854.32	66.0894	350.551	1854.32	144.018	701.2	1854.32	-128.836	1099.08	1854.32	41.7538	1400.3
		1855.89	-31.108	-0.259233		1855.89	106.446	350.887	1855.89	30.8118	700.257	1855.89	35.3312	1100.25	1855.89	79.7601	1400.57
		1857.46	88.3592	0.736327		1857.46	70.3302	350.586	1857.46	43.9302	700.366	1857.46	-100.057	1099.29	1857.46	-71.093	1399.49
		1859.03	48.6619	0.405516		1859.03	93.4911	350.779	1859.03	-52.2356	699.565	1859.03	-51.3238	1099.63	1859.03	83.8689	1400.6
		1860.6	76.0714	0.633928		1860.6	43.2654	350.361	1860.6	120.049	701	1860.6	106.711	1100.76	1860.6	43.6984	1400.31
		1862.17	-18.3082	-0.152568		1862.17	49.2297	350.41	1862.17	73.7782	700.615	1862.17	-70.8928	1099.49	1862.17	25.3533	1400.18
		1863.74	2.83726	0.0236439		1863.74	-38.549	349.679	1863.74	-14.7226	699.877	1863.74	85.6412	1100.61	1863.74	-19.6262	1399.86
		1865.31	41.1719	0.343099		1865.31	100.144	350.835	1865.31	79.4927	700.662	1865.31	15.7493	1100.11	1865.31	-8.40426	1399.94
		1866.88	-7.98239	-0.0665199		1866.88	-26.7408	349.777	1866.88	-2.84026	699.976	1866.88	-51.0443	1099.64	1866.88	209.022	1401.49
		1868.45	2.22256	0.0185213		1868.45	124.479	351.037	1868.45	-107.115	699.107	1868.45	82.1732	1100.59	1868.45	-32.9633	1399.76
		1870.01	98.3996	0.819997		1870.01	-30.6065	349.745	1870.01	-3.55549	699.97	1870.01	59.1577	1100.42	1870.01	61.0047	1400.44
		1871.58	-46.1611	-0.384676		1871.58	37.78	350.315	1871.58	-15.6882	699.869	1871.58	14.2306	1100.1	1871.58	54.8818	1400.39
		1873.15	12.5036	0.104196		1873.15	203.15	351.693	1873.15	-21.5853	699.82	1873.15	-18.1813	1099.87	1873.15	31.543	1400.23
		1874.71	36.7772	0.306477		1874.71	201.217	351.677	1874.71	0.640541	700.005	1874.71	-45.9083	1099.67	1874.71	12.8478	1400.09
		1876.28	-12.4712	-0.103927		1876.28	-21.31	349.822	1876.28	-45.9849	699.617	1876.28	65.5913	1100.47	1876.28	6.62038	1400.05
		1877.85	-57.0513	-0.475427		1877.85	-95.2946	349.206	1877.85	74.7688	700.623	1877.85	-24.7035	1099.82	1877.85	1.91856	1400.01
		1879.41	-9.31749	-0.0776457		1879.41	-9.68808	349.919	1879.41	-17.2993	699.856	1879.41	155.724	1101.11	1879.41	-88.8982	1399.37
		1880.98	21.2154	0.176795		1880.98	65.0017	350.542	1880.98	42.4214	700.354	1880.98	-66.0431	1099.53	1880.98	-71.7495	1399.49
		1882.54	45.4897	0.37908		1882.54	-120.21	348.998	1882.54	-73.228	699.39	1882.54	8.00381	1100.06	1882.54	-21.7774	1399.84
		1884.11	2.43476	0.0202896		1884.11	35.898	350.299	1884.11	13.0773	700.109	1884.11	17.9048	1100.13	1884.11	-9.37156	1399.93
		1885.67	-18.7138	-0.155948		1885.67	-91.4446	349.238	1885.67	-8.68325	699.928	1885.67	90.4749	1100.65	1885.67	26.5009	1400.19
		1887.24	113.656	0.947137		1887.24	-23.0177	349.808	1887.24	2.42293	700.02	1887.24	23.6553	1100.17	1887.24	-0.307421	1400
		1888.8	45.5082	0.379235		1888.8	-45.4376	349.621	1888.8	40.1614	700.335	1888.8	-14.9542	1099.89	1888.8	-58.4666	1399.58
		1890.37	-17.9738	-0.149782		1890.37	157.798	351.315	1890.37	-99.2263	699.173	1890.37	-105.304	1099.25	1890.37	90.1757	1400.64
		1891.93	39.2247	0.326872		1891.93	135.391	351.128	1891.93	-147.759	698.769	1891.93	-7.54419	1099.95	1891.93	-49.5608	1399.65
		1893.49	49.4049	0.411708		1893.49	-26.5781	349.779	1893.49	-14.4526	699.88	1893.49	-96.3129	1099.31	1893.49	9.74829	1400.07
		1895.05	28.217	0.235142		1895.05	29.3512	350.245	1895.05	-59.9097	699.501	1895.05	6.20861	1100.04	1895.05	17.2732	1400.12
		1896.62	60.3569	0.502974		1896.62	104.158	350.868	1896.62	-81.8518	699.318	1896.62	-261.361	1098.13	1896.62	4.44622	1400.03
		1898.18	-20.4584	-0.170487		1898.18	-83.0355	349.308	1898.18	57.7605	700.481	1898.18	-75.6242	1099.46	1898.18	156.297	1401.12
		1899.74	-4.01706	-0.0334755		1899.74	7.44569	350.062	1899.74	-61.5149	699.487	1899.74	-202.07	1098.56	1899.74	141.851	1401.01
		1901.3	32.8364	0.273637		1901.3	66.588	350.555	1901.3	-249.906	697.917	1901.3	-53.8566	1099.62	1901.3	42.6513	1400.3
		1902.86	-40.1887	-0.334906		1902.86	-106.59	349.112	1902.86	30.9987	700.258	1902.86	-68.829	1099.51	1902.86	21.8871	1400.16
		1904.42	28.0723	0.233936		1904.42	51.4734	350.429	1904.42	-124.517	698.962	1904.42	-91.6373	1099.35	1904.42	37.2098	1400.27
		1905.98	3.69853	0.0308211		1905.98	77.6766	350.647	1905.98	-75.9477	699.367	1905.98	99.159	1100.71	1905.98	2.26628	1400.02
		1907.54	-45.8208	-0.38184		1907.54	-42.1978	349.648	1907.54	-83.9272	699.301	1907.54	-72.8096	1099.48	1907.54	31.6983	1400.23
		1909.1	-1.0876	-0.00906329		1909.1	-28.5533	349.762	1909.1	41.6348	700.347	1909.1	9.72397	1100.07	1909.1	26.5921	1400.19
		1910.66	-67.9174	-0.565978		1910.66	106.086	350.884	1910.66	-41.7919	699.652	1910.66	-27.1365	1099.81	1910.66	-44.5629	1399.68
		1912.22	14.5511	0.121259		1912.22	22.3185	350.186	1912.22	-16.801	699.86	1912.22	-125.269	1099.11	1912.22	-107.869	1399.23
		1913.78	1.15205	0.00960045		1913.78	-83.4904	349.304	1913.78	-12.2544	699.898	1913.78	-91.3554	1099.35	1913.78	-64.3052	1399.54
		1915.34	22.3411	0.186176		1915.34	21.3722	350.178	1915.34	14.2921	700.119	1915.34	-266.539	1098.1	1915.34	-61.6176	1399.56
		1916.9	-14.6548	-0.122123		1916.9	-45.1518	349.624	1916.9	-4.77754	699.96	1916.9	-125.636	1099.1	1916.9	-117.129	1399.16
		1918.45	63.175	0.526459		1918.45	-17.2924	349.856	1918.45	-66.3305	699.447	1918.45	-47.553	1099.66	1918.45	44.4489	1400.32
		1920.01	56.0675	0.467229		1920.01	-41.357	349.655	1920.01	-27.2377	699.773	1920.01	-79.5668	1099.43	1920.01	-138.525	1399.01
		1921.57	12.7644	0.10637		1921.57	76.2322	350.635	1921.57	24.4607	700.204	1921.57	-40.7263	1099.71	1921.57	177.334	1401.27
		1923.12	-24.2595	-0.202163		1923.12	-39.0868	349.674	1923.12	-56.0568	699.533	1923.12	-14.4317	1099.9	1923.12	43.133	1400.31
		1924.68	74.1013	0.617511		1924.68	-93.0429	349.225	1924.68	19.246	700.16	1924.68	29.2239	1100.21	1924.68	23.8061	1400.17
		1926.24	41.8005	0.348338		1926.24	-66.7003	349.444	1926.24	-1.49235	699.988	1926.24	-57.7732	1099.59	1926.24	128.875	1400.92
		1927.79	-36.1853	-0.301544		1927.79	203.815	351.698	1927.79	-8.06252	699.933	1927.79	-47.1005	1099.66	1927.79	232.443	1401.66
		1929.35	-73.2457	-0.610381		1929.35	66.4113	350.553	1929.35	87.7391	700.731	1929.35	141.61	1101.01	1929.35	132.801	1400.95
		1930.9	29.9219	0.249349		1930.9	9.34146	350.078	1930.9	-62.2281	699.481	1930.9	-36.6887	1099.74	1930.9	45.7578	1400.33
		1932.46	33.8439	0.282033		1932.46	2.69355	350.022	1932.46	30.4414	700.254	1932.46	-5.41281	1099.96	1932.46	147.807	1401.06
		1934.01	143.385	1.19488		1934.01	66.9918	350.558	1934.01	-12.4287	699.896	1934.01	76.3552	1100.55	1934.01	41.8246	1400.3
		1935.57	2.28212	0.0190177		1935.57	-8.99386	349.925	1935.57	26.6612	700.222	1935.57	104.587	1100.75	1935.57	96.6285	1400.69
		1937.12	116.601	0.971678		1937.12	42.7591	350.356	1937.12	-43.0415	699.641	1937.12	-20.0835	1099.86	1937.12	187.764	1401.34
		1938.68	70.0794	0.583995		1938.68	-33.2322	349.723	1938.68	-62.3212	699.481	1938.68	-50.1451	1099.64	1938.68	58.0915	1400.41
		1940.23	92.9618	0.774682		1940.23	-19.2943	349.839	1940.23	-27.9632	699.767	1940.23	35.0061	1100.25	1940.23	-44.773	1399.68
		1941.78	49.5816	0.41318		1941.78	-10.068	349.916	1941.78	-113.525	699.054	1941.78	5.04032	1100.04	1941.78	51.1574	1400.37
		1943.33	-90.0892	-0.750743		1943.33	-70.2653	349.414	1943.33	-71.2874	699.406	1943.33	-29.632	1099.79	1943.33	136.093	1400.97
		1944.89	16.4513	0.137094		1944.89	8.4504	350.07	1944.89	16.7414	700.14	1944.89	74.6414	1100.53	1944.89	-48.8661	1399.65
		1946.44	23.5697	0.196414		1946.44	-53.2904	349.556	1946.44	-72.0285	699.4	1946.44	98.491	1100.7	1946.44	381.935	1402.73
		1947.99	57.5388	0.47949		1947.99	61.8236	350.515	1947.99	-13.9822	699.883	1947.99	-76.6129	1099.45	1947.99	296.479	1402.12
		1949.54	-11.1437	-0.0928642		1949.54	-15.6868	349.869	1949.54	26.7211	700.223	1949.54	79.9875	1100.57	1949.54	154.171	1401.1
		1951.09	86.0417	0.717015		1951.09	83.7439	350.698	1951.09	20.0385	700.167	1951.09	66.065	1100.47	1951.09	281.992	1402.01
		1952.64	88.457	0.737141		1952.64	17.3122	350.144	1952.64	14.9295	700.124	1952.64	-17.3491	1099.88	1952.64	145.986	1401.04
		1954.19	24.4945	0.204121		1954.19	274.893	352.291	1954.19	57.2315	700.477	1954.19	8.3072	1100.06	1954.19	352.93	1402.52
		1955.74	-48.9745	-0.40812		1955.74	52.0118	350.433	1955.74	4.69461	700.039	1955.74	-41.8632	1099.7	1955.74	253.291	1401.81
		1957.29	-89.2591	-0.743826		1957.29	53.6145	350.447	1957.29	130.825	701.09	1957.29	31.3457	1100.22	1957.29	128.367	1400.92
		1958.84	-12.52	-0.104334		1958.84	93.2003	350.777	1958.84	130.482	701.087	1958.84	46.1149	1100.33	1958.84	394.06	1402.81
		1960.39	61.0888	0.509073		1960.39	-61.7586	349.485	1960.39	58.9387	700.491	1960.39	89.3942	1100.64	1960.39	337.158	1402.41
		1961.94	65.1247	0.542706		1961.94	90.2268	350.752	1961.94	-56.9078	699.526	1961.94	18.8571	1100.13	1961.94	217.036	1401.55
		1963.49	108.728	0.906068		1963.49	-34.6561	349.711	1963.49	100.959	700.841	1963.49	-53.2593	1099.62	1963.49	361.145	1402.58
		1965.04	-17.0081	-0.141735		1965.04	-4.44346	349.963	1965.04	11.9676	700.1	1965.04	-104.778	1099.25	1965.04	468.939	1403.35
		1966.58	94.6894	0.789078		1966.58	-21.6658	349.819	1966.58	49.6072	700.413	1966.58	65.3931	1100.47	1966.58	298.204	1402.13
		1968.13	16.417	0.136809		1968.13	-23.0484	349.808	1968.13	76.1656	700.635	1968.13	-54.1106	1099.61	1968.13	445.686	1403.18
		1969.68	34.7364	0.28947		1969.68	42.1374	350.351	1969.68	-28.7067	699.761	1969.68	84.5684	1100.6	1969.68	300.288	1402.14
		1971.23	137.03	1.14192		1971.23	110.55	350.921	1971.23	18.4582	700.154	1971.23	125.14	1100.89	1971.23	335.46	1402.4
		1972.77	-20.4789	-0.170657		1972.77	30.0829	350.251	1972.77	87.8282	700.732	1972.77	107.156	1100.77	1972.77	396.037	1402.83
		1974.32	127.82	1.06517		1974.32	81.1532	350.676	1974.32	62.1417	700.518	1974.32	65.4464	1100.47	1974.32	383.778	1402.74
		1975.87	14.6477	0.122064		1975.87	0.731439	350.006	1975.87	1.59071	700.013	1975.87	-20.5922	1099.85	1975.87	241.606	1401.73
		1977.41	36.1996	0.301663		1977.41	134.346	351.12	1977.41	-39.9551	699.667	1977.41	5.95544	1100.04	1977.41	322.965	1402.31
		1978.96	-5.66547	-0.0472122		1978.96	-52.2917	349.564	1978.96	40.5764	700.338	1978.96	42.0682	1100.3	1978.96	535.99	1403.83
		1980.5	34.9416	0.29118		1980.5	-50.2076	349.582	1980.5	156.055	701.3	1980.5	56.0629	1100.4	1980.5	282.867	1402.02
		1982.05	31.1549	0.259624		1982.05	82.0004	350.683	1982.05	65.3528	700.545	1982.05	19.3552	1100.14	1982.05	445.327	1403.18
		1983.59	76.5682	0.638068		1983.59	-1.47941	349.988	1983.59	14.3033	700.119	1983.59	81.0842	1100.58	1983.59	419.109	1402.99
		1985.13	-17.6559	-0.147133		1985.13	45.1667	350.376	1985.13	94.9521	700.791	1985.13	19.089	1100.14	1985.13	581.762	1404.16
		1986.68	111.917	0.932641		1986.68	6.16939	350.051	1986.68	10.5669	700.088	1986.68	19.0515	1100.14	1986.68	508.039	1403.63
		1988.22	4.98287	0.0415239		1988.22	91.0373	350.759	1988.22	130.971	701.091	1988.22	117.512	1100.84	1988.22	402.583	1402.88
		1989.76	93.3446	0.777871		1989.76	39.4093	350.328	1989.76	67.2206	700.56	1989.76	198.604	1101.42	1989.76	546.461	1403.9
		1991.31	57.8599	0.482166		1991.31	44.982	350.375	1991.31	3.45341	700.029	1991.31	100.304	1100.72	1991.31	485.551	1403.47
		1992.85	-42.7653	-0.356377		1992.85	12.4705	350.104	1992.85	66.7658	700.556	1992.85	70.3379	1100.5	1992.85	586.719	1404.19
		1994.39	26.6045	0.221704		1994.39	21.3032	350.178	1994.39	44.3071	700.369	1994.39	-16.7834	1099.88	1994.39	508.426	1403.63
		1995.93	65.8193	0.548494		1995.93	168.472	351.404	1995.93	123.583	701.03	1995.93	53.4824	1100.38	1995.93	414.294	1402.96
		1997.47	22.3986	0.186655		1997.47	-51.4679	349.571	1997.47	31.2183	700.26	1997.47	154.044	1101.1	1997.47	585.66	1404.18
		1999.02	12.3614	0.103012		1999.02	130.816	351.09	1999.02	-143.852	698.801	1999.02	-53.7511	1099.62	1999.02	738.075	1405.27
		2000.56	116.835	0.973626		2000.56	93.7546	350.781	2000.56	108.816	700.907	2000.56	10.3783	1100.07	2000.56	691.825	1404.94
		2002.1	-71.3162	-0.594301		2002.1	-8.49183	349.929	2002.1	-45.6058	699.62	2002.1	-11.2971	1099.92	2002.1	581.993	1404.16
		2003.64	15.7064	0.130887		2003.64	73.8198	350.615	2003.64	-53.7071	699.552	2003.64	65.7238	1100.47	2003.64	644.006	1404.6
		2005.18	86.8671	0.723893		2005.18	59.1599	350.493	2005.18	-25.1835	699.79	2005.18	-19.4564	1099.86	2005.18	507.226	1403.62
		2006.72	-20.1926	-0.168272		2006.72	27.0346	350.225	2006.72	-53.9319	699.551	2006.72	83.2062	1100.59	2006.72	763.589	1405.45
		2008.26	-17.4425	-0.145354		2008.26	61.7905	350.515	2008.26	-57.2192	699.523	2008.26	28.358	1100.2	2008.26	841.798	1406.01
		2009.8	33.0937	0.275781		2009.8	13.8283	350.115	2009.8	44.6123	700.372	2009.8	91.3976	1100.65	2009.8	797.531	1405.7
		2011.33	-69.2232	-0.57686		2011.33	56.6916	350.472	2011.33	-70.0776	699.416	2011.33	-38.1601	1099.73	2011.33	705.568	1405.04
		2012.87	-36.173	-0.301441		2012.87	-83.5803	349.303	2012.87	-58.9703	699.509	2012.87	-104.001	1099.26	2012.87	873.258	1406.24
		2014.41	106.842	0.890353		2014.41	59.7588	350.498	2014.41	28.6494	700.239	2014.41	10.2513	1100.07	2014.41	706.534	1405.05
		2015.95	33.1993	0.276661		2015.95	-35.8452	349.701	2015.95	66.9083	700.558	2015.95	-9.25681	1099.93	2015.95	759.703	1405.43
		2017.49	-45.2386	-0.376988		2017.49	86.9467	350.725	2017.49	28.7075	700.239	2017.49	97.2297	1100.69	2017.49	814.592	1405.82
		2019.02	11.8157	0.098464		2019.02	173.175	351.443	2019.02	118.05	700.984	2019.02	90.6376	1100.65	2019.02	965.234	1406.89
		2020.56	13.0977	0.109148		2020.56	45.821	350.382	2020.56	-14.1964	699.882	2020.56	-40.2632	1099.71	2020.56	781.157	1405.58
		2022.1	-41.423	-0.345192		2022.1	-63.9699	349.467	2022.1	16.2166	700.135	2022.1	84.0489	1100.6	2022.1	860.269	1406.14
		2023.63	26.8768	0.223974		2023.63	-50.9341	349.576	2023.63	5.17336	700.043	2023.63	149.445	1101.07	2023.63	843.753	1406.03
		2025.17	12.2544	0.10212		2025.17	100.991	350.842	2025.17	-29.7727	699.752	2025.17	-56.2891	1099.6	2025.17	910.308	1406.5
		2026.71	56.685	0.472375		2026.71	98.2201	350.819	2026.71	31.0273	700.259	2026.71	31.5892	1100.23	2026.71	937.049	1406.69
		2028.24	74.0169	0.616807		2028.24	-22.5968	349.812	2028.24	12.0789	700.101	2028.24	81.28	1100.58	2028.24	1026.16	1407.33
		2029.77	-34.7508	-0.28959		2029.77	-46.0018	349.617	2029.77	20.2999	700.169	2029.77	0.16353	1100	2029.77	764.193	1405.46
		2031.31	19.3279	0.161066		2031.31	155.782	351.298	2031.31	116.361	700.97	2031.31	-29.8298	1099.79	2031.31	1029.13	1407.35
		2032.84	-81.4816	-0.679013		2032.84	-49.5703	349.587	2032.84	14.4356	700.12	2032.84	64.8179	1100.46	2032.84	973.239	1406.95
		2034.38	-59.3056	-0.494213		2034.38	48.5932	350.405	2034.38	123.377	701.028	2034.38	14.2179	1100.1	2034.38	992.52	1407.09
		2035.91	60.3632	0.503027		2035.91	57.3787	350.478	2035.91	75.8005	700.632	2035.91	104.279	1100.74	2035.91	995.92	1407.11
		2037.44	-2.09263	-0.0174386		2037.44	-58.4263	349.513	2037.44	-26.1071	699.782	2037.44	200.844	1101.43	2037.44	1135.26	1408.11
		2038.98	-51.7697	-0.431414		2038.98	-15.9674	349.867	2038.98	36.6133	700.305	2038.98	-36.5607	1099.74	2038.98	1134.07	1408.1
		2040.51	15.2625	0.127187		2040.51	63.3441	350.528	2040.51	105.781	700.882	2040.51	87.3428	1100.62	2040.51	1198.54	1408.56
		2042.04	-12.01	-0.100083		2042.04	43.6045	350.363	2042.04	31.0819	700.259	2042.04	-81.2696	1099.42	2042.04	1143.19	1408.17
		2043.57	-12.0828	-0.10069		2043.57	59.1241	350.493	2043.57	154.727	701.289	2043.57	-78.7204	1099.44	2043.57	1227.09	1408.76
		2045.11	-20.1376	-0.167813		2045.11	-46.8701	349.609	2045.11	-57.5056	699.521	2045.11	-77.6944	1099.45	2045.11	1192.73	1408.52
		2046.64	77.4293	0.645244		2046.64	-77.6378	349.353	2046.64	-8.97676	699.925	2046.64	-18.9891	1099.86	2046.64	956.85	1406.83
		2048.17	34.2143	0.285119		2048.17	8.48035	350.071	2048.17	156.433	701.304	2048.17	44.6175	1100.32	2048.17	1231.51	1408.8
		2049.7	-29.8105	-0.248421		2049.7	61.083	350.509	2049.7	-22.226	699.815	2049.7	-144.594	1098.97	2049.7	1248.66	1408.92
		2051.23	18.2329	0.151941		2051.23	36.9214	350.308	2051.23	31.2314	700.26	2051.23	-52.0147	1099.63	2051.23	1269.12	1409.07
		2052.76	58.3096	0.485913		2052.76	-65.6385	349.453	2052.76	-54.5696	699.545	2052.76	152.792	1101.09	2052.76	1297.72	1409.27
		2054.29	-28.1205	-0.234337		2054.29	-52.8607	349.559	2054.29	66.238	700.552	2054.29	24.5823	1100.18	2054.29	1299.18	1409.28
		2055.82	0.784897	0.00654081		2055.82	54.5271	350.454	2055.82	65.382	700.545	2055.82	91.8641	1100.66	2055.82	1353.64	1409.67
		2057.35	58.5636	0.48803		2057.35	-19.0444	349.841	2057.35	170.316	701.419	2057.35	-2.59257	1099.98	2057.35	1509.18	1410.78
		2058.88	-24.6532	-0.205444		2058.88	34.0531	350.284	2058.88	143.915	701.199	2058.88	5.57725	1100.04	2058.88	1554.33	1411.1
		2060.41	63.639	0.530325		2060.41	-37.8105	349.685	2060.41	-114.921	699.042	2060.41	-108.017	1099.23	2060.41	1298.2	1409.27
		2061.94	-8.35244	-0.0696037		2061.94	134.082	351.117	2061.94	115.204	700.96	2061.94	-32.3788	1099.77	2061.94	1550.35	1411.07
		2063.46	3.0413	0.0253442		2063.46	39.9119	350.333	2063.46	93.6862	700.781	2063.46	89.8882	1100.64	2063.46	1502.84	1410.73
		2064.99	44.9358	0.374465		2064.99	171.945	351.433	2064.99	89.8388	700.749	2064.99	-103.713	1099.26	2064.99	1262.94	1409.02
		2066.52	13.0654	0.108878		2066.52	183.776	351.531	2066.52	100.464	700.837	2066.52	123.03	1100.88	2066.52	1420.94	1410.15
		2068.04	35.761	0.298008		2068.04	62.4944	350.521	2068.04	96.6857	700.806	2068.04	22.5868	1100.16	2068.04	1505.29	1410.75
		2069.57	31.1997	0.259997		2069.57	87.2927	350.727	2069.57	19.111	700.159	2069.57	-55.3478	1099.6	2069.57	1572.14	1411.23
		2071.1	36.291	0.302425		2071.1	176.402	351.47	2071.1	-3.86461	699.968	2071.1	-24.059	1099.83	2071.1	1594.2	1411.39
		2072.62	-104.715	-0.872629		2072.62	39.2077	350.327	2072.62	-12.3744	699.897	2072.62	10.5212	1100.08	2072.62	1531.27	1410.94
		2074.15	-51.4302	-0.428585		2074.15	14.4649	350.121	2074.15	126.915	701.058	2074.15	-84.88	1099.39	2074.15	1476.48	1410.55
		2075.68	-41.4742	-0.345619		2075.68	100.624	350.839	2075.68	131.366	701.095	2075.68	149.059	1101.06	2075.68	1545.47	1411.04
		2077.2	48.8387	0.40699		2077.2	93.7069	350.781	2077.2	-61.7625	699.485	2077.2	26.4931	1100.19	2077.2	1788.12	1412.77
		2078.73	73.3224	0.61102		2078.73	136.679	351.139	2078.73	-2.63409	699.978	2078.73	275.173	1101.97	2078.73	1841.37	1413.15
		2080.25	20.687	0.172392		2080.25	39.9204	350.333	2080.25	40.4967	700.337	2080.25	-9.58432	1099.93	2080.25	1734.06	1412.39
		2081.78	61.2919	0.510766		2081.78	103.951	350.866	2081.78	215.499	701.796	2081.78	9.45631	1100.07	2081.78	1676.63	1411.98
		2083.3	-39.5658	-0.329715		2083.3	261.36	352.178	2083.3	12.7503	700.106	2083.3	73.6194	1100.53	2083.3	1768.87	1412.63
		2084.82	47.7276	0.39773		2084.82	163.19	351.36	2084.82	99.4535	700.829	2084.82	76.7741	1100.55	2084.82	1740.64	1412.43
		2086.35	-8.09106	-0.0674255		2086.35	121.359	351.011	2086.35	105.801	700.882	2086.35	-67.9837	1099.51	2086.35	1923.26	1413.74
		2087.87	2.0556	0.01713		2087.87	-31.4284	349.738	2087.87	99.3205	700.828	2087.87	232.962	1101.66	2087.87	2007.93	1414.34
		2089.39	18.6665	0.155554		2089.39	115.14	350.96	2089.39	76.7979	700.64	2089.39	62.6003	1100.45	2089.39	1957.6	1413.98
		2090.91	43.3512	0.36126		2090.91	78.3386	350.653	2090.91	43.028	700.359	2090.91	-54.6432	1099.61	2090.91	1706.16	1412.19
		2092.44	72.8989	0.607491		2092.44	326.574	352.721	2092.44	112.335	700.936	2092.44	3.64119	1100.03	2092.44	2163.13	1415.45
		2093.96	102.48	0.853997		2093.96	238.442	351.987	2093.96	180.103	701.501	2093.96	100.677	1100.72	2093.96	1990.8	1414.22
		2095.48	-17.6921	-0.147434		2095.48	106.869	350.891	2095.48	122.314	701.019	2095.48	175.284	1101.25	2095.48	2055.29	1414.68
		2097	-25.1265	-0.209388		2097	152.525	351.271	2097	296.518	702.471	2097	50.2474	1100.36	2097	1949.18	1413.92
		2098.52	-6.76249	-0.0563541		2098.52	148.33	351.236	2098.52	119.583	700.997	2098.52	36.4176	1100.26	2098.52	2096.12	1414.97
		2100.04	42.2525	0.352104		2100.04	274.766	352.29	2100.04	76.3934	700.637	2100.04	153.212	1101.09	2100.04	2296.45	1416.4
		2101.56	5.87549	0.0489625		2101.56	209.505	351.746	2101.56	139.605	701.163	2101.56	171.799	1101.23	2101.56	2081.11	1414.87
		2103.08	-32.1051	-0.267542		2103.08	379.697	353.164	2103.08	43.2866	700.361	2103.08	46.9946	1100.34	2103.08	2301.13	1416.44
		2104.6	-18.4771	-0.153976		2104.6	350.083	352.917	2104.6	203.373	701.695	2104.6	-1.98948	1099.99	2104.6	2126.3	1415.19
		2106.12	158.081	1.31734		2106.12	183.442	351.529	2106.12	137.764	701.148	2106.12	160.379	1101.15	2106.12	2085.4	1414.9
		2107.64	-28.2437	-0.235364		2107.64	218.469	351.821	2107.64	214.138	701.784	2107.64	119.626	1100.85	2107.64	2086.56	1414.9
		2109.16	101.637	0.846974		2109.16	232.628	351.939	2109.16	137.313	701.144	2109.16	130.582	1100.93	2109.16	2234.71	1415.96
		2110.68	49.2208	0.410173		2110.68	296.897	352.474	2110.68	380.04	703.167	2110.68	64.1484	1100.46	2110.68	2163.55	1415.45
		2112.2	-90.3604	-0.753004		2112.2	195.021	351.625	2112.2	259.728	702.164	2112.2	126.914	1100.91	2112.2	2260.4	1416.15
		2113.71	36.4231	0.303526		2113.71	377.348	353.145	2113.71	271.805	702.265	2113.71	75.1537	1100.54	2113.71	2535.02	1418.11
		2115.23	61.5435	0.512862		2115.23	311.142	352.593	2115.23	193.502	701.613	2115.23	133.265	1100.95	2115.23	2422.33	1417.3
		2116.75	67.3134	0.560945		2116.75	228.842	351.907	2116.75	78.0653	700.651	2116.75	186.635	1101.33	2116.75	2424.4	1417.32
		2118.26	5.25739	0.0438116		2118.26	421.243	353.51	2118.26	190.431	701.587	2118.26	152.877	1101.09	2118.26	2562.34	1418.3
		2119.78	99.9347	0.832789		2119.78	427.975	353.566	2119.78	333.58	702.78	2119.78	157.96	1101.13	2119.78	2461.31	1417.58
		2121.3	62.1472	0.517894		2121.3	413.792	353.448	2121.3	184.317	701.536	2121.3	226.164	1101.62	2121.3	2426.66	1417.33
		2122.81	50.2304	0.418587		2122.81	351.195	352.927	2122.81	159.515	701.329	2122.81	241.131	1101.72	2122.81	2401.84	1417.16
		2124.33	51.2658	0.427215		2124.33	236.918	351.974	2124.33	183.257	701.527	2124.33	68.6311	1100.49	2124.33	2404.63	1417.18
		2125.84	26.4491	0.220409		2125.84	450.967	353.758	2125.84	284.682	702.372	2125.84	182.382	1101.3	2125.84	2402.72	1417.16
		2127.36	76.0495	0.633746		2127.36	252.726	352.106	2127.36	234.154	701.951	2127.36	61.7209	1100.44	2127.36	2552.99	1418.24
		2128.87	44.8022	0.373352		2128.87	399.099	353.326	2128.87	329.271	702.744	2128.87	65.6719	1100.47	2128.87	2540.09	1418.14
		2130.39	58.8715	0.490596		2130.39	391.882	353.266	2130.39	165.56	701.38	2130.39	51.8976	1100.37	2130.39	2414.04	1417.24
		2131.9	-92.116	-0.767634		2131.9	371.811	353.098	2131.9	344.965	702.875	2131.9	156.355	1101.12	2131.9	2560	1418.29
		2133.42	28.8195	0.240162		2133.42	439.234	353.66	2133.42	147.307	701.228	2133.42	179.994	1101.29	2133.42	2587.99	1418.49
		2134.93	-23.423	-0.195192		2134.93	296.283	352.469	2134.93	281.547	702.346	2134.93	101.715	1100.73	2134.93	2434.8	1417.39
		2136.44	45.7981	0.381651		2136.44	360.663	353.006	2136.44	79.0507	700.659	2136.44	266.414	1101.9	2136.44	2749.73	1419.64
		2137.96	61.6145	0.513454		2137.96	405.71	353.381	2137.96	122.725	701.023	2137.96	123.487	1100.88	2137.96	2601.66	1418.58
		2139.47	64.4996	0.537497		2139.47	347.182	352.893	2139.47	252.347	702.103	2139.47	150.705	1101.08	2139.47	2699.96	1419.29
		2140.98	-50.8874	-0.424061		2140.98	419.968	353.5	2140.98	216.775	701.806	2140.98	46.7463	1100.33	2140.98	2631.51	1418.8
		2142.49	-41.4961	-0.345801		2142.49	382.665	353.189	2142.49	213.668	701.781	2142.49	161.64	1101.15	2142.49	2697.73	1419.27
		2144	65.1888	0.54324		2144	441.082	353.676	2144	161.978	701.35	2144	153.453	1101.1	2144	2726.84	1419.48
		2145.51	53.5739	0.446449		2145.51	390.98	353.258	2145.51	238.425	701.987	2145.51	179.398	1101.28	2145.51	2499.93	1417.86
		2147.03	72.7892	0.606577		2147.03	496.63	354.139	2147.03	269.537	702.246	2147.03	166.504	1101.19	2147.03	2663.91	1419.03
		2148.54	15.7948	0.131624		2148.54	467.776	353.898	2148.54	99.5719	700.83	2148.54	101.774	1100.73	2148.54	2672.39	1419.09
		2150.05	-11.9953	-0.0999611		2150.05	262.159	352.185	2150.05	268.692	702.239	2150.05	27.3673	1100.2	2150.05	2755.67	1419.68
		2151.56	-43.0202	-0.358502		2151.56	463.864	353.866	2151.56	269.168	702.243	2151.56	9.80576	1100.07	2151.56	2944.62	1421.03
		2153.07	-17.2272	-0.14356		2153.07	242.109	352.018	2153.07	117.124	700.976	2153.07	136.771	1100.98	2153.07	2624.13	1418.74
		2154.58	-20.6235	-0.171862		2154.58	351.533	352.929	2154.58	294.63	702.455	2154.58	111.262	1100.79	2154.58	2730.63	1419.5
		2156.09	5.22857	0.0435714		2156.09	370.159	353.085	2156.09	176.737	701.473	2156.09	40.3545	1100.29	2156.09	2696.06	1419.26
		2157.59	73.3407	0.611172		2157.59	507.448	354.229	2157.59	63.733	700.531	2157.59	166.016	1101.19	2157.59	2593.43	1418.52
		2159.1	14.797	0.123308		2159.1	438.58	353.655	2159.1	225.266	701.877	2159.1	41.6436	1100.3	2159.1	2702.08	1419.3
		2160.61	24.49	0.204083		2160.61	442.878	353.691	2160.61	229.308	701.911	2160.61	148.008	1101.06	2160.61	2602.95	1418.59
		2162.12	-30.7939	-0.256616		2162.12	253.889	352.116	2162.12	313.046	702.609	2162.12	142.365	1101.02	2162.12	2703.82	1419.31
		2163.63	52.0817	0.434014		2163.63	333.106	352.776	2163.63	172.565	701.438	2163.63	1.8861	1100.01	2163.63	2746.38	1419.62
		2165.13	109.002	0.908349		2165.13	389.692	353.247	2165.13	235.311	701.961	2165.13	115.047	1100.82	2165.13	2797.25	1419.98
		2166.64	48.8879	0.407399		2166.64	433.372	353.611	2166.64	125.762	701.048	2166.64	199.056	1101.42	2166.64	2562.09	1418.3
		2168.15	99.3676	0.828064		2168.15	553.607	354.613	2168.15	294.352	702.453	2168.15	281.552	1102.01	2168.15	2741.73	1419.58
		2169.65	-33.9331	-0.282776		2169.65	416.949	353.475	2169.65	354.064	702.951	2169.65	240.519	1101.72	2169.65	2832.12	1420.23
		2171.16	60.5238	0.504365		2171.16	444.665	353.706	2171.16	272.311	702.269	2171.16	137.72	1100.98	2171.16	2680.28	1419.14
		2172.67	24.8483	0.207069		2172.67	488.754	354.073	2172.67	213.363	701.778	2172.67	142.362	1101.02	2172.67	2860.52	1420.43
		2174.17	80.3333	0.669444		2174.17	464.592	353.872	2174.17	287.931	702.399	2174.17	181.267	1101.29	2174.17	2980.77	1421.29
		2175.68	158.654	1.32211		2175.68	490.972	354.091	2175.68	323.503	702.696	2175.68	67.2185	1100.48	2175.68	2860.26	1420.43
		2177.18	67.6744	0.563953		2177.18	519.08	354.326	2177.18	277.725	702.314	2177.18	184.428	1101.32	2177.18	2868.5	1420.49
		2178.69	137.923	1.14936		2178.69	622.215	355.185	2178.69	376.951	703.141	2178.69	205.668	1101.47	2178.69	2909.48	1420.78
		2180.19	250.576	2.08814		2180.19	565.834	354.715	2180.19	362.24	703.019	2180.19	456.686	1103.26	2180.19	3041.86	1421.73
		2181.69	171.029	1.42524		2181.69	573.063	354.776	2181.69	440.454	703.67	2181.69	109.894	1100.78	2181.69	2568.32	1418.35
		2183.2	216.957	1.80798		2183.2	735.208	356.127	2183.2	350.897	702.924	2183.2	150.905	1101.08	2183.2	3082.35	1422.02
		2184.7	225.434	1.87862		2184.7	336.77	352.806	2184.7	249.949	702.083	2184.7	392.5	1102.8	2184.7	2894.19	1420.67
		2186.2	379.039	3.15865		2186.2	530.091	354.417	2186.2	473.47	703.946	2186.2	247.869	1101.77	2186.2	2847.97	1420.34
		2187.71	113.634	0.946949		2187.71	619.208	355.16	2187.71	403.604	703.363	2187.71	280.993	1102.01	2187.71	3010.6	1421.5
		2189.21	206.97	1.72475		2189.21	485.002	354.042	2189.21	425.112	703.543	2189.21	263.643	1101.88	2189.21	2618.91	1418.71
		2190.71	68.7097	0.572581		2190.71	551.488	354.596	2190.71	296.6	702.472	2190.71	231.673	1101.65	2190.71	2794.93	1419.96
		2192.21	122.954	1.02461		2192.21	476.13	353.968	2192.21	321.474	702.679	2192.21	142.651	1101.02	2192.21	2858.59	1420.42
		2193.71	84.2138	0.701782		2193.71	469.376	353.911	2193.71	93.4491	700.779	2193.71	254.402	1101.82	2193.71	2656.41	1418.97
		2195.21	7.93379	0.0661149		2195.21	379.46	353.162	2195.21	276.751	702.306	2195.21	292.813	1102.09	2195.21	2824.86	1420.18
		2196.72	72.0534	0.600445		2196.72	552.453	354.604	2196.72	277.316	702.311	2196.72	261.101	1101.87	2196.72	2529.84	1418.07
		2198.22	90.4944	0.75412		2198.22	369.61	353.08	2198.22	256.717	702.139	2198.22	216.382	1101.55	2198.22	2594.13	1418.53
		2199.72	35.4607	0.295506		2199.72	492.217	354.102	2199.72	226.368	701.886	2199.72	63.9112	1100.46	2199.72	2475.66	1417.68
		2201.22	73.5442	0.612868		2201.22	376.441	353.137	2201.22	205.864	701.716	2201.22	156.498	1101.12	2201.22	2661.16	1419.01
		2202.72	75.7137	0.630947		2202.72	396.33	353.303	2202.72	138.024	701.15	2202.72	100.496	1100.72	2202.72	2547.88	1418.2
		2204.22	-36.5015	-0.304179		2204.22	563.403	354.695	2204.22	119.243	700.994	2204.22	87.0291	1100.62	2204.22	2755.03	1419.68
		2205.71	44.1487	0.367906		2205.71	328.504	352.738	2205.71	13.8812	700.116	2205.71	152.091	1101.09	2205.71	2530.87	1418.08
		2207.21	74.1649	0.618041		2207.21	387.893	353.232	2207.21	232.259	701.935	2207.21	148.572	1101.06	2207.21	2517.68	1417.98
		2208.71	35.5271	0.296059		2208.71	406.513	353.388	2208.71	110.639	700.922	2208.71	115.683	1100.83	2208.71	2336.21	1416.69
		2210.21	-111.063	-0.925522		2210.21	379.427	353.162	2210.21	92.0743	700.767	2210.21	-101.987	1099.27	2210.21	2351.11	1416.79
		2211.71	-13.9288	-0.116073		2211.71	385.136	353.209	2211.71	29.3861	700.245	2211.71	117.135	1100.84	2211.71	2557.57	1418.27
		2213.21	104.535	0.871122		2213.21	304.209	352.535	2213.21	428.185	703.568	2213.21	81.1414	1100.58	2213.21	2158.84	1415.42
		2214.7	-79.7198	-0.664332		2214.7	401.729	353.348	2214.7	195.441	701.629	2214.7	-64.4608	1099.54	2214.7	2617.7	1418.7
		2216.2	9.34755	0.0778963		2216.2	358.59	352.988	2216.2	46.1473	700.385	2216.2	30.579	1100.22	2216.2	2076.7	1414.83
		2217.7	-27.6063	-0.230053		2217.7	261.489	352.179	2217.7	158.829	701.324	2217.7	76.6024	1100.55	2217.7	2418.16	1417.27
		2219.19	25.5136	0.212613		2219.19	423.184	353.527	2219.19	150.428	701.254	2219.19	103.055	1100.74	2219.19	2510.98	1417.94
		2220.69	6.60045	0.0550037		2220.69	393.384	353.278	2220.69	65.0934	700.542	2220.69	41.1285	1100.29	2220.69	2338.64	1416.7
		2222.19	-12.3037	-0.102531		2222.19	414.442	353.454	2222.19	199.317	701.661	2222.19	107.027	1100.76	2222.19	2428.52	1417.35
		2223.68	1.57425	0.0131187		2223.68	348.747	352.906	2223.68	153.407	701.278	2223.68	117.3	1100.84	2223.68	2397.33	1417.12
		2225.18	76.117	0.634308		2225.18	407.668	353.397	2225.18	130.473	701.087	2225.18	-26.4281	1099.81	2225.18	2217.12	1415.84
		2226.67	19.5603	0.163003		2226.67	455.223	353.794	2226.67	61.6923	700.514	2226.67	164.268	1101.17	2226.67	2310.76	1416.51
		2228.16	-5.84986	-0.0487488		2228.16	206.103	351.718	2228.16	165.104	701.376	2228.16	79.6397	1100.57	2228.16	2142.25	1415.3
		2229.66	-11.5745	-0.0964541		2229.66	161.962	351.35	2229.66	189.895	701.582	2229.66	144.273	1101.03	2229.66	2032.87	1414.52
		2231.15	43.406	0.361717		2231.15	288.478	352.404	2231.15	78.6061	700.655	2231.15	128.617	1100.92	2231.15	2300.86	1416.43
		2232.65	13.1105	0.109255		2232.65	198.561	351.655	2232.65	124.83	701.04	2232.65	-87.1479	1099.38	2232.65	2308.24	1416.49
		2234.14	-13.9001	-0.115834		2234.14	340.067	352.834	2234.14	241.692	702.014	2234.14	113.868	1100.81	2234.14	2323.99	1416.6
		2235.63	60.8546	0.507122		2235.63	319.223	352.66	2235.63	219.152	701.826	2235.63	-55.9149	1099.6	2235.63	2115.03	1415.11
		2237.12	137.296	1.14413		2237.12	208.16	351.735	2237.12	227.849	701.899	2237.12	22.1783	1100.16	2237.12	2045.68	1414.61
		2238.62	-70.279	-0.585658		2238.62	212.072	351.767	2238.62	121.667	701.014	2238.62	52.7426	1100.38	2238.62	2276.93	1416.26
		2240.11	50.5383	0.421153		2240.11	114.24	350.952	2240.11	212.576	701.771	2240.11	85.0157	1100.61	2240.11	2135.62	1415.25
		2241.6	84.3589	0.702991		2241.6	197.14	351.643	2241.6	-28.2378	699.765	2241.6	140.355	1101	2241.6	2206.3	1415.76
		2243.09	37.7012	0.314177		2243.09	322.87	352.691	2243.09	87.4332	700.729	2243.09	-49.0329	1099.65	2243.09	2001.14	1414.29
		2244.58	41.9808	0.34984		2244.58	259.75	352.165	2244.58	91.4665	700.762	2244.58	50.7799	1100.36	2244.58	1935.73	1413.83
		2246.08	115.309	0.960907		2246.08	226.267	351.886	2246.08	92.2639	700.769	2246.08	32.3429	1100.23	2246.08	1918.09	1413.7
		2247.57	91.6851	0.764042		2247.57	340.807	352.84	2247.57	247.655	702.064	2247.57	2.44499	1100.02	2247.57	1994.31	1414.25
		2249.06	72.9978	0.608315		2249.06	136.476	351.137	2249.06	-155.9	698.701	2249.06	89.3321	1100.64	2249.06	1768.15	1412.63
		2250.55	46.0926	0.384105		2250.55	328.496	352.737	2250.55	101.582	700.847	2250.55	74.3397	1100.53	2250.55	1785.45	1412.75
		2252.04	109.662	0.91385		2252.04	201.548	351.68	2252.04	2.26856	700.019	2252.04	92.291	1100.66	2252.04	1834.16	1413.1
		2253.53	56.4536	0.470447		2253.53	110.82	350.924	2253.53	299.483	702.496	2253.53	-27.9044	1099.8	2253.53	1869.87	1413.36
		2255.01	21.3374	0.177811		2255.01	293.307	352.444	2255.01	37.3593	700.311	2255.01	-98.7295	1099.29	2255.01	1971.57	1414.08
		2256.5	-33.5322	-0.279435		2256.5	192.837	351.607	2256.5	147.168	701.226	2256.5	44.4425	1100.32	2256.5	1796.92	1412.84
		2257.99	-57.1331	-0.476109		2257.99	304.774	352.54	2257.99	120.437	701.004	2257.99	60.9563	1100.44	2257.99	1856.12	1413.26
		2259.48	-64.266	-0.53555		2259.48	107.264	350.894	2259.48	-0.109953	699.999	2259.48	163.15	1101.17	2259.48	1849.62	1413.21
		2260.97	-87.8599	-0.732166		2260.97	163.381	351.362	2260.97	34.1639	700.285	2260.97	-60.6664	1099.57	2260.97	1698.33	1412.13
		2262.46	20.3311	0.169426		2262.46	213.004	351.775	2262.46	56.9771	700.475	2262.46	-132.974	1099.05	2262.46	1762.92	1412.59
		2263.94	1.70906	0.0142422		2263.94	261.074	352.176	2263.94	-17.3616	699.855	2263.94	83.0717	1100.59	2263.94	1750.23	1412.5
		2265.43	27.5845	0.229871		2265.43	244.964	352.041	2265.43	38.5163	700.321	2265.43	-109.444	1099.22	2265.43	1584.42	1411.32
		2266.92	-17.3961	-0.144967		2266.92	294.853	352.457	2266.92	-98.3813	699.18	2266.92	26.0199	1100.19	2266.92	1613.18	1411.52
		2268.4	-6.33148	-0.0527623		2268.4	206.348	351.72	2268.4	-12.7177	699.894	2268.4	-118.684	1099.15	2268.4	1675.06	1411.96
		2269.89	-48.0195	-0.400162		2269.89	218.465	351.821	2269.89	28.5118	700.238	2269.89	71.338	1100.51	2269.89	1598.59	1411.42
		2271.38	-28.6911	-0.239092		2271.38	126.753	351.056	2271.38	112.691	700.939	2271.38	25.6315	1100.18	2271.38	1606.34	1411.47
		2272.86	-39.0396	-0.32533		2272.86	112.605	350.938	2272.86	-37.2871	699.689	2272.86	-43.1445	1099.69	2272.86	1569.69	1411.21
		2274.35	62.8148	0.523456		2274.35	14.3744	350.12	2274.35	101.465	700.846	2274.35	-156.454	1098.88	2274.35	1653.61	1411.81
		2275.83	27.7436	0.231197		2275.83	153.814	351.282	2275.83	-13.8172	699.885	2275.83	116.402	1100.83	2275.83	1526.46	1410.9
		2277.31	40.5347	0.337789		2277.31	40.8335	350.34	2277.31	55.775	700.465	2277.31	49.3809	1100.35	2277.31	1572.71	1411.23
		2278.8	31.8766	0.265638		2278.8	21.9803	350.183	2278.8	52.8047	700.44	2278.8	-123.289	1099.12	2278.8	1419.34	1410.14
		2280.28	-32.9212	-0.274343		2280.28	219.507	351.829	2280.28	97.7699	700.815	2280.28	-31.7785	1099.77	2280.28	1345.31	1409.61
		2281.77	27.7865	0.231554		2281.77	29.0474	350.242	2281.77	-43.8296	699.635	2281.77	-92.142	1099.34	2281.77	1418.37	1410.13
		2283.25	47.226	0.39355		2283.25	96.2828	350.802	2283.25	62.3612	700.52	2283.25	-33.549	1099.76	2283.25	1483.34	1410.6
		2284.73	-17.5871	-0.14656		2284.73	1.68562	350.014	2284.73	-62.6765	699.478	2284.73	-95.5108	1099.32	2284.73	1403.06	1410.02
		2286.22	-27.8818	-0.232348		2286.22	47.5921	350.397	2286.22	-37.3303	699.689	2286.22	63.9945	1100.46	2286.22	1400.55	1410
		2287.7	46.1262	0.384385		2287.7	77.0504	350.642	2287.7	136.846	701.14	2287.7	-176.416	1098.74	2287.7	1424.62	1410.18
		2289.18	12.705	0.105875		2289.18	106.583	350.888	2289.18	54.8844	700.457	2289.18	-178.814	1098.72	2289.18	1443.87	1410.31
		2290.66	99.9923	0.833269		2290.66	111.388	350.928	2290.66	110.186	700.918	2290.66	22.2244	1100.16	2290.66	1324.34	1409.46
		2292.14	33.5012	0.279176		2292.14	117.914	350.983	2292.14	-120.578	698.995	2292.14	-150.418	1098.93	2292.14	1104.01	1407.89
		2293.62	67.9002	0.565835		2293.62	232.032	351.934	2293.62	67.1536	700.56	2293.62	-30.283	1099.78	2293.62	1163.28	1408.31
		2295.11	79.1534	0.659612		2295.11	210.579	351.755	2295.11	-26.2787	699.781	2295.11	18.7856	1100.13	2295.11	1082.06	1407.73
		2296.59	9.32324	0.0776936		2296.59	56.7821	350.473	2296.59	45.7916	700.382	2296.59	-47.9382	1099.66	2296.59	1427.92	1410.2
		2298.07	-25.7705	-0.214754		2298.07	85.0662	350.709	2298.07	40.1422	700.335	2298.07	-46.7884	1099.67	2298.07	1181.44	1408.44
		2299.55	-22.7953	-0.189961		2299.55	-12.4079	349.897	2299.55	31.2297	700.26	2299.55	-63.8176	1099.54	2299.55	1211.47	1408.65
		2301.03	-4.91035	-0.0409195		2301.03	115.351	350.961	2301.03	-47.1938	699.607	2301.03	89.7451	1100.64	2301.03	1095.91	1407.83
		2302.51	-53.2668	-0.44389		2302.51	67.6548	350.564	2302.51	114.561	700.955	2302.51	-61.3581	1099.56	2302.51	1131.15	1408.08
		2303.99	42.4873	0.354061		2303.99	129.333	351.078	2303.99	-5.19869	699.957	2303.99	26.065	1100.19	2303.99	1174.81	1408.39
		2305.46	-48.9551	-0.407959		2305.46	152.983	351.275	2305.46	-35.485	699.704	2305.46	-105.167	1099.25	2305.46	1150.66	1408.22
		2306.94	-37.6786	-0.313988		2306.94	93.8353	350.782	2306.94	58.5606	700.488	2306.94	121.558	1100.87	2306.94	1055.36	1407.54
		2308.42	84.6667	0.705555		2308.42	66.2151	350.552	2308.42	-137.399	698.855	2308.42	-29.5385	1099.79	2308.42	1185.58	1408.47
		2309.9	18.0542	0.150452		2309.9	-85.7078	349.286	2309.9	54.5729	700.455	2309.9	-79.5302	1099.43	2309.9	1088.83	1407.78
		2311.38	-43.6093	-0.363411		2311.38	42.6158	350.355	2311.38	1.23985	700.01	2311.38	-131.172	1099.06	2311.38	1012.05	1407.23
		2312.86	68.8623	0.573852		2312.86	111.338	350.928	2312.86	-63.6841	699.469	2312.86	16.2312	1100.12	2312.86	1001.7	1407.16
		2314.33	17.1408	0.14284		2314.33	42.4433	350.354	2314.33	116.941	700.975	2314.33	-71.8538	1099.49	2314.33	931.737	1406.66
		2315.81	-59.4905	-0.495754		2315.81	-38.0403	349.683	2315.81	15.5974	700.13	2315.81	-126.761	1099.09	2315.81	812.078	1405.8
		2317.29	76.2828	0.63569		2317.29	-25.5631	349.787	2317.29	-14.3782	699.88	2317.29	100.475	1100.72	2317.29	904.917	1406.46
		2318.76	74.3324	0.619437		2318.76	15.1907	350.127	2318.76	-110.724	699.077	2318.76	-92.1447	1099.34	2318.76	805.348	1405.75
		2320.24	12.61	0.105084		2320.24	80.9189	350.674	2320.24	-79.2205	699.34	2320.24	47.2452	1100.34	2320.24	929.992	1406.64
		2321.71	130.212	1.0851		2321.71	-135.59	348.87	2321.71	5.47973	700.046	2321.71	-82.3105	1099.41	2321.71	664.538	1404.75
		2323.19	30.272	0.252267		2323.19	187.689	351.564	2323.19	-90.7938	699.243	2323.19	-92.3007	1099.34	2323.19	933.927	1406.67
		2324.66	-18.2089	-0.151741		2324.66	62.5875	350.522	2324.66	33.8926	700.282	2324.66	-45.7895	1099.67	2324.66	766.6	1405.48
		2326.14	28.0037	0.233364		2326.14	57.124	350.476	2326.14	0.811956	700.007	2326.14	-88.9649	1099.36	2326.14	672.425	1404.8
		2327.61	65.9234	0.549362		2327.61	51.7068	350.431	2327.61	40.8866	700.341	2327.61	12.4588	1100.09	2327.61	915.701	1406.54
		2329.09	0.79127	0.00659392		2329.09	-16.8364	349.86	2329.09	125.901	701.049	2329.09	47.4495	1100.34	2329.09	612.269	1404.37
		2330.56	32.066	0.267217		2330.56	19.3919	350.162	2330.56	-38.4095	699.68	2330.56	-7.30541	1099.95	2330.56	837.551	1405.98
		2332.04	18.45	0.15375		2332.04	68.985	350.575	2332.04	-21.4822	699.821	2332.04	-151.863	1098.92	2332.04	539.182	1403.85
		2333.51	91.3181	0.760984		2333.51	-21.0793	349.824	2333.51	108.599	700.905	2333.51	12.9184	1100.09	2333.51	872.854	1406.23
		2334.98	6.16423	0.0513686		2334.98	-11.3153	349.906	2334.98	74.0682	700.617	2334.98	-156.611	1098.88	2334.98	933.92	1406.67
		2336.45	12.4925	0.104104		2336.45	156.578	351.305	2336.45	-256.63	697.861	2336.45	-33.3244	1099.76	2336.45	835.366	1405.97
		2337.93	160.288	1.33573		2337.93	-59.8783	349.501	2337.93	-106.431	699.113	2337.93	-88.0533	1099.37	2337.93	783.472	1405.6
		2339.4	78.4145	0.653454		2339.4	103.166	350.86	2339.4	35.5417	700.296	2339.4	-136.127	1099.03	2339.4	685.045	1404.89
		2340.87	3.163	0.0263584		2340.87	29.8833	350.249	2340.87	94.3603	700.786	2340.87	-22.6997	1099.84	2340.87	598.321	1404.27
		2342.34	76.0919	0.634099		2342.34	-33.3943	349.722	2342.34	118.267	700.986	2342.34	120.766	1100.86	2342.34	599.923	1404.29
		2343.81	10.7946	0.0899553		2343.81	46.5964	350.388	2343.81	17.2925	700.144	2343.81	-108.802	1099.22	2343.81	704.898	1405.03
		2345.28	20.4356	0.170296		2345.28	-109.918	349.084	2345.28	149.555	701.246	2345.28	106.376	1100.76	2345.28	743.36	1405.31
		2346.75	71.7334	0.597779		2346.75	-121.484	348.988	2346.75	103.608	700.863	2346.75	123.361	1100.88	2346.75	625.294	1404.47
		2348.22	56.378	0.469817		2348.22	30.3152	350.253	2348.22	-83.9897	699.3	2348.22	28.6984	1100.2	2348.22	703.931	1405.03
		2349.69	102.691	0.855755		2349.69	112.205	350.935	2349.69	55.1065	700.459	2349.69	24.0325	1100.17	2349.69	676.011	1404.83
		2351.16	67.3151	0.560959		2351.16	137.474	351.146	2351.16	60.9039	700.508	2351.16	-38.9785	1099.72	2351.16	696.52	1404.98
		2352.63	-4.77148	-0.0397623		2352.63	11.0269	350.092	2352.63	63.4024	700.528	2352.63	-21.9549	1099.84	2352.63	605.383	1404.32
		2354.1	103.252	0.860435		2354.1	224.841	351.874	2354.1	-17.4652	699.854	2354.1	63.4773	1100.45	2354.1	622.719	1404.45
		2355.57	26.1243	0.217703		2355.57	40.0412	350.334	2355.57	71.8409	700.599	2355.57	58.8646	1100.42	2355.57	545.05	1403.89
		2357.04	97.4713	0.812261		2357.04	100.499	350.837	2357.04	131.178	701.093	2357.04	0.864493	1100.01	2357.04	630.967	1404.51
		2358.51	103.747	0.864556		2358.51	-75.9867	349.367	2358.51	122.14	701.018	2358.51	21.296	1100.15	2358.51	513.38	1403.67
		2359.97	91.6525	0.763771		2359.97	-27.1494	349.774	2359.97	139.843	701.165	2359.97	121.874	1100.87	2359.97	477.619	1403.41
		2361.44	84.5544	0.70462		2361.44	116.917	350.974	2361.44	95.8027	700.798	2361.44	62.2134	1100.44	2361.44	679.032	1404.85
		2362.91	47.3833	0.394861		2362.91	20.5846	350.172	2362.91	-53.4352	699.555	2362.91	91.048	1100.65	2362.91	486.468	1403.47
		2364.38	105.399	0.878326		2364.38	-179.318	348.506	2364.38	-40.6766	699.661	2364.38	48.0777	1100.34	2364.38	308.939	1402.21
		2365.84	109.966	0.916384		2365.84	-90.2373	349.248	2365.84	-12.8458	699.893	2365.84	-86.7899	1099.38	2365.84	584.18	1404.17
		2367.31	27.6307	0.230256		2367.31	139.276	351.161	2367.31	43.4327	700.362	2367.31	97.4654	1100.7	2367.31	401.742	1402.87
		2368.78	65.5911	0.546593		2368.78	76.4204	350.637	2368.78	81.3775	700.678	2368.78	114.664	1100.82	2368.78	296.19	1402.12
		2370.24	136.99	1.14158		2370.24	15.2351	350.127	2370.24	-21.0562	699.825	2370.24	120.173	1100.86	2370.24	269.231	1401.92
		2371.71	26.1531	0.217943		2371.71	146.339	351.219	2371.71	23.6373	700.197	2371.71	102.282	1100.73	2371.71	352.692	1402.52
		2373.17	89.1897	0.743248		2373.17	190.564	351.588	2373.17	98.4794	700.821	2373.17	-42.709	1099.69	2373.17	615.214	1404.39
		2374.64	92.0215	0.766846		2374.64	64.2105	350.535	2374.64	-3.92929	699.967	2374.64	173.553	1101.24	2374.64	350.994	1402.51
		2376.1	47.997	0.399975		2376.1	41.5617	350.346	2376.1	10.7617	700.09	2376.1	87.0842	1100.62	2376.1	426.371	1403.05
		2377.57	111.039	0.925328		2377.57	122.675	351.022	2377.57	-13.0013	699.892	2377.57	44.0899	1100.31	2377.57	506.855	1403.62
		2379.03	77.0191	0.641826		2379.03	46.5191	350.388	2379.03	62.001	700.517	2379.03	51.2974	1100.37	2379.03	458.575	1403.28
		2380.5	126.676	1.05563		2380.5	116.001	350.967	2380.5	91.8606	700.766	2380.5	60.1868	1100.43	2380.5	489.023	1403.49
		2381.96	142.851	1.19043		2381.96	-65.6322	349.453	2381.96	-12.1951	699.898	2381.96	105.916	1100.76	2381.96	400.655	1402.86
		2383.42	133.898	1.11582		2383.42	29.0166	350.242	2383.42	-44.2537	699.631	2383.42	86.3525	1100.62	2383.42	451.321	1403.22
		2384.88	128.279	1.06899		2384.88	-38.7578	349.677	2384.88	35.9293	700.299	2384.88	-33.7219	1099.76	2384.88	404.916	1402.89
		2386.35	45.5745	0.379787		2386.35	129.696	351.081	2386.35	119.52	700.996	2386.35	109.197	1100.78	2386.35	373.633	1402.67
		2387.81	49.9616	0.416347		2387.81	145.744	351.215	2387.81	59.0532	700.492	2387.81	-61.1895	1099.56	2387.81	442.944	1403.16
		2389.27	61.04	0.508667		2389.27	-87.9253	349.267	2389.27	-28.2311	699.765	2389.27	-48.9526	1099.65	2389.27	229.074	1401.64
		2390.73	159.283	1.32736		2390.73	105.826	350.882	2390.73	-103.793	699.135	2390.73	48.789	1100.35	2390.73	271.68	1401.94
		2392.2	14.4193	0.120161		2392.2	88.3945	350.737	2392.2	100.656	700.839	2392.2	-84.8243	1099.39	2392.2	404.896	1402.89
		2393.66	74.0883	0.617402		2393.66	117.933	350.983	2393.66	144.208	701.202	2393.66	-12.2099	1099.91	2393.66	365.481	1402.61
		2395.12	73.3783	0.611486		2395.12	-21.9211	349.817	2395.12	-48.7193	699.594	2395.12	184.564	1101.32	2395.12	327.782	1402.34
		2396.58	141.441	1.17867		2396.58	9.31835	350.078	2396.58	130.762	701.09	2396.58	10.6274	1100.08	2396.58	397.501	1402.84
		2398.04	71.9091	0.599243		2398.04	-68.4978	349.429	2398.04	105.607	700.88	2398.04	34.6339	1100.25	2398.04	373.315	1402.67
		2399.5	30.8675	0.257229		2399.5	-67.4374	349.438	2399.5	45.2154	700.377	2399.5	157.679	1101.13	2399.5	344.148	1402.46
		2400.96	83.8041	0.698368		2400.96	51.1472	350.426	2400.96	216.492	701.804	2400.96	136.393	1100.97	2400.96	397.27	1402.84
		2402.42	20.886	0.17405		2402.42	65.6869	350.547	2402.42	188.041	701.567	2402.42	41.2135	1100.29	2402.42	301.02	1402.15
		2403.88	129.23	1.07692		2403.88	4.66938	350.039	2403.88	5.08769	700.042	2403.88	102.183	1100.73	2403.88	381.124	1402.72
		2405.33	78.0195	0.650162		2405.33	103.22	350.86	2405.33	156.358	701.303	2405.33	23.7504	1100.17	2405.33	484.824	1403.46
		2406.79	73.8146	0.615122		2406.79	67.4111	350.562	2406.79	255.624	702.13	2406.79	22.5675	1100.16	2406.79	393.718	1402.81
		2408.25	96.4776	0.80398		2408.25	-10.412	349.913	2408.25	94.4753	700.787	2408.25	133.971	1100.96	2408.25	314.383	1402.25
		2409.71	114.089	0.950741		2409.71	0.818913	350.007	2409.71	118.167	700.985	2409.71	-1.66646	1099.99	2409.71	56.8842	1400.41
		2411.17	20.7337	0.172781		2411.17	129.747	351.081	2411.17	146.93	701.224	2411.17	-11.2766	1099.92	2411.17	169.181	1401.21
		2412.62	95.4697	0.795581		2412.62	51.9109	350.433	2412.62	-44.5539	699.629	2412.62	16.0949	1100.11	2412.62	246.248	1401.76
		2414.08	30.6265	0.255221		2414.08	212.869	351.774	2414.08	214.629	701.789	2414.08	23.2887	1100.17	2414.08	316.659	1402.26
		2415.54	54.8917	0.457431		2415.54	101.391	350.845	2415.54	196.376	701.636	2415.54	176.827	1101.26	2415.54	289.574	1402.07
		2417	45.4977	0.379148		2417	21.841	350.182	2417	206.734	701.723	2417	22.5237	1100.16	2417	311.309	1402.22
		2418.45	157.244	1.31036		2418.45	75.2058	350.627	2418.45	-25.217	699.79	2418.45	-30.8796	1099.78	2418.45	297.743	1402.13
		2419.91	130.995	1.09162		2419.91	190.872	351.591	2419.91	232.555	701.938	2419.91	206.874	1101.48	2419.91	230.342	1401.65
		2421.36	57.5774	0.479812		2421.36	-8.22315	349.931	2421.36	52.7335	700.439	2421.36	175.355	1101.25	2421.36	425.581	1403.04
		2422.82	137.339	1.14449		2422.82	-23.8581	349.801	2422.82	106.907	700.891	2422.82	179.175	1101.28	2422.82	294.261	1402.1
		2424.27	168.271	1.40226		2424.27	140.71	351.173	2424.27	147.644	701.23	2424.27	135.831	1100.97	2424.27	135.974	1400.97
		2425.73	162.136	1.35113		2425.73	182.378	351.52	2425.73	132.819	701.107	2425.73	68.878	1100.49	2425.73	284.237	1402.03
		2427.18	184.619	1.53849		2427.18	133.079	351.109	2427.18	249.42	702.079	2427.18	246.19	1101.76	2427.18	461.227	1403.29
		2428.64	191.923	1.59936		2428.64	157.91	351.316	2428.64	219.468	701.829	2428.64	174.156	1101.24	2428.64	289.482	1402.07
		2430.09	182.353	1.51961		2430.09	243.432	352.029	2430.09	319.302	702.661	2430.09	95.3404	1100.68	2430.09	372.211	1402.66
		2431.54	46.3178	0.385982		2431.54	313.811	352.615	2431.54	287.69	702.397	2431.54	48.5133	1100.35	2431.54	200.429	1401.43
		2433	159.764	1.33136		2433	173.443	351.445	2433	363.993	703.033	2433	107.888	1100.77	2433	217.459	1401.55
		2434.45	146.742	1.22285		2434.45	21.2113	350.177	2434.45	87.8496	700.732	2434.45	189.2	1101.35	2434.45	177.178	1401.27
		2435.9	143.815	1.19846		2435.9	64.5947	350.538	2435.9	297.427	702.479	2435.9	86.6638	1100.62	2435.9	249.927	1401.79
		2437.35	186.418	1.55348		2437.35	18.5676	350.155	2437.35	125.788	701.048	2437.35	230.407	1101.65	2437.35	324.407	1402.32
		2438.81	158.138	1.31782		2438.81	229.027	351.909	2438.81	202.159	701.685	2438.81	100.812	1100.72	2438.81	371.938	1402.66
		2440.26	96.0662	0.800551		2440.26	83.4226	350.695	2440.26	69.2719	700.577	2440.26	96.0573	1100.69	2440.26	291.23	1402.08
		2441.71	66.0222	0.550185		2441.71	130.21	351.085	2441.71	52.8273	700.44	2441.71	273.615	1101.95	2441.71	205.438	1401.47
		2443.16	145.7	1.21417		2443.16	197.274	351.644	2443.16	41.4502	700.345	2443.16	40.9099	1100.29	2443.16	133.138	1400.95
		2444.61	9.20561	0.0767134		2444.61	44.8011	350.373	2444.61	156.745	701.306	2444.61	49.6116	1100.35	2444.61	30.4258	1400.22
		2446.06	142.912	1.19093		2446.06	-33.4146	349.722	2446.06	128.506	701.071	2446.06	183.307	1101.31	2446.06	64.511	1400.46
		2447.51	114.448	0.953733		2447.51	-74.4981	349.379	2447.51	176.296	701.469	2447.51	112.602	1100.8	2447.51	85.1093	1400.61
		2448.96	69.0488	0.575407		2448.96	36.488	350.304	2448.96	70.3293	700.586	2448.96	143.251	1101.02	2448.96	134.459	1400.96
		2450.41	30.3681	0.253067		2450.41	61.3064	350.511	2450.41	-83.0018	699.308	2450.41	109.667	1100.78	2450.41	178.769	1401.28
		2451.86	60.962	0.508017		2451.86	77.671	350.647	2451.86	-19.9913	699.833	2451.86	18.5744	1100.13	2451.86	-1.74598	1399.99
		2453.31	72.943	0.607858		2453.31	-122.407	348.98	2453.31	102.233	700.852	2453.31	145.561	1101.04	2453.31	209.975	1401.5
		2454.76	61.226	0.510216		2454.76	-1.23268	349.99	2454.76	187.303	701.561	2454.76	100.075	1100.71	2454.76	168.099	1401.2
		2456.21	69.7787	0.581489		2456.21	79.3775	350.661	2456.21	-30.3858	699.747	2456.21	-117.992	1099.16	2456.21	-9.11911	1399.93
		2457.66	25.859	0.215492		2457.66	-17.6449	349.853	2457.66	-18.0521	699.85	2457.66	59.7563	1100.43	2457.66	153.681	1401.1
		2459.11	-4.56581	-0.0380484		2459.11	-25.0267	349.791	2459.11	28.1364	700.234	2459.11	-4.43703	1099.97	2459.11	226.861	1401.62
		2460.55	-68.8807	-0.574006		2460.55	92.8303	350.774	2460.55	70.9634	700.591	2460.55	-14.5082	1099.9	2460.55	144.355	1401.03
		2462	25.8919	0.215766		2462	34.6515	350.289	2462	-162.144	698.649	2462	-97.3981	1099.3	2462	168.472	1401.2
		2463.45	47.8642	0.398868		2463.45	-87.9098	349.267	2463.45	65.239	700.544	2463.45	11.0056	1100.08	2463.45	204.455	1401.46
		2464.89	-3.00718	-0.0250598		2464.89	-14.0745	349.883	2464.89	74.2349	700.619	2464.89	-7.58753	1099.95	2464.89	125.28	1400.89
		2466.34	-11.5759	-0.0964661		2466.34	-30.0016	349.75	2466.34	39.1945	700.327	2466.34	-4.1813	1099.97	2466.34	130.782	1400.93
		2467.79	108.594	0.904951		2467.79	87.8981	350.732	2467.79	-97.518	699.187	2467.79	-10.9588	1099.92	2467.79	46.4807	1400.33
		2469.23	140.664	1.1722		2469.23	102.453	350.854	2469.23	28.3893	700.237	2469.23	17.8317	1100.13	2469.23	58.7346	1400.42
		2470.68	65.9341	0.549451		2470.68	1.74041	350.015	2470.68	105.195	700.877	2470.68	-51.6925	1099.63	2470.68	150.665	1401.08
		2472.12	-12.2424	-0.10202		2472.12	19.642	350.164	2472.12	98.9603	700.825	2472.12	-116.176	1099.17	2472.12	-52.3663	1399.63
		2473.57	82.4819	0.68735		2473.57	52.7946	350.44	2473.57	43.5499	700.363	2473.57	-2.65793	1099.98	2473.57	-36.7396	1399.74
		2475.01	73.7603	0.614669		2475.01	-22.6048	349.812	2475.01	55.9581	700.466	2475.01	-167.26	1098.81	2475.01	2.62719	1400.02
		2476.46	-62.2185	-0.518487		2476.46	61.4054	350.512	2476.46	56.4974	700.471	2476.46	-38.4748	1099.73	2476.46	21.6479	1400.15
		2477.9	-71.0271	-0.591892		2477.9	-59.8696	349.501	2477.9	31.5876	700.263	2477.9	37.7453	1100.27	2477.9	203.554	1401.45
		2479.35	100.019	0.833491		2479.35	119.163	350.993	2479.35	11.7585	700.098	2479.35	-35.3611	1099.75	2479.35	134.364	1400.96
		2480.79	81.0006	0.675005		2480.79	-122.704	348.977	2480.79	-2.98751	699.975	2480.79	-15.1595	1099.89	2480.79	-18.0385	1399.87
		2482.23	-9.3569	-0.0779741		2482.23	46.1595	350.385	2482.23	-39.8096	699.668	2482.23	101.8	1100.73	2482.23	45.0986	1400.32
		2483.68	-25.064	-0.208867		2483.68	58.8491	350.49	2483.68	93.1583	700.776	2483.68	15.0228	1100.11	2483.68	13.1605	1400.09
		2485.12	30.5269	0.254391		2485.12	-1.50845	349.987	2485.12	134.465	701.121	2485.12	81.0471	1100.58	2485.12	83.1021	1400.59
		2486.56	-20.9073	-0.174228		2486.56	-34.7343	349.711	2486.56	50.0793	700.417	2486.56	9.48056	1100.07	2486.56	15.4571	1400.11
		2488.01	-28.2141	-0.235118		2488.01	90.0183	350.75	2488.01	-100.605	699.162	2488.01	-14.5589	1099.9	2488.01	49.7164	1400.36
		2489.45	-20.2566	-0.168805		2489.45	-70.7054	349.411	2489.45	35.8484	700.299	2489.45	53.1397	1100.38	2489.45	-87.6703	1399.37
		2490.89	53.9661	0.449717		2490.89	-0.349958	349.997	2490.89	66.9709	700.558	2490.89	27.3603	1100.2	2490.89	208.309	1401.49
		2492.33	26.1845	0.218204		2492.33	114.213	350.952	2492.33	38.5994	700.322	2492.33	84.8558	1100.61	2492.33	92.9713	1400.66
		2493.77	-15.2398	-0.126998		2493.77	33.2483	350.277	2493.77	-44.1998	699.632	2493.77	-172.224	1098.77	2493.77	147.615	1401.05
		2495.21	-44.8038	-0.373365		2495.21	21.9585	350.183	2495.21	90.6628	700.756	2495.21	38.2852	1100.27	2495.21	-49.4504	1399.65
		2496.65	14.0503	0.117086		2496.65	-54.0044	349.55	2496.65	-65.3134	699.456	2496.65	78.7474	1100.56	2496.65	-8.46318	1399.94
		2498.09	-78.5284	-0.654403		2498.09	-14.3274	349.881	2498.09	20.2504	700.169	2498.09	76.6698	1100.55	2498.09	-79.7805	1399.43
		2499.53	90.9013	0.757511		2499.53	-41.0269	349.658	2499.53	122.863	701.024	2499.53	55.8529	1100.4	2499.53	146.674	1401.05
		2500.97	42.4988	0.354157		2500.97	63.298	350.527	2500.97	-33.2109	699.723	2500.97	23.0917	1100.16	2500.97	151.916	1401.09
		2502.41	16.1803	0.134836		2502.41	0.79746	350.007	2502.41	-7.18785	699.94	2502.41	-55.6685	1099.6	2502.41	155.438	1401.11
		2503.85	-15.2858	-0.127382		2503.85	77.875	350.649	2503.85	68.2231	700.569	2503.85	20.4764	1100.15	2503.85	186.183	1401.33
		2505.29	-9.32309	-0.0776924		2505.29	-42.6113	349.645	2505.29	-41.9833	699.65	2505.29	67.6769	1100.48	2505.29	-43.6688	1399.69
		2506.73	-27.2359	-0.226965		2506.73	49.763	350.415	2506.73	35.1441	700.293	2506.73	10.9642	1100.08	2506.73	90.9099	1400.65
		2508.17	-2.58883	-0.0215736		2508.17	-0.975456	349.992	2508.17	-6.96903	699.942	2508.17	-90.0906	1099.36	2508.17	-9.60892	1399.93
		2509.6	10.111	0.0842582		2509.6	-63.6933	349.469	2509.6	-32.0635	699.733	2509.6	141.107	1101.01	2509.6	77.2597	1400.55
		2511.04	17.6735	0.147279		2511.04	-124.76	348.96	2511.04	205.321	701.711	2511.04	-149.202	1098.93	2511.04	-19.9502	1399.86
		2512.48	47.3729	0.394774		2512.48	39.1591	350.326	2512.48	-78.8886	699.343	2512.48	64.9863	1100.46	2512.48	-8.11328	1399.94
		2513.92	-3.08822	-0.0257352		2513.92	27.4805	350.229	2513.92	27.2701	700.227	2513.92	54.1572	1100.39	2513.92	-107.137	1399.23
		2515.35	-24.6035	-0.205029		2515.35	70.3421	350.586	2515.35	-103.602	699.137	2515.35	113.229	1100.81	2515.35	25.7177	1400.18
		2516.79	5.01946	0.0418289		2516.79	113.191	350.943	2516.79	92.9929	700.775	2516.79	-66.5162	1099.52	2516.79	-119.459	1399.15
		2518.23	10.7387	0.0894893		2518.23	24.6487	350.205	2518.23	47.3793	700.395	2518.23	-24.5453	1099.82	2518.23	4.85906	1400.03
		2519.66	-34.7639	-0.289699		2519.66	55.4969	350.462	2519.66	-46.0429	699.616	2519.66	-183.951	1098.69	2519.66	89.9391	1400.64
		2521.1	20.3926	0.169938		2521.1	-31.449	349.738	2521.1	-25.1469	699.79	2521.1	44.0223	1100.31	2521.1	60.6622	1400.43
		2522.53	-37.1347	-0.309456		2522.53	67.6277	350.564	2522.53	29.8956	700.249	2522.53	70.6149	1100.5	2522.53	-91.5788	1399.35
		2523.97	-5.92016	-0.0493346		2523.97	38.644	350.322	2523.97	67.8771	700.566	2523.97	-20.6239	1099.85	2523.97	157.367	1401.12
		2525.4	-10.587	-0.0882252		2525.4	42.0657	350.351	2525.4	-1.73183	699.986	2525.4	-26.5236	1099.81	2525.4	-3.52453	1399.97
		2526.84	59.8786	0.498988		2526.84	125.744	351.048	2526.84	22.5786	700.188	2526.84	32.4682	1100.23	2526.84	119.056	1400.85
		2528.27	-14.8852	-0.124043		2528.27	103.489	350.862	2528.27	-65.8767	699.451	2528.27	-45.2234	1099.68	2528.27	79.3296	1400.57
		2529.71	-52.1126	-0.434271		2529.71	115.373	350.961	2529.71	-7.40474	699.938	2529.71	39.3826	1100.28	2529.71	63.4845	1400.45
		2531.14	54.1966	0.451639		2531.14	-52.2466	349.565	2531.14	-106.171	699.115	2531.14	-146.061	1098.96	2531.14	-5.3954	1399.96
		2532.57	-18.9895	-0.158246		2532.57	157.858	351.315	2532.57	15.5561	700.13	2532.57	1.77505	1100.01	2532.57	-45.2741	1399.68
		2534.01	42.8542	0.357119		2534.01	32.8607	350.274	2534.01	26.1767	700.218	2534.01	-93.1618	1099.33	2534.01	207.19	1401.48
		2535.44	17.4694	0.145578		2535.44	32.6308	350.272	2535.44	65.8683	700.549	2535.44	-191.577	1098.63	2535.44	69.7726	1400.5
		2536.87	-16.5073	-0.137561		2536.87	52.8948	350.441	2536.87	-87.7335	699.269	2536.87	-21.48	1099.85	2536.87	135.828	1400.97
		2538.3	-26.5724	-0.221436		2538.3	64.5782	350.538	2538.3	-61.7518	699.485	2538.3	-65.2068	1099.53	2538.3	-6.86653	1399.95
		2539.74	40.341	0.336175		2539.74	146.393	351.22	2539.74	-32.3452	699.73	2539.74	34.7812	1100.25	2539.74	144.684	1401.03
		2541.17	-2.29284	-0.019107		2541.17	34.7901	350.29	2541.17	14.1809	700.118	2541.17	139.924	1101	2541.17	63.4714	1400.45
		2542.6	-29.5641	-0.246368		2542.6	37.8112	350.315	2542.6	9.35862	700.078	2542.6	-21.9799	1099.84	2542.6	66.0745	1400.47
		2544.03	-15.7764	-0.13147		2544.03	13.3991	350.112	2544.03	98.7033	700.823	2544.03	83.1564	1100.59	2544.03	190.209	1401.36
		2545.46	-60.2423	-0.502019		2545.46	-67.5761	349.437	2545.46	-84.2401	699.298	2545.46	-109.69	1099.22	2545.46	67.728	1400.48
		2546.89	20.2968	0.16914		2546.89	67.2223	350.56	2546.89	-22.3025	699.814	2546.89	98.2163	1100.7	2546.89	-101.095	1399.28
		2548.32	-51.649	-0.430408		2548.32	-39.5453	349.67	2548.32	-70.0047	699.417	2548.32	127.997	1100.91	2548.32	-21.5888	1399.85
		2549.75	37.4388	0.31199		2549.75	223.766	351.865	2549.75	-11.4844	699.904	2549.75	102.933	1100.74	2549.75	52.7611	1400.38
		2551.18	-32.8713	-0.273927		2551.18	240.325	352.003	2551.18	23.0543	700.192	2551.18	-6.1465	1099.96	2551.18	53.3935	1400.38
		2552.61	-55.2341	-0.460284		2552.61	1.4116	350.012	2552.61	-137.843	698.851	2552.61	-27.8543	1099.8	2552.61	-105.453	1399.25
		2554.04	-55.34	-0.461167		2554.04	215.053	351.792	2554.04	92.1458	700.768	2554.04	-78.7383	1099.44	2554.04	35.6647	1400.25
		2555.47	-31.4619	-0.262182		2555.47	-48.0461	349.6	2555.47	76.9631	700.641	2555.47	223.644	1101.6	2555.47	243.683	1401.74
		2556.9	-50.4865	-0.420721		2556.9	182.752	351.523	2556.9	-34.2979	699.714	2556.9	195.056	1101.39	2556.9	110.376	1400.79
		2558.32	-66.1121	-0.550934		2558.32	-58.2277	349.515	2558.32	-15.2146	699.873	2558.32	260.805	1101.86	2558.32	143.392	1401.02
		2559.75	124.159	1.03466		2559.75	54.177	350.451	2559.75	34.7573	700.29	2559.75	-47.5433	1099.66	2559.75	148.924	1401.06
		2561.18	51.8679	0.432232		2561.18	298.752	352.49	2561.18	-26.827	699.776	2561.18	69.6432	1100.5	2561.18	253.957	1401.81
		2562.61	-82.2836	-0.685696		2562.61	179.433	351.495	2562.61	66.0642	700.551	2562.61	106.172	1100.76	2562.61	106.626	1400.76
		2564.03	68.5286	0.571071		2564.03	-111.684	349.069	2564.03	167.57	701.396	2564.03	43.1054	1100.31	2564.03	206.449	1401.47
		2565.46	1.25559	0.0104632		2565.46	38.4347	350.32	2565.46	93.9268	700.783	2565.46	4.04359	1100.03	2565.46	83.0028	1400.59
		2566.89	-28.2745	-0.235621		2566.89	16.7931	350.14	2566.89	171.412	701.428	2566.89	33.6614	1100.24	2566.89	45.3406	1400.32
		2568.31	138.024	1.1502		2568.31	166.922	351.391	2568.31	171.603	701.43	2568.31	-24.3496	1099.83	2568.31	318.605	1402.28
		2569.74	25.9713	0.216427		2569.74	23.2109	350.193	2569.74	10.2478	700.085	2569.74	-151.138	1098.92	2569.74	14.5159	1400.1
		2571.17	44.4791	0.370659		2571.17	-62.154	349.482	2571.17	72.2677	700.602	2571.17	184.372	1101.32	2571.17	-14.7289	1399.89
		2572.59	166.121	1.38434		2572.59	51.832	350.432	2572.59	242.611	702.022	2572.59	12.8457	1100.09	2572.59	53.9538	1400.39
		2574.02	150.224	1.25187		2574.02	76.4128	350.637	2574.02	72.5513	700.605	2574.02	6.31028	1100.05	2574.02	320.366	1402.29
		2575.44	55.1853	0.459877		2575.44	44.2102	350.368	2575.44	101.918	700.849	2575.44	87.4699	1100.62	2575.44	119.031	1400.85
		2576.87	118.344	0.986196		2576.87	221.819	351.848	2576.87	160.531	701.338	2576.87	86.0777	1100.61	2576.87	220.317	1401.57
		2578.29	133.326	1.11105		2578.29	148.266	351.236	2578.29	165.824	701.382	2578.29	67.4664	1100.48	2578.29	113.415	1400.81
		2579.71	117.316	0.977636		2579.71	263.94	352.2	2579.71	103.997	700.867	2579.71	152.086	1101.09	2579.71	140.646	1401
		2581.14	139.144	1.15953		2581.14	353.806	352.948	2581.14	253.846	702.115	2581.14	245.333	1101.75	2581.14	209.148	1401.49
		2582.56	174.73	1.45609		2582.56	274.955	352.291	2582.56	117.968	700.983	2582.56	30.4434	1100.22	2582.56	244.913	1401.75
		2583.98	174.146	1.45122		2583.98	332.068	352.767	2583.98	186.934	701.558	2583.98	292.423	1102.09	2583.98	263.43	1401.88
		2585.41	225.208	1.87673		2585.41	223.83	351.865	2585.41	195.642	701.63	2585.41	215.212	1101.54	2585.41	249.177	1401.78
		2586.83	295.218	2.46015		2586.83	287.769	352.398	2586.83	252.578	702.105	2586.83	72.4994	1100.52	2586.83	289.987	1402.07
		2588.25	313.543	2.61286		2588.25	325.854	352.715	2588.25	309.53	702.579	2588.25	305.317	1102.18	2588.25	256.684	1401.83
		2589.67	323.239	2.69365		2589.67	420.783	353.507	2589.67	199.339	701.661	2589.67	215.964	1101.54	2589.67	388.746	1402.78
		2591.1	181.238	1.51032		2591.1	303.709	352.531	2591.1	252.841	702.107	2591.1	242.045	1101.73	2591.1	472.549	1403.38
		2592.52	287.411	2.39509		2592.52	307.228	352.56	2592.52	199.471	701.662	2592.52	100.902	1100.72	2592.52	359.801	1402.57
		2593.94	221.173	1.84311		2593.94	357.269	352.977	2593.94	299.536	702.496	2593.94	270.067	1101.93	2593.94	305.589	1402.18
		2595.36	156.614	1.30511		2595.36	321.06	352.675	2595.36	134.04	701.117	2595.36	230.606	1101.65	2595.36	173.691	1401.24
		2596.78	235.184	1.95987		2596.78	324.473	352.704	2596.78	277.243	702.31	2596.78	272.194	1101.94	2596.78	407.383	1402.91
		2598.2	232.672	1.93894		2598.2	119.088	350.992	2598.2	170.323	701.419	2598.2	355.196	1102.54	2598.2	223.593	1401.6
		2599.62	161.114	1.34262		2599.62	341.55	352.846	2599.62	229.02	701.908	2599.62	148.309	1101.06	2599.62	282.996	1402.02
		2601.04	184.439	1.53699		2601.04	218.862	351.824	2601.04	232.501	701.938	2601.04	205.411	1101.47	2601.04	471.822	1403.37
		2602.46	161.143	1.34286		2602.46	227.291	351.894	2602.46	194.545	701.621	2602.46	286.695	1102.05	2602.46	401.716	1402.87
		2603.88	310.489	2.58741		2603.88	292.669	352.439	2603.88	286.071	702.384	2603.88	205.693	1101.47	2603.88	417.867	1402.98
		2605.3	136.918	1.14098		2605.3	188.787	351.573	2605.3	172.109	701.434	2605.3	212.73	1101.52	2605.3	484.058	1403.46
		2606.72	220.64	1.83866		2606.72	219.564	351.83	2606.72	127.193	701.06	2606.72	124.757	1100.89	2606.72	427.58	1403.05
		2608.13	335.478	2.79565		2608.13	305.605	352.547	2608.13	236.02	701.967	2608.13	356.371	1102.55	2608.13	234.536	1401.68
		2609.55	363.939	3.03283		2609.55	339.802	352.832	2609.55	187.633	701.564	2609.55	225.173	1101.61	2609.55	290.208	1402.07
		2610.97	276.59	2.30492		2610.97	373.978	353.116	2610.97	341.445	702.845	2610.97	297.87	1102.13	2610.97	357.95	1402.56
		2612.39	135.598	1.12998		2612.39	300.95	352.508	2612.39	147.834	701.232	2612.39	278.965	1101.99	2612.39	351.333	1402.51
		2613.8	302.314	2.51929		2613.8	250.336	352.086	2613.8	220.422	701.837	2613.8	152.844	1101.09	2613.8	424.198	1403.03
		2615.22	325.536	2.7128		2615.22	213.503	351.779	2615.22	213.481	701.779	2615.22	201.339	1101.44	2615.22	356.958	1402.55
		2616.64	179.234	1.49362		2616.64	354.788	352.957	2616.64	339.727	702.831	2616.64	99.3571	1100.71	2616.64	213.525	1401.53
		2618.05	197.218	1.64348		2618.05	108.547	350.905	2618.05	220.341	701.836	2618.05	109.788	1100.78	2618.05	232.624	1401.66
		2619.47	113.097	0.942476		2619.47	241.148	352.01	2619.47	118.209	700.985	2619.47	203.282	1101.45	2619.47	198.032	1401.41
		2620.89	224.51	1.87092		2620.89	250.88	352.091	2620.89	189.115	701.576	2620.89	203.345	1101.45	2620.89	305.305	1402.18
		2622.3	221.698	1.84748		2622.3	324.634	352.705	2622.3	268.702	702.239	2622.3	310.735	1102.22	2622.3	242.912	1401.74
		2623.72	69.9607	0.583006		2623.72	258.133	352.151	2623.72	324.077	702.701	2623.72	25.1134	1100.18	2623.72	230.66	1401.65
		2625.13	122.507	1.02089		2625.13	139.618	351.163	2625.13	225.338	701.878	2625.13	104.796	1100.75	2625.13	265.114	1401.89
		2626.55	104.04	0.867002		2626.55	339.746	352.831	2626.55	147.342	701.228	2626.55	207.025	1101.48	2626.55	141.905	1401.01
		2627.96	168.717	1.40597		2627.96	302.564	352.521	2627.96	173.267	701.444	2627.96	-71.8655	1099.49	2627.96	306.195	1402.19
		2629.38	113.837	0.94864		2629.38	204.684	351.706	2629.38	60.5702	700.505	2629.38	129.14	1100.92	2629.38	94.4693	1400.67
		2630.79	128.252	1.06876		2630.79	153.531	351.279	2630.79	157.547	701.313	2630.79	214.097	1101.53	2630.79	90.5971	1400.65
		2632.2	5.71024	0.0475853		2632.2	221.942	351.85	2632.2	133.212	701.11	2632.2	-28.5563	1099.8	2632.2	201.088	1401.44
		2633.62	-33.6663	-0.280553		2633.62	240.066	352.001	2633.62	185.158	701.543	2633.62	118.822	1100.85	2633.62	212.746	1401.52
		2635.03	143.714	1.19762		2635.03	202.671	351.689	2635.03	148.679	701.239	2635.03	136.191	1100.97	2635.03	207.016	1401.48
		2636.44	154.635	1.28862		2636.44	274.509	352.288	2636.44	82.6954	700.689	2636.44	115.406	1100.82	2636.44	-84.9759	1399.39
		2637.85	217.595	1.81329		2637.85	256.129	352.134	2637.85	13.2169	700.11	2637.85	87.6723	1100.63	2637.85	39.2607	1400.28
		2639.27	18.5435	0.154529		2639.27	152.683	351.272	2639.27	145.005	701.208	2639.27	111.989	1100.8	2639.27	213.819	1401.53
		2640.68	223.808	1.86507		2640.68	236.614	351.972	2640.68	266.432	702.22	2640.68	42.5909	1100.3	2640.68	239.133	1401.71
		2642.09	144.442	1.20368		2642.09	284.094	352.367	2642.09	0.786176	700.007	2642.09	183.221	1101.31	2642.09	207.129	1401.48
		2643.5	275.132	2.29277		2643.5	282.948	352.358	2643.5	143.072	701.192	2643.5	155.487	1101.11	2643.5	319.178	1402.28
		2644.91	148.84	1.24033		2644.91	273.089	352.276	2644.91	26.6526	700.222	2644.91	152.058	1101.09	2644.91	233.248	1401.67
		2646.32	302.15	2.51792		2646.32	218.036	351.817	2646.32	153.371	701.278	2646.32	211.163	1101.51	2646.32	100.336	1400.72
		2647.73	217.494	1.81245		2647.73	154.247	351.285	2647.73	297.515	702.479	2647.73	67.0248	1100.48	2647.73	115.005	1400.82
		2649.14	212.732	1.77277		2649.14	234.635	351.955	2649.14	278.377	702.32	2649.14	265.16	1101.89	2649.14	200.88	1401.43
		2650.55	247.938	2.06615		2650.55	429.738	353.581	2650.55	40.2414	700.335	2650.55	87.9622	1100.63	2650.55	251.984	1401.8
		2651.96	274.461	2.28718		2651.96	120.76	351.006	2651.96	24.528	700.204	2651.96	214.915	1101.54	2651.96	228.312	1401.63
		2653.37	273.169	2.27641		2653.37	154.164	351.285	2653.37	264.405	702.203	2653.37	192.394	1101.37	2653.37	256.749	1401.83
		2654.78	348.391	2.90326		2654.78	311.03	352.592	2654.78	309.605	702.58	2654.78	225.521	1101.61	2654.78	170.378	1401.22
		2656.19	397.546	3.31288		2656.19	290.512	352.421	2656.19	180.888	701.507	2656.19	152.562	1101.09	2656.19	252.654	1401.8
		2657.6	277.962	2.31635		2657.6	240.386	352.003	2657.6	398.336	703.319	2657.6	43.0462	1100.31	2657.6	207.915	1401.49
		2659.01	236.631	1.97192		2659.01	313.762	352.615	2659.01	149.529	701.246	2659.01	44.8618	1100.32	2659.01	359.751	1402.57
		2660.42	183.096	1.5258		2660.42	192.214	351.602	2660.42	109.482	700.912	2660.42	128.487	1100.92	2660.42	121.746	1400.87
		2661.82	42.5009	0.354175		2661.82	206.376	351.72	2661.82	13.7205	700.114	2661.82	243.487	1101.74	2661.82	94.2398	1400.67
		2663.23	187.391	1.56159		2663.23	123.018	351.025	2663.23	156.464	701.304	2663.23	25.9846	1100.19	2663.23	84.0976	1400.6
		2664.64	224.37	1.86975		2664.64	161.507	351.346	2664.64	351.516	702.929	2664.64	73.1097	1100.52	2664.64	120.927	1400.86
		2666.04	195.169	1.62641		2666.04	220.893	351.841	2666.04	238.348	701.986	2666.04	-5.14747	1099.96	2666.04	9.68065	1400.07
		2667.45	155.506	1.29588		2667.45	46.8281	350.39	2667.45	32.8097	700.273	2667.45	148.283	1101.06	2667.45	185.808	1401.33
		2668.86	225.605	1.88004		2668.86	88.7467	350.74	2668.86	153.049	701.275	2668.86	176.324	1101.26	2668.86	205.141	1401.47
		2670.26	128.416	1.07013		2670.26	132.404	351.103	2670.26	1.45683	700.012	2670.26	-34.3855	1099.75	2670.26	229.675	1401.64
		2671.67	181.105	1.50921		2671.67	132.478	351.104	2671.67	81.6611	700.681	2671.67	79.0698	1100.56	2671.67	126.928	1400.91
		2673.07	165.82	1.38183		2673.07	285.966	352.383	2673.07	146.215	701.218	2673.07	46.1245	1100.33	2673.07	346.658	1402.48
		2674.48	159.249	1.32708		2674.48	348.813	352.907	2674.48	80.0126	700.667	2674.48	75.9579	1100.54	2674.48	271.722	1401.94
		2675.88	119.54	0.996169		2675.88	108.167	350.901	2675.88	182.986	701.525	2675.88	2.90629	1100.02	2675.88	273.465	1401.95
		2677.29	55.3908	0.46159		2677.29	411.721	353.431	2677.29	193.548	701.613	2677.29	221.185	1101.58	2677.29	22.2142	1400.16
		2678.69	191.889	1.59907		2678.69	94.1806	350.785	2678.69	191.911	701.599	2678.69	132.456	1100.95	2678.69	214.04	1401.53
		2680.1	228.966	1.90805		2680.1	277.393	352.312	2680.1	319.436	702.662	2680.1	87.3377	1100.62	2680.1	21.9447	1400.16
		2681.5	231.146	1.92622		2681.5	231.984	351.933	2681.5	227.075	701.892	2681.5	-34.5894	1099.75	2681.5	25.2555	1400.18
		2682.9	252.541	2.10451		2682.9	265.111	352.209	2682.9	75.3273	700.628	2682.9	265.973	1101.9	2682.9	438.835	1403.13
		2684.31	310.621	2.58851		2684.31	336.654	352.805	2684.31	168.017	701.4	2684.31	95.167	1100.68	2684.31	148.783	1401.06
		2685.71	265.677	2.21397		2685.71	226.558	351.888	2685.71	264.25	702.202	2685.71	151.375	1101.08	2685.71	447.21	1403.19
		2687.11	260.904	2.1742		2687.11	357.492	352.979	2687.11	267.944	702.233	2687.11	99.3076	1100.71	2687.11	141.261	1401.01
		2688.52	390.682	3.25569		2688.52	317.223	352.644	2688.52	273.401	702.278	2688.52	288.37	1102.06	2688.52	285.976	1402.04
		2689.92	522.267	4.35222		2689.92	296.15	352.468	2689.92	343.542	702.863	2689.92	374.413	1102.67	2689.92	490.144	1403.5
		2691.32	360.242	3.00202		2691.32	364.206	353.035	2691.32	205.707	701.714	2691.32	262.978	1101.88	2691.32	405.934	1402.9
		2692.72	449.927	3.74939		2692.72	544.174	354.535	2692.72	344.08	702.867	2692.72	347.339	1102.48	2692.72	466.784	1403.33
		2694.12	471.461	3.92884		2694.12	411.179	353.426	2694.12	291.912	702.433	2694.12	335.57	1102.4	2694.12	375.486	1402.68
		2695.52	568.22	4.73516		2695.52	650.674	355.422	2695.52	451.378	703.761	2695.52	407.773	1102.91	2695.52	576.225	1404.12
		2696.92	551.317	4.59431		2696.92	475.641	353.964	2696.92	491.965	704.1	2696.92	560.497	1104	2696.92	721.035	1405.15
		2698.33	635.901	5.29918		2698.33	807.962	356.733	2698.33	683.066	705.692	2698.33	449.089	1103.21	2698.33	596.417	1404.26
		2699.72	694.284	5.7857		2699.72	811.384	356.762	2699.72	839.258	706.994	2699.72	587.922	1104.2	2699.72	604.729	1404.32
		2701.12	714.188	5.95157		2701.12	748.281	356.236	2701.12	666.444	705.554	2701.12	560.539	1104	2701.12	812.577	1405.8
		2702.52	865.425	7.21188		2702.52	870.731	357.256	2702.52	817.481	706.812	2702.52	895.585	1106.4	2702.52	906.68	1406.48
		2703.92	857.379	7.14483		2703.92	923.177	357.693	2703.92	1014.13	708.451	2703.92	852.536	1106.09	2703.92	710.108	1405.07
		2705.32	1047.26	8.72719		2705.32	1043.94	358.7	2705.32	1074.25	708.952	2705.32	820.002	1105.86	2705.32	1007.36	1407.2
		2706.72	1060.3	8.83585		2706.72	1129.72	359.414	2706.72	1139.68	709.497	2706.72	1144.86	1108.18	2706.72	1019.16	1407.28
		2708.12	1150.46	9.58713		2708.12	1133.17	359.443	2708.12	1103.53	709.196	2708.12	1024.8	1107.32	2708.12	1207.91	1408.63
		2709.52	1352.82	11.2735		2709.52	1406.5	361.721	2709.52	1326.76	711.056	2709.52	1192.15	1108.52	2709.52	1407.24	1410.05
		2710.92	1320.4	11.0033		2710.92	1569.51	363.079	2710.92	1614.96	713.458	2710.92	1291.22	1109.22	2710.92	1366.48	1409.76
		2712.31	1626.35	13.5529		2712.31	1653.68	363.781	2712.31	1510.57	712.588	2712.31	1430.68	1110.22	2712.31	1353.74	1409.67
		2713.71	1660.64	13.8387		2713.71	1850.12	365.418	2713.71	1714.79	714.29	2713.71	1631.59	1111.65	2713.71	1970.51	1414.08
		2715.11	2001.9	16.6825		2715.11	2083.46	367.362	2715.11	1945.43	716.212	2715.11	1590.57	1111.36	2715.11	1903.47	1413.6
		2716.51	1915.26	15.9605		2716.51	1955.51	366.296	2716.51	1997.24	716.644	2716.51	2024.97	1114.46	2716.51	1867.98	1413.34
		2717.9	2118.13	17.6511		2717.9	2220.55	368.505	2717.9	2096.48	717.471	2717.9	1978.8	1114.13	2717.9	2176.36	1415.55
		2719.3	2301.78	19.1815		2719.3	2280.36	369.003	2719.3	2304.58	719.205	2719.3	2062.51	1114.73	2719.3	2240.91	1416.01
		2720.69	2346.86	19.5572		2720.69	2399.87	369.999	2720.69	2349.56	719.58	2720.69	2160.32	1115.43	2720.69	2237.01	1415.98
		2722.09	2314.73	19.2894		2722.09	2482.56	370.688	2722.09	2298.01	719.15	2722.09	2193.24	1115.67	2722.09	2208.52	1415.78
		2723.49	2349.34	19.5779		2723.49	2463.44	370.529	2723.49	2408.03	720.067	2723.49	2217.42	1115.84	2723.49	2201.08	1415.72
		2724.88	2304.95	19.2079		2724.88	2400.41	370.003	2724.88	2342.48	719.521	2724.88	2178.42	1115.56	2724.88	2400.88	1417.15
		2726.28	2177.99	18.1499		2726.28	2242.49	368.687	2726.28	2289.23	719.077	2726.28	2077.94	1114.84	2726.28	2209.01	1415.78
		2727.67	2184.55	18.2046		2727.67	2137.23	367.81	2727.67	2225.44	718.545	2727.67	1880.82	1113.43	2727.67	2308.71	1416.49
		2729.07	1883.58	15.6965		2729.07	2118.04	367.65	2729.07	2026.34	716.886	2729.07	1760.97	1112.58	2729.07	2123.76	1415.17
		2730.46	1668.66	13.9055		2730.46	2017.99	366.817	2730.46	1595.17	713.293	2730.46	1721.97	1112.3	2730.46	1768.22	1412.63
		2731.85	1476.52	12.3044		2731.85	1733.31	364.444	2731.85	1545.36	712.878	2731.85	1384.1	1109.89	2731.85	1716.68	1412.26
		2733.25	1257.96	10.483		2733.25	1149.6	359.58	2733.25	1428.74	711.906	2733.25	1167.47	1108.34	2733.25	1225.51	1408.75
		2734.64	1134.31	9.45261		2734.64	1114.39	359.287	2734.64	1282.21	710.685	2734.64	1128.42	1108.06	2734.64	1194.95	1408.54
		2736.03	1088.04	9.06702		2736.03	1135.47	359.462	2736.03	1091.68	709.097	2736.03	783.308	1105.6	2736.03	1020.12	1407.29
		2737.43	886.948	7.39124		2737.43	947.196	357.893	2737.43	920.454	707.67	2737.43	805.817	1105.76	2737.43	845.213	1406.04
		2738.82	673.484	5.61236		2738.82	593.431	354.945	2738.82	603.13	705.026	2738.82	610.152	1104.36	2738.82	825.103	1405.89
		2740.21	729.268	6.07723		2740.21	607.411	355.062	2740.21	648.308	705.403	2740.21	539.416	1103.85	2740.21	750.416	1405.36
		2741.6	445.322	3.71102		2741.6	538.661	354.489	2741.6	475.234	703.96	2741.6	392.986	1102.81	2741.6	534.863	1403.82
		2742.99	502.901	4.19084		2742.99	443.484	353.696	2742.99	293.322	702.444	2742.99	350.423	1102.5	2742.99	676.677	1404.83
		2744.38	356.235	2.96862		2744.38	501.506	354.179	2744.38	125.461	701.046	2744.38	448.776	1103.21	2744.38	406.425	1402.9
		2745.78	308.184	2.5682		2745.78	312.947	352.608	2745.78	255.272	702.127	2745.78	365.765	1102.61	2745.78	289.326	1402.07
		2747.17	182.624	1.52186		2747.17	288.183	352.402	2747.17	240.694	702.006	2747.17	101.281	1100.72	2747.17	253.23	1401.81
		2748.56	187.45	1.56209		2748.56	122.444	351.02	2748.56	125.7	701.047	2748.56	164.509	1101.18	2748.56	273.516	1401.95
		2749.95	179.972	1.49977		2749.95	118.812	350.99	2749.95	151.703	701.264	2749.95	-4.86231	1099.97	2749.95	200.398	1401.43
		2751.34	126.688	1.05574		2751.34	259.756	352.165	2751.34	79.029	700.659	2751.34	150.117	1101.07	2751.34	211.877	1401.51
		2752.73	52.2565	0.435471		2752.73	129.225	351.077	2752.73	-43.0072	699.642	2752.73	-6.90507	1099.95	2752.73	-94.025	1399.33
		2754.12	34.2648	0.28554		2754.12	286.132	352.384	2754.12	67.7462	700.565	2754.12	45.923	1100.33	2754.12	241.924	1401.73
		2755.51	100.972	0.841435		2755.51	187.342	351.561	2755.51	23.351	700.195	2755.51	-51.1284	1099.63	2755.51	-48.2026	1399.66
		2756.9	176.56	1.47133		2756.9	137.932	351.149	2756.9	33.6734	700.281	2756.9	-17.6168	1099.87	2756.9	227.919	1401.63
		2758.28	153.392	1.27827		2758.28	70.8747	350.591	2758.28	-81.2532	699.323	2758.28	-88.1682	1099.37	2758.28	6.51853	1400.05
		2759.67	50.8261	0.423551		2759.67	169.722	351.414	2759.67	-12.6236	699.895	2759.67	86.6296	1100.62	2759.67	-50.8132	1399.64
		2761.06	24.1647	0.201372		2761.06	-1.47227	349.988	2761.06	-123.992	698.967	2761.06	21.4498	1100.15	2761.06	202.552	1401.45
		2762.45	129.96	1.083		2762.45	95.676	350.797	2762.45	66.5733	700.555	2762.45	-86.0937	1099.39	2762.45	124.074	1400.89
		2763.84	30.9696	0.25808		2763.84	-52.5988	349.562	2763.84	-44.7413	699.627	2763.84	-78.8429	1099.44	2763.84	176.267	1401.26
		2765.22	-60.9546	-0.507955		2765.22	-31.3342	349.739	2765.22	-115.43	699.038	2765.22	-9.72375	1099.93	2765.22	235.558	1401.68
		2766.61	-6.2375	-0.0519792		2766.61	95.968	350.8	2766.61	100.113	700.834	2766.61	126.604	1100.9	2766.61	185.352	1401.32
		2768	45.0069	0.375057		2768	126.153	351.051	2768	-37.6398	699.686	2768	-138.106	1099.01	2768	87.4276	1400.62
		2769.38	25.6142	0.213452		2769.38	7.90717	350.066	2769.38	64.97	700.541	2769.38	-139.529	1099	2769.38	238.691	1401.7
		2770.77	-94.5131	-0.787609		2770.77	-37.8792	349.684	2770.77	-35.6308	699.703	2770.77	-132.065	1099.06	2770.77	-4.18484	1399.97
		2772.16	27.5908	0.229923		2772.16	64.8669	350.541	2772.16	-21.2971	699.823	2772.16	-46.7594	1099.67	2772.16	28.6908	1400.2
		2773.54	-4.07592	-0.033966		2773.54	-9.17041	349.924	2773.54	-58.1998	699.515	2773.54	-72.7901	1099.48	2773.54	185.394	1401.32
		2774.93	127.022	1.05851		2774.93	-104.436	349.13	2774.93	-6.62893	699.945	2774.93	-79.3298	1099.43	2774.93	36.1666	1400.26
		2776.31	15.8309	0.131924		2776.31	55.0533	350.459	2776.31	-62.9112	699.476	2776.31	20.3266	1100.15	2776.31	168.208	1401.2
		2777.7	33.8171	0.281809		2777.7	-169.357	348.589	2777.7	70.1707	700.585	2777.7	-46.2714	1099.67	2777.7	222.459	1401.59
		2779.08	136.81	1.14008		2779.08	22.0972	350.184	2779.08	47.6006	700.397	2779.08	-8.42713	1099.94	2779.08	44.8963	1400.32
		2780.46	11.5232	0.096027		2780.46	-16.4735	349.863	2780.46	41.0031	700.342	2780.46	-48.4101	1099.65	2780.46	-77.8316	1399.44
		2781.85	24.3387	0.202823		2781.85	72.4529	350.604	2781.85	-2.73279	699.977	2781.85	9.01765	1100.06	2781.85	242.062	1401.73
		2783.23	-30.0921	-0.250768		2783.23	-6.79327	349.943	2783.23	-74.772	699.377	2783.23	-27.3439	1099.8	2783.23	80.4104	1400.57
		2784.62	27.0918	0.225765		2784.62	-36.4428	349.696	2784.62	-68.8543	699.426	2784.62	-15.8478	1099.89	2784.62	1.97303	1400.01
		2786	-78.6457	-0.655381		2786	13.6518	350.114	2786	-46.9409	699.609	2786	-29.1033	1099.79	2786	12.1109	1400.09
		2787.38	72.5585	0.604654		2787.38	221.506	351.846	2787.38	42.3668	700.353	2787.38	-67.1245	1099.52	2787.38	41.7713	1400.3
		2788.76	113.984	0.949867		2788.76	62.6029	350.522	2788.76	41.3712	700.345	2788.76	40.2187	1100.29	2788.76	25.3925	1400.18
		2790.15	-62.5668	-0.52139		2790.15	33.0774	350.276	2790.15	-5.66371	699.953	2790.15	-8.3428	1099.94	2790.15	-19.3263	1399.86
		2791.53	58.7302	0.489419		2791.53	92.227	350.769	2791.53	-141.318	698.822	2791.53	-165.032	1098.82	2791.53	44.1201	1400.32
		2792.91	128.695	1.07246		2792.91	0.6983	350.006	2792.91	-101.411	699.155	2792.91	-2.52392	1099.98	2792.91	196.29	1401.4
		2794.29	124.239	1.03532		2794.29	-21.6549	349.82	2794.29	73.3678	700.611	2794.29	67.8631	1100.48	2794.29	196.013	1401.4
		2795.67	80.8011	0.673343		2795.67	163.587	351.363	2795.67	102.793	700.857	2795.67	10.5925	1100.08	2795.67	286.241	1402.04
		2797.05	81.7564	0.681303		2797.05	150.204	351.252	2797.05	141.154	701.176	2797.05	-78.5902	1099.44	2797.05	257.652	1401.84
		2798.44	166.176	1.3848		2798.44	250.439	352.087	2798.44	247.025	702.059	2798.44	4.39448	1100.03	2798.44	291.204	1402.08
		2799.82	103.344	0.861199		2799.82	230.045	351.917	2799.82	5.06803	700.042	2799.82	-104.25	1099.26	2799.82	340.779	1402.43
		2801.2	111.557	0.929645		2801.2	174.172	351.451	2801.2	107.509	700.896	2801.2	183.042	1101.31	2801.2	475.629	1403.4
		2802.58	350.682	2.92235		2802.58	304.779	352.54	2802.58	217.149	701.81	2802.58	205.901	1101.47	2802.58	182.595	1401.3
		2803.96	266.689	2.22241		2803.96	257.861	352.149	2803.96	37.3714	700.311	2803.96	102.712	1100.73	2803.96	417.006	1402.98
		2805.33	353.262	2.94385		2805.33	239.389	351.995	2805.33	219.986	701.833	2805.33	123.887	1100.88	2805.33	216.295	1401.54
		2806.71	324.426	2.70355		2806.71	412.854	353.44	2806.71	241.033	702.009	2806.71	214.421	1101.53	2806.71	525.506	1403.75
		2808.09	322.288	2.68574		2808.09	261.199	352.177	2808.09	358.115	702.984	2808.09	317.484	1102.27	2808.09	291.048	1402.08
		2809.47	416.192	3.46827		2809.47	365.497	353.046	2809.47	500.184	704.168	2809.47	123.785	1100.88	2809.47	484.932	1403.46
		2810.85	433.737	3.61448		2810.85	505.438	354.212	2810.85	629.919	705.249	2810.85	479.436	1103.42	2810.85	419.353	1403
		2812.23	593.604	4.9467		2812.23	620.583	355.172	2812.23	679.741	705.665	2812.23	424.501	1103.03	2812.23	465.821	1403.33
		2813.61	668.216	5.56846		2813.61	518.827	354.324	2813.61	614.029	705.117	2813.61	584.809	1104.18	2813.61	649.301	1404.64
		2814.98	666.415	5.55346		2814.98	703.488	355.862	2814.98	882.796	707.357	2814.98	579.79	1104.14	2814.98	740.39	1405.29
		2816.36	839.044	6.99203		2816.36	877.592	357.313	2816.36	703.336	705.861	2816.36	781.22	1105.58	2816.36	801.305	1405.72
		2817.74	800.015	6.66679		2817.74	859.609	357.163	2817.74	854.881	707.124	2817.74	715.834	1105.11	2817.74	1040.26	1407.43
		2819.11	1003.11	8.35925		2819.11	1105.11	359.209	2819.11	1070.63	708.922	2819.11	796.436	1105.69	2819.11	1147.62	1408.2
		2820.49	1234.83	10.2902		2820.49	1146.01	359.55	2820.49	1074.65	708.955	2820.49	1058.72	1107.56	2820.49	1345.87	1409.61
		2821.87	1415.05	11.7921		2821.87	1406	361.717	2821.87	1251.46	710.429	2821.87	1235.68	1108.83	2821.87	1211.25	1408.65
		2823.24	1643.49	13.6958		2823.24	1534.34	362.786	2823.24	1692	714.1	2823.24	1546.35	1111.05	2823.24	1826.45	1413.05
		2824.62	1930.87	16.0905		2824.62	1769.67	364.747	2824.62	2095.36	717.461	2824.62	1629.18	1111.64	2824.62	1944.92	1413.89
		2825.99	2471.42	20.5952		2825.99	2147.68	367.897	2825.99	2299.39	719.162	2825.99	2004.29	1114.32	2825.99	2163.27	1415.45
		2827.37	2784.14	23.2011		2827.37	2461.73	370.514	2827.37	2585.52	721.546	2827.37	2365.35	1116.9	2827.37	2649.06	1418.92
		2828.74	3221.81	26.8484		2828.74	3130.67	376.089	2828.74	3271.11	727.259	2828.74	2958.33	1121.13	2828.74	3090.53	1422.08
		2830.12	4060.84	33.8403		2830.12	3803.48	381.696	2830.12	3841.14	732.009	2830.12	3423.23	1124.45	2830.12	3845.99	1427.47
		2831.49	5003.68	41.6974		2831.49	4426.68	386.889	2831.49	4545.19	737.877	2831.49	4407.27	1131.48	2831.49	4507.29	1432.19
		2832.87	6114.61	50.9551		2832.87	5784.99	398.208	2832.87	5873.8	748.948	2832.87	5521.94	1139.44	2832.87	5796.7	1441.4
		2834.24	7614.91	63.4576		2834.24	7329.4	411.078	2834.24	7224.41	760.203	2834.24	6974.26	1149.82	2834.24	6931.46	1449.51
		2835.61	9422.74	78.5228		2835.61	9049.32	425.411	2835.61	8823.61	773.53	2835.61	8630.6	1161.65	2835.61	8769.69	1462.64
		2836.99	11531.1	96.0929		2836.99	11050.1	442.085	2836.99	10987.4	791.562	2836.99	10680.2	1176.29	2836.99	10649.7	1476.07
		2838.36	14283	119.025		2838.36	13671.2	463.926	2838.36	13348.5	811.237	2838.36	13148.4	1193.92	2838.36	13010.7	1492.93
		2839.73	17366.3	144.719		2839.73	16570	488.083	2839.73	16646	838.717	2839.73	15722.9	1212.31	2839.73	16395.6	1517.11
		2841.1	20986.5	174.888		2841.1	20164.6	518.038	2841.1	19896.7	865.805	2841.1	19550.2	1239.64	2841.1	19633.7	1540.24
		2842.48	25004.7	208.373		2842.48	23578.5	546.488	2842.48	23859.5	898.829	2842.48	23079	1264.85	2842.48	23360.7	1566.86
		2843.85	29435.4	245.295		2843.85	27695.8	580.799	2843.85	28215.1	935.126	2843.85	26854	1291.81	2843.85	27803.7	1598.6
		2845.22	33208.6	276.738		2845.22	31800.6	615.005	2845.22	32267	968.892	2845.22	30909.3	1320.78	2845.22	31635.7	1625.97
		2846.59	36070.2	300.585		2846.59	34795.4	639.962	2846.59	36065	1000.54	2846.59	33961.8	1342.58	2846.59	34904.5	1649.32
		2847.96	37422.6	311.855		2847.96	36967.5	658.063	2847.96	38016.4	1016.8	2847.96	35757.4	1355.41	2847.96	37257.8	1666.13
		2849.33	37951.5	316.263		2849.33	37311.7	660.931	2849.33	38938.9	1024.49	2849.33	35760.6	1355.43	2849.33	37938.7	1670.99
		2850.7	36864.3	307.202		2850.7	36776.3	656.469	2850.7	38238.3	1018.65	2850.7	35043.2	1350.31	2850.7	36960.6	1664
		2852.07	35268.8	293.907		2852.07	34427.4	636.895	2852.07	36552	1004.6	2852.07	33667.5	1340.48	2852.07	35413.5	1652.95
		2853.44	32962.6	274.688		2853.44	32871.8	623.931	2853.44	34067.4	983.895	2853.44	31568.7	1325.49	2853.44	33018	1635.84
		2854.81	30922.1	257.684		2854.81	30263.6	602.197	2854.81	31914.6	965.955	2854.81	29556.8	1311.12	2854.81	30768.3	1619.77
		2856.18	28775.3	239.794		2856.18	28567.1	588.059	2856.18	29775.4	948.128	2856.18	26794.3	1291.39	2856.18	28854.1	1606.1
		2857.55	26754.8	222.957		2857.55	26277.6	568.98	2857.55	27776.8	931.473	2857.55	25457.3	1281.84	2857.55	26753.2	1591.09
		2858.92	25245.6	210.38		2858.92	24536.8	554.473	2858.92	25786.4	914.886	2858.92	24001.7	1271.44	2858.92	24728.4	1576.63
		2860.29	23827.1	198.56		2860.29	23169.6	543.08	2860.29	24457.7	903.815	2860.29	22151.6	1258.23	2860.29	23388.7	1567.06
		2861.66	22744.9	189.541		2861.66	21673	530.608	2861.66	22663	888.859	2861.66	21092.4	1250.66	2861.66	21969.7	1556.93
		2863.03	21400.8	178.34		2863.03	21017.7	525.147	2863.03	21616.4	880.137	2863.03	20204.9	1244.32	2863.03	20804.6	1548.6
		2864.39	20299.8	169.165		2864.39	19948.4	516.236	2864.39	20721.8	872.681	2864.39	19200.5	1237.15	2864.39	19882.7	1542.02
		2865.76	19922.4	166.02		2865.76	19170.8	509.756	2865.76	19828.6	865.238	2865.76	18805.1	1234.32	2865.76	19245.4	1537.47
		2867.13	19414.2	161.785		2867.13	18982.6	508.188	2867.13	19200.4	860.003	2867.13	18345.1	1231.04	2867.13	18358.8	1531.13
		2868.49	19493.7	162.448		2868.49	18355.2	502.96	2868.49	18749.5	856.245	2868.49	18012.2	1228.66	2868.49	18167.4	1529.77
		2869.86	19053.4	158.778		2869.86	18597.2	504.977	2869.86	18560.2	854.668	2869.86	17874.7	1227.68	2869.86	17952.7	1528.23
		2871.23	19296.2	160.802		2871.23	18342.6	502.855	2871.23	18505.4	854.212	2871.23	18547.7	1232.48	2871.23	18238.4	1530.27
		2872.59	20141.9	167.849		2872.59	19114	509.283	2872.59	18639	855.325	2872.59	18880.3	1234.86	2872.59	18595.9	1532.83
		2873.96	21022	175.184		2873.96	20187.1	518.226	2873.96	19357.6	861.313	2873.96	19390.7	1238.5	2873.96	18925	1535.18
		2875.33	22198.7	184.989		2875.33	21162	526.35	2875.33	20464.1	870.534	2875.33	20918.7	1249.42	2875.33	19927.1	1542.34
		2876.69	24361.1	203.01		2876.69	23670.1	547.251	2876.69	22342.8	886.19	2876.69	23267.6	1266.2	2876.69	21805.4	1555.75
		2878.06	27948	232.9		2878.06	27459.1	578.825	2878.06	25595.6	913.297	2878.06	26664	1290.46	2878.06	24729.4	1576.64
		2879.42	33339	277.825		2879.42	33818.9	631.824	2879.42	30878.5	957.321	2879.42	32121.1	1329.44	2879.42	30261.5	1616.15
		2880.79	39734.1	331.118		2880.79	41763.3	698.027	2880.79	39153.6	1026.28	2880.79	39067.3	1379.05	2880.79	37904	1670.74
		2882.15	44887.2	374.06		2882.15	49964.1	766.368	2882.15	48103.7	1100.86	2882.15	45452.3	1424.66	2882.15	45926.8	1728.05
		2883.51	44893.6	374.113		2883.51	52437.5	786.979	2883.51	53033.2	1141.94	2883.51	46890.5	1434.93	2883.51	49811.9	1755.8
		2884.88	39160.9	326.341		2884.88	47959.9	749.666	2884.88	50457.5	1120.48	2884.88	42004.5	1400.03	2884.88	47019.7	1735.85
		2886.24	32556.2	271.302		2886.24	40010.2	683.419	2886.24	43641.4	1063.68	2886.24	35010.3	1350.07	2886.24	40930.4	1692.36
		2887.6	26608.7	221.74		2887.6	32893.4	624.112	2887.6	36930.4	1007.75	2887.6	28703.6	1305.03	2887.6	34008.4	1642.92
		2888.97	22708.6	189.238		2888.97	28359.2	586.326	2888.97	31083.5	959.029	2888.97	24384.9	1274.18	2888.97	29207	1608.62
		2890.33	20450.6	170.421		2890.33	25001.1	558.343	2890.33	27811.3	931.761	2890.33	21648.7	1254.63	2890.33	26072.5	1586.23
		2891.69	18853.6	157.113		2891.69	22960.2	541.335	2891.69	25683.5	914.029	2891.69	20147.1	1243.91	2891.69	23998.1	1571.41
		2893.05	18342.6	152.855		2893.05	21960.1	533.001	2893.05	24319.5	902.663	2893.05	19107.4	1236.48	2893.05	22959.1	1563.99
		2894.42	17770.4	148.086		2894.42	21092.8	525.773	2894.42	23277.1	893.976	2894.42	18740.2	1233.86	2894.42	21885.5	1556.33
		2895.78	17102.6	142.521		2895.78	20198.2	518.319	2895.78	22954.2	891.285	2895.78	18079.6	1229.14	2895.78	21347.9	1552.48
		2897.14	17156.4	142.97		2897.14	20126	517.717	2897.14	22148.9	884.574	2897.14	17604.2	1225.74	2897.14	21170.1	1551.22
		2898.5	17188.6	143.239		2898.5	19448.9	512.074	2898.5	21683.6	880.696	2898.5	17648.9	1226.06	2898.5	20679.1	1547.71
		2899.86	16650.2	138.751		2899.86	18969.7	508.08	2899.86	21092.1	875.767	2899.86	17385.8	1224.18	2899.86	20153.7	1543.95
		2901.22	16118.7	134.323		2901.22	18508.3	504.236	2901.22	20455.3	870.461	2901.22	16686.7	1219.19	2901.22	19689.3	1540.64
		2902.58	15934.9	132.791		2902.58	17764	498.033	2902.58	20059.8	867.165	2902.58	16291.9	1216.37	2902.58	18760.1	1534
		2903.94	15331.2	127.76		2903.94	17165.4	493.045	2903.94	19419.2	861.827	2903.94	15421.3	1210.15	2903.94	18227	1530.19
		2905.3	14757.9	122.983		2905.3	16350.4	486.253	2905.3	18681.1	855.675	2905.3	15013.6	1207.24	2905.3	17594.6	1525.68
		2906.66	13887.1	115.726		2906.66	15845.2	482.043	2906.66	17812.9	848.441	2906.66	14010.9	1200.08	2906.66	16870	1520.5
		2908.02	13472.2	112.268		2908.02	14941.4	474.511	2908.02	16659.6	838.83	2908.02	13691.2	1197.79	2908.02	15956	1513.97
		2909.38	12930.9	107.757		2909.38	14177.9	468.149	2909.38	15920.7	832.672	2909.38	12879.1	1191.99	2909.38	15234.6	1508.82
		2910.74	12319.1	102.659		2910.74	13426.9	461.891	2910.74	15396.1	828.301	2910.74	12220.1	1187.29	2910.74	14289.3	1502.07
		2912.1	11584.5	96.5373		2912.1	12657.6	455.48	2912.1	14243.6	818.697	2912.1	11609.5	1182.92	2912.1	13832.5	1498.8
		2913.46	10954.3	91.2857		2913.46	12274.1	452.284	2913.46	13974.9	816.457	2913.46	11144.9	1179.61	2913.46	13041.9	1493.16
		2914.81	10666.8	88.8898		2914.81	11683	447.359	2914.81	13361.4	811.345	2914.81	10635	1175.96	2914.81	12449.4	1488.92
		2916.17	10464.1	87.2005		2916.17	11373.4	444.778	2916.17	12552.7	804.606	2916.17	10363.2	1174.02	2916.17	12152.8	1486.81
		2917.53	10153	84.6084		2917.53	10812.7	440.106	2917.53	12319.7	802.664	2917.53	9872.96	1170.52	2917.53	11670.2	1483.36
		2918.88	9856.33	82.1361		2918.88	10721.3	439.344	2918.88	11960.3	799.669	2918.88	9839.36	1170.28	2918.88	11552.2	1482.52
		2920.24	9621.01	80.1751		2920.24	10590.3	438.252	2920.24	11813.9	798.449	2920.24	9549.35	1168.21	2920.24	11154.3	1479.67
		2921.6	9784.86	81.5405		2921.6	10459.2	437.16	2921.6	11434.5	795.287	2921.6	9569.95	1168.36	2921.6	11047.1	1478.91
		2922.96	9533.3	79.4442		2922.96	10317.3	435.978	2922.96	11443.4	795.361	2922.96	9487.63	1167.77	2922.96	11348.2	1481.06
		2924.31	9511.19	79.26		2924.31	10217	435.142	2924.31	11394.5	794.954	2924.31	9183.04	1165.59	2924.31	10708	1476.49
		2925.67	9393.35	78.2779		2925.67	10299.3	435.827	2925.67	11381.8	794.849	2925.67	9326.62	1166.62	2925.67	11096	1479.26
		2927.02	9353.25	77.9437		2927.02	10077.9	433.982	2927.02	11340.3	794.502	2927.02	9134.04	1165.24	2927.02	10950.9	1478.22
		2928.38	9253.53	77.1128		2928.38	9943.29	432.861	2928.38	11213.8	793.448	2928.38	9142.13	1165.3	2928.38	10767.8	1476.91
		2929.73	9282.23	77.3519		2929.73	9906.34	432.553	2929.73	11152.4	792.937	2929.73	9029.1	1164.49	2929.73	10479.8	1474.86
		2931.09	9034.25	75.2854		2931.09	9733.78	431.115	2931.09	10803.4	790.028	2931.09	8874.46	1163.39	2931.09	10376.2	1474.12
		2932.44	8487.72	70.731		2932.44	9584.74	429.873	2932.44	10532.2	787.768	2932.44	8491.84	1160.66	2932.44	9869.21	1470.49
		2933.8	8263.13	68.8595		2933.8	8815.02	423.459	2933.8	10253.6	785.447	2933.8	8402.26	1160.02	2933.8	9588.23	1468.49
		2935.15	7797.81	64.9817		2935.15	8531.92	421.099	2935.15	9768.66	781.406	2935.15	7666.56	1154.76	2935.15	9160.59	1465.43
		2936.5	7435.53	61.9628		2936.5	7910.26	415.919	2936.5	9073.59	775.613	2936.5	7343.33	1152.45	2936.5	8511.97	1460.8
		2937.86	6950.06	57.9172		2937.86	7282.97	410.691	2937.86	8318.54	769.321	2937.86	6994.67	1149.96	2937.86	8140.15	1458.14
		2939.21	6384.77	53.2064		2939.21	6880.05	407.334	2939.21	7976.14	766.468	2939.21	6350.72	1145.36	2939.21	7521.93	1453.73
		2940.56	5754.11	47.9509		2940.56	6299.53	402.496	2940.56	7381.88	761.516	2940.56	5706.56	1140.76	2940.56	6863.67	1449.03
		2941.92	5204.78	43.3732		2941.92	5550.34	396.253	2941.92	6372.57	753.105	2941.92	5176.31	1136.97	2941.92	6232.36	1444.52
		2943.27	4541.15	37.8429		2943.27	4960.38	391.337	2943.27	5669.14	747.243	2943.27	4665.83	1133.33	2943.27	5493.93	1439.24
		2944.62	3998.73	33.3227		2944.62	4352.12	386.268	2944.62	5070.58	742.255	2944.62	4012	1128.66	2944.62	4854.92	1434.68
		2945.97	3494.22	29.1185		2945.97	3865.12	382.209	2945.97	4210.81	735.09	2945.97	3332.57	1123.8	2945.97	3862.22	1427.59
		2947.32	2995.01	24.9584		2947.32	3104.21	375.868	2947.32	3671.66	730.597	2947.32	2807.02	1120.05	2947.32	3518.24	1425.13
		2948.67	2428.57	20.2381		2948.67	2533.47	371.112	2948.67	3101.52	725.846	2948.67	2252.29	1116.09	2948.67	2829.61	1420.21
		2950.03	2101.37	17.5114		2950.03	2285.42	369.045	2950.03	2591.05	721.592	2950.03	1953.11	1113.95	2950.03	2385.6	1417.04
		2951.38	1723.3	14.3609		2951.38	1756.12	364.634	2951.38	2131.21	717.76	2951.38	1742.73	1112.45	2951.38	2110.16	1415.07
		2952.73	1408.65	11.7387		2952.73	1551.46	362.929	2952.73	1674.86	713.957	2952.73	1354.49	1109.67	2952.73	1691.3	1412.08
		2954.08	1159.25	9.66042		2954.08	1323.17	361.026	2954.08	1523.25	712.694	2954.08	1243.79	1108.88	2954.08	1442.89	1410.31
		2955.43	1094.96	9.12468		2955.43	1230.99	360.258	2955.43	1565.86	713.049	2955.43	1045.95	1107.47	2955.43	1199.86	1408.57
		2956.78	952.628	7.93856		2956.78	953.635	357.947	2956.78	1334.38	711.12	2956.78	967.883	1106.91	2956.78	993.072	1407.09
		2958.13	781.235	6.51029		2958.13	926.813	357.723	2958.13	1006.59	708.388	2958.13	802.654	1105.73	2958.13	886.1	1406.33
		2959.48	742.407	6.18673		2959.48	854.618	357.122	2959.48	1021.98	708.517	2959.48	820.822	1105.86	2959.48	737.33	1405.27
		2960.83	769.016	6.40846		2960.83	786.082	356.551	2960.83	973.839	708.115	2960.83	746.386	1105.33	2960.83	833.775	1405.96
		2962.17	599.449	4.99541		2962.17	628.53	355.238	2962.17	734.927	706.124	2962.17	544.755	1103.89	2962.17	828.522	1405.92
		2963.52	580.701	4.83918		2963.52	534.57	354.455	2963.52	719.485	705.996	2963.52	512.081	1103.66	2963.52	525.251	1403.75
		2964.87	523.819	4.36516		2964.87	582.391	354.853	2964.87	654.987	705.458	2964.87	463.054	1103.31	2964.87	443.628	1403.17
		2966.22	446.964	3.7247		2966.22	423.023	353.525	2966.22	590.497	704.921	2966.22	441.304	1103.15	2966.22	432.895	1403.09
		2967.57	355.579	2.96315		2967.57	454.566	353.788	2967.57	571.472	704.762	2967.57	332.288	1102.37	2967.57	396.718	1402.83
		2968.91	353.321	2.94434		2968.91	229.725	351.914	2968.91	463.354	703.861	2968.91	341.47	1102.44	2968.91	318.713	1402.28
		2970.26	385.665	3.21388		2970.26	224.943	351.875	2970.26	355.217	702.96	2970.26	317.929	1102.27	2970.26	353.467	1402.52
		2971.61	316.183	2.63486		2971.61	214.748	351.79	2971.61	412.642	703.439	2971.61	307.143	1102.19	2971.61	388.257	1402.77
		2972.95	288.564	2.4047		2972.95	304.667	352.539	2972.95	248.09	702.067	2972.95	270.885	1101.93	2972.95	288.393	1402.06
		2974.3	266.443	2.22036		2974.3	167.151	351.393	2974.3	230.939	701.924	2974.3	83.5678	1100.6	2974.3	254.034	1401.81
		2975.65	233.427	1.94523		2975.65	382.791	353.19	2975.65	341.235	702.844	2975.65	198.393	1101.42	2975.65	206.921	1401.48
		2976.99	244.146	2.03455		2976.99	136.065	351.134	2976.99	371.49	703.096	2976.99	202.217	1101.44	2976.99	296.368	1402.12
		2978.34	287.681	2.39734		2978.34	324.535	352.704	2978.34	225.11	701.876	2978.34	63.9929	1100.46	2978.34	274.748	1401.96
		2979.68	138.194	1.15162		2979.68	259.927	352.166	2979.68	275.431	702.295	2979.68	220.832	1101.58	2979.68	236.739	1401.69
		2981.03	243.75	2.03125		2981.03	220.83	351.84	2981.03	159.993	701.333	2981.03	78.9488	1100.56	2981.03	360.863	1402.58
		2982.37	298.363	2.48636		2982.37	391.313	353.261	2982.37	348.85	702.907	2982.37	297.835	1102.13	2982.37	403.034	1402.88
		2983.72	241.855	2.01546		2983.72	224.713	351.873	2983.72	105.84	700.882	2983.72	321.801	1102.3	2983.72	317.641	1402.27
		2985.06	218.17	1.81808		2985.06	273.187	352.277	2985.06	263.801	702.198	2985.06	183.539	1101.31	2985.06	-1.13439	1399.99
		2986.41	181.754	1.51462		2986.41	117.505	350.979	2986.41	226.754	701.89	2986.41	236.693	1101.69	2986.41	216.031	1401.54
		2987.75	240.186	2.00155		2987.75	156.922	351.308	2987.75	82.1041	700.684	2987.75	257.047	1101.84	2987.75	48.4736	1400.35
		2989.09	216.588	1.8049		2989.09	203.676	351.697	2989.09	340.519	702.838	2989.09	335.783	1102.4	2989.09	121.61	1400.87
		2990.44	176.6	1.47167		2990.44	299.742	352.498	2990.44	270.667	702.256	2990.44	151.855	1101.08	2990.44	275.051	1401.96
		2991.78	184.067	1.5339		2991.78	176.898	351.474	2991.78	295.68	702.464	2991.78	115.664	1100.83	2991.78	393.866	1402.81
		2993.12	215.296	1.79414		2993.12	311.373	352.595	2993.12	317.066	702.642	2993.12	150.646	1101.08	2993.12	308.306	1402.2
		2994.46	199.101	1.65918		2994.46	190.357	351.586	2994.46	185.125	701.543	2994.46	23.1779	1100.17	2994.46	111.341	1400.8
		2995.81	102.599	0.854992		2995.81	193.48	351.612	2995.81	160.875	701.341	2995.81	196.934	1101.41	2995.81	116.961	1400.84
		2997.15	221.571	1.84643		2997.15	134.534	351.121	2997.15	187.749	701.565	2997.15	273.971	1101.96	2997.15	73.2542	1400.52
		2998.49	165.272	1.37726		2998.49	194.311	351.619	2998.49	263.959	702.2	2998.49	71.5841	1100.51	2998.49	219.474	1401.57
		2999.83	150.991	1.25826		2999.83	248.648	352.072	2999.83	186.74	701.556	2999.83	77.3819	1100.55	2999.83	159.288	1401.14
		3001.17	321.281	2.67734		3001.17	303.026	352.525	3001.17	264.811	702.207	3001.17	159.929	1101.14	3001.17	226.966	1401.62
		3002.51	53.0416	0.442014		3002.51	158.238	351.319	3002.51	116.297	700.969	3002.51	216.926	1101.55	3002.51	192.305	1401.37
		3003.85	152.139	1.26783		3003.85	62.7674	350.523	3003.85	214.501	701.788	3003.85	144.162	1101.03	3003.85	265.458	1401.9
		3005.19	92.237	0.768641		3005.19	131.825	351.099	3005.19	285.322	702.378	3005.19	235.919	1101.69	3005.19	126.533	1400.9
		3006.53	151.191	1.25993		3006.53	63.7698	350.531	3006.53	189.755	701.581	3006.53	161.297	1101.15	3006.53	29.5805	1400.21
		3007.87	146.175	1.21812		3007.87	129.221	351.077	3007.87	256.934	702.141	3007.87	168.951	1101.21	3007.87	139.24	1400.99
		3009.21	161.294	1.34412		3009.21	143.484	351.196	3009.21	186.928	701.558	3009.21	156.477	1101.12	3009.21	65.9712	1400.47
		3010.55	53.8531	0.448776		3010.55	112.029	350.934	3010.55	153.494	701.279	3010.55	162.3	1101.16	3010.55	128.051	1400.91
		3011.89	94.6199	0.788499		3011.89	159.26	351.327	3011.89	218.86	701.824	3011.89	93.081	1100.66	3011.89	87.6296	1400.63
		3013.23	111.624	0.930203		3013.23	122.32	351.019	3013.23	40.7996	700.34	3013.23	-34.7426	1099.75	3013.23	3.22955	1400.02
		3014.57	119.493	0.995775		3014.57	52.415	350.437	3014.57	51.2272	700.427	3014.57	77.2054	1100.55	3014.57	-35.4774	1399.75
		3015.91	74.2818	0.619015		3015.91	4.47108	350.037	3015.91	52.5038	700.438	3015.91	40.8751	1100.29	3015.91	-52.2534	1399.63
		3017.24	19.905	0.165875		3017.24	-1.3666	349.989	3017.24	202.116	701.684	3017.24	37.4841	1100.27	3017.24	-67.2518	1399.52
		3018.58	-34.4799	-0.287333		3018.58	-40.1745	349.665	3018.58	55.0165	700.458	3018.58	-2.55367	1099.98	3018.58	-43.8258	1399.69
		3019.92	43.0407	0.358673		3019.92	-22.201	349.815	3019.92	-57.3476	699.522	3019.92	140.598	1101	3019.92	25.3638	1400.18
		3021.26	10.6486	0.0887383		3021.26	-44.5337	349.629	3021.26	20.8203	700.174	3021.26	84.0461	1100.6	3021.26	19.4023	1400.14
		3022.59	47.9051	0.399209		3022.59	19.2742	350.161	3022.59	88.0077	700.733	3022.59	223.584	1101.6	3022.59	123.368	1400.88
		3023.93	35.6865	0.297387		3023.93	90.4407	350.754	3023.93	43.376	700.361	3023.93	18.5076	1100.13	3023.93	183.329	1401.31
		3025.27	107.819	0.898489		3025.27	36.9466	350.308	3025.27	156.404	701.303	3025.27	31.5416	1100.23	3025.27	-68.4549	1399.51
		3026.6	-5.25304	-0.0437753		3026.6	16.4349	350.137	3026.6	148.407	701.237	3026.6	-1.28977	1099.99	3026.6	50.0729	1400.36
		3027.94	17.3789	0.144824		3027.94	-29.769	349.752	3027.94	-112.751	699.06	3027.94	97.9246	1100.7	3027.94	16.3442	1400.12
		3029.27	-13.1871	-0.109893		3029.27	186.361	351.553	3029.27	35.1009	700.293	3029.27	28.3617	1100.2	3029.27	70.6065	1400.5
		3030.61	9.46066	0.0788388		3030.61	-135.098	348.874	3030.61	-88.592	699.262	3030.61	67.0307	1100.48	3030.61	-104.541	1399.25
		3031.94	-70.6692	-0.58891		3031.94	26.0197	350.217	3031.94	75.7975	700.632	3031.94	61.6408	1100.44	3031.94	76.2508	1400.54
		3033.28	-132.471	-1.10393		3033.28	-53.2954	349.556	3033.28	-3.93061	699.967	3033.28	30.5289	1100.22	3033.28	71.6403	1400.51
		3034.61	2.16417	0.0180347		3034.61	54.6276	350.455	3034.61	24.61	700.205	3034.61	91.1851	1100.65	3034.61	-85.44	1399.39
		3035.95	24.8305	0.206921		3035.95	-70.6468	349.411	3035.95	207.408	701.728	3035.95	-39.1435	1099.72	3035.95	-66.3314	1399.53
		3037.28	93.4194	0.778495		3037.28	-14.141	349.882	3037.28	107.367	700.895	3037.28	15.9709	1100.11	3037.28	26.186	1400.19
		3038.62	-23.526	-0.19605		3038.62	-21.93	349.817	3038.62	-42.3451	699.647	3038.62	-59.3579	1099.58	3038.62	12.1167	1400.09
		3039.95	37.717	0.314309		3039.95	-99.5714	349.17	3039.95	28.354	700.236	3039.95	-107.183	1099.23	3039.95	117.409	1400.84
		3041.28	7.08797	0.0590664		3041.28	94.7581	350.79	3041.28	-103.114	699.141	3041.28	-112.771	1099.19	3041.28	5.80591	1400.04
		3042.62	-19.8884	-0.165737		3042.62	-41.751	349.652	3042.62	-14.08	699.883	3042.62	-9.93655	1099.93	3042.62	123.866	1400.88
		3043.95	2.75442	0.0229535		3043.95	51.4893	350.429	3043.95	-11.4688	699.904	3043.95	-173.696	1098.76	3043.95	23.0958	1400.16
		3045.28	14.3686	0.119738		3045.28	50.9633	350.425	3045.28	-100.833	699.16	3045.28	111.173	1100.79	3045.28	-35.4838	1399.75
		3046.61	-36.5658	-0.304715		3046.61	-12.1301	349.899	3046.61	26.7663	700.223	3046.61	-69.2364	1099.51	3046.61	187.251	1401.34
		3047.95	-17.6227	-0.146856		3047.95	-89.9897	349.25	3047.95	-92.1425	699.232	3047.95	48.286	1100.34	3047.95	-99.6007	1399.29
		3049.28	-31.8055	-0.265046		3049.28	-33.5808	349.72	3049.28	75.9133	700.633	3049.28	68.3012	1100.49	3049.28	42.0903	1400.3
		3050.61	25.7633	0.214694		3050.61	61.465	350.512	3050.61	58.1044	700.484	3050.61	-23.9799	1099.83	3050.61	-5.81439	1399.96
		3051.94	-60.2408	-0.502007		3051.94	-45.9648	349.617	3051.94	165.42	701.378	3051.94	-226.775	1098.38	3051.94	6.92793	1400.05
		3053.27	0.996271	0.00830226		3053.27	8.55272	350.071	3053.27	11.2937	700.094	3053.27	107.928	1100.77	3053.27	12.2258	1400.09
		3054.6	-29.8343	-0.248619		3054.6	11.499	350.096	3054.6	15.4319	700.129	3054.6	-17.6453	1099.87	3054.6	-52.5348	1399.62
		3055.93	64.5449	0.537874		3055.93	-9.53686	349.921	3055.93	-15.4757	699.871	3055.93	-5.17069	1099.96	3055.93	142.286	1401.02
		3057.26	-23.4369	-0.195308		3057.26	78.0748	350.651	3057.26	-31.7042	699.736	3057.26	-9.3073	1099.93	3057.26	200.772	1401.43
		3058.59	32.2461	0.268717		3058.59	68.0294	350.567	3058.59	-75.6251	699.37	3058.59	67.5898	1100.48	3058.59	6.76189	1400.05
		3059.92	45.5417	0.379514		3059.92	76.3727	350.636	3059.92	158.668	701.322	3059.92	-126.43	1099.1	3059.92	-17.8674	1399.87
		3061.25	12.7326	0.106105		3061.25	38.5923	350.322	3061.25	37.2434	700.31	3061.25	72.0469	1100.51	3061.25	12.6937	1400.09
		3062.58	-33.0193	-0.275161		3062.58	30.2555	350.252	3062.58	-69.5303	699.421	3062.58	-223.532	1098.4	3062.58	-37.9464	1399.73
		3063.91	-89.8781	-0.748984		3063.91	97.4778	350.812	3063.91	6.15647	700.051	3063.91	113.22	1100.81	3063.91	134.421	1400.96
		3065.24	24.7383	0.206152		3065.24	-27.1289	349.774	3065.24	-3.02126	699.975	3065.24	51.6829	1100.37	3065.24	-60.2656	1399.57
		3066.57	2.85823	0.0238186		3066.57	113.803	350.948	3066.57	-3.0406	699.975	3066.57	-89.2496	1099.36	3066.57	-63.2837	1399.55
		3067.89	-7.98884	-0.0665737		3067.89	33.3372	350.278	3067.89	81.7563	700.681	3067.89	55.7033	1100.4	3067.89	171.612	1401.23
		3069.22	25.4195	0.211829		3069.22	115.189	350.96	3069.22	70.5674	700.588	3069.22	-113.053	1099.19	3069.22	42.951	1400.31
		3070.55	138.173	1.15144		3070.55	38.2823	350.319	3070.55	48.2342	700.402	3070.55	-86.2747	1099.38	3070.55	19.3407	1400.14
		3071.88	-7.52151	-0.0626793		3071.88	114.524	350.954	3071.88	92.2938	700.769	3071.88	-13.3794	1099.9	3071.88	-65.3024	1399.53
		3073.2	-24.0514	-0.200428		3073.2	39.332	350.328	3073.2	43.9847	700.367	3073.2	122.277	1100.87	3073.2	41.9519	1400.3
		3074.53	88.6566	0.738805		3074.53	58.2473	350.485	3074.53	-24.7201	699.794	3074.53	30.7748	1100.22	3074.53	114.052	1400.81
		3075.86	-5.52009	-0.0460007		3075.86	123.29	351.027	3075.86	8.07522	700.067	3075.86	68.4864	1100.49	3075.86	106.638	1400.76
		3077.18	90.5288	0.754407		3077.18	105.162	350.876	3077.18	160.911	701.341	3077.18	117.247	1100.84	3077.18	117.59	1400.84
		3078.51	62.7657	0.523047		3078.51	3.81266	350.032	3078.51	16.2254	700.135	3078.51	27.3814	1100.2	3078.51	50.8245	1400.36
		3079.84	88.5524	0.737937		3079.84	129.705	351.081	3079.84	21.1278	700.176	3079.84	-7.12257	1099.95	3079.84	59.7028	1400.43
		3081.16	108.758	0.906313		3081.16	37.4399	350.312	3081.16	61.0828	700.509	3081.16	76.6131	1100.55	3081.16	127.626	1400.91
		3082.49	130.778	1.08981		3082.49	83.7533	350.698	3082.49	141.663	701.181	3082.49	245.381	1101.75	3082.49	176.972	1401.26
		3083.81	173.106	1.44255		3083.81	94.8839	350.791	3083.81	92.7501	700.773	3083.81	186.689	1101.33	3083.81	57.9351	1400.41
		3085.14	47.0833	0.392361		3085.14	131.851	351.099	3085.14	78.8926	700.657	3085.14	213.005	1101.52	3085.14	164.403	1401.17
		3086.46	144.82	1.20683		3086.46	207.612	351.73	3086.46	148.205	701.235	3086.46	72.7625	1100.52	3086.46	126.487	1400.9
		3087.79	131.522	1.09602		3087.79	181.564	351.513	3087.79	202.669	701.689	3087.79	85.9933	1100.61	3087.79	227.223	1401.62
		3089.11	103.366	0.861379		3089.11	218.363	351.82	3089.11	86.808	700.723	3089.11	25.1399	1100.18	3089.11	196.477	1401.4
		3090.43	39.9778	0.333148		3090.43	184.763	351.54	3090.43	167.049	701.392	3090.43	75.2718	1100.54	3090.43	115.621	1400.83
		3091.76	91.3041	0.760868		3091.76	-2.60099	349.978	3091.76	115.784	700.965	3091.76	90.1785	1100.64	3091.76	180.881	1401.29
		3093.08	88.8955	0.740796		3093.08	95.0772	350.792	3093.08	142.201	701.185	3093.08	45.7708	1100.33	3093.08	31.2324	1400.22
		3094.4	54.9466	0.457889		3094.4	96.4045	350.803	3094.4	111.133	700.926	3094.4	-57.9872	1099.59	3094.4	107.379	1400.77
		3095.73	-12.4195	-0.103496		3095.73	171.755	351.431	3095.73	-33.0384	699.725	3095.73	-6.23691	1099.96	3095.73	96.3593	1400.69
		3097.05	60.9574	0.507978		3097.05	191.471	351.596	3097.05	-36.5207	699.696	3097.05	171.469	1101.22	3097.05	218.628	1401.56
		3098.37	11.9904	0.0999201		3098.37	53.5871	350.447	3098.37	-32.6705	699.728	3098.37	123.078	1100.88	3098.37	7.23206	1400.05
		3099.69	-5.53969	-0.0461641		3099.69	97.2289	350.81	3099.69	17.4426	700.145	3099.69	-27.3476	1099.8	3099.69	-28.2699	1399.8
		3101.01	89.9566	0.749638		3101.01	92.5987	350.772	3101.01	21.1385	700.176	3101.01	51.9948	1100.37	3101.01	117.783	1400.84
		3102.34	100.135	0.83446		3102.34	34.1136	350.284	3102.34	-8.61912	699.928	3102.34	36.734	1100.26	3102.34	15.2912	1400.11
		3103.66	-34.4191	-0.286826		3103.66	90.5072	350.754	3103.66	109.897	700.916	3103.66	110.416	1100.79	3103.66	57.2992	1400.41
		3104.98	55.3843	0.461536		3104.98	-57.216	349.523	3104.98	-118.52	699.012	3104.98	161.802	1101.16	3104.98	125.178	1400.89
		3106.3	57.9554	0.482962		3106.3	86.2247	350.719	3106.3	-55.8036	699.535	3106.3	38.7275	1100.28	3106.3	59.3694	1400.42
		3107.62	-0.780409	-0.00650341		3107.62	-11.6251	349.903	3107.62	-54.3937	699.547	3107.62	-12.0932	1099.91	3107.62	62.0754	1400.44
		3108.94	36.9184	0.307654		3108.94	53.7429	350.448	3108.94	-64.2053	699.465	3108.94	-144.675	1098.97	3108.94	60.95	1400.44
		3110.26	-86.9536	-0.724613		3110.26	-31.3351	349.739	3110.26	70.6975	700.589	3110.26	66.0731	1100.47	3110.26	-10.8486	1399.92
		3111.58	-64.2446	-0.535372		3111.58	-40.4032	349.663	3111.58	-139.813	698.835	3111.58	68.8595	1100.49	3111.58	91.7521	1400.66
		3112.9	-63.8758	-0.532298		3112.9	4.30002	350.036	3112.9	7.96175	700.066	3112.9	-112.287	1099.2	3112.9	-21.1653	1399.85
		3114.22	23.7259	0.197716		3114.22	152.946	351.275	3114.22	5.23049	700.044	3114.22	100.225	1100.72	3114.22	25.5022	1400.18
		3115.54	7.25225	0.0604354		3115.54	67.4579	350.562	3115.54	80.4514	700.67	3115.54	-32.8304	1099.77	3115.54	103.655	1400.74
		3116.85	-26.0252	-0.216876		3116.85	15.2889	350.127	3116.85	44.1091	700.368	3116.85	-166.016	1098.81	3116.85	-30.1304	1399.78
		3118.17	37.2668	0.310557		3118.17	154.45	351.287	3118.17	-31.3671	699.739	3118.17	-76.2872	1099.46	3118.17	42.2271	1400.3
		3119.49	-27.7603	-0.231336		3119.49	-54.0719	349.549	3119.49	-66.0612	699.449	3119.49	39.4273	1100.28	3119.49	1.093	1400.01
		3120.81	-7.35142	-0.0612618		3120.81	-34.064	349.716	3120.81	-0.449972	699.996	3120.81	-15.9539	1099.89	3120.81	-69.9238	1399.5
		3122.13	37.1669	0.309724		3122.13	88.1365	350.734	3122.13	57.6542	700.48	3122.13	-41.6823	1099.7	3122.13	165.774	1401.18
		3123.44	90.9308	0.757756		3123.44	143.323	351.194	3123.44	20.8259	700.174	3123.44	40.3895	1100.29	3123.44	96.3871	1400.69
		3124.76	49.7578	0.414648		3124.76	163.081	351.359	3124.76	97.3842	700.812	3124.76	-54.3306	1099.61	3124.76	-88.4897	1399.37
		3126.08	-2.67337	-0.0222781		3126.08	-21.9478	349.817	3126.08	39.8976	700.332	3126.08	-115.675	1099.17	3126.08	37.2068	1400.27
		3127.39	86.2516	0.718764		3127.39	-39.6412	349.67	3127.39	64.1926	700.535	3127.39	122.531	1100.88	3127.39	34.4173	1400.25
		3128.71	-9.15809	-0.0763174		3128.71	-57.4434	349.521	3128.71	103.301	700.861	3128.71	20.0848	1100.14	3128.71	251.18	1401.79
		3130.03	70.3394	0.586162		3130.03	114.561	350.955	3130.03	71.5822	700.597	3130.03	47.853	1100.34	3130.03	-90.6575	1399.35
		3131.34	-58.7868	-0.48989		3131.34	44.4302	350.37	3131.34	-90.6015	699.245	3131.34	-26.8778	1099.81	3131.34	191.125	1401.37
		3132.66	70.866	0.59055		3132.66	13.2837	350.111	3132.66	-29.4206	699.755	3132.66	-6.72376	1099.95	3132.66	59.4057	1400.42
		3133.97	42.1368	0.35114		3133.97	-29.1571	349.757	3133.97	48.4624	700.404	3133.97	-51.848	1099.63	3133.97	67.2565	1400.48
		3135.29	-14.6318	-0.121932		3135.29	60.5793	350.505	3135.29	144.921	701.208	3135.29	-11.3564	1099.92	3135.29	6.06313	1400.04
		3136.6	109.276	0.910634		3136.6	77.5568	350.646	3136.6	159.32	701.328	3136.6	-13.8015	1099.9	3136.6	97.5675	1400.7
		3137.92	72.8453	0.607044		3137.92	62.7492	350.523	3137.92	59.9332	700.499	3137.92	-59.1992	1099.58	3137.92	-79.4154	1399.43
		3139.23	136.994	1.14162		3139.23	-95.7387	349.202	3139.23	-41.4524	699.655	3139.23	-24.5343	1099.82	3139.23	-73.8524	1399.47
		3140.55	10.8821	0.0906839		3140.55	-52.9936	349.558	3140.55	30.4658	700.254	3140.55	233.84	1101.67	3140.55	241.175	1401.72
		3141.86	115.917	0.965972		3141.86	95.9712	350.8	3141.86	16.5243	700.138	3141.86	-91.566	1099.35	3141.86	61.9659	1400.44
		3143.17	30.6288	0.25524		3143.17	45.276	350.377	3143.17	-38.5501	699.679	3143.17	-75.7922	1099.46	3143.17	-35.3201	1399.75
		3144.49	126.216	1.0518		3144.49	76.5519	350.638	3144.49	-60.1457	699.499	3144.49	-48.9011	1099.65	3144.49	-102.876	1399.27
		3145.8	91.1233	0.759361		3145.8	14.4196	350.12	3145.8	-31.4458	699.738	3145.8	97.3555	1100.7	3145.8	51.5387	1400.37
		3147.11	48.4656	0.40388		3147.11	97.746	350.815	3147.11	53.1748	700.443	3147.11	112.918	1100.81	3147.11	97.6672	1400.7
		3148.43	18.7784	0.156487		3148.43	119.387	350.995	3148.43	1.45745	700.012	3148.43	18.2531	1100.13	3148.43	-84.0324	1399.4
		3149.74	108.505	0.904211		3149.74	0.878442	350.007	3149.74	89.6856	700.747	3149.74	59.7802	1100.43	3149.74	60.9018	1400.44
		3151.05	-83.8342	-0.698619		3151.05	26.0258	350.217	3151.05	-94.8141	699.21	3151.05	73.2237	1100.52	3151.05	202.084	1401.44
		3152.36	16.9486	0.141238		3152.36	36.1275	350.301	3152.36	262.261	702.186	3152.36	6.25812	1100.04	3152.36	109.746	1400.78
		3153.67	-20.5738	-0.171448		3153.67	38.6501	350.322	3153.67	36.4549	700.304	3153.67	62.4958	1100.45	3153.67	49.0701	1400.35
		3154.99	33.376	0.278133		3154.99	54.1455	350.451	3154.99	-97.9486	699.184	3154.99	10.2822	1100.07	3154.99	70.5331	1400.5
		3156.3	-75.3516	-0.62793		3156.3	-18.3126	349.847	3156.3	105.826	700.882	3156.3	-42.0397	1099.7	3156.3	-139.825	1399
		3157.61	8.35252	0.0696043		3157.61	26.8689	350.224	3157.61	-2.60009	699.978	3157.61	56.9605	1100.41	3157.61	55.358	1400.4
		3158.92	24.692	0.205767		3158.92	143.014	351.192	3158.92	-15.7813	699.868	3158.92	10.0665	1100.07	3158.92	11.2267	1400.08
		3160.23	-80.6077	-0.671731		3160.23	137.532	351.146	3160.23	21.4545	700.179	3160.23	101.464	1100.72	3160.23	167.142	1401.19
		3161.54	131.963	1.09969		3161.54	4.73869	350.039	3161.54	43.6643	700.364	3161.54	20.7166	1100.15	3161.54	36.8805	1400.26
		3162.85	33.9619	0.283016		3162.85	2.75313	350.023	3162.85	123.814	701.032	3162.85	-45.1761	1099.68	3162.85	16.9154	1400.12
		3164.16	74.3141	0.619284		3164.16	107.321	350.894	3164.16	22.4072	700.187	3164.16	60.9755	1100.44	3164.16	137.255	1400.98
		3165.47	150.16	1.25133		3165.47	-87.6435	349.27	3165.47	65.0079	700.542	3165.47	58.5253	1100.42	3165.47	21.7854	1400.16
		3166.78	-8.04543	-0.0670453		3166.78	-13.2191	349.89	3166.78	77.6099	700.647	3166.78	9.1922	1100.07	3166.78	-86.2639	1399.38
		3168.08	30.2037	0.251697		3168.08	-49.3431	349.589	3168.08	-61.5114	699.487	3168.08	30.9026	1100.22	3168.08	-35.2226	1399.75
		3169.39	49.6597	0.413831		3169.39	-59.3683	349.505	3169.39	-0.367376	699.997	3169.39	174.264	1101.24	3169.39	-60.9568	1399.56
		3170.7	40.945	0.341208		3170.7	59.7393	350.498	3170.7	40.1334	700.334	3170.7	40.3784	1100.29	3170.7	136.189	1400.97
		3172.01	-54.03	-0.45025		3172.01	85.1178	350.709	3172.01	28.138	700.234	3172.01	-13.0823	1099.91	3172.01	114.215	1400.82
		3173.32	53.2493	0.443744		3173.32	-2.02659	349.983	3173.32	14.2052	700.118	3173.32	-57.2805	1099.59	3173.32	71.6236	1400.51
		3174.62	68.6568	0.57214		3174.62	99.9845	350.833	3174.62	63.9346	700.533	3174.62	-19.1148	1099.86	3174.62	21.5292	1400.15
		3175.93	53.9997	0.449998		3175.93	5.10756	350.043	3175.93	164.244	701.369	3175.93	37.7276	1100.27	3175.93	-156.038	1398.89
		3177.24	24.2593	0.202161		3177.24	97.5818	350.813	3177.24	33.9294	700.283	3177.24	88.8831	1100.63	3177.24	142.572	1401.02
		3178.54	28.1856	0.23488		3178.54	-33.1624	349.724	3178.54	104.169	700.868	3178.54	119.349	1100.85	3178.54	2.51455	1400.02
		3179.85	88.3058	0.735882		3179.85	6.62552	350.055	3179.85	181.894	701.516	3179.85	-86.5825	1099.38	3179.85	12.4876	1400.09
		3181.16	-11.0844	-0.0923703		3181.16	6.93624	350.058	3181.16	45.744	700.381	3181.16	44.9994	1100.32	3181.16	52.5216	1400.38
		3182.46	35.7684	0.29807		3182.46	-142.955	348.809	3182.46	-32.3281	699.731	3182.46	7.68372	1100.05	3182.46	4.4325	1400.03
		3183.77	43.1543	0.359619		3183.77	-5.86375	349.951	3183.77	-63.5519	699.47	3183.77	-119.809	1099.14	3183.77	89.6256	1400.64
		3185.08	31.7007	0.264173		3185.08	-37.7478	349.685	3185.08	-107.959	699.1	3185.08	116.719	1100.83	3185.08	32.2584	1400.23
		3186.38	5.15165	0.0429304		3186.38	159.31	351.328	3186.38	37.2024	700.31	3186.38	-25.9813	1099.81	3186.38	46.2816	1400.33
		3187.68	32.9782	0.274818		3187.68	-9.81417	349.918	3187.68	-123.685	698.969	3187.68	-52.3915	1099.63	3187.68	45.3663	1400.32
		3188.99	-119.554	-0.996286		3188.99	12.4803	350.104	3188.99	-63.0343	699.475	3188.99	28.1672	1100.2	3188.99	95.2489	1400.68
		3190.29	-1.70917	-0.0142431		3190.29	42.211	350.352	3190.29	112.203	700.935	3190.29	-15.3041	1099.89	3190.29	216.627	1401.55
		3191.6	-28.5568	-0.237973		3191.6	19.2606	350.161	3191.6	-56.3389	699.531	3191.6	-141.536	1098.99	3191.6	-26.3444	1399.81
		3192.9	-16.0163	-0.133469		3192.9	-24.4524	349.796	3192.9	51.2853	700.427	3192.9	-72.4532	1099.48	3192.9	146.011	1401.04
		3194.21	19.0212	0.15851		3194.21	40.7534	350.34	3194.21	-10.2223	699.915	3194.21	90.5623	1100.65	3194.21	32.8568	1400.23
		3195.51	22.0514	0.183762		3195.51	-3.13025	349.974	3195.51	-39.8002	699.668	3195.51	16.6937	1100.12	3195.51	28.8262	1400.21
		3196.81	-102.839	-0.856992		3196.81	35.6269	350.297	3196.81	-3.58252	699.97	3196.81	6.65425	1100.05	3196.81	-25.8362	1399.82
		3198.12	-17.1998	-0.143332		3198.12	17.905	350.149	3198.12	42.0564	700.35	3198.12	-86.2085	1099.38	3198.12	55.0394	1400.39
		3199.42	27.0328	0.225274		3199.42	62.1792	350.518	3199.42	-2.57294	699.979	3199.42	80.405	1100.57	3199.42	115.412	1400.82
		3200.72	-2.14741	-0.0178951		3200.72	16.095	350.134	3200.72	44.9766	700.375	3200.72	102.145	1100.73	3200.72	31.1069	1400.22
		3202.02	-20.6317	-0.171931		3202.02	-31.2255	349.74	3202.02	91.3395	700.761	3202.02	24.7353	1100.18	3202.02	-126.084	1399.1

## Sheet: FT-IR
	starting material			S10 H2O RT pt 1 8 scan 2 res					S4 KOH RT pt 1 8 scan 2 res				S7 H2O 4°C pt 1 8 scan 2 res					S1 KOH 4°C pt 3 8 scan 2 res
3848.87	0.000459		3848.87	0.000326	0.300326			3848.87	-0.003579	0.596421		3848.87	-0.006525	0.893475			3848.87	-0.006702	1.1933
3847.9	0.000134		3847.9	8e-05	0.30008			3847.9	-0.003655	0.596345		3847.9	-0.006931	0.893069			3847.9	-0.007038	1.19296
3846.94	0		3846.94	0	0.3			3846.94	-0.00367	0.59633		3846.94	-0.007103	0.892897			3846.94	-0.007202	1.1928
3845.97	0.00012		3845.97	0.000139	0.300139			3845.97	-0.003605	0.596395		3845.97	-0.006992	0.893008			3845.97	-0.007123	1.19288
3845.01	0.000451		3845.01	0.000448	0.300448			3845.01	-0.003456	0.596544		3845.01	-0.006642	0.893358			3845.01	-0.006833	1.19317
3844.05	0.000731		3844.05	0.000692	0.300692			3844.05	-0.003336	0.596664		3844.05	-0.00623	0.89377			3844.05	-0.006511	1.19349
3843.08	0.000691		3843.08	0.000605	0.300605			3843.08	-0.003396	0.596604		3843.08	-0.006157	0.893843			3843.08	-0.006463	1.19354
3842.12	0.000694		3842.12	0.000565	0.300565			3842.12	-0.00344	0.59656		3842.12	-0.006245	0.893755			3842.12	-0.0065	1.1935
3841.15	0.000958		3841.15	0.000825	0.300825			3841.15	-0.003327	0.596673		3841.15	-0.00602	0.89398			3841.15	-0.006292	1.19371
3840.19	0.001244		3840.19	0.001087	0.301087			3840.19	-0.003207	0.596793		3840.19	-0.005634	0.894366			3840.19	-0.005992	1.19401
3839.23	0.001406		3839.23	0.001194	0.301194			3839.23	-0.003154	0.596846		3839.23	-0.005496	0.894504			3839.23	-0.00587	1.19413
3838.26	0.001297		3838.26	0.001094	0.301094			3838.26	-0.003193	0.596807		3838.26	-0.005641	0.894359			3838.26	-0.005968	1.19403
3837.3	0.000987		3837.3	0.000796	0.300796			3837.3	-0.003338	0.596662		3837.3	-0.005886	0.894114			3837.3	-0.006214	1.19379
3836.33	0.000945		3836.33	0.000736	0.300736			3836.33	-0.00338	0.59662		3836.33	-0.005977	0.894023			3836.33	-0.006334	1.19367
3835.37	0.001003		3835.37	0.000814	0.300814			3835.37	-0.003352	0.596648		3835.37	-0.005976	0.894024			3835.37	-0.006314	1.19369
3834.4	0.000812		3834.4	0.000616	0.300616			3834.4	-0.003439	0.596561		3834.4	-0.006171	0.893829			3834.4	-0.006462	1.19354
3833.44	0.000684		3833.44	0.000459	0.300459			3833.44	-0.003489	0.596511		3833.44	-0.006406	0.893594			3833.44	-0.006664	1.19334
3832.48	0.000796		3832.48	0.000624	0.300624			3832.48	-0.00339	0.59661		3832.48	-0.006349	0.893651			3832.48	-0.006601	1.1934
3831.51	0.000749		3831.51	0.000671	0.300671			3831.51	-0.003382	0.596618		3831.51	-0.006266	0.893734			3831.51	-0.006522	1.19348
3830.55	0.000418		3830.55	0.000383	0.300383			3830.55	-0.003557	0.596443		3830.55	-0.006557	0.893443			3830.55	-0.006773	1.19323
3829.58	0.000279		3829.58	0.000249	0.300249			3829.58	-0.003643	0.596357		3829.58	-0.006852	0.893148			3829.58	-0.006993	1.19301
3828.62	0.000504		3828.62	0.000466	0.300466			3828.62	-0.003547	0.596453		3828.62	-0.006743	0.893257			3828.62	-0.006851	1.19315
3827.66	0.000849		3827.66	0.000793	0.300793			3827.66	-0.003384	0.596616		3827.66	-0.006348	0.893652			3827.66	-0.006498	1.1935
3826.69	0.000953		3826.69	0.000868	0.300868			3826.69	-0.003312	0.596688		3826.69	-0.00607	0.89393			3826.69	-0.006291	1.19371
3825.73	0.00081		3825.73	0.000668	0.300668			3825.73	-0.003373	0.596627		3825.73	-0.006136	0.893864			3825.73	-0.006376	1.19362
3824.76	0.000774		3824.76	0.000596	0.300596			3824.76	-0.003414	0.596586		3824.76	-0.00627	0.89373			3824.76	-0.006488	1.19351
3823.8	0.000971		3823.8	0.000807	0.300807			3823.8	-0.003324	0.596676		3823.8	-0.006182	0.893818			3823.8	-0.00641	1.19359
3822.83	0.001243		3822.83	0.001126	0.301126			3822.83	-0.003138	0.596862		3822.83	-0.005919	0.894081			3822.83	-0.006161	1.19384
3821.87	0.001299		3821.87	0.001248	0.301248			3821.87	-0.003012	0.596988		3821.87	-0.005688	0.894312			3821.87	-0.005887	1.19411
3820.91	0.001124		3820.91	0.001071	0.301071			3820.91	-0.003074	0.596926		3820.91	-0.005588	0.894412			3820.91	-0.005769	1.19423
3819.94	0.001134		3819.94	0.000946	0.300946			3819.94	-0.003192	0.596808		3819.94	-0.0056	0.8944			3819.94	-0.005886	1.19411
3818.98	0.001308		3818.98	0.000995	0.300995			3818.98	-0.003215	0.596785		3818.98	-0.005727	0.894273			3818.98	-0.00609	1.19391
3818.01	0.001444		3818.01	0.001106	0.301106			3818.01	-0.003163	0.596837		3818.01	-0.00587	0.89413			3818.01	-0.006202	1.1938
3817.05	0.001512		3817.05	0.00124	0.30124			3817.05	-0.003069	0.596931		3817.05	-0.005917	0.894083			3817.05	-0.006173	1.19383
3816.09	0.001315		3816.09	0.001137	0.301137			3816.09	-0.003087	0.596913		3816.09	-0.005991	0.894009			3816.09	-0.006197	1.1938
3815.12	0.000902		3815.12	0.000736	0.300736			3815.12	-0.003308	0.596692		3815.12	-0.00627	0.89373			3815.12	-0.006469	1.19353
3814.16	0.000607		3814.16	0.000448	0.300448			3814.16	-0.003499	0.596501		3814.16	-0.0066	0.8934			3814.16	-0.006757	1.19324
3813.19	0.000383		3813.19	0.000298	0.300298			3813.19	-0.003573	0.596427		3813.19	-0.006829	0.893171			3813.19	-0.006896	1.1931
3812.23	0.000236		3812.23	0.000211	0.300211			3812.23	-0.00358	0.59642		3812.23	-0.006924	0.893076			3812.23	-0.006935	1.19307
3811.26	0.000238		3811.26	0.000234	0.300234			3811.26	-0.00354	0.59646		3811.26	-0.006922	0.893078			3811.26	-0.00693	1.19307
3810.3	0.000309		3810.3	0.000334	0.300334			3810.3	-0.003492	0.596508		3810.3	-0.006904	0.893096			3810.3	-0.006894	1.19311
3809.34	0.000465		3809.34	0.00052	0.30052			3809.34	-0.00342	0.59658		3809.34	-0.00681	0.89319			3809.34	-0.006786	1.19321
3808.37	0.00084		3808.37	0.000898	0.300898			3808.37	-0.003235	0.596765		3808.37	-0.006486	0.893514			3808.37	-0.006523	1.19348
3807.41	0.001229		3807.41	0.001278	0.301278			3807.41	-0.003008	0.596992		3807.41	-0.006019	0.893981			3807.41	-0.006165	1.19383
3806.44	0.001188		3806.44	0.001188	0.301188			3806.44	-0.003026	0.596974		3806.44	-0.005859	0.894141			3806.44	-0.006065	1.19393
3805.48	0.000934		3805.48	0.000846	0.300846			3805.48	-0.003238	0.596762		3805.48	-0.006109	0.893891			3805.48	-0.006297	1.1937
3804.52	0.000958		3804.52	0.000821	0.300821			3804.52	-0.003289	0.596711		3804.52	-0.006244	0.893756			3804.52	-0.00641	1.19359
3803.55	0.001326		3803.55	0.001161	0.301161			3803.55	-0.003095	0.596905		3803.55	-0.005994	0.894006			3803.55	-0.006201	1.1938
3802.59	0.001794		3802.59	0.001595	0.301595			3802.59	-0.002794	0.597206		3802.59	-0.00556	0.89444			3802.59	-0.005824	1.19418
3801.62	0.001867		3801.62	0.001637	0.301637			3801.62	-0.002689	0.597311		3801.62	-0.005429	0.894571			3801.62	-0.005665	1.19433
3800.66	0.001557		3800.66	0.001262	0.301262			3800.66	-0.002908	0.597092		3800.66	-0.005641	0.894359			3800.66	-0.00585	1.19415
3799.7	0.001328		3799.7	0.000974	0.300974			3799.7	-0.003135	0.596865		3799.7	-0.005836	0.894164			3799.7	-0.006064	1.19394
3798.73	0.001307		3798.73	0.000966	0.300966			3798.73	-0.003153	0.596847		3798.73	-0.005878	0.894122			3798.73	-0.00609	1.19391
3797.77	0.001485		3797.77	0.001193	0.301193			3797.77	-0.003013	0.596987		3797.77	-0.00573	0.89427			3797.77	-0.005918	1.19408
3796.8	0.00157		3796.8	0.001316	0.301316			3796.8	-0.002942	0.597058		3796.8	-0.005621	0.894379			3796.8	-0.00579	1.19421
3795.84	0.001138		3795.84	0.000923	0.300923			3795.84	-0.003176	0.596824		3795.84	-0.005953	0.894047			3795.84	-0.006088	1.19391
3794.87	0.000533		3794.87	0.000401	0.300401			3794.87	-0.003491	0.596509		3794.87	-0.006497	0.893503			3794.87	-0.006573	1.19343
3793.91	0.000246		3793.91	0.000206	0.300206			3793.91	-0.003619	0.596381		3793.91	-0.006803	0.893197			3793.91	-0.006801	1.1932
3792.95	0.00019		3792.95	0.000194	0.300194			3792.95	-0.003635	0.596365		3792.95	-0.006902	0.893098			3792.95	-0.006834	1.19317
3791.98	0.00013		3791.98	0.000148	0.300148			3791.98	-0.00365	0.59635		3791.98	-0.006987	0.893013			3791.98	-0.006877	1.19312
3791.02	4.4e-05		3791.02	6.7e-05	0.300067			3791.02	-0.00366	0.59634		3791.02	-0.007063	0.892937			3791.02	-0.006916	1.19308
3790.05	3.7e-05		3790.05	4.5e-05	0.300045			3790.05	-0.003633	0.596367		3790.05	-0.007029	0.892971			3790.05	-0.006862	1.19314
3789.09	6.3e-05		3789.09	4.6e-05	0.300046			3789.09	-0.00362	0.59638		3789.09	-0.006952	0.893048			3789.09	-0.006799	1.1932
3788.13	6.6e-05		3788.13	5.6e-05	0.300056			3788.13	-0.003652	0.596348		3788.13	-0.006914	0.893086			3788.13	-0.00679	1.19321
3787.16	0.000205		3787.16	0.000209	0.300209			3787.16	-0.003628	0.596372		3787.16	-0.006815	0.893185			3787.16	-0.006719	1.19328
3786.2	0.000629		3786.2	0.000589	0.300589			3786.2	-0.003444	0.596556		3786.2	-0.00651	0.89349			3786.2	-0.006485	1.19351
3785.23	0.001117		3785.23	0.000987	0.300987			3785.23	-0.003199	0.596801		3785.23	-0.006095	0.893905			3785.23	-0.006195	1.19381
3784.27	0.001075		3784.27	0.000895	0.300895			3784.27	-0.003203	0.596797		3784.27	-0.00609	0.89391			3784.27	-0.006229	1.19377
3783.3	0.000572		3783.3	0.000432	0.300432			3783.3	-0.003435	0.596565		3783.3	-0.00655	0.89345			3783.3	-0.006608	1.19339
3782.34	0.000298		3782.34	0.000226	0.300226			3782.34	-0.003559	0.596441		3782.34	-0.006836	0.893164			3782.34	-0.006836	1.19316
3781.38	0.000446		3781.38	0.000395	0.300395			3781.38	-0.003488	0.596512		3781.38	-0.00675	0.89325			3781.38	-0.006733	1.19327
3780.41	0.000864		3780.41	0.000787	0.300787			3780.41	-0.00329	0.59671		3780.41	-0.006441	0.893559			3780.41	-0.006426	1.19357
3779.45	0.001166		3779.45	0.001035	0.301035			3779.45	-0.003175	0.596825		3779.45	-0.006164	0.893836			3779.45	-0.006201	1.1938
3778.48	0.000954		3778.48	0.000786	0.300786			3778.48	-0.003323	0.596677		3778.48	-0.006291	0.893709			3778.48	-0.006373	1.19363
3777.52	0.000519		3777.52	0.000382	0.300382			3777.52	-0.003523	0.596477		3777.52	-0.006712	0.893288			3777.52	-0.006748	1.19325
3776.56	0.000178		3776.56	0.000115	0.300115			3776.56	-0.003647	0.596353		3776.56	-0.007077	0.892923			3776.56	-0.007023	1.19298
3775.59	5e-06		3775.59	0	0.3			3775.59	-0.003718	0.596282		3775.59	-0.007264	0.892736			3775.59	-0.007145	1.19285
3774.63	0		3774.63	1.3e-05	0.300013			3774.63	-0.003729	0.596271		3774.63	-0.007285	0.892715			3774.63	-0.007134	1.19287
3773.66	6.4e-05		3773.66	9e-05	0.30009			3773.66	-0.003698	0.596302		3773.66	-0.007205	0.892795			3773.66	-0.007036	1.19296
3772.7	0.000245		3772.7	0.000254	0.300254			3772.7	-0.00361	0.59639		3772.7	-0.007037	0.892963			3772.7	-0.006866	1.19313
3771.73	0.000701		3771.73	0.000632	0.300632			3771.73	-0.0034	0.5966		3771.73	-0.006701	0.893299			3771.73	-0.006587	1.19341
3770.77	0.00132		3770.77	0.001135	0.301135			3770.77	-0.003113	0.596887		3770.77	-0.006232	0.893768			3770.77	-0.006237	1.19376
3769.81	0.001598		3769.81	0.001312	0.301312			3769.81	-0.002998	0.597002		3769.81	-0.005962	0.894038			3769.81	-0.006076	1.19392
3768.84	0.001259		3768.84	0.000961	0.300961			3768.84	-0.0032	0.5968		3768.84	-0.006185	0.893815			3768.84	-0.006303	1.1937
3767.88	0.000917		3767.88	0.000681	0.300681			3767.88	-0.003377	0.596623		3767.88	-0.00648	0.89352			3767.88	-0.006521	1.19348
3766.91	0.001006		3766.91	0.000813	0.300813			3766.91	-0.003306	0.596694		3766.91	-0.00641	0.89359			3766.91	-0.006403	1.1936
3765.95	0.001288		3765.95	0.001084	0.301084			3765.95	-0.003142	0.596858		3765.95	-0.00608	0.89392			3765.95	-0.006128	1.19387
3764.99	0.001224		3764.99	0.000983	0.300983			3764.99	-0.00316	0.59684		3764.99	-0.006025	0.893975			3764.99	-0.006158	1.19384
3764.02	0.000887		3764.02	0.000663	0.300663			3764.02	-0.003314	0.596686		3764.02	-0.006333	0.893667			3764.02	-0.006446	1.19355
3763.06	0.000676		3763.06	0.000515	0.300515			3763.06	-0.003421	0.596579		3763.06	-0.006577	0.893423			3763.06	-0.006615	1.19338
3762.09	0.000667		3762.09	0.000532	0.300532			3762.09	-0.003441	0.596559		3762.09	-0.006608	0.893392			3762.09	-0.006618	1.19338
3761.13	0.000938		3761.13	0.000788	0.300788			3761.13	-0.003298	0.596702		3761.13	-0.006386	0.893614			3761.13	-0.006446	1.19355
3760.17	0.00142		3760.17	0.001247	0.301247			3760.17	-0.003022	0.596978		3760.17	-0.005926	0.894074			3760.17	-0.006091	1.19391
3759.2	0.001609		3759.2	0.001393	0.301393			3759.2	-0.002945	0.597055		3759.2	-0.005626	0.894374			3759.2	-0.005881	1.19412
3758.24	0.001441		3758.24	0.00119	0.30119			3758.24	-0.003089	0.596911		3758.24	-0.005776	0.894224			3758.24	-0.005998	1.194
3757.27	0.001437		3757.27	0.001193	0.301193			3757.27	-0.003084	0.596916		3757.27	-0.005933	0.894067			3757.27	-0.006057	1.19394
3756.31	0.001464		3756.31	0.001224	0.301224			3756.31	-0.003024	0.596976		3756.31	-0.005962	0.894038			3756.31	-0.006039	1.19396
3755.34	0.001399		3755.34	0.001135	0.301135			3755.34	-0.003054	0.596946		3755.34	-0.005986	0.894014			3755.34	-0.006089	1.19391
3754.38	0.001593		3754.38	0.001298	0.301298			3754.38	-0.002979	0.597021		3754.38	-0.00584	0.89416			3754.38	-0.006005	1.19399
3753.42	0.00194		3753.42	0.001621	0.301621			3753.42	-0.002785	0.597215		3753.42	-0.005548	0.894452			3753.42	-0.005736	1.19426
3752.45	0.00199		3752.45	0.001644	0.301644			3752.45	-0.0027	0.5973		3752.45	-0.005384	0.894616			3752.45	-0.005527	1.19447
3751.49	0.00195		3751.49	0.001538	0.301538			3751.49	-0.002739	0.597261		3751.49	-0.005232	0.894768			3751.49	-0.005425	1.19457
3750.52	0.002094		3750.52	0.001634	0.301634			3750.52	-0.00273	0.59727		3750.52	-0.005051	0.894949			3750.52	-0.005355	1.19464
3749.56	0.001964		3749.56	0.001547	0.301547			3749.56	-0.00278	0.59722		3749.56	-0.00517	0.89483			3749.56	-0.005439	1.19456
3748.6	0.001756		3748.6	0.001387	0.301387			3748.6	-0.002903	0.597097		3748.6	-0.005342	0.894658			3748.6	-0.005565	1.19443
3747.63	0.00192		3747.63	0.001526	0.301526			3747.63	-0.002927	0.597073		3747.63	-0.00528	0.89472			3747.63	-0.005562	1.19444
3746.67	0.002146		3746.67	0.00171	0.30171			3746.67	-0.002865	0.597135		3746.67	-0.005151	0.894849			3746.67	-0.005461	1.19454
3745.7	0.002008		3745.7	0.001621	0.301621			3745.7	-0.002831	0.597169		3745.7	-0.005191	0.894809			3745.7	-0.005383	1.19462
3744.74	0.001341		3744.74	0.001095	0.301095			3744.74	-0.002982	0.597018		3744.74	-0.005574	0.894426			3744.74	-0.005546	1.19445
3743.77	0.000866		3743.77	0.000615	0.300615			3743.77	-0.00326	0.59674		3743.77	-0.005925	0.894075			3743.77	-0.005895	1.1941
3742.81	0.001188		3742.81	0.000806	0.300806			3742.81	-0.003282	0.596718		3742.81	-0.005824	0.894176			3742.81	-0.005991	1.19401
3741.85	0.001647		3741.85	0.001231	0.301231			3741.85	-0.003093	0.596907		3741.85	-0.005581	0.894419			3741.85	-0.00582	1.19418
3740.88	0.001805		3740.88	0.001404	0.301404			3740.88	-0.002981	0.597019		3740.88	-0.005481	0.894519			3740.88	-0.005685	1.19432
3739.92	0.001747		3739.92	0.001351	0.301351			3739.92	-0.003002	0.596998		3739.92	-0.00559	0.89441			3739.92	-0.005775	1.19422
3738.95	0.001782		3738.95	0.001401	0.301401			3738.95	-0.002965	0.597035		3738.95	-0.005654	0.894346			3738.95	-0.005844	1.19416
3737.99	0.001908		3737.99	0.001528	0.301528			3737.99	-0.002868	0.597132		3737.99	-0.005569	0.894431			3737.99	-0.005734	1.19427
3737.03	0.001935		3737.03	0.001517	0.301517			3737.03	-0.002819	0.597181		3737.03	-0.005514	0.894486			3737.03	-0.005599	1.1944
3736.06	0.001801		3736.06	0.001356	0.301356			3736.06	-0.002838	0.597162		3736.06	-0.005538	0.894462			3736.06	-0.00553	1.19447
3735.1	0.001537		3735.1	0.001108	0.301108			3735.1	-0.002957	0.597043		3735.1	-0.005632	0.894368			3735.1	-0.005588	1.19441
3734.13	0.001443		3734.13	0.001027	0.301027			3734.13	-0.003065	0.596935		3734.13	-0.005702	0.894298			3734.13	-0.005721	1.19428
3733.17	0.00162		3733.17	0.001205	0.301205			3733.17	-0.003017	0.596983		3733.17	-0.005606	0.894394			3733.17	-0.00571	1.19429
3732.2	0.001681		3732.2	0.001272	0.301272			3732.2	-0.002968	0.597032		3732.2	-0.005498	0.894502			3732.2	-0.005658	1.19434
3731.24	0.001517		3731.24	0.001099	0.301099			3731.24	-0.003042	0.596958		3731.24	-0.005615	0.894385			3731.24	-0.005834	1.19417
3730.28	0.001322		3730.28	0.00093	0.30093			3730.28	-0.00313	0.59687		3730.28	-0.005947	0.894053			3730.28	-0.006185	1.19381
3729.31	0.001133		3729.31	0.000827	0.300827			3729.31	-0.003178	0.596822		3729.31	-0.006254	0.893746			3729.31	-0.006466	1.19353
3728.35	0.001133		3728.35	0.000888	0.300888			3728.35	-0.003148	0.596852		3728.35	-0.006267	0.893733			3728.35	-0.006481	1.19352
3727.38	0.001391		3727.38	0.001133	0.301133			3727.38	-0.003028	0.596972		3727.38	-0.005987	0.894013			3727.38	-0.006223	1.19378
3726.42	0.00161		3726.42	0.00127	0.30127			3726.42	-0.00296	0.59704		3726.42	-0.005742	0.894258			3726.42	-0.005981	1.19402
3725.46	0.001597		3725.46	0.001177	0.301177			3725.46	-0.003023	0.596977		3725.46	-0.005742	0.894258			3725.46	-0.005986	1.19401
3724.49	0.001503		3724.49	0.001071	0.301071			3724.49	-0.003098	0.596902		3724.49	-0.005859	0.894141			3724.49	-0.006113	1.19389
3723.53	0.001565		3723.53	0.001158	0.301158			3723.53	-0.003041	0.596959		3723.53	-0.005845	0.894155			3723.53	-0.006094	1.19391
3722.56	0.001646		3722.56	0.001263	0.301263			3722.56	-0.002939	0.597061		3722.56	-0.005725	0.894275			3722.56	-0.005956	1.19404
3721.6	0.001342		3721.6	0.00097	0.30097			3721.6	-0.003076	0.596924		3721.6	-0.00592	0.89408			3721.6	-0.006126	1.19387
3720.64	0.001026		3720.64	0.000671	0.300671			3720.64	-0.003273	0.596727		3720.64	-0.006277	0.893723			3720.64	-0.00645	1.19355
3719.67	0.001102		3719.67	0.000768	0.300768			3719.67	-0.003249	0.596751		3719.67	-0.006332	0.893668			3719.67	-0.006476	1.19352
3718.71	0.001154		3718.71	0.00081	0.30081			3718.71	-0.003205	0.596795		3718.71	-0.006336	0.893664			3718.71	-0.00645	1.19355
3717.74	0.000902		3717.74	0.00055	0.30055			3717.74	-0.003316	0.596684		3717.74	-0.00657	0.89343			3717.74	-0.006649	1.19335
3716.78	0.000729		3716.78	0.000414	0.300414			3716.78	-0.00339	0.59661		3716.78	-0.006711	0.893289			3716.78	-0.006771	1.19323
3715.81	0.000827		3715.81	0.00055	0.30055			3715.81	-0.003346	0.596654		3715.81	-0.006586	0.893414			3715.81	-0.006646	1.19335
3714.85	0.001076		3714.85	0.000791	0.300791			3714.85	-0.003266	0.596734		3714.85	-0.006347	0.893653			3714.85	-0.006413	1.19359
3713.89	0.001405		3713.89	0.001077	0.301077			3713.89	-0.003137	0.596863		3713.89	-0.00608	0.89392			3713.89	-0.006158	1.19384
3712.92	0.001744		3712.92	0.001361	0.301361			3712.92	-0.002941	0.597059		3712.92	-0.005764	0.894236			3712.92	-0.005855	1.19415
3711.96	0.001959		3711.96	0.001489	0.301489			3711.96	-0.002817	0.597183		3711.96	-0.005422	0.894578			3711.96	-0.005557	1.19444
3710.99	0.002077		3710.99	0.001511	0.301511			3710.99	-0.002821	0.597179		3710.99	-0.005169	0.894831			3710.99	-0.005398	1.1946
3710.03	0.002057		3710.03	0.001474	0.301474			3710.03	-0.00285	0.59715		3710.03	-0.005179	0.894821			3710.03	-0.005428	1.19457
3709.07	0.001656		3709.07	0.00114	0.30114			3709.07	-0.002992	0.597008		3709.07	-0.005561	0.894439			3709.07	-0.005756	1.19424
3708.1	0.001127		3708.1	0.00071	0.30071			3708.1	-0.003209	0.596791		3708.1	-0.006078	0.893922			3708.1	-0.006218	1.19378
3707.14	0.000882		3707.14	0.000563	0.300563			3707.14	-0.003304	0.596696		3707.14	-0.006344	0.893656			3707.14	-0.006436	1.19356
3706.17	0.000851		3706.17	0.000586	0.300586			3706.17	-0.003285	0.596715		3706.17	-0.006379	0.893621			3706.17	-0.006459	1.19354
3705.21	0.000811		3705.21	0.000538	0.300538			3705.21	-0.003278	0.596722		3705.21	-0.006416	0.893584			3705.21	-0.00652	1.19348
3704.24	0.000743		3704.24	0.000457	0.300457			3704.24	-0.003301	0.596699		3704.24	-0.006485	0.893515			3704.24	-0.006595	1.19341
3703.28	0.000907		3703.28	0.000621	0.300621			3703.28	-0.003225	0.596775		3703.28	-0.006339	0.893661			3703.28	-0.006441	1.19356
3702.32	0.001228		3702.32	0.000924	0.300924			3702.32	-0.003091	0.596909		3702.32	-0.006049	0.893951			3702.32	-0.006151	1.19385
3701.35	0.00116		3701.35	0.00082	0.30082			3701.35	-0.00317	0.59683		3701.35	-0.006115	0.893885			3701.35	-0.006221	1.19378
3700.39	0.000759		3700.39	0.000409	0.300409			3700.39	-0.003386	0.596614		3700.39	-0.006512	0.893488			3700.39	-0.006617	1.19338
3699.42	0.000509		3699.42	0.000204	0.300204			3699.42	-0.003484	0.596516		3699.42	-0.00676	0.89324			3699.42	-0.006847	1.19315
3698.46	0.000408		3698.46	0.000186	0.300186			3698.46	-0.003509	0.596491		3698.46	-0.006801	0.893199			3698.46	-0.006876	1.19312
3697.5	0.000449		3697.5	0.000287	0.300287			3697.5	-0.003489	0.596511		3697.5	-0.006689	0.893311			3697.5	-0.006777	1.19322
3696.53	0.000581		3696.53	0.000416	0.300416			3696.53	-0.00343	0.59657		3696.53	-0.006554	0.893446			3696.53	-0.006656	1.19334
3695.57	0.000618		3695.57	0.000423	0.300423			3695.57	-0.003408	0.596592		3695.57	-0.006551	0.893449			3695.57	-0.006668	1.19333
3694.6	0.000635		3694.6	0.00043	0.30043			3694.6	-0.003403	0.596597		3694.6	-0.006547	0.893453			3694.6	-0.006715	1.19328
3693.64	0.000808		3693.64	0.000581	0.300581			3693.64	-0.003351	0.596649		3693.64	-0.006404	0.893596			3693.64	-0.006644	1.19336
3692.68	0.001157		3692.68	0.000865	0.300865			3692.68	-0.003227	0.596773		3692.68	-0.006182	0.893818			3692.68	-0.006451	1.19355
3691.71	0.00158		3691.71	0.001192	0.301192			3691.71	-0.003058	0.596942		3691.71	-0.005894	0.894106			3691.71	-0.006143	1.19386
3690.75	0.001905		3690.75	0.001385	0.301385			3690.75	-0.002958	0.597042		3690.75	-0.005573	0.894427			3690.75	-0.005835	1.19416
3689.78	0.002004		3689.78	0.001413	0.301413			3689.78	-0.002962	0.597038		3689.78	-0.005467	0.894533			3689.78	-0.005754	1.19425
3688.82	0.001788		3688.82	0.001245	0.301245			3688.82	-0.003049	0.596951		3688.82	-0.005663	0.894337			3688.82	-0.005917	1.19408
3687.85	0.00132		3687.85	0.000805	0.300805			3687.85	-0.003243	0.596757		3687.85	-0.005967	0.894033			3687.85	-0.006221	1.19378
3686.89	0.000948		3686.89	0.000444	0.300444			3686.89	-0.003403	0.596597		3686.89	-0.006224	0.893776			3686.89	-0.006496	1.1935
3685.93	0.000756		3685.93	0.00035	0.30035			3685.93	-0.00345	0.59655		3685.93	-0.006425	0.893575			3685.93	-0.00665	1.19335
3684.96	0.000669		3684.96	0.000375	0.300375			3684.96	-0.003459	0.596541		3684.96	-0.006515	0.893485			3684.96	-0.006701	1.1933
3684	0.000568		3684	0.000334	0.300334			3684	-0.003505	0.596495		3684	-0.0066	0.8934			3684	-0.006778	1.19322
3683.03	0.000402		3683.03	0.000184	0.300184			3683.03	-0.003578	0.596422		3683.03	-0.006779	0.893221			3683.03	-0.006941	1.19306
3682.07	0.000385		3682.07	0.000157	0.300157			3682.07	-0.003565	0.596435		3682.07	-0.006832	0.893168			3682.07	-0.006994	1.19301
3681.11	0.000688		3681.11	0.000424	0.300424			3681.11	-0.003413	0.596587		3681.11	-0.006597	0.893403			3681.11	-0.00679	1.19321
3680.14	0.001154		3680.14	0.000825	0.300825			3680.14	-0.003217	0.596783		3680.14	-0.006211	0.893789			3680.14	-0.006438	1.19356
3679.18	0.001421		3679.18	0.00101	0.30101			3679.18	-0.003134	0.596866		3679.18	-0.005965	0.894035			3679.18	-0.006211	1.19379
3678.21	0.001575		3678.21	0.001101	0.301101			3678.21	-0.003078	0.596922		3678.21	-0.005854	0.894146			3678.21	-0.006092	1.19391
3677.25	0.001858		3677.25	0.001357	0.301357			3677.25	-0.002926	0.597074		3677.25	-0.005691	0.894309			3677.25	-0.005896	1.1941
3676.28	0.001821		3676.28	0.001334	0.301334			3676.28	-0.002906	0.597094		3676.28	-0.005755	0.894245			3676.28	-0.005845	1.19415
3675.32	0.001211		3675.32	0.000737	0.300737			3675.32	-0.003209	0.596791		3675.32	-0.006184	0.893816			3675.32	-0.006134	1.19387
3674.36	0.000822		3674.36	0.000342	0.300342			3674.36	-0.003496	0.596504		3674.36	-0.006379	0.893621			3674.36	-0.006394	1.19361
3673.39	0.000939		3673.39	0.000509	0.300509			3673.39	-0.003497	0.596503		3673.39	-0.006221	0.893779			3673.39	-0.006399	1.1936
3672.43	0.00124		3672.43	0.000877	0.300877			3672.43	-0.003316	0.596684		3672.43	-0.005993	0.894007			3672.43	-0.006254	1.19375
3671.46	0.001537		3671.46	0.001194	0.301194			3671.46	-0.003106	0.596894		3671.46	-0.005774	0.894226			3671.46	-0.006065	1.19393
3670.5	0.001648		3670.5	0.001257	0.301257			3670.5	-0.00304	0.59696		3670.5	-0.005639	0.894361			3670.5	-0.005948	1.19405
3669.54	0.0016		3669.54	0.001127	0.301127			3669.54	-0.003129	0.596871		3669.54	-0.005655	0.894345			3669.54	-0.005975	1.19402
3668.57	0.001321		3668.57	0.000818	0.300818			3668.57	-0.00329	0.59671		3668.57	-0.005961	0.894039			3668.57	-0.006251	1.19375
3667.61	0.000835		3667.61	0.000397	0.300397			3667.61	-0.00349	0.59651		3667.61	-0.006449	0.893551			3667.61	-0.006655	1.19334
3666.64	0.00051		3666.64	0.000183	0.300183			3666.64	-0.003607	0.596393		3666.64	-0.006767	0.893233			3666.64	-0.006883	1.19312
3665.68	0.000368		3665.68	0.000128	0.300128			3665.68	-0.00364	0.59636		3665.68	-0.006911	0.893089			3665.68	-0.006951	1.19305
3664.71	0.00027		3664.71	6.8e-05	0.300068			3664.71	-0.003651	0.596349		3664.71	-0.007007	0.892993			3664.71	-0.00698	1.19302
3663.75	0.000203		3663.75	3.1e-05	0.300031			3663.75	-0.003652	0.596348		3663.75	-0.007047	0.892953			3663.75	-0.006977	1.19302
3662.79	0.000177		3662.79	4.4e-05	0.300044			3662.79	-0.003636	0.596364		3662.79	-0.007022	0.892978			3662.79	-0.006939	1.19306
3661.82	0.000228		3661.82	0.000102	0.300102			3661.82	-0.003589	0.596411		3661.82	-0.00696	0.89304			3661.82	-0.006883	1.19312
3660.86	0.000389		3660.86	0.000228	0.300228			3660.86	-0.003491	0.596509		3660.86	-0.00685	0.89315			3660.86	-0.006811	1.19319
3659.89	0.000558		3659.89	0.000348	0.300348			3659.89	-0.00339	0.59661		3659.89	-0.006732	0.893268			3659.89	-0.006755	1.19324
3658.93	0.000651		3658.93	0.000395	0.300395			3658.93	-0.00333	0.59667		3658.93	-0.006659	0.893341			3658.93	-0.006692	1.19331
3657.97	0.000892		3657.97	0.000586	0.300586			3657.97	-0.003213	0.596787		3657.97	-0.006479	0.893521			3657.97	-0.00647	1.19353
3657	0.001311		3657	0.000961	0.300961			3657	-0.00302	0.59698		3657	-0.006159	0.893841			3657	-0.006138	1.19386
3656.04	0.001424		3656.04	0.001047	0.301047			3656.04	-0.002991	0.597009		3656.04	-0.006027	0.893973			3656.04	-0.006057	1.19394
3655.07	0.001132		3655.07	0.000766	0.300766			3655.07	-0.003135	0.596865		3655.07	-0.006216	0.893784			3655.07	-0.006273	1.19373
3654.11	0.001025		3654.11	0.000695	0.300695			3654.11	-0.003127	0.596873		3654.11	-0.006318	0.893682			3654.11	-0.006344	1.19366
3653.15	0.001278		3653.15	0.000966	0.300966			3653.15	-0.002934	0.597066		3653.15	-0.006125	0.893875			3653.15	-0.006138	1.19386
3652.18	0.001763		3652.18	0.001434	0.301434			3652.18	-0.002653	0.597347		3652.18	-0.005726	0.894274			3652.18	-0.005759	1.19424
3651.22	0.002187		3651.22	0.001817	0.301817			3651.22	-0.002405	0.597595		3651.22	-0.005318	0.894682			3651.22	-0.005372	1.19463
3650.25	0.002325		3650.25	0.001884	0.301884			3650.25	-0.002312	0.597688		3650.25	-0.005036	0.894964			3650.25	-0.005124	1.19488
3649.29	0.002393		3649.29	0.001843	0.301843			3649.29	-0.002307	0.597693		3649.29	-0.004878	0.895122			3649.29	-0.00501	1.19499
3648.32	0.002573		3648.32	0.001934	0.301934			3648.32	-0.002244	0.597756		3648.32	-0.004794	0.895206			3648.32	-0.004935	1.19507
3647.36	0.002595		3647.36	0.001932	0.301932			3647.36	-0.002226	0.597774		3647.36	-0.004849	0.895151			3647.36	-0.004971	1.19503
3646.4	0.002278		3646.4	0.001659	0.301659			3646.4	-0.00239	0.59761		3646.4	-0.005101	0.894899			3646.4	-0.00523	1.19477
3645.43	0.001806		3645.43	0.001303	0.301303			3645.43	-0.002613	0.597387		3645.43	-0.005495	0.894505			3645.43	-0.005611	1.19439
3644.47	0.00143		3644.47	0.001051	0.301051			3644.47	-0.002753	0.597247		3644.47	-0.005846	0.894154			3644.47	-0.005899	1.1941
3643.5	0.001348		3643.5	0.001014	0.301014			3643.5	-0.002797	0.597203		3643.5	-0.005915	0.894085			3643.5	-0.005935	1.19406
3642.54	0.001443		3642.54	0.001108	0.301108			3642.54	-0.002826	0.597174		3642.54	-0.005792	0.894208			3642.54	-0.005828	1.19417
3641.58	0.001317		3641.58	0.001029	0.301029			3641.58	-0.002935	0.597065		3641.58	-0.005902	0.894098			3641.58	-0.005927	1.19407
3640.61	0.001039		3640.61	0.000821	0.300821			3640.61	-0.003033	0.596967		3640.61	-0.006239	0.893761			3640.61	-0.006199	1.1938
3639.65	0.000962		3639.65	0.000779	0.300779			3639.65	-0.003012	0.596988		3639.65	-0.006388	0.893612			3639.65	-0.006316	1.19368
3638.68	0.001072		3638.68	0.000897	0.300897			3638.68	-0.002946	0.597054		3638.68	-0.006265	0.893735			3638.68	-0.006243	1.19376
3637.72	0.001061		3637.72	0.000898	0.300898			3637.72	-0.002974	0.597026		3637.72	-0.006199	0.893801			3637.72	-0.006239	1.19376
3636.75	0.000855		3636.75	0.000708	0.300708			3636.75	-0.003085	0.596915		3636.75	-0.006375	0.893625			3636.75	-0.006405	1.19359
3635.79	0.000789		3635.79	0.000634	0.300634			3635.79	-0.00312	0.59688		3635.79	-0.006466	0.893534			3635.79	-0.006464	1.19354
3634.83	0.000993		3634.83	0.000798	0.300798			3634.83	-0.003059	0.596941		3634.83	-0.006274	0.893726			3634.83	-0.006292	1.19371
3633.86	0.001179		3633.86	0.000933	0.300933			3633.86	-0.003036	0.596964		3633.86	-0.006073	0.893927			3633.86	-0.006145	1.19385
3632.9	0.001148		3632.9	0.000856	0.300856			3632.9	-0.003084	0.596916		3632.9	-0.006109	0.893891			3632.9	-0.006209	1.19379
3631.93	0.001242		3631.93	0.000895	0.300895			3631.93	-0.003036	0.596964		3631.93	-0.006094	0.893906			3631.93	-0.006206	1.19379
3630.97	0.001598		3630.97	0.001187	0.301187			3630.97	-0.002889	0.597111		3630.97	-0.005844	0.894156			3630.97	-0.00598	1.19402
3630.01	0.001764		3630.01	0.001306	0.301306			3630.01	-0.002865	0.597135		3630.01	-0.005712	0.894288			3630.01	-0.005825	1.19417
3629.04	0.001365		3629.04	0.000853	0.300853			3629.04	-0.003123	0.596877		3629.04	-0.005999	0.894001			3629.04	-0.006034	1.19397
3628.08	0.001041		3628.08	0.000448	0.300448			3628.08	-0.003337	0.596663		3628.08	-0.006191	0.893809			3628.08	-0.006258	1.19374
3627.11	0.001273		3627.11	0.000678	0.300678			3627.11	-0.003201	0.596799		3627.11	-0.006017	0.893983			3627.11	-0.006186	1.19381
3626.15	0.001448		3626.15	0.000956	0.300956			3626.15	-0.003013	0.596987		3626.15	-0.005951	0.894049			3626.15	-0.006127	1.19387
3625.18	0.001273		3625.18	0.000913	0.300913			3625.18	-0.002979	0.597021		3625.18	-0.006145	0.893855			3625.18	-0.006242	1.19376
3624.22	0.001087		3624.22	0.000817	0.300817			3624.22	-0.002985	0.597015		3624.22	-0.006308	0.893692			3624.22	-0.006355	1.19364
3623.26	0.001117		3623.26	0.00087	0.30087			3623.26	-0.002939	0.597061		3623.26	-0.006261	0.893739			3623.26	-0.006332	1.19367
3622.29	0.001288		3622.29	0.001023	0.301023			3622.29	-0.002871	0.597129		3622.29	-0.006076	0.893924			3622.29	-0.006189	1.19381
3621.33	0.001536		3621.33	0.001243	0.301243			3621.33	-0.002809	0.597191		3621.33	-0.005813	0.894187			3621.33	-0.005951	1.19405
3620.36	0.001695		3620.36	0.001369	0.301369			3620.36	-0.002835	0.597165		3620.36	-0.005579	0.894421			3620.36	-0.005751	1.19425
3619.4	0.001658		3619.4	0.001293	0.301293			3619.4	-0.002954	0.597046		3619.4	-0.005483	0.894517			3619.4	-0.005713	1.19429
3618.44	0.00159		3618.44	0.001194	0.301194			3618.44	-0.003015	0.596985		3618.44	-0.005499	0.894501			3618.44	-0.005761	1.19424
3617.47	0.001477		3617.47	0.001089	0.301089			3617.47	-0.003006	0.596994		3617.47	-0.005654	0.894346			3617.47	-0.00588	1.19412
3616.51	0.001443		3616.51	0.001105	0.301105			3616.51	-0.002933	0.597067		3616.51	-0.005765	0.894235			3616.51	-0.005936	1.19406
3615.54	0.001679		3615.54	0.001358	0.301358			3615.54	-0.002794	0.597206		3615.54	-0.005603	0.894397			3615.54	-0.005761	1.19424
3614.58	0.001922		3614.58	0.001545	0.301545			3614.58	-0.002719	0.597281		3614.58	-0.005366	0.894634			3614.58	-0.005551	1.19445
3613.62	0.001951		3613.62	0.001516	0.301516			3613.62	-0.002744	0.597256		3613.62	-0.005311	0.894689			3613.62	-0.005501	1.1945
3612.65	0.001826		3612.65	0.001377	0.301377			3612.65	-0.002804	0.597196		3612.65	-0.005426	0.894574			3612.65	-0.005562	1.19444
3611.69	0.001643		3611.69	0.001209	0.301209			3611.69	-0.002838	0.597162		3611.69	-0.005655	0.894345			3611.69	-0.00571	1.19429
3610.72	0.001656		3610.72	0.001255	0.301255			3610.72	-0.002735	0.597265		3610.72	-0.00579	0.89421			3610.72	-0.005783	1.19422
3609.76	0.001778		3609.76	0.001378	0.301378			3609.76	-0.00262	0.59738		3609.76	-0.005752	0.894248			3609.76	-0.005739	1.19426
3608.79	0.00179		3608.79	0.001325	0.301325			3608.79	-0.002658	0.597342		3608.79	-0.005665	0.894335			3608.79	-0.005716	1.19428
3607.83	0.001767		3607.83	0.001257	0.301257			3607.83	-0.002747	0.597253		3607.83	-0.005619	0.894381			3607.83	-0.005724	1.19428
3606.87	0.001653		3606.87	0.0012	0.3012			3606.87	-0.002792	0.597208		3606.87	-0.005723	0.894277			3606.87	-0.005799	1.1942
3605.9	0.001413		3605.9	0.001103	0.301103			3605.9	-0.002785	0.597215		3605.9	-0.005963	0.894037			3605.9	-0.005938	1.19406
3604.94	0.001271		3604.94	0.001118	0.301118			3604.94	-0.002714	0.597286		3604.94	-0.006093	0.893907			3604.94	-0.005972	1.19403
3603.97	0.001293		3603.97	0.001237	0.301237			3603.97	-0.002634	0.597366		3603.97	-0.006034	0.893966			3603.97	-0.005884	1.19412
3603.01	0.001436		3603.01	0.001383	0.301383			3603.01	-0.00257	0.59743		3603.01	-0.005881	0.894119			3603.01	-0.005769	1.19423
3602.05	0.001623		3602.05	0.001509	0.301509			3602.05	-0.002522	0.597478		3602.05	-0.005704	0.894296			3602.05	-0.005679	1.19432
3601.08	0.001768		3601.08	0.001594	0.301594			3601.08	-0.002507	0.597493		3601.08	-0.005505	0.894495			3601.08	-0.005594	1.19441
3600.12	0.001851		3600.12	0.001656	0.301656			3600.12	-0.002495	0.597505		3600.12	-0.005353	0.894647			3600.12	-0.005516	1.19448
3599.15	0.001897		3599.15	0.001704	0.301704			3599.15	-0.002475	0.597525		3599.15	-0.005324	0.894676			3599.15	-0.005497	1.1945
3598.19	0.001847		3598.19	0.001644	0.301644			3598.19	-0.002503	0.597497		3598.19	-0.005432	0.894568			3598.19	-0.005592	1.19441
3597.22	0.00175		3597.22	0.001525	0.301525			3597.22	-0.002541	0.597459		3597.22	-0.005576	0.894424			3597.22	-0.005692	1.19431
3596.26	0.001767		3596.26	0.001508	0.301508			3596.26	-0.002537	0.597463		3596.26	-0.005569	0.894431			3596.26	-0.005649	1.19435
3595.3	0.001777		3595.3	0.001471	0.301471			3595.3	-0.002561	0.597439		3595.3	-0.005523	0.894477			3595.3	-0.005608	1.19439
3594.33	0.00171		3594.33	0.001395	0.301395			3594.33	-0.002581	0.597419		3594.33	-0.005597	0.894403			3594.33	-0.005676	1.19432
3593.37	0.001643		3593.37	0.001372	0.301372			3593.37	-0.002563	0.597437		3593.37	-0.005705	0.894295			3593.37	-0.005715	1.19429
3592.4	0.001464		3592.4	0.001267	0.301267			3592.4	-0.00258	0.59742		3592.4	-0.005857	0.894143			3592.4	-0.005759	1.19424
3591.44	0.00132		3591.44	0.001201	0.301201			3591.44	-0.002564	0.597436		3591.44	-0.005956	0.894044			3591.44	-0.005806	1.19419
3590.48	0.001462		3590.48	0.001363	0.301363			3590.48	-0.002444	0.597556		3590.48	-0.005854	0.894146			3590.48	-0.005734	1.19427
3589.51	0.001807		3589.51	0.001636	0.301636			3589.51	-0.002288	0.597712		3589.51	-0.005641	0.894359			3589.51	-0.005567	1.19443
3588.55	0.002154		3588.55	0.001832	0.301832			3588.55	-0.002213	0.597787		3588.55	-0.005382	0.894618			3588.55	-0.005352	1.19465
3587.58	0.002304		3587.58	0.00182	0.30182			3587.58	-0.00229	0.59771		3587.58	-0.005134	0.894866			3587.58	-0.005165	1.19483
3586.62	0.002114		3586.62	0.001593	0.301593			3586.62	-0.002432	0.597568		3586.62	-0.005128	0.894872			3586.62	-0.005183	1.19482
3585.65	0.001855		3585.65	0.001462	0.301462			3585.65	-0.00243	0.59757		3585.65	-0.005309	0.894691			3585.65	-0.005319	1.19468
3584.69	0.001874		3584.69	0.001647	0.301647			3584.69	-0.002252	0.597748		3584.69	-0.005374	0.894626			3584.69	-0.005333	1.19467
3583.73	0.002022		3583.73	0.001904	0.301904			3583.73	-0.002061	0.597939		3583.73	-0.005316	0.894684			3583.73	-0.005264	1.19474
3582.76	0.002046		3582.76	0.001981	0.301981			3582.76	-0.001959	0.598041		3582.76	-0.005283	0.894717			3582.76	-0.00523	1.19477
3581.8	0.001995		3581.8	0.001966	0.301966			3581.8	-0.001892	0.598108		3581.8	-0.005264	0.894736			3581.8	-0.005183	1.19482
3580.83	0.002095		3580.83	0.002091	0.302091			3580.83	-0.001759	0.598241		3580.83	-0.005103	0.894897			3580.83	-0.00499	1.19501
3579.87	0.002319		3579.87	0.002312	0.302312			3579.87	-0.001573	0.598427		3579.87	-0.004856	0.895144			3579.87	-0.004719	1.19528
3578.91	0.002487		3578.91	0.002465	0.302465			3578.91	-0.001402	0.598598		3578.91	-0.004718	0.895282			3578.91	-0.004553	1.19545
3577.94	0.002679		3577.94	0.002652	0.302652			3577.94	-0.001219	0.598781		3577.94	-0.004591	0.895409			3577.94	-0.004399	1.1956
3576.98	0.002866		3576.98	0.002856	0.302856			3576.98	-0.001061	0.598939		3576.98	-0.004409	0.895591			3576.98	-0.004204	1.1958
3576.01	0.002885		3576.01	0.002898	0.302898			3576.01	-0.00102	0.59898		3576.01	-0.004329	0.895671			3576.01	-0.004127	1.19587
3575.05	0.002857		3575.05	0.002854	0.302854			3575.05	-0.00104	0.59896		3575.05	-0.004343	0.895657			3575.05	-0.004177	1.19582
3574.09	0.002787		3574.09	0.002733	0.302733			3574.09	-0.001102	0.598898		3574.09	-0.004463	0.895537			3574.09	-0.004344	1.19566
3573.12	0.002537		3573.12	0.002463	0.302463			3573.12	-0.001265	0.598735		3573.12	-0.004766	0.895234			3573.12	-0.004646	1.19535
3572.16	0.002295		3572.16	0.002228	0.302228			3572.16	-0.001449	0.598551		3572.16	-0.005039	0.894961			3572.16	-0.004898	1.1951
3571.19	0.00226		3571.19	0.002172	0.302172			3571.19	-0.001553	0.598447		3571.19	-0.005075	0.894925			3571.19	-0.004955	1.19504
3570.23	0.002373		3570.23	0.002223	0.302223			3570.23	-0.001586	0.598414		3570.23	-0.004958	0.895042			3570.23	-0.004869	1.19513
3569.26	0.002551		3569.26	0.0023	0.3023			3569.26	-0.001589	0.598411		3569.26	-0.004804	0.895196			3569.26	-0.004743	1.19526
3568.3	0.002732		3568.3	0.00231	0.30231			3568.3	-0.001633	0.598367		3568.3	-0.004628	0.895372			3568.3	-0.004646	1.19535
3567.34	0.002808		3567.34	0.002216	0.302216			3567.34	-0.00175	0.59825		3567.34	-0.004505	0.895495			3567.34	-0.004635	1.19537
3566.37	0.002726		3566.37	0.002097	0.302097			3566.37	-0.001861	0.598139		3566.37	-0.004532	0.895468			3566.37	-0.004752	1.19525
3565.41	0.002531		3565.41	0.002018	0.302018			3565.41	-0.001931	0.598069		3565.41	-0.004703	0.895297			3565.41	-0.004953	1.19505
3564.44	0.002424		3564.44	0.002087	0.302087			3564.44	-0.001942	0.598058		3564.44	-0.004839	0.895161			3564.44	-0.005056	1.19494
3563.48	0.002379		3563.48	0.002177	0.302177			3563.48	-0.001925	0.598075		3563.48	-0.004891	0.895109			3563.48	-0.005051	1.19495
3562.52	0.002227		3562.52	0.002117	0.302117			3562.52	-0.001952	0.598048		3562.52	-0.005017	0.894983			3562.52	-0.005093	1.19491
3561.55	0.00211		3561.55	0.002059	0.302059			3561.55	-0.00197	0.59803		3561.55	-0.005155	0.894845			3561.55	-0.005159	1.19484
3560.59	0.002121		3560.59	0.002073	0.302073			3560.59	-0.001935	0.598065		3560.59	-0.005188	0.894812			3560.59	-0.005187	1.19481
3559.62	0.002061		3559.62	0.002004	0.302004			3559.62	-0.001921	0.598079		3559.62	-0.005244	0.894756			3559.62	-0.005268	1.19473
3558.66	0.00191		3558.66	0.001882	0.301882			3558.66	-0.001943	0.598057		3558.66	-0.005353	0.894647			3558.66	-0.005367	1.19463
3557.69	0.001838		3557.69	0.001846	0.301846			3557.69	-0.001957	0.598043		3557.69	-0.005401	0.894599			3557.69	-0.005362	1.19464
3556.73	0.001783		3556.73	0.001814	0.301814			3556.73	-0.001989	0.598011		3556.73	-0.005462	0.894538			3556.73	-0.005346	1.19465
3555.77	0.001714		3555.77	0.001757	0.301757			3555.77	-0.002017	0.597983		3555.77	-0.005573	0.894427			3555.77	-0.0054	1.1946
3554.8	0.001794		3554.8	0.00182	0.30182			3554.8	-0.001983	0.598017		3554.8	-0.00557	0.89443			3554.8	-0.005405	1.19459
3553.84	0.00201		3553.84	0.001991	0.301991			3553.84	-0.001934	0.598066		3553.84	-0.005411	0.894589			3553.84	-0.00531	1.19469
3552.87	0.002177		3552.87	0.002098	0.302098			3552.87	-0.00195	0.59805		3552.87	-0.005227	0.894773			3552.87	-0.005206	1.19479
3551.91	0.002126		3551.91	0.001996	0.301996			3551.91	-0.002041	0.597959		3551.91	-0.005202	0.894798			3551.91	-0.005213	1.19479
3550.95	0.001912		3550.95	0.001783	0.301783			3550.95	-0.002115	0.597885		3550.95	-0.005378	0.894622			3550.95	-0.005352	1.19465
3549.98	0.001806		3549.98	0.001695	0.301695			3549.98	-0.00209	0.59791		3549.98	-0.005526	0.894474			3549.98	-0.005456	1.19454
3549.02	0.001922		3549.02	0.001781	0.301781			3549.02	-0.002009	0.597991		3549.02	-0.005491	0.894509			3549.02	-0.005405	1.19459
3548.05	0.002139		3548.05	0.001926	0.301926			3548.05	-0.001959	0.598041		3548.05	-0.005366	0.894634			3548.05	-0.005302	1.1947
3547.09	0.002263		3547.09	0.001993	0.301993			3547.09	-0.001983	0.598017		3547.09	-0.005309	0.894691			3547.09	-0.005317	1.19468
3546.12	0.002297		3546.12	0.002017	0.302017			3546.12	-0.002019	0.597981		3546.12	-0.005271	0.894729			3546.12	-0.00536	1.19464
3545.16	0.002341		3545.16	0.00208	0.30208			3545.16	-0.002041	0.597959		3545.16	-0.005165	0.894835			3545.16	-0.00529	1.19471
3544.2	0.002329		3544.2	0.002106	0.302106			3544.2	-0.002083	0.597917		3544.2	-0.005118	0.894882			3544.2	-0.005227	1.19477
3543.23	0.002185		3543.23	0.002019	0.302019			3543.23	-0.002114	0.597886		3543.23	-0.005244	0.894756			3543.23	-0.005298	1.1947
3542.27	0.001934		3542.27	0.001833	0.301833			3542.27	-0.002117	0.597883		3542.27	-0.005494	0.894506			3542.27	-0.00547	1.19453
3541.3	0.001697		3541.3	0.001669	0.301669			3541.3	-0.002119	0.597881		3541.3	-0.005689	0.894311			3541.3	-0.00561	1.19439
3540.34	0.001568		3540.34	0.001625	0.301625			3540.34	-0.002137	0.597863		3540.34	-0.005729	0.894271			3540.34	-0.005637	1.19436
3539.38	0.001523		3539.38	0.001655	0.301655			3539.38	-0.002152	0.597848		3539.38	-0.005744	0.894256			3539.38	-0.005616	1.19438
3538.41	0.001565		3538.41	0.001716	0.301716			3538.41	-0.002133	0.597867		3538.41	-0.005784	0.894216			3538.41	-0.005594	1.19441
3537.45	0.001749		3537.45	0.001849	0.301849			3537.45	-0.002076	0.597924		3537.45	-0.005687	0.894313			3537.45	-0.005514	1.19449
3536.48	0.001918		3536.48	0.001958	0.301958			3536.48	-0.002037	0.597963		3536.48	-0.005503	0.894497			3536.48	-0.005418	1.19458
3535.52	0.001815		3535.52	0.001873	0.301873			3535.52	-0.002065	0.597935		3535.52	-0.005499	0.894501			3535.52	-0.005443	1.19456
3534.56	0.001605		3534.56	0.001742	0.301742			3534.56	-0.002087	0.597913		3534.56	-0.005622	0.894378			3534.56	-0.005526	1.19447
3533.59	0.001539		3533.59	0.001745	0.301745			3533.59	-0.002066	0.597934		3533.59	-0.005671	0.894329			3533.59	-0.005561	1.19444
3532.63	0.00161		3532.63	0.00182	0.30182			3532.63	-0.002035	0.597965		3532.63	-0.005614	0.894386			3532.63	-0.005515	1.19449
3531.66	0.001753		3531.66	0.0019	0.3019			3531.66	-0.001996	0.598004		3531.66	-0.005479	0.894521			3531.66	-0.005386	1.19461
3530.7	0.00189		3530.7	0.001979	0.301979			3530.7	-0.00197	0.59803		3530.7	-0.00537	0.89463			3530.7	-0.005282	1.19472
3529.73	0.002019		3529.73	0.002074	0.302074			3529.73	-0.001963	0.598037		3529.73	-0.005303	0.894697			3529.73	-0.005234	1.19477
3528.77	0.002203		3528.77	0.002178	0.302178			3528.77	-0.001947	0.598053		3528.77	-0.005162	0.894838			3528.77	-0.005166	1.19483
3527.81	0.002357		3527.81	0.002204	0.302204			3527.81	-0.001929	0.598071		3527.81	-0.005041	0.894959			3527.81	-0.005154	1.19485
3526.84	0.002334		3526.84	0.002103	0.302103			3526.84	-0.001945	0.598055		3526.84	-0.005115	0.894885			3526.84	-0.005248	1.19475
3525.88	0.002201		3525.88	0.001994	0.301994			3525.88	-0.001977	0.598023		3525.88	-0.005281	0.894719			3525.88	-0.005318	1.19468
3524.91	0.00218		3524.91	0.002008	0.302008			3524.91	-0.001976	0.598024		3524.91	-0.00533	0.89467			3524.91	-0.005291	1.19471
3523.95	0.002303		3523.95	0.002094	0.302094			3523.95	-0.001969	0.598031		3523.95	-0.005226	0.894774			3523.95	-0.005217	1.19478
3522.99	0.002339		3522.99	0.0021	0.3021			3522.99	-0.00201	0.59799		3522.99	-0.005131	0.894869			3522.99	-0.005195	1.1948
3522.02	0.002128		3522.02	0.001981	0.301981			3522.02	-0.002071	0.597929		3522.02	-0.005244	0.894756			3522.02	-0.005278	1.19472
3521.06	0.001884		3521.06	0.001885	0.301885			3521.06	-0.002078	0.597922		3521.06	-0.005452	0.894548			3521.06	-0.005361	1.19464
3520.09	0.001801		3520.09	0.001892	0.301892			3520.09	-0.002037	0.597963		3520.09	-0.005528	0.894472			3520.09	-0.005363	1.19464
3519.13	0.001804		3519.13	0.001922	0.301922			3519.13	-0.002005	0.597995		3519.13	-0.005505	0.894495			3519.13	-0.005343	1.19466
3518.16	0.001782		3518.16	0.001919	0.301919			3518.16	-0.001997	0.598003		3518.16	-0.005524	0.894476			3518.16	-0.005334	1.19467
3517.2	0.001739		3517.2	0.001903	0.301903			3517.2	-0.00199	0.59801		3517.2	-0.005581	0.894419			3517.2	-0.005317	1.19468
3516.24	0.001694		3516.24	0.001886	0.301886			3516.24	-0.00198	0.59802		3516.24	-0.005632	0.894368			3516.24	-0.005339	1.19466
3515.27	0.001656		3515.27	0.001884	0.301884			3515.27	-0.001974	0.598026		3515.27	-0.005672	0.894328			3515.27	-0.005403	1.1946
3514.31	0.001659		3514.31	0.001916	0.301916			3514.31	-0.001972	0.598028		3514.31	-0.005672	0.894328			3514.31	-0.005425	1.19457
3513.34	0.001722		3513.34	0.001985	0.301985			3513.34	-0.001963	0.598037		3513.34	-0.00562	0.89438			3513.34	-0.005396	1.1946
3512.38	0.001818		3512.38	0.002072	0.302072			3512.38	-0.001951	0.598049		3512.38	-0.005532	0.894468			3512.38	-0.005343	1.19466
3511.42	0.001926		3511.42	0.002165	0.302165			3511.42	-0.001924	0.598076		3511.42	-0.005427	0.894573			3511.42	-0.005257	1.19474
3510.45	0.00207		3510.45	0.002263	0.302263			3510.45	-0.00187	0.59813		3510.45	-0.005335	0.894665			3510.45	-0.005181	1.19482
3509.49	0.002161		3509.49	0.00226	0.30226			3509.49	-0.00185	0.59815		3509.49	-0.005319	0.894681			3509.49	-0.005201	1.1948
3508.52	0.002035		3508.52	0.002084	0.302084			3508.52	-0.001905	0.598095		3508.52	-0.005431	0.894569			3508.52	-0.005305	1.1947
3507.56	0.001818		3507.56	0.001931	0.301931			3507.56	-0.00195	0.59805		3507.56	-0.005528	0.894472			3507.56	-0.005351	1.19465
3506.6	0.001747		3506.6	0.001941	0.301941			3506.6	-0.00193	0.59807		3506.6	-0.005467	0.894533			3506.6	-0.005289	1.19471
3505.63	0.001872		3505.63	0.002064	0.302064			3505.63	-0.001875	0.598125		3505.63	-0.005295	0.894705			3505.63	-0.005177	1.19482
3504.67	0.002127		3504.67	0.002232	0.302232			3504.67	-0.001831	0.598169		3504.67	-0.005118	0.894882			3504.67	-0.005071	1.19493
3503.7	0.002354		3503.7	0.002369	0.302369			3503.7	-0.001833	0.598167		3503.7	-0.005022	0.894978			3503.7	-0.005034	1.19497
3502.74	0.002379		3502.74	0.002373	0.302373			3502.74	-0.001859	0.598141		3502.74	-0.005042	0.894958			3502.74	-0.005085	1.19491
3501.77	0.002196		3501.77	0.002246	0.302246			3501.77	-0.001872	0.598128		3501.77	-0.005167	0.894833			3501.77	-0.005184	1.19482
3500.81	0.001976		3500.81	0.002141	0.302141			3500.81	-0.001862	0.598138		3500.81	-0.00534	0.89466			3500.81	-0.00528	1.19472
3499.85	0.001845		3499.85	0.002133	0.302133			3499.85	-0.001837	0.598163		3499.85	-0.005466	0.894534			3499.85	-0.00534	1.19466
3498.88	0.00179		3498.88	0.002151	0.302151			3498.88	-0.001819	0.598181		3498.88	-0.005507	0.894493			3498.88	-0.005361	1.19464
3497.92	0.001815		3497.92	0.002182	0.302182			3497.92	-0.001798	0.598202		3497.92	-0.005477	0.894523			3497.92	-0.005324	1.19468
3496.95	0.001935		3496.95	0.00226	0.30226			3496.95	-0.001774	0.598226		3496.95	-0.005406	0.894594			3496.95	-0.005236	1.19476
3495.99	0.002025		3495.99	0.002317	0.302317			3495.99	-0.00178	0.59822		3495.99	-0.005351	0.894649			3495.99	-0.005184	1.19482
3495.03	0.00197		3495.03	0.002274	0.302274			3495.03	-0.001808	0.598192		3495.03	-0.005369	0.894631			3495.03	-0.005209	1.19479
3494.06	0.001847		3494.06	0.002163	0.302163			3494.06	-0.001852	0.598148		3494.06	-0.00544	0.89456			3494.06	-0.005238	1.19476
3493.1	0.001768		3493.1	0.002081	0.302081			3493.1	-0.001902	0.598098		3493.1	-0.005502	0.894498			3493.1	-0.005241	1.19476
3492.13	0.001767		3492.13	0.00209	0.30209			3492.13	-0.001899	0.598101		3492.13	-0.005533	0.894467			3492.13	-0.005261	1.19474
3491.17	0.001808		3491.17	0.002146	0.302146			3491.17	-0.00185	0.59815		3491.17	-0.005521	0.894479			3491.17	-0.005262	1.19474
3490.2	0.001855		3490.2	0.002188	0.302188			3490.2	-0.001822	0.598178		3490.2	-0.005449	0.894551			3490.2	-0.005181	1.19482
3489.24	0.001951		3489.24	0.002239	0.302239			3489.24	-0.001824	0.598176		3489.24	-0.005311	0.894689			3489.24	-0.005059	1.19494
3488.28	0.002048		3488.28	0.002278	0.302278			3488.28	-0.001849	0.598151		3488.28	-0.005183	0.894817			3488.28	-0.005001	1.195
3487.31	0.002016		3487.31	0.002255	0.302255			3487.31	-0.001893	0.598107		3487.31	-0.005213	0.894787			3487.31	-0.005088	1.19491
3486.35	0.001948		3486.35	0.002246	0.302246			3486.35	-0.001911	0.598089		3486.35	-0.005387	0.894613			3486.35	-0.00525	1.19475
3485.38	0.001942		3485.38	0.002278	0.302278			3485.38	-0.001911	0.598089		3485.38	-0.005518	0.894482			3485.38	-0.005331	1.19467
3484.42	0.001944		3484.42	0.00229	0.30229			3484.42	-0.00191	0.59809		3484.42	-0.005505	0.894495			3484.42	-0.005269	1.19473
3483.46	0.002013		3483.46	0.002312	0.302312			3483.46	-0.001881	0.598119		3483.46	-0.005352	0.894648			3483.46	-0.005116	1.19488
3482.49	0.002177		3482.49	0.002356	0.302356			3482.49	-0.001832	0.598168		3482.49	-0.005148	0.894852			3482.49	-0.004994	1.19501
3481.53	0.002276		3481.53	0.002356	0.302356			3481.53	-0.00181	0.59819		3481.53	-0.005004	0.894996			3481.53	-0.00496	1.19504
3480.56	0.002217		3480.56	0.002303	0.302303			3480.56	-0.001814	0.598186		3480.56	-0.00497	0.89503			3480.56	-0.004972	1.19503
3479.6	0.002076		3479.6	0.002239	0.302239			3479.6	-0.001813	0.598187		3479.6	-0.005056	0.894944			3479.6	-0.005033	1.19497
3478.63	0.001967		3478.63	0.002217	0.302217			3478.63	-0.001775	0.598225		3478.63	-0.005209	0.894791			3478.63	-0.005137	1.19486
3477.67	0.001961		3477.67	0.002273	0.302273			3477.67	-0.001706	0.598294		3477.67	-0.005339	0.894661			3477.67	-0.00521	1.19479
3476.71	0.002066		3476.71	0.002374	0.302374			3476.71	-0.001643	0.598357		3476.71	-0.005397	0.894603			3476.71	-0.005223	1.19478
3475.74	0.002217		3475.74	0.002461	0.302461			3475.74	-0.001614	0.598386		3475.74	-0.005346	0.894654			3475.74	-0.005176	1.19482
3474.78	0.00229		3474.78	0.002489	0.302489			3474.78	-0.001627	0.598373		3474.78	-0.005237	0.894763			3474.78	-0.005107	1.19489
3473.81	0.002232		3473.81	0.00246	0.30246			3473.81	-0.001656	0.598344		3473.81	-0.005193	0.894807			3473.81	-0.005083	1.19492
3472.85	0.002143		3472.85	0.002422	0.302422			3472.85	-0.00166	0.59834		3472.85	-0.005191	0.894809			3472.85	-0.005084	1.19492
3471.89	0.002111		3471.89	0.002382	0.302382			3471.89	-0.001646	0.598354		3471.89	-0.005169	0.894831			3471.89	-0.00508	1.19492
3470.92	0.002112		3470.92	0.002341	0.302341			3470.92	-0.001646	0.598354		3470.92	-0.005174	0.894826			3470.92	-0.005109	1.19489
3469.96	0.002087		3469.96	0.002329	0.302329			3469.96	-0.001657	0.598343		3469.96	-0.005252	0.894748			3469.96	-0.005188	1.19481
3468.99	0.002059		3468.99	0.002352	0.302352			3468.99	-0.00166	0.59834		3468.99	-0.005336	0.894664			3468.99	-0.005234	1.19477
3468.03	0.002112		3468.03	0.002411	0.302411			3468.03	-0.001665	0.598335		3468.03	-0.005315	0.894685			3468.03	-0.005172	1.19483
3467.07	0.002211		3467.07	0.002473	0.302473			3467.07	-0.001668	0.598332		3467.07	-0.005216	0.894784			3467.07	-0.005072	1.19493
3466.1	0.002248		3466.1	0.00247	0.30247			3466.1	-0.00164	0.59836		3466.1	-0.005184	0.894816			3466.1	-0.005044	1.19496
3465.14	0.002228		3465.14	0.002428	0.302428			3465.14	-0.001596	0.598404		3465.14	-0.005226	0.894774			3465.14	-0.005063	1.19494
3464.17	0.00224		3464.17	0.002446	0.302446			3464.17	-0.001574	0.598426		3464.17	-0.00524	0.89476			3464.17	-0.005057	1.19494
3463.21	0.002309		3463.21	0.002522	0.302522			3463.21	-0.001583	0.598417		3463.21	-0.005195	0.894805			3463.21	-0.005036	1.19496
3462.24	0.002347		3462.24	0.002554	0.302554			3462.24	-0.001615	0.598385		3462.24	-0.005119	0.894881			3462.24	-0.005022	1.19498
3461.28	0.002271		3461.28	0.002501	0.302501			3461.28	-0.001667	0.598333		3461.28	-0.005056	0.894944			3461.28	-0.00501	1.19499
3460.32	0.002146		3460.32	0.00242	0.30242			3460.32	-0.00169	0.59831		3460.32	-0.005059	0.894941			3460.32	-0.005015	1.19498
3459.35	0.002092		3459.35	0.002389	0.302389			3459.35	-0.001638	0.598362		3459.35	-0.00511	0.89489			3459.35	-0.005036	1.19496
3458.39	0.002112		3458.39	0.002435	0.302435			3458.39	-0.00156	0.59844		3458.39	-0.00513	0.89487			3458.39	-0.005022	1.19498
3457.42	0.002137		3457.42	0.002508	0.302508			3457.42	-0.001528	0.598472		3457.42	-0.005106	0.894894			3457.42	-0.00497	1.19503
3456.46	0.002145		3456.46	0.002538	0.302538			3456.46	-0.00155	0.59845		3456.46	-0.005097	0.894903			3456.46	-0.004944	1.19506
3455.5	0.002147		3455.5	0.002525	0.302525			3455.5	-0.001588	0.598412		3455.5	-0.005121	0.894879			3455.5	-0.004968	1.19503
3454.53	0.002143		3454.53	0.002532	0.302532			3454.53	-0.001603	0.598397		3454.53	-0.005148	0.894852			3454.53	-0.004991	1.19501
3453.57	0.002128		3453.57	0.002563	0.302563			3453.57	-0.001585	0.598415		3453.57	-0.005157	0.894843			3453.57	-0.004991	1.19501
3452.6	0.002105		3452.6	0.002557	0.302557			3452.6	-0.00156	0.59844		3452.6	-0.005156	0.894844			3452.6	-0.004997	1.195
3451.64	0.002079		3451.64	0.002505	0.302505			3451.64	-0.001557	0.598443		3451.64	-0.005164	0.894836			3451.64	-0.005008	1.19499
3450.67	0.002056		3450.67	0.002468	0.302468			3450.67	-0.001586	0.598414		3450.67	-0.005166	0.894834			3450.67	-0.004996	1.195
3449.71	0.002089		3449.71	0.002522	0.302522			3449.71	-0.001607	0.598393		3449.71	-0.005116	0.894884			3449.71	-0.00494	1.19506
3448.75	0.002265		3448.75	0.002678	0.302678			3448.75	-0.001561	0.598439		3448.75	-0.004993	0.895007			3448.75	-0.004845	1.19515
3447.78	0.002528		3447.78	0.002799	0.302799			3447.78	-0.001502	0.598498		3447.78	-0.004857	0.895143			3447.78	-0.004777	1.19522
3446.82	0.002596		3446.82	0.002715	0.302715			3446.82	-0.001519	0.598481		3446.82	-0.004833	0.895167			3446.82	-0.004801	1.1952
3445.85	0.002404		3445.85	0.002549	0.302549			3445.85	-0.001552	0.598448		3445.85	-0.004929	0.895071			3445.85	-0.004878	1.19512
3444.89	0.002252		3444.89	0.002537	0.302537			3444.89	-0.001511	0.598489		3444.89	-0.005019	0.894981			3444.89	-0.004931	1.19507
3443.93	0.002274		3443.93	0.002656	0.302656			3443.93	-0.001447	0.598553		3443.93	-0.00503	0.89497			3443.93	-0.004928	1.19507
3442.96	0.002359		3442.96	0.002767	0.302767			3442.96	-0.001419	0.598581		3442.96	-0.00497	0.89503			3442.96	-0.004865	1.19514
3442	0.002333		3442	0.002757	0.302757			3442	-0.001445	0.598555		3442	-0.004947	0.895053			3442	-0.004828	1.19517
3441.03	0.002221		3441.03	0.002682	0.302682			3441.03	-0.001483	0.598517		3441.03	-0.005013	0.894987			3441.03	-0.004855	1.19514
3440.07	0.002171		3440.07	0.002664	0.302664			3440.07	-0.001486	0.598514		3440.07	-0.005067	0.894933			3440.07	-0.004873	1.19513
3439.1	0.002168		3439.1	0.002682	0.302682			3439.1	-0.001481	0.598519		3439.1	-0.005073	0.894927			3439.1	-0.004865	1.19514
3438.14	0.002177		3438.14	0.002697	0.302697			3438.14	-0.001481	0.598519		3438.14	-0.005061	0.894939			3438.14	-0.004855	1.19514
3437.18	0.00221		3437.18	0.002725	0.302725			3437.18	-0.001459	0.598541		3437.18	-0.005081	0.894919			3437.18	-0.004877	1.19512
3436.21	0.002209		3436.21	0.002749	0.302749			3436.21	-0.001449	0.598551		3436.21	-0.005155	0.894845			3436.21	-0.004937	1.19506
3435.25	0.002141		3435.25	0.002737	0.302737			3435.25	-0.001478	0.598522		3435.25	-0.005221	0.894779			3435.25	-0.00498	1.19502
3434.28	0.002076		3434.28	0.002726	0.302726			3434.28	-0.001498	0.598502		3434.28	-0.005231	0.894769			3434.28	-0.004973	1.19503
3433.32	0.002068		3433.32	0.002752	0.302752			3433.32	-0.001488	0.598512		3433.32	-0.005183	0.894817			3433.32	-0.004928	1.19507
3432.36	0.002113		3432.36	0.002784	0.302784			3432.36	-0.001477	0.598523		3432.36	-0.005088	0.894912			3432.36	-0.004861	1.19514
3431.39	0.002163		3431.39	0.002773	0.302773			3431.39	-0.001481	0.598519		3431.39	-0.005007	0.894993			3431.39	-0.004803	1.1952
3430.43	0.002148		3430.43	0.002722	0.302722			3430.43	-0.001516	0.598484		3430.43	-0.005003	0.894997			3430.43	-0.004794	1.19521
3429.46	0.0021		3429.46	0.002702	0.302702			3429.46	-0.001555	0.598445		3429.46	-0.005049	0.894951			3429.46	-0.00484	1.19516
3428.5	0.0021		3428.5	0.002729	0.302729			3428.5	-0.001557	0.598443		3428.5	-0.005075	0.894925			3428.5	-0.004891	1.19511
3427.54	0.00213		3427.54	0.002742	0.302742			3427.54	-0.001534	0.598466		3427.54	-0.005072	0.894928			3427.54	-0.004912	1.19509
3426.57	0.002149		3426.57	0.002735	0.302735			3426.57	-0.001499	0.598501		3426.57	-0.005085	0.894915			3426.57	-0.004923	1.19508
3425.61	0.002168		3425.61	0.002748	0.302748			3425.61	-0.001453	0.598547		3425.61	-0.005105	0.894895			3425.61	-0.00492	1.19508
3424.64	0.00222		3424.64	0.00279	0.30279			3424.64	-0.001424	0.598576		3424.64	-0.005078	0.894922			3424.64	-0.004871	1.19513
3423.68	0.002313		3423.68	0.002855	0.302855			3423.68	-0.001414	0.598586		3423.68	-0.004985	0.895015			3423.68	-0.004772	1.19523
3422.71	0.002408		3422.71	0.002918	0.302918			3422.71	-0.001409	0.598591		3422.71	-0.004869	0.895131			3422.71	-0.004669	1.19533
3421.75	0.002461		3421.75	0.002938	0.302938			3421.75	-0.001429	0.598571		3421.75	-0.00478	0.89522			3421.75	-0.004608	1.19539
3420.79	0.002431		3420.79	0.002888	0.302888			3420.79	-0.001494	0.598506		3420.79	-0.004728	0.895272			3420.79	-0.004594	1.19541
3419.82	0.002288		3419.82	0.002781	0.302781			3419.82	-0.001561	0.598439		3419.82	-0.004753	0.895247			3419.82	-0.004636	1.19536
3418.86	0.00212		3418.86	0.002701	0.302701			3418.86	-0.001571	0.598429		3418.86	-0.004883	0.895117			3418.86	-0.004731	1.19527
3417.89	0.002041		3417.89	0.002697	0.302697			3417.89	-0.001547	0.598453		3417.89	-0.005012	0.894988			3417.89	-0.004806	1.19519
3416.93	0.002061		3416.93	0.002745	0.302745			3416.93	-0.001524	0.598476		3416.93	-0.005054	0.894946			3416.93	-0.004821	1.19518
3415.97	0.002122		3415.97	0.002808	0.302808			3415.97	-0.001495	0.598505		3415.97	-0.005052	0.894948			3415.97	-0.00481	1.19519
3415	0.002157		3415	0.002851	0.302851			3415	-0.001452	0.598548		3415	-0.005055	0.894945			3415	-0.004821	1.19518
3414.04	0.002144		3414.04	0.002856	0.302856			3414.04	-0.001419	0.598581		3414.04	-0.005068	0.894932			3414.04	-0.004868	1.19513
3413.07	0.002106		3413.07	0.002836	0.302836			3413.07	-0.00143	0.59857		3413.07	-0.005072	0.894928			3413.07	-0.004897	1.1951
3412.11	0.002071		3412.11	0.002831	0.302831			3412.11	-0.001468	0.598532		3412.11	-0.00505	0.89495			3412.11	-0.004874	1.19513
3411.14	0.002047		3411.14	0.002866	0.302866			3411.14	-0.001488	0.598512		3411.14	-0.00503	0.89497			3411.14	-0.004845	1.19515
3410.18	0.002034		3410.18	0.002907	0.302907			3410.18	-0.001482	0.598518		3410.18	-0.005037	0.894963			3410.18	-0.00483	1.19517
3409.22	0.002036		3409.22	0.002922	0.302922			3409.22	-0.001477	0.598523		3409.22	-0.005048	0.894952			3409.22	-0.00481	1.19519
3408.25	0.002059		3408.25	0.002923	0.302923			3408.25	-0.001468	0.598532		3408.25	-0.005038	0.894962			3408.25	-0.004798	1.1952
3407.29	0.002094		3407.29	0.002932	0.302932			3407.29	-0.001431	0.598569		3407.29	-0.00501	0.89499			3407.29	-0.00481	1.19519
3406.32	0.002115		3406.32	0.002948	0.302948			3406.32	-0.001387	0.598613		3406.32	-0.004993	0.895007			3406.32	-0.004832	1.19517
3405.36	0.002118		3405.36	0.002959	0.302959			3405.36	-0.001373	0.598627		3405.36	-0.004984	0.895016			3405.36	-0.004839	1.19516
3404.4	0.00211		3404.4	0.002962	0.302962			3404.4	-0.001382	0.598618		3404.4	-0.004955	0.895045			3404.4	-0.004811	1.19519
3403.43	0.002087		3403.43	0.002955	0.302955			3403.43	-0.001404	0.598596		3403.43	-0.004934	0.895066			3403.43	-0.00476	1.19524
3402.47	0.002081		3402.47	0.002959	0.302959			3402.47	-0.001422	0.598578		3402.47	-0.004933	0.895067			3402.47	-0.004717	1.19528
3401.5	0.002101		3401.5	0.002981	0.302981			3401.5	-0.001416	0.598584		3401.5	-0.004921	0.895079			3401.5	-0.004708	1.19529
3400.54	0.002104		3400.54	0.002993	0.302993			3400.54	-0.001391	0.598609		3400.54	-0.004927	0.895073			3400.54	-0.004746	1.19525
3399.57	0.002105		3399.57	0.002995	0.302995			3399.57	-0.001376	0.598624		3399.57	-0.004964	0.895036			3399.57	-0.004798	1.1952
3398.61	0.002143		3398.61	0.003016	0.303016			3398.61	-0.001395	0.598605		3398.61	-0.004968	0.895032			3398.61	-0.004795	1.1952
3397.65	0.002189		3397.65	0.003041	0.303041			3397.65	-0.001425	0.598575		3397.65	-0.004926	0.895074			3397.65	-0.004741	1.19526
3396.68	0.002158		3396.68	0.003001	0.303001			3396.68	-0.00145	0.59855		3396.68	-0.004931	0.895069			3396.68	-0.004733	1.19527
3395.72	0.002059		3395.72	0.002921	0.302921			3395.72	-0.001481	0.598519		3395.72	-0.004989	0.895011			3395.72	-0.004776	1.19522
3394.75	0.002029		3394.75	0.002921	0.302921			3394.75	-0.001474	0.598526		3394.75	-0.004989	0.895011			3394.75	-0.004785	1.19521
3393.79	0.002136		3393.79	0.003026	0.303026			3393.79	-0.001407	0.598593		3393.79	-0.004891	0.895109			3393.79	-0.00474	1.19526
3392.83	0.00226		3392.83	0.003122	0.303122			3392.83	-0.001351	0.598649		3392.83	-0.004811	0.895189			3392.83	-0.00471	1.19529
3391.86	0.002261		3391.86	0.003117	0.303117			3391.86	-0.001346	0.598654		3391.86	-0.004886	0.895114			3391.86	-0.00475	1.19525
3390.9	0.00218		3390.9	0.00307	0.30307			3390.9	-0.001369	0.598631		3390.9	-0.005001	0.894999			3390.9	-0.004785	1.19521
3389.93	0.002097		3389.93	0.003025	0.303025			3389.93	-0.001407	0.598593		3389.93	-0.004984	0.895016			3389.93	-0.004757	1.19524
3388.97	0.002034		3388.97	0.00298	0.30298			3388.97	-0.001437	0.598563		3388.97	-0.004909	0.895091			3388.97	-0.004736	1.19526
3388.01	0.002015		3388.01	0.002978	0.302978			3388.01	-0.001439	0.598561		3388.01	-0.00486	0.89514			3388.01	-0.004741	1.19526
3387.04	0.002042		3387.04	0.003039	0.303039			3387.04	-0.001431	0.598569		3387.04	-0.004805	0.895195			3387.04	-0.004727	1.19527
3386.08	0.0021		3386.08	0.003106	0.303106			3386.08	-0.001416	0.598584		3386.08	-0.004751	0.895249			3386.08	-0.004705	1.19529
3385.11	0.002158		3385.11	0.003138	0.303138			3385.11	-0.001393	0.598607		3385.11	-0.004751	0.895249			3385.11	-0.004701	1.1953
3384.15	0.002172		3384.15	0.003136	0.303136			3384.15	-0.001376	0.598624		3384.15	-0.004793	0.895207			3384.15	-0.004695	1.19531
3383.18	0.002139		3383.18	0.003123	0.303123			3383.18	-0.001356	0.598644		3383.18	-0.004822	0.895178			3383.18	-0.00468	1.19532
3382.22	0.002083		3382.22	0.003122	0.303122			3382.22	-0.001334	0.598666		3382.22	-0.004825	0.895175			3382.22	-0.00467	1.19533
3381.26	0.002047		3381.26	0.003138	0.303138			3381.26	-0.001321	0.598679		3381.26	-0.004832	0.895168			3381.26	-0.004666	1.19533
3380.29	0.002054		3380.29	0.00316	0.30316			3380.29	-0.001302	0.598698		3380.29	-0.004858	0.895142			3380.29	-0.004674	1.19533
3379.33	0.002061		3379.33	0.003165	0.303165			3379.33	-0.00129	0.59871		3379.33	-0.004876	0.895124			3379.33	-0.004685	1.19531
3378.36	0.002039		3378.36	0.003145	0.303145			3378.36	-0.001306	0.598694		3378.36	-0.004879	0.895121			3378.36	-0.004678	1.19532
3377.4	0.002025		3377.4	0.00314	0.30314			3377.4	-0.001324	0.598676		3377.4	-0.004883	0.895117			3377.4	-0.00469	1.19531
3376.44	0.002045		3376.44	0.003179	0.303179			3376.44	-0.001317	0.598683		3376.44	-0.004873	0.895127			3376.44	-0.00473	1.19527
3375.47	0.002078		3375.47	0.003228	0.303228			3375.47	-0.001303	0.598697		3375.47	-0.004835	0.895165			3375.47	-0.004727	1.19527
3374.51	0.002099		3374.51	0.003242	0.303242			3374.51	-0.001292	0.598708		3374.51	-0.004808	0.895192			3374.51	-0.004688	1.19531
3373.54	0.002085		3373.54	0.003214	0.303214			3373.54	-0.001288	0.598712		3373.54	-0.004826	0.895174			3373.54	-0.004675	1.19532
3372.58	0.00204		3372.58	0.003175	0.303175			3372.58	-0.001323	0.598677		3372.58	-0.004855	0.895145			3372.58	-0.004671	1.19533
3371.61	0.002003		3371.61	0.003166	0.303166			3371.61	-0.001391	0.598609		3371.61	-0.004839	0.895161			3371.61	-0.00462	1.19538
3370.65	0.002005		3370.65	0.003194	0.303194			3370.65	-0.001435	0.598565		3370.65	-0.004798	0.895202			3370.65	-0.004541	1.19546
3369.69	0.002037		3369.69	0.003242	0.303242			3369.69	-0.001419	0.598581		3369.69	-0.004781	0.895219			3369.69	-0.004515	1.19548
3368.72	0.002082		3368.72	0.003297	0.303297			3368.72	-0.001349	0.598651		3368.72	-0.004776	0.895224			3368.72	-0.004572	1.19543
3367.76	0.002136		3367.76	0.003348	0.303348			3367.76	-0.001273	0.598727		3367.76	-0.004761	0.895239			3367.76	-0.004653	1.19535
3366.79	0.002194		3366.79	0.003393	0.303393			3366.79	-0.001257	0.598743		3366.79	-0.004742	0.895258			3366.79	-0.004688	1.19531
3365.83	0.00225		3365.83	0.003432	0.303432			3365.83	-0.001277	0.598723		3365.83	-0.004734	0.895266			3365.83	-0.004679	1.19532
3364.87	0.002277		3364.87	0.00343	0.30343			3364.87	-0.001273	0.598727		3364.87	-0.004756	0.895244			3364.87	-0.004659	1.19534
3363.9	0.002263		3363.9	0.003414	0.303414			3363.9	-0.001256	0.598744		3363.9	-0.004785	0.895215			3363.9	-0.004625	1.19537
3362.94	0.002248		3362.94	0.003446	0.303446			3362.94	-0.001247	0.598753		3362.94	-0.004772	0.895228			3362.94	-0.004562	1.19544
3361.97	0.002252		3361.97	0.003482	0.303482			3361.97	-0.001228	0.598772		3361.97	-0.004735	0.895265			3361.97	-0.004488	1.19551
3361.01	0.002232		3361.01	0.003458	0.303458			3361.01	-0.001217	0.598783		3361.01	-0.004717	0.895283			3361.01	-0.004435	1.19556
3360.05	0.002173		3360.05	0.003403	0.303403			3360.05	-0.001241	0.598759		3360.05	-0.004723	0.895277			3360.05	-0.004433	1.19557
3359.08	0.002102		3359.08	0.003362	0.303362			3359.08	-0.001282	0.598718		3359.08	-0.004736	0.895264			3359.08	-0.004476	1.19552
3358.12	0.002057		3358.12	0.003352	0.303352			3358.12	-0.001308	0.598692		3358.12	-0.004728	0.895272			3358.12	-0.004507	1.19549
3357.15	0.002079		3357.15	0.00339	0.30339			3357.15	-0.001295	0.598705		3357.15	-0.004701	0.895299			3357.15	-0.004505	1.19549
3356.19	0.002141		3356.19	0.003453	0.303453			3356.19	-0.001248	0.598752		3356.19	-0.004688	0.895312			3356.19	-0.00451	1.19549
3355.22	0.002164		3355.22	0.003488	0.303488			3355.22	-0.001214	0.598786		3355.22	-0.004704	0.895296			3355.22	-0.004534	1.19547
3354.26	0.002137		3354.26	0.003479	0.303479			3354.26	-0.001209	0.598791		3354.26	-0.004745	0.895255			3354.26	-0.004567	1.19543
3353.3	0.002092		3353.3	0.00345	0.30345			3353.3	-0.001223	0.598777		3353.3	-0.004789	0.895211			3353.3	-0.004602	1.1954
3352.33	0.00202		3352.33	0.003406	0.303406			3352.33	-0.001275	0.598725		3352.33	-0.004807	0.895193			3352.33	-0.004622	1.19538
3351.37	0.001963		3351.37	0.003369	0.303369			3351.37	-0.001326	0.598674		3351.37	-0.004828	0.895172			3351.37	-0.004634	1.19537
3350.4	0.001974		3350.4	0.003395	0.303395			3350.4	-0.001311	0.598689		3350.4	-0.004861	0.895139			3350.4	-0.004662	1.19534
3349.44	0.002008		3349.44	0.003457	0.303457			3349.44	-0.001265	0.598735		3349.44	-0.004862	0.895138			3349.44	-0.004672	1.19533
3348.48	0.002024		3348.48	0.003488	0.303488			3348.48	-0.001244	0.598756		3348.48	-0.004845	0.895155			3348.48	-0.004646	1.19535
3347.51	0.002025		3347.51	0.00349	0.30349			3347.51	-0.001246	0.598754		3347.51	-0.004878	0.895122			3347.51	-0.004621	1.19538
3346.55	0.002002		3346.55	0.003485	0.303485			3346.55	-0.001264	0.598736		3346.55	-0.004931	0.895069			3346.55	-0.004615	1.19538
3345.58	0.001956		3345.58	0.003488	0.303488			3345.58	-0.001298	0.598702		3345.58	-0.004933	0.895067			3345.58	-0.004609	1.19539
3344.62	0.001918		3344.62	0.003497	0.303497			3344.62	-0.001318	0.598682		3344.62	-0.00491	0.89509			3344.62	-0.004611	1.19539
3343.65	0.001911		3343.65	0.003489	0.303489			3343.65	-0.001315	0.598685		3343.65	-0.004898	0.895102			3343.65	-0.00463	1.19537
3342.69	0.00193		3342.69	0.003478	0.303478			3342.69	-0.001309	0.598691		3342.69	-0.004872	0.895128			3342.69	-0.004623	1.19538
3341.73	0.001965		3341.73	0.003495	0.303495			3341.73	-0.0013	0.5987		3341.73	-0.004843	0.895157			3341.73	-0.004589	1.19541
3340.76	0.002008		3340.76	0.00353	0.30353			3340.76	-0.001278	0.598722		3340.76	-0.004867	0.895133			3340.76	-0.004607	1.19539
3339.8	0.002019		3339.8	0.003528	0.303528			3339.8	-0.001266	0.598734		3339.8	-0.004927	0.895073			3339.8	-0.00468	1.19532
3338.83	0.002001		3338.83	0.003493	0.303493			3338.83	-0.001271	0.598729		3338.83	-0.004957	0.895043			3338.83	-0.004715	1.19528
3337.87	0.00203		3337.87	0.003499	0.303499			3337.87	-0.001245	0.598755		3337.87	-0.004926	0.895074			3337.87	-0.004671	1.19533
3336.91	0.002065		3336.91	0.003545	0.303545			3336.91	-0.001201	0.598799		3336.91	-0.004863	0.895137			3336.91	-0.004603	1.1954
3335.94	0.002026		3335.94	0.003575	0.303575			3335.94	-0.001197	0.598803		3335.94	-0.004827	0.895173			3335.94	-0.004591	1.19541
3334.98	0.001972		3334.98	0.00358	0.30358			3334.98	-0.001232	0.598768		3334.98	-0.004829	0.895171			3334.98	-0.004646	1.19535
3334.01	0.001947		3334.01	0.003572	0.303572			3334.01	-0.001276	0.598724		3334.01	-0.00485	0.89515			3334.01	-0.004706	1.19529
3333.05	0.001927		3333.05	0.003586	0.303586			3333.05	-0.001306	0.598694		3333.05	-0.004884	0.895116			3333.05	-0.004732	1.19527
3332.08	0.001925		3332.08	0.003639	0.303639			3332.08	-0.001296	0.598704		3332.08	-0.004904	0.895096			3332.08	-0.004723	1.19528
3331.12	0.001931		3331.12	0.003673	0.303673			3331.12	-0.001278	0.598722		3331.12	-0.004905	0.895095			3331.12	-0.004721	1.19528
3330.16	0.00191		3330.16	0.00366	0.30366			3330.16	-0.001295	0.598705		3330.16	-0.004917	0.895083			3330.16	-0.004743	1.19526
3329.19	0.001872		3329.19	0.003638	0.303638			3329.19	-0.001337	0.598663		3329.19	-0.004926	0.895074			3329.19	-0.004757	1.19524
3328.23	0.001861		3328.23	0.003626	0.303626			3328.23	-0.001372	0.598628		3328.23	-0.004908	0.895092			3328.23	-0.004743	1.19526
3327.26	0.001884		3327.26	0.00361	0.30361			3327.26	-0.001393	0.598607		3327.26	-0.00488	0.89512			3327.26	-0.004703	1.1953
3326.3	0.001892		3326.3	0.003571	0.303571			3326.3	-0.001396	0.598604		3326.3	-0.004895	0.895105			3326.3	-0.004671	1.19533
3325.34	0.001873		3325.34	0.00354	0.30354			3325.34	-0.001374	0.598626		3325.34	-0.00498	0.89502			3325.34	-0.004701	1.1953
3324.37	0.001857		3324.37	0.003553	0.303553			3324.37	-0.001352	0.598648		3324.37	-0.005079	0.894921			3324.37	-0.004784	1.19522
3323.41	0.00185		3323.41	0.003593	0.303593			3323.41	-0.00135	0.59865		3323.41	-0.00512	0.89488			3323.41	-0.00485	1.19515
3322.44	0.001855		3322.44	0.003637	0.303637			3322.44	-0.00135	0.59865		3322.44	-0.005094	0.894906			3322.44	-0.004852	1.19515
3321.48	0.001871		3321.48	0.003668	0.303668			3321.48	-0.001351	0.598649		3321.48	-0.005043	0.894957			3321.48	-0.004804	1.1952
3320.52	0.001858		3320.52	0.00366	0.30366			3320.52	-0.001367	0.598633		3320.52	-0.004995	0.895005			3320.52	-0.004753	1.19525
3319.55	0.001825		3319.55	0.003645	0.303645			3319.55	-0.001362	0.598638		3319.55	-0.004964	0.895036			3319.55	-0.004719	1.19528
3318.59	0.001837		3318.59	0.00366	0.30366			3318.59	-0.001316	0.598684		3318.59	-0.004956	0.895044			3318.59	-0.004695	1.19531
3317.62	0.001865		3317.62	0.003675	0.303675			3317.62	-0.001301	0.598699		3317.62	-0.004978	0.895022			3317.62	-0.004703	1.1953
3316.66	0.001855		3316.66	0.003678	0.303678			3316.66	-0.00135	0.59865		3316.66	-0.005026	0.894974			3316.66	-0.004754	1.19525
3315.69	0.001841		3315.69	0.00369	0.30369			3315.69	-0.001394	0.598606		3315.69	-0.005059	0.894941			3315.69	-0.0048	1.1952
3314.73	0.001876		3314.73	0.003711	0.303711			3314.73	-0.001388	0.598612		3314.73	-0.00505	0.89495			3314.73	-0.004801	1.1952
3313.77	0.001939		3313.77	0.003748	0.303748			3313.77	-0.001372	0.598628		3313.77	-0.005011	0.894989			3313.77	-0.004777	1.19522
3312.8	0.001951		3312.8	0.003789	0.303789			3312.8	-0.00136	0.59864		3312.8	-0.004979	0.895021			3312.8	-0.004782	1.19522
3311.84	0.001913		3311.84	0.003813	0.303813			3311.84	-0.001344	0.598656		3311.84	-0.004968	0.895032			3311.84	-0.004803	1.1952
3310.87	0.001908		3310.87	0.003816	0.303816			3310.87	-0.00135	0.59865		3310.87	-0.004948	0.895052			3310.87	-0.004784	1.19522
3309.91	0.001947		3309.91	0.003807	0.303807			3309.91	-0.001385	0.598615		3309.91	-0.004906	0.895094			3309.91	-0.004753	1.19525
3308.95	0.001975		3308.95	0.003796	0.303796			3308.95	-0.001413	0.598587		3308.95	-0.004873	0.895127			3308.95	-0.004754	1.19525
3307.98	0.001935		3307.98	0.003756	0.303756			3307.98	-0.001424	0.598576		3307.98	-0.004899	0.895101			3307.98	-0.004781	1.19522
3307.02	0.001857		3307.02	0.003706	0.303706			3307.02	-0.001421	0.598579		3307.02	-0.004976	0.895024			3307.02	-0.004809	1.19519
3306.05	0.00181		3306.05	0.003695	0.303695			3306.05	-0.001403	0.598597		3306.05	-0.005033	0.894967			3306.05	-0.004828	1.19517
3305.09	0.001775		3305.09	0.003694	0.303694			3305.09	-0.00139	0.59861		3305.09	-0.005057	0.894943			3305.09	-0.004844	1.19516
3304.12	0.001729		3304.12	0.003669	0.303669			3304.12	-0.00139	0.59861		3304.12	-0.00508	0.89492			3304.12	-0.004848	1.19515
3303.16	0.001693		3303.16	0.003644	0.303644			3303.16	-0.00141	0.59859		3303.16	-0.005089	0.894911			3303.16	-0.00483	1.19517
3302.2	0.001678		3302.2	0.003654	0.303654			3302.2	-0.001436	0.598564		3302.2	-0.005064	0.894936			3302.2	-0.004815	1.19518
3301.23	0.001684		3301.23	0.003683	0.303683			3301.23	-0.001446	0.598554		3301.23	-0.005028	0.894972			3301.23	-0.00482	1.19518
3300.27	0.00169		3300.27	0.003696	0.303696			3300.27	-0.001456	0.598544		3300.27	-0.005001	0.894999			3300.27	-0.004824	1.19518
3299.3	0.001701		3299.3	0.003711	0.303711			3299.3	-0.001457	0.598543		3299.3	-0.004966	0.895034			3299.3	-0.004793	1.19521
3298.34	0.001726		3298.34	0.003733	0.303733			3298.34	-0.001436	0.598564		3298.34	-0.004917	0.895083			3298.34	-0.004748	1.19525
3297.38	0.001717		3297.38	0.00372	0.30372			3297.38	-0.001443	0.598557		3297.38	-0.004919	0.895081			3297.38	-0.004749	1.19525
3296.41	0.001653		3296.41	0.003679	0.303679			3296.41	-0.001486	0.598514		3296.41	-0.005007	0.894993			3296.41	-0.004796	1.1952
3295.45	0.001594		3295.45	0.003649	0.303649			3295.45	-0.001511	0.598489		3295.45	-0.005076	0.894924			3295.45	-0.004812	1.19519
3294.48	0.001591		3294.48	0.003657	0.303657			3294.48	-0.001493	0.598507		3294.48	-0.005041	0.894959			3294.48	-0.004768	1.19523
3293.52	0.001656		3293.52	0.00372	0.30372			3293.52	-0.001442	0.598558		3293.52	-0.004958	0.895042			3293.52	-0.00472	1.19528
3292.55	0.001756		3292.55	0.0038	0.3038			3292.55	-0.001393	0.598607		3292.55	-0.004907	0.895093			3292.55	-0.004721	1.19528
3291.59	0.001804		3291.59	0.003842	0.303842			3291.59	-0.00138	0.59862		3291.59	-0.004919	0.895081			3291.59	-0.004767	1.19523
3290.63	0.001763		3290.63	0.003826	0.303826			3290.63	-0.00141	0.59859		3290.63	-0.004965	0.895035			3290.63	-0.004795	1.1952
3289.66	0.001728		3289.66	0.003788	0.303788			3289.66	-0.001459	0.598541		3289.66	-0.004971	0.895029			3289.66	-0.004767	1.19523
3288.7	0.001732		3288.7	0.003759	0.303759			3288.7	-0.001489	0.598511		3288.7	-0.004942	0.895058			3288.7	-0.004738	1.19526
3287.73	0.001696		3287.73	0.003722	0.303722			3287.73	-0.001479	0.598521		3287.73	-0.004954	0.895046			3287.73	-0.004753	1.19525
3286.77	0.001647		3286.77	0.003676	0.303676			3286.77	-0.001459	0.598541		3286.77	-0.004992	0.895008			3286.77	-0.004778	1.19522
3285.81	0.001661		3285.81	0.003641	0.303641			3285.81	-0.001469	0.598531		3285.81	-0.004999	0.895001			3285.81	-0.004778	1.19522
3284.84	0.001681		3284.84	0.003625	0.303625			3284.84	-0.001503	0.598497		3284.84	-0.004976	0.895024			3284.84	-0.00476	1.19524
3283.88	0.001657		3283.88	0.003627	0.303627			3283.88	-0.001532	0.598468		3283.88	-0.004929	0.895071			3283.88	-0.004729	1.19527
3282.91	0.001619		3282.91	0.003652	0.303652			3282.91	-0.001518	0.598482		3282.91	-0.004883	0.895117			3282.91	-0.004703	1.1953
3281.95	0.001609		3281.95	0.003691	0.303691			3281.95	-0.001465	0.598535		3281.95	-0.004882	0.895118			3281.95	-0.0047	1.1953
3280.99	0.001631		3280.99	0.003695	0.303695			3280.99	-0.001432	0.598568		3280.99	-0.004899	0.895101			3280.99	-0.004703	1.1953
3280.02	0.00165		3280.02	0.003654	0.303654			3280.02	-0.001442	0.598558		3280.02	-0.004901	0.895099			3280.02	-0.004701	1.1953
3279.06	0.001636		3279.06	0.003617	0.303617			3279.06	-0.00146	0.59854		3279.06	-0.004918	0.895082			3279.06	-0.004703	1.1953
3278.09	0.001657		3278.09	0.003641	0.303641			3278.09	-0.001447	0.598553		3278.09	-0.004919	0.895081			3278.09	-0.004685	1.19531
3277.13	0.001759		3277.13	0.003715	0.303715			3277.13	-0.001398	0.598602		3277.13	-0.004852	0.895148			3277.13	-0.004631	1.19537
3276.16	0.001819		3276.16	0.003718	0.303718			3276.16	-0.001391	0.598609		3276.16	-0.004795	0.895205			3276.16	-0.004617	1.19538
3275.2	0.001792		3275.2	0.003627	0.303627			3275.2	-0.001455	0.598545		3275.2	-0.004802	0.895198			3275.2	-0.004666	1.19533
3274.24	0.001798		3274.24	0.00357	0.30357			3274.24	-0.001502	0.598498		3274.24	-0.004795	0.895205			3274.24	-0.004681	1.19532
3273.27	0.001791		3273.27	0.003553	0.303553			3273.27	-0.001506	0.598494		3273.27	-0.004797	0.895203			3273.27	-0.00467	1.19533
3272.31	0.001697		3272.31	0.00351	0.30351			3272.31	-0.001508	0.598492		3272.31	-0.004869	0.895131			3272.31	-0.004704	1.1953
3271.34	0.001618		3271.34	0.003455	0.303455			3271.34	-0.001513	0.598487		3271.34	-0.004919	0.895081			3271.34	-0.004736	1.19526
3270.38	0.00158		3270.38	0.003397	0.303397			3270.38	-0.001519	0.598481		3270.38	-0.004893	0.895107			3270.38	-0.004724	1.19528
3269.42	0.001518		3269.42	0.003341	0.303341			3269.42	-0.001537	0.598463		3269.42	-0.004868	0.895132			3269.42	-0.004703	1.1953
3268.45	0.001441		3268.45	0.003293	0.303293			3268.45	-0.001562	0.598438		3268.45	-0.004889	0.895111			3268.45	-0.004715	1.19528
3267.49	0.001405		3267.49	0.003272	0.303272			3267.49	-0.001564	0.598436		3267.49	-0.004937	0.895063			3267.49	-0.004762	1.19524
3266.52	0.001436		3266.52	0.003317	0.303317			3266.52	-0.001537	0.598463		3266.52	-0.004952	0.895048			3266.52	-0.004773	1.19523
3265.56	0.001497		3265.56	0.003399	0.303399			3265.56	-0.001505	0.598495		3265.56	-0.004913	0.895087			3265.56	-0.004719	1.19528
3264.59	0.001526		3264.59	0.003424	0.303424			3264.59	-0.001493	0.598507		3264.59	-0.004881	0.895119			3264.59	-0.004663	1.19534
3263.63	0.001491		3263.63	0.003358	0.303358			3263.63	-0.001513	0.598487		3263.63	-0.004867	0.895133			3263.63	-0.004637	1.19536
3262.67	0.001436		3262.67	0.003286	0.303286			3262.67	-0.001548	0.598452		3262.67	-0.004827	0.895173			3262.67	-0.004611	1.19539
3261.7	0.001422		3261.7	0.003278	0.303278			3261.7	-0.001584	0.598416		3261.7	-0.004768	0.895232			3261.7	-0.004583	1.19542
3260.74	0.001439		3260.74	0.003273	0.303273			3260.74	-0.001635	0.598365		3260.74	-0.00475	0.89525			3260.74	-0.00459	1.19541
3259.77	0.001427		3259.77	0.003203	0.303203			3259.77	-0.001678	0.598322		3259.77	-0.004806	0.895194			3259.77	-0.004642	1.19536
3258.81	0.001389		3258.81	0.003135	0.303135			3258.81	-0.001657	0.598343		3258.81	-0.004877	0.895123			3258.81	-0.004681	1.19532
3257.85	0.001393		3257.85	0.00315	0.30315			3257.85	-0.001579	0.598421		3257.85	-0.004887	0.895113			3257.85	-0.004663	1.19534
3256.88	0.001414		3256.88	0.003189	0.303189			3256.88	-0.001541	0.598459		3256.88	-0.004865	0.895135			3256.88	-0.00464	1.19536
3255.92	0.001429		3255.92	0.003177	0.303177			3255.92	-0.001569	0.598431		3255.92	-0.004865	0.895135			3255.92	-0.00466	1.19534
3254.95	0.001489		3254.95	0.003152	0.303152			3254.95	-0.001603	0.598397		3254.95	-0.004847	0.895153			3254.95	-0.004674	1.19533
3253.99	0.001542		3253.99	0.003125	0.303125			3253.99	-0.001636	0.598364		3253.99	-0.004824	0.895176			3253.99	-0.004668	1.19533
3253.02	0.001502		3253.02	0.003071	0.303071			3253.02	-0.001667	0.598333		3253.02	-0.004866	0.895134			3253.02	-0.004695	1.19531
3252.06	0.001435		3252.06	0.003021	0.303021			3252.06	-0.001669	0.598331		3252.06	-0.004927	0.895073			3252.06	-0.004744	1.19526
3251.1	0.001387		3251.1	0.002979	0.302979			3251.1	-0.001667	0.598333		3251.1	-0.004935	0.895065			3251.1	-0.004765	1.19524
3250.13	0.001339		3250.13	0.002927	0.302927			3250.13	-0.001683	0.598317		3250.13	-0.004915	0.895085			3250.13	-0.004766	1.19523
3249.17	0.001299		3249.17	0.002879	0.302879			3249.17	-0.001699	0.598301		3249.17	-0.004906	0.895094			3249.17	-0.004789	1.19521
3248.2	0.001275		3248.2	0.002841	0.302841			3248.2	-0.001707	0.598293		3248.2	-0.004906	0.895094			3248.2	-0.004823	1.19518
3247.24	0.001285		3247.24	0.002836	0.302836			3247.24	-0.00171	0.59829		3247.24	-0.004918	0.895082			3247.24	-0.004829	1.19517
3246.28	0.001396		3246.28	0.002898	0.302898			3246.28	-0.001683	0.598317		3246.28	-0.004913	0.895087			3246.28	-0.004788	1.19521
3245.31	0.001565		3245.31	0.002963	0.302963			3245.31	-0.001633	0.598367		3245.31	-0.004862	0.895138			3245.31	-0.004729	1.19527
3244.35	0.001597		3244.35	0.002928	0.302928			3244.35	-0.001631	0.598369		3244.35	-0.004845	0.895155			3244.35	-0.004714	1.19529
3243.38	0.001472		3243.38	0.002837	0.302837			3243.38	-0.001681	0.598319		3243.38	-0.0049	0.8951			3243.38	-0.004723	1.19528
3242.42	0.001354		3242.42	0.002786	0.302786			3242.42	-0.001705	0.598295		3242.42	-0.00494	0.89506			3242.42	-0.004718	1.19528
3241.46	0.001289		3241.46	0.002762	0.302762			3241.46	-0.001698	0.598302		3241.46	-0.004965	0.895035			3241.46	-0.004739	1.19526
3240.49	0.001259		3240.49	0.002735	0.302735			3240.49	-0.001687	0.598313		3240.49	-0.005009	0.894991			3240.49	-0.004784	1.19522
3239.53	0.00126		3239.53	0.002702	0.302702			3239.53	-0.001675	0.598325		3239.53	-0.005043	0.894957			3239.53	-0.004821	1.19518
3238.56	0.001283		3238.56	0.002674	0.302674			3238.56	-0.001672	0.598328		3238.56	-0.005038	0.894962			3238.56	-0.004846	1.19515
3237.6	0.001329		3237.6	0.002692	0.302692			3237.6	-0.001675	0.598325		3237.6	-0.005005	0.894995			3237.6	-0.004843	1.19516
3236.63	0.001347		3236.63	0.002728	0.302728			3236.63	-0.001682	0.598318		3236.63	-0.005009	0.894991			3236.63	-0.004855	1.19514
3235.67	0.001302		3235.67	0.002714	0.302714			3235.67	-0.001708	0.598292		3235.67	-0.005066	0.894934			3235.67	-0.00492	1.19508
3234.71	0.001274		3234.71	0.002659	0.302659			3234.71	-0.001738	0.598262		3234.71	-0.005069	0.894931			3234.71	-0.004949	1.19505
3233.74	0.001304		3233.74	0.002618	0.302618			3233.74	-0.001755	0.598245		3233.74	-0.004988	0.895012			3233.74	-0.004886	1.19511
3232.78	0.001333		3232.78	0.002614	0.302614			3232.78	-0.001763	0.598237		3232.78	-0.004934	0.895066			3232.78	-0.004831	1.19517
3231.81	0.001324		3231.81	0.002627	0.302627			3231.81	-0.001769	0.598231		3231.81	-0.004956	0.895044			3231.81	-0.004838	1.19516
3230.85	0.001331		3230.85	0.002632	0.302632			3230.85	-0.00178	0.59822		3230.85	-0.004968	0.895032			3230.85	-0.004832	1.19517
3229.89	0.001348		3229.89	0.002614	0.302614			3229.89	-0.001796	0.598204		3229.89	-0.004952	0.895048			3229.89	-0.004802	1.1952
3228.92	0.001338		3228.92	0.002609	0.302609			3228.92	-0.001797	0.598203		3228.92	-0.00495	0.89505			3228.92	-0.004809	1.19519
3227.96	0.00133		3227.96	0.002641	0.302641			3227.96	-0.001777	0.598223		3227.96	-0.004938	0.895062			3227.96	-0.00485	1.19515
3226.99	0.001299		3226.99	0.002627	0.302627			3226.99	-0.001779	0.598221		3226.99	-0.004937	0.895063			3226.99	-0.004898	1.1951
3226.03	0.001232		3226.03	0.002555	0.302555			3226.03	-0.001791	0.598209		3226.03	-0.004994	0.895006			3226.03	-0.004928	1.19507
3225.06	0.001201		3225.06	0.002528	0.302528			3225.06	-0.00176	0.59824		3225.06	-0.005056	0.894944			3225.06	-0.004926	1.19507
3224.1	0.001217		3224.1	0.002547	0.302547			3224.1	-0.001713	0.598287		3224.1	-0.00506	0.89494			3224.1	-0.004898	1.1951
3223.14	0.00123		3223.14	0.002545	0.302545			3223.14	-0.001701	0.598299		3223.14	-0.005034	0.894966			3223.14	-0.004854	1.19515
3222.17	0.001226		3222.17	0.002515	0.302515			3222.17	-0.001718	0.598282		3222.17	-0.005036	0.894964			3222.17	-0.004836	1.19516
3221.21	0.00127		3221.21	0.002493	0.302493			3221.21	-0.001732	0.598268		3221.21	-0.005043	0.894957			3221.21	-0.004851	1.19515
3220.24	0.001376		3220.24	0.002488	0.302488			3220.24	-0.001736	0.598264		3220.24	-0.005	0.895			3220.24	-0.004856	1.19514
3219.28	0.001398		3219.28	0.002455	0.302455			3219.28	-0.001765	0.598235		3219.28	-0.004971	0.895029			3219.28	-0.004879	1.19512
3218.32	0.001265		3218.32	0.002393	0.302393			3218.32	-0.00182	0.59818		3218.32	-0.005025	0.894975			3218.32	-0.004956	1.19504
3217.35	0.001142		3217.35	0.002366	0.302366			3217.35	-0.001837	0.598163		3217.35	-0.005083	0.894917			3217.35	-0.005021	1.19498
3216.39	0.001125		3216.39	0.002376	0.302376			3216.39	-0.001816	0.598184		3216.39	-0.00509	0.89491			3216.39	-0.00504	1.19496
3215.42	0.001187		3215.42	0.002416	0.302416			3215.42	-0.001782	0.598218		3215.42	-0.005074	0.894926			3215.42	-0.005014	1.19499
3214.46	0.001282		3214.46	0.002471	0.302471			3214.46	-0.001741	0.598259		3214.46	-0.005035	0.894965			3214.46	-0.004945	1.19505
3213.5	0.001285		3213.5	0.002436	0.302436			3213.5	-0.001751	0.598249		3213.5	-0.005013	0.894987			3213.5	-0.004923	1.19508
3212.53	0.001192		3212.53	0.002341	0.302341			3212.53	-0.001795	0.598205		3212.53	-0.005065	0.894935			3212.53	-0.004977	1.19502
3211.57	0.001153		3211.57	0.002322	0.302322			3211.57	-0.001799	0.598201		3211.57	-0.005128	0.894872			3211.57	-0.005002	1.195
3210.6	0.001215		3210.6	0.002359	0.302359			3210.6	-0.001804	0.598196		3210.6	-0.00512	0.89488			3210.6	-0.004958	1.19504
3209.64	0.001265		3209.64	0.002339	0.302339			3209.64	-0.001861	0.598139		3209.64	-0.005094	0.894906			3209.64	-0.004925	1.19507
3208.67	0.001189		3208.67	0.002239	0.302239			3208.67	-0.001922	0.598078		3208.67	-0.005134	0.894866			3208.67	-0.004972	1.19503
3207.71	0.001055		3207.71	0.002145	0.302145			3207.71	-0.001936	0.598064		3207.71	-0.005204	0.894796			3207.71	-0.005053	1.19495
3206.75	0.000986		3206.75	0.002109	0.302109			3206.75	-0.001922	0.598078		3206.75	-0.005237	0.894763			3206.75	-0.005098	1.1949
3205.78	0.000985		3205.78	0.002115	0.302115			3205.78	-0.001913	0.598087		3205.78	-0.005233	0.894767			3205.78	-0.005115	1.19488
3204.82	0.000991		3204.82	0.002153	0.302153			3204.82	-0.001911	0.598089		3204.82	-0.005233	0.894767			3204.82	-0.005129	1.19487
3203.85	0.000988		3203.85	0.002197	0.302197			3203.85	-0.0019	0.5981		3203.85	-0.005234	0.894766			3203.85	-0.005127	1.19487
3202.89	0.000978		3202.89	0.002182	0.302182			3202.89	-0.001901	0.598099		3202.89	-0.005203	0.894797			3202.89	-0.005107	1.19489
3201.93	0.000954		3201.93	0.002117	0.302117			3201.93	-0.001939	0.598061		3201.93	-0.005176	0.894824			3201.93	-0.00509	1.19491
3200.96	0.000947		3200.96	0.002083	0.302083			3200.96	-0.001974	0.598026		3200.96	-0.005191	0.894809			3200.96	-0.00508	1.19492
3200	0.000982		3200	0.002107	0.302107			3200	-0.001981	0.598019		3200	-0.005214	0.894786			3200	-0.005076	1.19492
3199.03	0.001048		3199.03	0.002151	0.302151			3199.03	-0.001959	0.598041		3199.03	-0.00519	0.89481			3199.03	-0.005069	1.19493
3198.07	0.001105		3198.07	0.002169	0.302169			3198.07	-0.001912	0.598088		3198.07	-0.005134	0.894866			3198.07	-0.005059	1.19494
3197.1	0.001094		3197.1	0.002134	0.302134			3197.1	-0.001883	0.598117		3197.1	-0.005148	0.894852			3197.1	-0.005096	1.1949
3196.14	0.001026		3196.14	0.00207	0.30207			3196.14	-0.001891	0.598109		3196.14	-0.005223	0.894777			3196.14	-0.005163	1.19484
3195.18	0.000957		3195.18	0.002006	0.302006			3195.18	-0.001914	0.598086		3195.18	-0.005252	0.894748			3195.18	-0.005192	1.19481
3194.21	0.000921		3194.21	0.001969	0.301969			3194.21	-0.001948	0.598052		3194.21	-0.005247	0.894753			3194.21	-0.005199	1.1948
3193.25	0.000907		3193.25	0.001988	0.301988			3193.25	-0.001978	0.598022		3193.25	-0.005274	0.894726			3193.25	-0.005206	1.19479
3192.28	0.000891		3192.28	0.002022	0.302022			3192.28	-0.001984	0.598016		3192.28	-0.005328	0.894672			3192.28	-0.005196	1.1948
3191.32	0.000883		3191.32	0.001992	0.301992			3191.32	-0.001994	0.598006		3191.32	-0.005384	0.894616			3191.32	-0.005194	1.19481
3190.36	0.000872		3190.36	0.001902	0.301902			3190.36	-0.00205	0.59795		3190.36	-0.005407	0.894593			3190.36	-0.005214	1.19479
3189.39	0.000835		3189.39	0.001832	0.301832			3189.39	-0.002113	0.597887		3189.39	-0.005377	0.894623			3189.39	-0.005227	1.19477
3188.43	0.000811		3188.43	0.001827	0.301827			3188.43	-0.002116	0.597884		3188.43	-0.005335	0.894665			3188.43	-0.005221	1.19478
3187.46	0.000818		3187.46	0.001846	0.301846			3187.46	-0.002079	0.597921		3187.46	-0.005317	0.894683			3187.46	-0.005216	1.19478
3186.5	0.000858		3186.5	0.001877	0.301877			3186.5	-0.002037	0.597963		3186.5	-0.005288	0.894712			3186.5	-0.005213	1.19479
3185.53	0.000938		3185.53	0.001931	0.301931			3185.53	-0.00199	0.59801		3185.53	-0.005252	0.894748			3185.53	-0.005208	1.19479
3184.57	0.00097		3184.57	0.001938	0.301938			3184.57	-0.001976	0.598024		3184.57	-0.005278	0.894722			3184.57	-0.005226	1.19477
3183.61	0.00089		3183.61	0.00186	0.30186			3183.61	-0.00202	0.59798		3183.61	-0.00536	0.89464			3183.61	-0.005268	1.19473
3182.64	0.000793		3182.64	0.001767	0.301767			3182.64	-0.00208	0.59792		3182.64	-0.005425	0.894575			3182.64	-0.005296	1.1947
3181.68	0.000755		3181.68	0.001727	0.301727			3181.68	-0.002113	0.597887		3181.68	-0.005462	0.894538			3181.68	-0.005313	1.19469
3180.71	0.000771		3180.71	0.001728	0.301728			3180.71	-0.002114	0.597886		3180.71	-0.005475	0.894525			3180.71	-0.005335	1.19466
3179.75	0.000843		3179.75	0.001761	0.301761			3179.75	-0.002078	0.597922		3179.75	-0.005434	0.894566			3179.75	-0.005318	1.19468
3178.79	0.00096		3178.79	0.001818	0.301818			3178.79	-0.002019	0.597981		3178.79	-0.005326	0.894674			3178.79	-0.005252	1.19475
3177.82	0.001		3177.82	0.001811	0.301811			3177.82	-0.002002	0.597998		3177.82	-0.005247	0.894753			3177.82	-0.005217	1.19478
3176.86	0.000899		3176.86	0.001717	0.301717			3176.86	-0.002045	0.597955		3176.86	-0.005288	0.894712			3176.86	-0.005251	1.19475
3175.89	0.000794		3175.89	0.001652	0.301652			3175.89	-0.002085	0.597915		3175.89	-0.005362	0.894638			3175.89	-0.005283	1.19472
3174.93	0.000771		3174.93	0.001649	0.301649			3174.93	-0.002088	0.597912		3174.93	-0.005394	0.894606			3174.93	-0.005285	1.19471
3173.97	0.000768		3173.97	0.001655	0.301655			3173.97	-0.00207	0.59793		3173.97	-0.005417	0.894583			3173.97	-0.005304	1.1947
3173	0.00073		3173	0.001633	0.301633			3173	-0.002068	0.597932		3173	-0.005431	0.894569			3173	-0.005329	1.19467
3172.04	0.000663		3172.04	0.001581	0.301581			3172.04	-0.002096	0.597904		3172.04	-0.005432	0.894568			3172.04	-0.005323	1.19468
3171.07	0.000599		3171.07	0.001509	0.301509			3171.07	-0.002138	0.597862		3171.07	-0.005444	0.894556			3171.07	-0.005322	1.19468
3170.11	0.000578		3170.11	0.001456	0.301456			3170.11	-0.002184	0.597816		3170.11	-0.005456	0.894544			3170.11	-0.005347	1.19465
3169.14	0.000607		3169.14	0.00145	0.30145			3169.14	-0.002208	0.597792		3169.14	-0.005451	0.894549			3169.14	-0.005366	1.19463
3168.18	0.000636		3168.18	0.00144	0.30144			3168.18	-0.002193	0.597807		3168.18	-0.005449	0.894551			3168.18	-0.005358	1.19464
3167.22	0.00062		3167.22	0.001388	0.301388			3167.22	-0.002176	0.597824		3167.22	-0.005453	0.894547			3167.22	-0.005338	1.19466
3166.25	0.000567		3166.25	0.001333	0.301333			3166.25	-0.002187	0.597813		3166.25	-0.005433	0.894567			3166.25	-0.005347	1.19465
3165.29	0.000506		3165.29	0.001294	0.301294			3165.29	-0.00222	0.59778		3165.29	-0.005404	0.894596			3165.29	-0.005389	1.19461
3164.32	0.000457		3164.32	0.001253	0.301253			3164.32	-0.002261	0.597739		3164.32	-0.005416	0.894584			3164.32	-0.00542	1.19458
3163.36	0.000428		3163.36	0.001205	0.301205			3163.36	-0.002285	0.597715		3163.36	-0.005457	0.894543			3163.36	-0.005434	1.19457
3162.4	0.000431		3162.4	0.001168	0.301168			3162.4	-0.002285	0.597715		3162.4	-0.005476	0.894524			3162.4	-0.005428	1.19457
3161.43	0.000469		3161.43	0.001169	0.301169			3161.43	-0.002286	0.597714		3161.43	-0.005456	0.894544			3161.43	-0.00539	1.19461
3160.47	0.000509		3160.47	0.001199	0.301199			3160.47	-0.002299	0.597701		3160.47	-0.005437	0.894563			3160.47	-0.005351	1.19465
3159.5	0.000515		3159.5	0.001217	0.301217			3159.5	-0.002304	0.597696		3159.5	-0.005463	0.894537			3159.5	-0.005349	1.19465
3158.54	0.000483		3158.54	0.001227	0.301227			3158.54	-0.002287	0.597713		3158.54	-0.005525	0.894475			3158.54	-0.005387	1.19461
3157.57	0.000428		3157.57	0.001231	0.301231			3157.57	-0.002287	0.597713		3157.57	-0.005588	0.894412			3157.57	-0.005437	1.19456
3156.61	0.000368		3156.61	0.001197	0.301197			3156.61	-0.002324	0.597676		3156.61	-0.005628	0.894372			3156.61	-0.005473	1.19453
3155.65	0.000324		3155.65	0.001132	0.301132			3155.65	-0.002352	0.597648		3155.65	-0.005625	0.894375			3155.65	-0.005475	1.19453
3154.68	0.00032		3154.68	0.001082	0.301082			3154.68	-0.002344	0.597656		3154.68	-0.005582	0.894418			3154.68	-0.005435	1.19456
3153.72	0.00036		3153.72	0.001065	0.301065			3153.72	-0.002331	0.597669		3153.72	-0.005525	0.894475			3153.72	-0.005396	1.1946
3152.75	0.000405		3152.75	0.001055	0.301055			3152.75	-0.002342	0.597658		3152.75	-0.005501	0.894499			3152.75	-0.005404	1.1946
3151.79	0.000431		3151.79	0.001039	0.301039			3151.79	-0.002362	0.597638		3151.79	-0.005536	0.894464			3151.79	-0.005438	1.19456
3150.83	0.000443		3150.83	0.001035	0.301035			3150.83	-0.002369	0.597631		3150.83	-0.005588	0.894412			3150.83	-0.005451	1.19455
3149.86	0.000425		3149.86	0.001047	0.301047			3149.86	-0.002372	0.597628		3149.86	-0.005618	0.894382			3149.86	-0.005447	1.19455
3148.9	0.000391		3148.9	0.001056	0.301056			3148.9	-0.002375	0.597625		3148.9	-0.005632	0.894368			3148.9	-0.005471	1.19453
3147.93	0.000362		3147.93	0.001021	0.301021			3147.93	-0.002381	0.597619		3147.93	-0.005633	0.894367			3147.93	-0.005521	1.19448
3146.97	0.000323		3146.97	0.000944	0.300944			3146.97	-0.002398	0.597602		3146.97	-0.005628	0.894372			3146.97	-0.005549	1.19445
3146	0.0003		3146	0.000914	0.300914			3146	-0.0024	0.5976		3146	-0.005631	0.894369			3146	-0.005537	1.19446
3145.04	0.00031		3145.04	0.000947	0.300947			3145.04	-0.002382	0.597618		3145.04	-0.005637	0.894363			3145.04	-0.005524	1.19448
3144.08	0.000307		3144.08	0.000957	0.300957			3144.08	-0.002378	0.597622		3144.08	-0.005623	0.894377			3144.08	-0.005529	1.19447
3143.11	0.000291		3143.11	0.000924	0.300924			3143.11	-0.002382	0.597618		3143.11	-0.005613	0.894387			3143.11	-0.005551	1.19445
3142.15	0.000278		3142.15	0.00088	0.30088			3142.15	-0.002386	0.597614		3142.15	-0.005654	0.894346			3142.15	-0.005598	1.1944
3141.18	0.000254		3141.18	0.000834	0.300834			3141.18	-0.002392	0.597608		3141.18	-0.005708	0.894292			3141.18	-0.005636	1.19436
3140.22	0.000227		3140.22	0.000792	0.300792			3140.22	-0.002399	0.597601		3140.22	-0.005715	0.894285			3140.22	-0.005632	1.19437
3139.26	0.000214		3139.26	0.000774	0.300774			3139.26	-0.002418	0.597582		3139.26	-0.005706	0.894294			3139.26	-0.005626	1.19437
3138.29	0.000209		3138.29	0.000764	0.300764			3138.29	-0.002442	0.597558		3138.29	-0.005728	0.894272			3138.29	-0.005625	1.19437
3137.33	0.000224		3137.33	0.000757	0.300757			3137.33	-0.002452	0.597548		3137.33	-0.005743	0.894257			3137.33	-0.0056	1.1944
3136.36	0.000253		3136.36	0.000764	0.300764			3136.36	-0.002458	0.597542		3136.36	-0.005706	0.894294			3136.36	-0.005562	1.19444
3135.4	0.000258		3135.4	0.000769	0.300769			3135.4	-0.002468	0.597532		3135.4	-0.005638	0.894362			3135.4	-0.005534	1.19447
3134.44	0.000297		3134.44	0.000811	0.300811			3134.44	-0.002442	0.597558		3134.44	-0.005545	0.894455			3134.44	-0.005498	1.1945
3133.47	0.000404		3133.47	0.00091	0.30091			3133.47	-0.002375	0.597625		3133.47	-0.005441	0.894559			3133.47	-0.005457	1.19454
3132.51	0.00041		3132.51	0.000904	0.300904			3132.51	-0.002353	0.597647		3132.51	-0.005445	0.894555			3132.51	-0.00546	1.19454
3131.54	0.000262		3131.54	0.000745	0.300745			3131.54	-0.002409	0.597591		3131.54	-0.005567	0.894433			3131.54	-0.005506	1.19449
3130.58	0.000144		3130.58	0.000611	0.300611			3130.58	-0.002489	0.597511		3130.58	-0.005672	0.894328			3130.58	-0.005553	1.19445
3129.61	0.000108		3129.61	0.000569	0.300569			3129.61	-0.00256	0.59744		3129.61	-0.005727	0.894273			3129.61	-0.005586	1.19441
3128.65	0.000122		3128.65	0.000588	0.300588			3128.65	-0.002584	0.597416		3128.65	-0.005736	0.894264			3128.65	-0.005593	1.19441
3127.69	0.0002		3127.69	0.000651	0.300651			3127.69	-0.002555	0.597445		3127.69	-0.005669	0.894331			3127.69	-0.005565	1.19443
3126.72	0.000258		3126.72	0.000695	0.300695			3126.72	-0.002535	0.597465		3126.72	-0.005591	0.894409			3126.72	-0.005534	1.19447
3125.76	0.000197		3125.76	0.000643	0.300643			3125.76	-0.002555	0.597445		3125.76	-0.005612	0.894388			3125.76	-0.005548	1.19445
3124.79	9.9e-05		3124.79	0.000559	0.300559			3124.79	-0.002591	0.597409		3124.79	-0.005686	0.894314			3124.79	-0.005594	1.19441
3123.83	0.000129		3123.83	0.000595	0.300595			3123.83	-0.002598	0.597402		3123.83	-0.005676	0.894324			3123.83	-0.005595	1.1944
3122.87	0.000266		3122.87	0.000717	0.300717			3122.87	-0.002556	0.597444		3122.87	-0.005603	0.894397			3122.87	-0.005565	1.19443
3121.9	0.000292		3121.9	0.000709	0.300709			3121.9	-0.002528	0.597472		3121.9	-0.005632	0.894368			3121.9	-0.005612	1.19439
3120.94	0.000185		3120.94	0.000586	0.300586			3120.94	-0.002544	0.597456		3120.94	-0.005757	0.894243			3120.94	-0.005712	1.19429
3119.97	0.000164		3119.97	0.000566	0.300566			3119.97	-0.002536	0.597464		3119.97	-0.005785	0.894215			3119.97	-0.005712	1.19429
3119.01	0.000253		3119.01	0.000646	0.300646			3119.01	-0.002489	0.597511		3119.01	-0.005705	0.894295			3119.01	-0.005621	1.19438
3118.04	0.000283		3118.04	0.000664	0.300664			3118.04	-0.002461	0.597539		3118.04	-0.005671	0.894329			3118.04	-0.005567	1.19443
3117.08	0.000268		3117.08	0.000634	0.300634			3117.08	-0.002449	0.597551		3117.08	-0.005674	0.894326			3117.08	-0.005562	1.19444
3116.12	0.000294		3116.12	0.000626	0.300626			3116.12	-0.00245	0.59755		3116.12	-0.005642	0.894358			3116.12	-0.005573	1.19443
3115.15	0.000252		3115.15	0.000585	0.300585			3115.15	-0.002507	0.597493		3115.15	-0.005648	0.894352			3115.15	-0.005621	1.19438
3114.19	0.000117		3114.19	0.000519	0.300519			3114.19	-0.002578	0.597422		3114.19	-0.005723	0.894277			3114.19	-0.005683	1.19432
3113.22	4.6e-05		3113.22	0.000497	0.300497			3113.22	-0.002597	0.597403		3113.22	-0.005762	0.894238			3113.22	-0.00569	1.19431
3112.26	5.4e-05		3112.26	0.000492	0.300492			3112.26	-0.002586	0.597414		3112.26	-0.005737	0.894263			3112.26	-0.005648	1.19435
3111.3	3.6e-05		3111.3	0.000457	0.300457			3111.3	-0.002596	0.597404		3111.3	-0.005719	0.894281			3111.3	-0.005606	1.19439
3110.33	0		3110.33	0.000417	0.300417			3110.33	-0.00262	0.59738		3110.33	-0.005727	0.894273			3110.33	-0.005583	1.19442
3109.37	-1e-06		3109.37	0.000412	0.300412			3109.37	-0.002616	0.597384		3109.37	-0.005723	0.894277			3109.37	-0.00559	1.19441
3108.4	3.9e-05		3108.4	0.000438	0.300438			3108.4	-0.002584	0.597416		3108.4	-0.005681	0.894319			3108.4	-0.005602	1.1944
3107.44	8.4e-05		3107.44	0.000457	0.300457			3107.44	-0.002558	0.597442		3107.44	-0.00565	0.89435			3107.44	-0.005611	1.19439
3106.47	8.2e-05		3106.47	0.000443	0.300443			3106.47	-0.002554	0.597446		3106.47	-0.005699	0.894301			3106.47	-0.00565	1.19435
3105.51	5.3e-05		3105.51	0.000426	0.300426			3105.51	-0.002553	0.597447		3105.51	-0.005781	0.894219			3105.51	-0.005686	1.19431
3104.55	7.4e-05		3104.55	0.000447	0.300447			3104.55	-0.002533	0.597467		3104.55	-0.005807	0.894193			3104.55	-0.00568	1.19432
3103.58	0.000149		3103.58	0.000507	0.300507			3103.58	-0.002509	0.597491		3103.58	-0.005741	0.894259			3103.58	-0.005645	1.19436
3102.62	0.000228		3102.62	0.000587	0.300587			3102.62	-0.002497	0.597503		3102.62	-0.005611	0.894389			3102.62	-0.005579	1.19442
3101.65	0.000298		3101.65	0.000665	0.300665			3101.65	-0.002492	0.597508		3101.65	-0.005512	0.894488			3101.65	-0.005493	1.19451
3100.69	0.000336		3100.69	0.000691	0.300691			3100.69	-0.002498	0.597502		3100.69	-0.005494	0.894506			3100.69	-0.005442	1.19456
3099.73	0.000308		3099.73	0.000636	0.300636			3099.73	-0.002508	0.597492		3099.73	-0.005532	0.894468			3099.73	-0.005455	1.19454
3098.76	0.00024		3098.76	0.000571	0.300571			3098.76	-0.002491	0.597509		3098.76	-0.005583	0.894417			3098.76	-0.005489	1.19451
3097.8	0.000228		3097.8	0.00061	0.30061			3097.8	-0.002429	0.597571		3097.8	-0.005571	0.894429			3097.8	-0.00547	1.19453
3096.83	0.000318		3096.83	0.000754	0.300754			3096.83	-0.002347	0.597653		3096.83	-0.005453	0.894547			3096.83	-0.005383	1.19462
3095.87	0.000379		3095.87	0.000835	0.300835			3095.87	-0.002318	0.597682		3095.87	-0.005368	0.894632			3095.87	-0.005333	1.19467
3094.91	0.0003		3094.91	0.000753	0.300753			3094.91	-0.002357	0.597643		3094.91	-0.005444	0.894556			3094.91	-0.00539	1.19461
3093.94	0.000187		3093.94	0.00065	0.30065			3093.94	-0.002365	0.597635		3093.94	-0.005548	0.894452			3093.94	-0.005444	1.19456
3092.98	0.000129		3092.98	0.000622	0.300622			3092.98	-0.002329	0.597671		3092.98	-0.005552	0.894448			3092.98	-0.005409	1.19459
3092.01	0.000115		3092.01	0.000609	0.300609			3092.01	-0.002319	0.597681		3092.01	-0.005531	0.894469			3092.01	-0.005356	1.19464
3091.05	0.000138		3091.05	0.000586	0.300586			3091.05	-0.002326	0.597674		3091.05	-0.005559	0.894441			3091.05	-0.005353	1.19465
3090.08	0.00017		3090.08	0.000582	0.300582			3090.08	-0.002318	0.597682		3090.08	-0.005593	0.894407			3090.08	-0.005362	1.19464
3089.12	0.000189		3089.12	0.000604	0.300604			3089.12	-0.002301	0.597699		3089.12	-0.005585	0.894415			3089.12	-0.005337	1.19466
3088.16	0.000196		3088.16	0.000636	0.300636			3088.16	-0.002289	0.597711		3088.16	-0.005553	0.894447			3088.16	-0.005286	1.19471
3087.19	0.000193		3087.19	0.000654	0.300654			3087.19	-0.002293	0.597707		3087.19	-0.005535	0.894465			3087.19	-0.00525	1.19475
3086.23	0.000189		3086.23	0.000652	0.300652			3086.23	-0.002298	0.597702		3086.23	-0.005535	0.894465			3086.23	-0.005251	1.19475
3085.26	0.000187		3085.26	0.000644	0.300644			3085.26	-0.002292	0.597708		3085.26	-0.005554	0.894446			3085.26	-0.005282	1.19472
3084.3	0.000188		3084.3	0.000656	0.300656			3084.3	-0.002278	0.597722		3084.3	-0.005578	0.894422			3084.3	-0.005314	1.19469
3083.34	0.00022		3083.34	0.000709	0.300709			3083.34	-0.00226	0.59774		3083.34	-0.005558	0.894442			3083.34	-0.005322	1.19468
3082.37	0.000275		3082.37	0.000767	0.300767			3082.37	-0.002248	0.597752		3082.37	-0.005497	0.894503			3082.37	-0.005332	1.19467
3081.41	0.00031		3081.41	0.000777	0.300777			3081.41	-0.002259	0.597741		3081.41	-0.005442	0.894558			3081.41	-0.005358	1.19464
3080.44	0.000327		3080.44	0.000753	0.300753			3080.44	-0.00229	0.59771		3080.44	-0.005393	0.894607			3080.44	-0.005356	1.19464
3079.48	0.000326		3079.48	0.000719	0.300719			3079.48	-0.002307	0.597693		3079.48	-0.005373	0.894627			3079.48	-0.005328	1.19467
3078.51	0.000294		3078.51	0.000668	0.300668			3078.51	-0.002307	0.597693		3078.51	-0.005429	0.894571			3078.51	-0.005331	1.19467
3077.55	0.000233		3077.55	0.000593	0.300593			3077.55	-0.002321	0.597679		3077.55	-0.005513	0.894487			3077.55	-0.005359	1.19464
3076.59	0.000141		3076.59	0.000525	0.300525			3076.59	-0.002359	0.597641		3076.59	-0.005544	0.894456			3076.59	-0.005384	1.19462
3075.62	5.7e-05		3075.62	0.000515	0.300515			3075.62	-0.00239	0.59761		3075.62	-0.005537	0.894463			3075.62	-0.0054	1.1946
3074.66	3.6e-05		3074.66	0.000552	0.300552			3074.66	-0.002391	0.597609		3074.66	-0.005538	0.894462			3074.66	-0.005402	1.1946
3073.69	5.9e-05		3073.69	0.000566	0.300566			3073.69	-0.002366	0.597634		3073.69	-0.005562	0.894438			3073.69	-0.005389	1.19461
3072.73	8.3e-05		3072.73	0.000539	0.300539			3072.73	-0.002336	0.597664		3072.73	-0.005605	0.894395			3072.73	-0.005383	1.19462
3071.77	9.2e-05		3071.77	0.00051	0.30051			3071.77	-0.002322	0.597678		3071.77	-0.005634	0.894366			3071.77	-0.005382	1.19462
3070.8	7.6e-05		3070.8	0.000502	0.300502			3070.8	-0.002331	0.597669		3070.8	-0.005612	0.894388			3070.8	-0.00536	1.19464
3069.84	3e-05		3069.84	0.000496	0.300496			3069.84	-0.002355	0.597645		3069.84	-0.005562	0.894438			3069.84	-0.005337	1.19466
3068.87	6e-06		3068.87	0.000495	0.300495			3068.87	-0.002371	0.597629		3068.87	-0.00552	0.89448			3068.87	-0.005336	1.19466
3067.91	0.0001		3067.91	0.00056	0.30056			3067.91	-0.002334	0.597666		3067.91	-0.005462	0.894538			3067.91	-0.005304	1.1947
3066.94	0.000228		3066.94	0.000649	0.300649			3066.94	-0.002273	0.597727		3066.94	-0.005402	0.894598			3066.94	-0.005246	1.19475
3065.98	0.000284		3065.98	0.000679	0.300679			3065.98	-0.002241	0.597759		3065.98	-0.005406	0.894594			3065.98	-0.005248	1.19475
3065.02	0.000356		3065.02	0.000716	0.300716			3065.02	-0.002218	0.597782		3065.02	-0.005428	0.894572			3065.02	-0.005296	1.1947
3064.05	0.000379		3064.05	0.00073	0.30073			3064.05	-0.002226	0.597774		3064.05	-0.005447	0.894553			3064.05	-0.005352	1.19465
3063.09	0.000235		3063.09	0.000633	0.300633			3063.09	-0.002295	0.597705		3063.09	-0.005514	0.894486			3063.09	-0.005415	1.19459
3062.12	8.7e-05		3062.12	0.000537	0.300537			3062.12	-0.002348	0.597652		3062.12	-0.005573	0.894427			3062.12	-0.005431	1.19457
3061.16	5.9e-05		3061.16	0.000518	0.300518			3061.16	-0.002348	0.597652		3061.16	-0.005554	0.894446			3061.16	-0.005383	1.19462
3060.2	6.4e-05		3060.2	0.000486	0.300486			3060.2	-0.00236	0.59764		3060.2	-0.005501	0.894499			3060.2	-0.005315	1.19468
3059.23	2.7e-05		3059.23	0.000418	0.300418			3059.23	-0.002403	0.597597		3059.23	-0.005492	0.894508			3059.23	-0.005286	1.19471
3058.27	1e-05		3058.27	0.0004	0.3004			3058.27	-0.002425	0.597575		3058.27	-0.005513	0.894487			3058.27	-0.005301	1.1947
3057.3	0.000116		3057.3	0.00048	0.30048			3057.3	-0.002386	0.597614		3057.3	-0.005465	0.894535			3057.3	-0.005303	1.1947
3056.34	0.000266		3056.34	0.000574	0.300574			3056.34	-0.002312	0.597688		3056.34	-0.005379	0.894621			3056.34	-0.005301	1.1947
3055.38	0.000269		3055.38	0.000578	0.300578			3055.38	-0.002277	0.597723		3055.38	-0.005395	0.894605			3055.38	-0.005346	1.19465
3054.41	0.000142		3054.41	0.000515	0.300515			3054.41	-0.002293	0.597707		3054.41	-0.005478	0.894522			3054.41	-0.005385	1.19461
3053.45	4.2e-05		3053.45	0.000449	0.300449			3053.45	-0.002299	0.597701		3053.45	-0.005512	0.894488			3053.45	-0.005376	1.19462
3052.48	1.8e-05		3052.48	0.000394	0.300394			3052.48	-0.002298	0.597702		3052.48	-0.00553	0.89447			3052.48	-0.005368	1.19463
3051.52	2.8e-05		3051.52	0.000355	0.300355			3051.52	-0.002327	0.597673		3051.52	-0.005561	0.894439			3051.52	-0.005378	1.19462
3050.55	6.7e-05		3050.55	0.000371	0.300371			3050.55	-0.002341	0.597659		3050.55	-0.005543	0.894457			3050.55	-0.005352	1.19465
3049.59	0.000153		3049.59	0.000448	0.300448			3049.59	-0.002306	0.597694		3049.59	-0.005463	0.894537			3049.59	-0.005277	1.19472
3048.63	0.000189		3048.63	0.000493	0.300493			3048.63	-0.00228	0.59772		3048.63	-0.005395	0.894605			3048.63	-0.005219	1.19478
3047.66	0.000111		3047.66	0.000448	0.300448			3047.66	-0.002287	0.597713		3047.66	-0.00539	0.89461			3047.66	-0.005214	1.19479
3046.7	4.7e-05		3046.7	0.0004	0.3004			3046.7	-0.002268	0.597732		3046.7	-0.00542	0.89458			3046.7	-0.00523	1.19477
3045.73	5.4e-05		3045.73	0.000399	0.300399			3045.73	-0.002213	0.597787		3045.73	-0.005439	0.894561			3045.73	-0.005239	1.19476
3044.77	5.2e-05		3044.77	0.000398	0.300398			3044.77	-0.002183	0.597817		3044.77	-0.005412	0.894588			3044.77	-0.005226	1.19477
3043.81	2.8e-05		3043.81	0.000369	0.300369			3043.81	-0.002213	0.597787		3043.81	-0.005364	0.894636			3043.81	-0.005192	1.19481
3042.84	3.4e-05		3042.84	0.000344	0.300344			3042.84	-0.002263	0.597737		3042.84	-0.005355	0.894645			3042.84	-0.005167	1.19483
3041.88	7.5e-05		3041.88	0.000356	0.300356			3041.88	-0.002258	0.597742		3041.88	-0.005364	0.894636			3041.88	-0.005145	1.19486
3040.91	0.00011		3040.91	0.000387	0.300387			3040.91	-0.002197	0.597803		3040.91	-0.005349	0.894651			3040.91	-0.005109	1.19489
3039.95	0.000109		3039.95	0.000402	0.300402			3039.95	-0.002151	0.597849		3039.95	-0.005328	0.894672			3039.95	-0.005072	1.19493
3038.98	7.1e-05		3038.98	0.00039	0.30039			3038.98	-0.002154	0.597846		3038.98	-0.00532	0.89468			3038.98	-0.005041	1.19496
3038.02	4.4e-05		3038.02	0.000379	0.300379			3038.02	-0.002168	0.597832		3038.02	-0.005324	0.894676			3038.02	-0.005037	1.19496
3037.06	9.3e-05		3037.06	0.000404	0.300404			3037.06	-0.002163	0.597837		3037.06	-0.005326	0.894674			3037.06	-0.005065	1.19493
3036.09	0.000213		3036.09	0.000458	0.300458			3036.09	-0.002143	0.597857		3036.09	-0.005273	0.894727			3036.09	-0.005048	1.19495
3035.13	0.000338		3035.13	0.000516	0.300516			3035.13	-0.002114	0.597886		3035.13	-0.005166	0.894834			3035.13	-0.004973	1.19503
3034.16	0.000385		3034.16	0.000542	0.300542			3034.16	-0.002096	0.597904		3034.16	-0.005112	0.894888			3034.16	-0.004946	1.19505
3033.2	0.000368		3033.2	0.000542	0.300542			3033.2	-0.002102	0.597898		3033.2	-0.00512	0.89488			3033.2	-0.004965	1.19503
3032.24	0.00042		3032.24	0.000585	0.300585			3032.24	-0.0021	0.5979		3032.24	-0.005079	0.894921			3032.24	-0.004926	1.19507
3031.27	0.000489		3031.27	0.000613	0.300613			3031.27	-0.002097	0.597903		3031.27	-0.005034	0.894966			3031.27	-0.004881	1.19512
3030.31	0.000386		3030.31	0.000508	0.300508			3030.31	-0.002139	0.597861		3030.31	-0.005098	0.894902			3030.31	-0.004943	1.19506
3029.34	0.000194		3029.34	0.00037	0.30037			3029.34	-0.002177	0.597823		3029.34	-0.005225	0.894775			3029.34	-0.005045	1.19495
3028.38	9.3e-05		3028.38	0.000332	0.300332			3028.38	-0.002155	0.597845		3028.38	-0.005318	0.894682			3028.38	-0.005091	1.19491
3027.42	8.5e-05		3027.42	0.00037	0.30037			3027.42	-0.002119	0.597881		3027.42	-0.005348	0.894652			3027.42	-0.005089	1.19491
3026.45	0.000125		3026.45	0.000435	0.300435			3026.45	-0.002106	0.597894		3026.45	-0.005332	0.894668			3026.45	-0.005079	1.19492
3025.49	0.000149		3025.49	0.000467	0.300467			3025.49	-0.002108	0.597892		3025.49	-0.005314	0.894686			3025.49	-0.005103	1.1949
3024.52	0.000102		3024.52	0.000406	0.300406			3024.52	-0.002125	0.597875		3024.52	-0.005305	0.894695			3024.52	-0.005132	1.19487
3023.56	4.1e-05		3023.56	0.000289	0.300289			3023.56	-0.002163	0.597837		3023.56	-0.005285	0.894715			3023.56	-0.005093	1.19491
3022.59	2.1e-05		3022.59	0.000193	0.300193			3022.59	-0.002209	0.597791		3022.59	-0.005273	0.894727			3022.59	-0.005031	1.19497
3021.63	1.9e-05		3021.63	0.000138	0.300138			3021.63	-0.002233	0.597767		3021.63	-0.005303	0.894697			3021.63	-0.005049	1.19495
3020.67	1.1e-05		3020.67	0.000112	0.300112			3020.67	-0.002233	0.597767		3020.67	-0.005329	0.894671			3020.67	-0.005129	1.19487
3019.7	0		3019.7	8.7e-05	0.300087			3019.7	-0.002231	0.597769		3019.7	-0.005304	0.894696			3019.7	-0.005173	1.19483
3018.74	7e-06		3018.74	5.1e-05	0.300051			3018.74	-0.002223	0.597777		3018.74	-0.005261	0.894739			3018.74	-0.00516	1.19484
3017.77	2.6e-05		3017.77	3.7e-05	0.300037			3017.77	-0.002193	0.597807		3017.77	-0.005243	0.894757			3017.77	-0.005138	1.19486
3016.81	4.3e-05		3016.81	5.9e-05	0.300059			3016.81	-0.002165	0.597835		3016.81	-0.005231	0.894769			3016.81	-0.005129	1.19487
3015.85	7e-05		3015.85	9.3e-05	0.300093			3015.85	-0.002168	0.597832		3015.85	-0.005219	0.894781			3015.85	-0.005135	1.19487
3014.88	0.000104		3014.88	0.000114	0.300114			3014.88	-0.00218	0.59782		3014.88	-0.005242	0.894758			3014.88	-0.005145	1.19486
3013.92	0.000185		3013.92	0.000165	0.300165			3013.92	-0.002144	0.597856		3013.92	-0.005252	0.894748			3013.92	-0.005125	1.19487
3012.95	0.000314		3012.95	0.00024	0.30024			3012.95	-0.002084	0.597916		3012.95	-0.005201	0.894799			3012.95	-0.005075	1.19493
3011.99	0.000337		3011.99	0.000234	0.300234			3011.99	-0.002085	0.597915		3011.99	-0.005165	0.894835			3011.99	-0.005046	1.19495
3011.02	0.000234		3011.02	0.000164	0.300164			3011.02	-0.00214	0.59786		3011.02	-0.005182	0.894818			3011.02	-0.005058	1.19494
3010.06	0.000139		3010.06	0.000107	0.300107			3010.06	-0.00218	0.59782		3010.06	-0.005219	0.894781			3010.06	-0.005099	1.1949
3009.1	7.5e-05		3009.1	5.5e-05	0.300055			3009.1	-0.002179	0.597821		3009.1	-0.005272	0.894728			3009.1	-0.005148	1.19485
3008.13	2.8e-05		3008.13	1.6e-05	0.300016			3008.13	-0.002156	0.597844		3008.13	-0.005322	0.894678			3008.13	-0.005172	1.19483
3007.17	0		3007.17	0	0.3			3007.17	-0.002142	0.597858		3007.17	-0.005334	0.894666			3007.17	-0.005169	1.19483
3006.2	4e-06		3006.2	3e-06	0.300003			3006.2	-0.00213	0.59787		3006.2	-0.0053	0.8947			3006.2	-0.005151	1.19485
3005.24	6.6e-05		3005.24	4.7e-05	0.300047			3005.24	-0.002103	0.597897		3005.24	-0.005243	0.894757			3005.24	-0.005111	1.19489
3004.28	0.000133		3004.28	0.000105	0.300105			3004.28	-0.002087	0.597913		3004.28	-0.005235	0.894765			3004.28	-0.005079	1.19492
3003.31	0.000125		3003.31	0.000103	0.300103			3003.31	-0.002113	0.597887		3003.31	-0.005296	0.894704			3003.31	-0.005097	1.1949
3002.35	5e-05		3002.35	4.7e-05	0.300047			3002.35	-0.002149	0.597851		3002.35	-0.005336	0.894664			3002.35	-0.005137	1.19486
3001.38	-7e-06		3001.38	1.1e-05	0.300011			3001.38	-0.002145	0.597855		3001.38	-0.005307	0.894693			3001.38	-0.005143	1.19486
3000.42	2e-06		3000.42	8e-06	0.300008			3000.42	-0.002114	0.597886		3000.42	-0.005252	0.894748			3000.42	-0.005108	1.19489
2999.45	3.1e-05		2999.45	-1e-06	0.299999			2999.45	-0.002104	0.597896		2999.45	-0.005216	0.894784			2999.45	-0.005067	1.19493
2998.49	3.7e-05		2998.49	-1.9e-05	0.299981			2998.49	-0.002105	0.597895		2998.49	-0.005224	0.894776			2998.49	-0.00507	1.19493
2997.53	3.3e-05		2997.53	-1.2e-05	0.299988			2997.53	-0.002086	0.597914		2997.53	-0.005262	0.894738			2997.53	-0.00511	1.19489
2996.56	4.9e-05		2996.56	3.4e-05	0.300034			2996.56	-0.002059	0.597941		2996.56	-0.005263	0.894737			2996.56	-0.00511	1.19489
2995.6	0.000118		2995.6	0.00012	0.30012			2995.6	-0.002028	0.597972		2995.6	-0.005209	0.894791			2995.6	-0.005058	1.19494
2994.63	0.000208		2994.63	0.0002	0.3002			2994.63	-0.001986	0.598014		2994.63	-0.005155	0.894845			2994.63	-0.005006	1.19499
2993.67	0.000233		2993.67	0.000227	0.300227			2993.67	-0.001951	0.598049		2993.67	-0.005128	0.894872			2993.67	-0.004964	1.19504
2992.71	0.00021		2992.71	0.000226	0.300226			2992.71	-0.00193	0.59807		2992.71	-0.005105	0.894895			2992.71	-0.004947	1.19505
2991.74	0.000202		2991.74	0.000228	0.300228			2991.74	-0.001909	0.598091		2991.74	-0.005076	0.894924			2991.74	-0.004963	1.19504
2990.78	0.00022		2990.78	0.000241	0.300241			2990.78	-0.001863	0.598137		2990.78	-0.005036	0.894964			2990.78	-0.004954	1.19505
2989.81	0.000261		2989.81	0.000295	0.300295			2989.81	-0.001784	0.598216		2989.81	-0.004972	0.895028			2989.81	-0.004881	1.19512
2988.85	0.000312		2988.85	0.000376	0.300376			2988.85	-0.001728	0.598272		2988.85	-0.00491	0.89509			2988.85	-0.004784	1.19522
2987.89	0.000357		2987.89	0.000431	0.300431			2987.89	-0.001726	0.598274		2987.89	-0.004866	0.895134			2987.89	-0.00471	1.19529
2986.92	0.000392		2986.92	0.000452	0.300452			2986.92	-0.001729	0.598271		2986.92	-0.004818	0.895182			2986.92	-0.004667	1.19533
2985.96	0.000411		2985.96	0.000462	0.300462			2985.96	-0.001709	0.598291		2985.96	-0.004761	0.895239			2985.96	-0.004635	1.19537
2984.99	0.000426		2984.99	0.000473	0.300473			2984.99	-0.001682	0.598318		2984.99	-0.004722	0.895278			2984.99	-0.004586	1.19541
2984.03	0.000444		2984.03	0.000487	0.300487			2984.03	-0.001641	0.598359		2984.03	-0.004698	0.895302			2984.03	-0.004515	1.19548
2983.06	0.000484		2983.06	0.000535	0.300535			2983.06	-0.001579	0.598421		2983.06	-0.004658	0.895342			2983.06	-0.004454	1.19555
2982.1	0.000576		2982.1	0.000647	0.300647			2982.1	-0.001487	0.598513		2982.1	-0.004584	0.895416			2982.1	-0.004399	1.1956
2981.14	0.000708		2981.14	0.00078	0.30078			2981.14	-0.001364	0.598636		2981.14	-0.004459	0.895541			2981.14	-0.004304	1.1957
2980.17	0.000833		2980.17	0.000896	0.300896			2980.17	-0.001226	0.598774		2980.17	-0.004322	0.895678			2980.17	-0.004177	1.19582
2979.21	0.000938		2979.21	0.001012	0.301012			2979.21	-0.001092	0.598908		2979.21	-0.004227	0.895773			2979.21	-0.004073	1.19593
2978.24	0.001038		2978.24	0.00114	0.30114			2978.24	-0.000981	0.599019		2978.24	-0.004137	0.895863			2978.24	-0.003984	1.19602
2977.28	0.001122		2977.28	0.001258	0.301258			2977.28	-0.0009	0.5991		2977.28	-0.004041	0.895959			2977.28	-0.003904	1.1961
2976.32	0.001199		2976.32	0.001365	0.301365			2976.32	-0.000823	0.599177		2976.32	-0.003971	0.896029			2976.32	-0.003833	1.19617
2975.35	0.00131		2975.35	0.001484	0.301484			2975.35	-0.000726	0.599274		2975.35	-0.003891	0.896109			2975.35	-0.003731	1.19627
2974.39	0.001448		2974.39	0.001622	0.301622			2974.39	-0.000599	0.599401		2974.39	-0.003786	0.896214			2974.39	-0.003588	1.19641
2973.42	0.001569		2973.42	0.001767	0.301767			2973.42	-0.000437	0.599563		2973.42	-0.003686	0.896314			2973.42	-0.003451	1.19655
2972.46	0.001669		2972.46	0.001912	0.301912			2972.46	-0.000258	0.599742		2972.46	-0.003581	0.896419			2972.46	-0.003342	1.19666
2971.49	0.001786		2971.49	0.002061	0.302061			2971.49	-9.5e-05	0.599905		2971.49	-0.003438	0.896562			2971.49	-0.003221	1.19678
2970.53	0.001931		2970.53	0.002208	0.302208			2970.53	4.5e-05	0.600045		2970.53	-0.003271	0.896729			2970.53	-0.003055	1.19694
2969.57	0.002092		2969.57	0.002356	0.302356			2969.57	0.000193	0.600193		2969.57	-0.003095	0.896905			2969.57	-0.002868	1.19713
2968.6	0.00227		2968.6	0.002532	0.302532			2968.6	0.000374	0.600374		2968.6	-0.002925	0.897075			2968.6	-0.002702	1.1973
2967.64	0.002476		2967.64	0.002757	0.302757			2967.64	0.000584	0.600584		2967.64	-0.002775	0.897225			2967.64	-0.002561	1.19744
2966.67	0.0027		2966.67	0.003007	0.303007			2966.67	0.000799	0.600799		2966.67	-0.002596	0.897404			2966.67	-0.002388	1.19761
2965.71	0.002923		2965.71	0.003242	0.303242			2965.71	0.001003	0.601003		2965.71	-0.002353	0.897647			2965.71	-0.002149	1.19785
2964.75	0.003159		2964.75	0.003473	0.303473			2964.75	0.001217	0.601217		2964.75	-0.002116	0.897884			2964.75	-0.001902	1.1981
2963.78	0.003411		2963.78	0.003723	0.303723			2963.78	0.001464	0.601464		2963.78	-0.001914	0.898086			2963.78	-0.001679	1.19832
2962.82	0.003665		2962.82	0.003959	0.303959			2962.82	0.001727	0.601727		2962.82	-0.00167	0.89833			2962.82	-0.001427	1.19857
2961.85	0.003941		2961.85	0.004189	0.304189			2961.85	0.002002	0.602002		2961.85	-0.001363	0.898637			2961.85	-0.00113	1.19887
2960.89	0.004228		2960.89	0.004459	0.304459			2960.89	0.002307	0.602307		2960.89	-0.001054	0.898946			2960.89	-0.00082	1.19918
2959.92	0.004502		2959.92	0.004779	0.304779			2959.92	0.002648	0.602648		2959.92	-0.000747	0.899253			2959.92	-0.0005	1.1995
2958.96	0.004798		2958.96	0.005125	0.305125			2958.96	0.003015	0.603015		2958.96	-0.000406	0.899594			2958.96	-0.000163	1.19984
2958	0.005147		2958	0.005469	0.305469			2958	0.003393	0.603393		2958	-4.3e-05	0.899957			2958	0.000195	1.20019
2957.03	0.005537		2957.03	0.005815	0.305815			2957.03	0.003772	0.603772		2957.03	0.000331	0.900331			2957.03	0.000572	1.20057
2956.07	0.005961		2956.07	0.006195	0.306195			2956.07	0.004172	0.604172		2956.07	0.000739	0.900739			2956.07	0.000966	1.20097
2955.1	0.006414		2955.1	0.006615	0.306615			2955.1	0.004611	0.604611		2955.1	0.001179	0.901179			2955.1	0.001389	1.20139
2954.14	0.006884		2954.14	0.007041	0.307041			2954.14	0.005079	0.605079		2954.14	0.001629	0.901629			2954.14	0.001844	1.20184
2953.18	0.007374		2953.18	0.007458	0.307458			2953.18	0.00557	0.60557		2953.18	0.002086	0.902086			2953.18	0.002309	1.20231
2952.21	0.007905		2952.21	0.007906	0.307906			2952.21	0.006088	0.606088		2952.21	0.002581	0.902581			2952.21	0.002801	1.2028
2951.25	0.008505		2951.25	0.008435	0.308435			2951.25	0.006676	0.606676		2951.25	0.003153	0.903153			2951.25	0.003375	1.20337
2950.28	0.009187		2950.28	0.00906	0.30906			2950.28	0.007371	0.607371		2950.28	0.003812	0.903812			2950.28	0.004033	1.20403
2949.32	0.009949		2949.32	0.00974	0.30974			2949.32	0.00812	0.60812		2949.32	0.00457	0.90457			2949.32	0.004757	1.20476
2948.36	0.010799		2948.36	0.010464	0.310464			2948.36	0.008904	0.608904		2948.36	0.005431	0.905431			2948.36	0.005572	1.20557
2947.39	0.011777		2947.39	0.011308	0.311308			2947.39	0.009818	0.609818		2947.39	0.006369	0.906369			2947.39	0.006493	1.20649
2946.43	0.012919		2946.43	0.012353	0.312353			2946.43	0.010921	0.610921		2946.43	0.007421	0.907421			2946.43	0.007566	1.20757
2945.46	0.014233		2945.46	0.013577	0.313577			2945.46	0.012205	0.612205		2945.46	0.008659	0.908659			2945.46	0.008843	1.20884
2944.5	0.015714		2944.5	0.014931	0.314931			2944.5	0.01365	0.61365		2944.5	0.010081	0.910081			2944.5	0.010281	1.21028
2943.53	0.017375		2943.53	0.016454	0.316454			2943.53	0.015268	0.615268		2943.53	0.011689	0.911689			2943.53	0.011863	1.21186
2942.57	0.019266		2942.57	0.018225	0.318225			2942.57	0.017124	0.617124		2942.57	0.013531	0.913531			2942.57	0.013669	1.21367
2941.61	0.021398		2941.61	0.020248	0.320248			2941.61	0.01923	0.61923		2941.61	0.015584	0.915584			2941.61	0.015732	1.21573
2940.64	0.023719		2940.64	0.022452	0.322452			2940.64	0.021518	0.621518		2940.64	0.017793	0.917793			2940.64	0.017999	1.218
2939.68	0.02621		2939.68	0.024808	0.324808			2939.68	0.02396	0.62396		2939.68	0.020184	0.920184			2939.68	0.020427	1.22043
2938.71	0.028908		2938.71	0.027346	0.327346			2938.71	0.026594	0.626594		2938.71	0.022812	0.922812			2938.71	0.023058	1.22306
2937.75	0.031857		2937.75	0.030122	0.330122			2937.75	0.029478	0.629478		2937.75	0.025704	0.925704			2937.75	0.025971	1.22597
2936.79	0.035087		2936.79	0.033189	0.333189			2936.79	0.032645	0.632645		2936.79	0.028838	0.928838			2936.79	0.02917	1.22917
2935.82	0.038577		2935.82	0.036551	0.336551			2935.82	0.036095	0.636095		2935.82	0.032212	0.932212			2935.82	0.032608	1.23261
2934.86	0.042323		2934.86	0.04019	0.34019			2934.86	0.03983	0.63983		2934.86	0.035882	0.935882			2934.86	0.036314	1.23631
2933.89	0.046373		2933.89	0.044143	0.344143			2933.89	0.043912	0.643912		2933.89	0.039916	0.939916			2933.89	0.040399	1.2404
2932.93	0.050783		2932.93	0.048499	0.348499			2932.93	0.048395	0.648395		2932.93	0.044341	0.944341			2932.93	0.044931	1.24493
2931.96	0.055589		2931.96	0.053286	0.353286			2931.96	0.053254	0.653254		2931.96	0.049165	0.949165			2931.96	0.049889	1.24989
2931	0.060791		2931	0.058461	0.358461			2931	0.058463	0.658463		2931	0.054413	0.954413			2931	0.05524	1.25524
2930.04	0.066383		2930.04	0.064015	0.364015			2930.04	0.064082	0.664082		2930.04	0.060137	0.960137			2930.04	0.06103	1.26103
2929.07	0.072446		2929.07	0.070022	0.370022			2929.07	0.070227	0.670227		2929.07	0.066416	0.966416			2929.07	0.067357	1.26736
2928.11	0.079058		2928.11	0.076598	0.376598			2928.11	0.076971	0.676971		2928.11	0.073278	0.973278			2928.11	0.074268	1.27427
2927.14	0.086308		2927.14	0.083899	0.383899			2927.14	0.084427	0.684427		2927.14	0.080799	0.980799			2927.14	0.081877	1.28188
2926.18	0.094356		2926.18	0.092073	0.392073			2926.18	0.092781	0.692781		2926.18	0.089192	0.989192			2926.18	0.090422	1.29042
2925.22	0.103377		2925.22	0.101284	0.401284			2925.22	0.102222	0.702222		2925.22	0.098671	0.998671			2925.22	0.100125	1.30012
2924.25	0.113501		2924.25	0.111745	0.411745			2924.25	0.112892	0.712892		2924.25	0.109379	1.00938			2924.25	0.111135	1.31113
2923.29	0.124847		2923.29	0.123615	0.423615			2923.29	0.124882	0.724882		2923.29	0.121429	1.02143			2923.29	0.123631	1.32363
2922.32	0.13745		2922.32	0.136932	0.436932			2922.32	0.138214	0.738214		2922.32	0.134865	1.03486			2922.32	0.137761	1.33776
2921.36	0.151262		2921.36	0.151586	0.451586			2921.36	0.152798	0.752798		2921.36	0.149614	1.04961			2921.36	0.153514	1.35351
2920.39	0.166155		2920.39	0.167326	0.467326			2920.39	0.168444	0.768444		2920.39	0.165438	1.06544			2920.39	0.170728	1.37073
2919.43	0.1818		2919.43	0.183674	0.483674			2919.43	0.18479	0.78479		2919.43	0.181812	1.08181			2919.43	0.188979	1.38898
2918.47	0.197506		2918.47	0.199615	0.499615			2918.47	0.201033	0.801033		2918.47	0.197772	1.09777			2918.47	0.207205	1.40721
2917.5	0.211881		2917.5	0.213195	0.513195			2917.5	0.21559	0.81559		2917.5	0.211704	1.1117			2917.5	0.223304	1.4233
2916.54	0.222545		2916.54	0.221798	0.521798			2916.54	0.226088	0.826088		2916.54	0.221355	1.12136			2916.54	0.234259	1.43426
2915.57	0.226725		2915.57	0.22333	0.52333			2915.57	0.230119	0.830119		2915.57	0.224587	1.12459			2915.57	0.237414	1.43741
2914.61	0.223038		2914.61	0.217658	0.517658			2914.61	0.226705	0.826705		2914.61	0.220723	1.12072			2914.61	0.232383	1.43238
2913.65	0.212241		2913.65	0.206325	0.506325			2913.65	0.21651	0.81651		2913.65	0.210523	1.11052			2913.65	0.220673	1.42067
2912.68	0.197477		2912.68	0.19222	0.49222			2912.68	0.202232	0.802232		2912.68	0.196515	1.09652			2912.68	0.205382	1.40538
2911.72	0.182017		2911.72	0.177835	0.477835			2911.72	0.186874	0.786874		2911.72	0.18145	1.08145			2911.72	0.189415	1.38942
2910.75	0.167836		2910.75	0.164586	0.464586			2910.75	0.172454	0.772454		2910.75	0.167189	1.06719			2910.75	0.174595	1.3746
2909.79	0.15561		2909.79	0.152989	0.452989			2909.79	0.159806	0.759806		2909.79	0.154545	1.05455			2909.79	0.16161	1.36161
2908.83	0.145311		2908.83	0.143071	0.443071			2908.83	0.149041	0.749041		2908.83	0.143696	1.0437			2908.83	0.150505	1.35051
2907.86	0.136673		2907.86	0.134681	0.434681			2907.86	0.139955	0.739955		2907.86	0.134524	1.03452			2907.86	0.141146	1.34115
2906.9	0.129389		2906.9	0.12759	0.42759			2906.9	0.132266	0.732266		2906.9	0.126801	1.0268			2906.9	0.133298	1.3333
2905.93	0.123213		2905.93	0.121562	0.421562			2905.93	0.125771	0.725771		2905.93	0.120272	1.02027			2905.93	0.126664	1.32666
2904.97	0.117965		2904.97	0.116426	0.416426			2904.97	0.120286	0.720286		2904.97	0.114706	1.01471			2904.97	0.121032	1.32103
2904	0.113529		2904	0.112068	0.412068			2904	0.115646	0.715646		2904	0.10995	1.00995			2904	0.116278	1.31628
2903.04	0.109819		2903.04	0.108391	0.408391			2903.04	0.111719	0.711719		2903.04	0.105905	1.00591			2903.04	0.112262	1.31226
2902.08	0.106666		2902.08	0.105253	0.405253			2902.08	0.108333	0.708333		2902.08	0.102435	1.00243			2902.08	0.108793	1.30879
2901.11	0.103864		2901.11	0.102497	0.402497			2901.11	0.105322	0.705322		2901.11	0.099393	0.999393			2901.11	0.105747	1.30575
2900.15	0.101297		2900.15	0.100014	0.400014			2900.15	0.102599	0.702599		2900.15	0.096682	0.996682			2900.15	0.103046	1.30305
2899.18	0.098871		2899.18	0.097659	0.397659			2899.18	0.100056	0.700056		2899.18	0.094151	0.994151			2899.18	0.100512	1.30051
2898.22	0.096577		2898.22	0.095378	0.395378			2898.22	0.097653	0.697653		2898.22	0.091717	0.991717			2898.22	0.098053	1.29805
2897.26	0.094346		2897.26	0.093144	0.393144			2897.26	0.095307	0.695307		2897.26	0.089321	0.989321			2897.26	0.095626	1.29563
2896.29	0.092118		2896.29	0.090966	0.390966			2896.29	0.092989	0.692989		2896.29	0.086984	0.986984			2896.29	0.093245	1.29324
2895.33	0.089911		2895.33	0.088848	0.388848			2895.33	0.090745	0.690745		2895.33	0.084757	0.984757			2895.33	0.090929	1.29093
2894.36	0.087756		2894.36	0.086751	0.386751			2894.36	0.088552	0.688552		2894.36	0.082606	0.982606			2894.36	0.088659	1.28866
2893.4	0.085596		2893.4	0.084613	0.384613			2893.4	0.086299	0.686299		2893.4	0.08041	0.98041			2893.4	0.086356	1.28636
2892.43	0.083362		2892.43	0.082418	0.382418			2892.43	0.083967	0.683967		2892.43	0.078123	0.978123			2892.43	0.083997	1.284
2891.47	0.081063		2891.47	0.080168	0.380168			2891.47	0.081606	0.681606		2891.47	0.07578	0.97578			2891.47	0.081613	1.28161
2890.51	0.078734		2890.51	0.077872	0.377872			2890.51	0.079218	0.679218		2890.51	0.073392	0.973392			2890.51	0.079179	1.27918
2889.54	0.076391		2889.54	0.075575	0.375575			2889.54	0.076789	0.676789		2889.54	0.070981	0.970981			2889.54	0.076693	1.27669
2888.58	0.074019		2888.58	0.073289	0.373289			2888.58	0.07432	0.67432		2888.58	0.06858	0.96858			2888.58	0.074199	1.2742
2887.61	0.071581		2887.61	0.070965	0.370965			2887.61	0.071804	0.671804		2887.61	0.066153	0.966153			2887.61	0.071659	1.27166
2886.65	0.069074		2886.65	0.068589	0.368589			2886.65	0.069252	0.669252		2886.65	0.063676	0.963676			2886.65	0.06905	1.26905
2885.69	0.066567		2885.69	0.066207	0.366207			2885.69	0.066706	0.666706		2885.69	0.061222	0.961222			2885.69	0.066435	1.26643
2884.72	0.0641		2884.72	0.063823	0.363823			2884.72	0.064173	0.664173		2884.72	0.058807	0.958807			2884.72	0.063815	1.26381
2883.76	0.061641		2883.76	0.061392	0.361392			2883.76	0.061628	0.661628		2883.76	0.056349	0.956349			2883.76	0.061123	1.26112
2882.79	0.059154		2882.79	0.058894	0.358894			2882.79	0.05905	0.65905		2882.79	0.053841	0.953841			2882.79	0.058363	1.25836
2881.83	0.056667		2881.83	0.056368	0.356368			2881.83	0.056446	0.656446		2881.83	0.051356	0.951356			2881.83	0.055604	1.2556
2880.87	0.054185		2880.87	0.053819	0.353819			2880.87	0.053832	0.653832		2880.87	0.048892	0.948892			2880.87	0.052838	1.25284
2879.9	0.05167		2879.9	0.05124	0.35124			2879.9	0.051208	0.651208		2879.9	0.046426	0.946426			2879.9	0.050043	1.25004
2878.94	0.049091		2878.94	0.048648	0.348648			2878.94	0.048559	0.648559		2878.94	0.043929	0.943929			2878.94	0.047241	1.24724
2877.97	0.046503		2877.97	0.046083	0.346083			2877.97	0.045922	0.645922		2877.97	0.041404	0.941404			2877.97	0.044455	1.24445
2877.01	0.044025		2877.01	0.043621	0.343621			2877.01	0.043375	0.643375		2877.01	0.038944	0.938944			2877.01	0.041748	1.24175
2876.04	0.041699		2876.04	0.041311	0.341311			2876.04	0.040945	0.640945		2876.04	0.036628	0.936628			2876.04	0.039194	1.23919
2875.08	0.039497		2875.08	0.039141	0.339141			2875.08	0.03864	0.63864		2875.08	0.034476	0.934476			2875.08	0.036809	1.23681
2874.12	0.037455		2874.12	0.037114	0.337114			2874.12	0.036525	0.636525		2874.12	0.032512	0.932512			2874.12	0.034625	1.23462
2873.15	0.035672		2873.15	0.035305	0.335305			2873.15	0.034685	0.634685		2873.15	0.030773	0.930773			2873.15	0.032691	1.23269
2872.19	0.034188		2872.19	0.033771	0.333771			2872.19	0.033149	0.633149		2872.19	0.029293	0.929293			2872.19	0.031026	1.23103
2871.22	0.032983		2871.22	0.032511	0.332511			2871.22	0.031887	0.631887		2871.22	0.028097	0.928097			2871.22	0.029645	1.22964
2870.26	0.032057		2870.26	0.031498	0.331498			2870.26	0.030886	0.630886		2870.26	0.027177	0.927177			2870.26	0.02856	1.22856
2869.3	0.031415		2869.3	0.030717	0.330717			2869.3	0.030155	0.630155		2869.3	0.026499	0.926499			2869.3	0.027763	1.22776
2868.33	0.031059		2868.33	0.030233	0.330233			2868.33	0.029745	0.629745		2868.33	0.02608	0.92608			2868.33	0.027269	1.22727
2867.37	0.030957		2867.37	0.030066	0.330066			2867.37	0.02965	0.62965		2867.37	0.025936	0.925936			2867.37	0.027069	1.22707
2866.4	0.031163		2866.4	0.03022	0.33022			2866.4	0.029876	0.629876		2866.4	0.026108	0.926108			2866.4	0.027198	1.2272
2865.44	0.03174		2865.44	0.030707	0.330707			2865.44	0.030458	0.630458		2865.44	0.026615	0.926615			2865.44	0.027692	1.22769
2864.47	0.03273		2864.47	0.031586	0.331586			2864.47	0.03145	0.63145		2864.47	0.027514	0.927514			2864.47	0.028603	1.2286
2863.51	0.034214		2863.51	0.032929	0.332929			2863.51	0.032905	0.632905		2863.51	0.028897	0.928897			2863.51	0.029985	1.22998
2862.55	0.036302		2862.55	0.034809	0.334809			2862.55	0.034919	0.634919		2862.55	0.030859	0.930859			2862.55	0.031916	1.23192
2861.58	0.039043		2861.58	0.037285	0.337285			2861.58	0.037578	0.637578		2861.58	0.033469	0.933469			2861.58	0.034489	1.23449
2860.62	0.042493		2860.62	0.040421	0.340421			2860.62	0.040934	0.640934		2860.62	0.036788	0.936788			2860.62	0.037781	1.23778
2859.65	0.046816		2859.65	0.044328	0.344328			2859.65	0.045128	0.645128		2859.65	0.040938	0.940938			2859.65	0.041903	1.2419
2858.69	0.052203		2858.69	0.049153	0.349153			2858.69	0.050356	0.650356		2858.69	0.04608	0.94608			2858.69	0.046994	1.24699
2857.73	0.058815		2857.73	0.055067	0.355067			2857.73	0.056796	0.656796		2857.73	0.052394	0.952394			2857.73	0.053194	1.25319
2856.76	0.066885		2856.76	0.062256	0.362256			2856.76	0.064677	0.664677		2856.76	0.060122	0.960122			2856.76	0.060704	1.2607
2855.8	0.076769		2855.8	0.070995	0.370995			2855.8	0.07433	0.67433		2855.8	0.069586	0.969586			2855.8	0.069843	1.26984
2854.83	0.08887		2854.83	0.081733	0.381733			2854.83	0.086198	0.686198		2854.83	0.081254	0.981254			2854.83	0.081078	1.28108
2853.87	0.103533		2853.87	0.095093	0.395093			2853.87	0.100816	0.700816		2853.87	0.0958	0.9958			2853.87	0.095098	1.2951
2852.9	0.120987		2852.9	0.111884	0.411884			2852.9	0.118753	0.718753		2852.9	0.113967	1.01397			2852.9	0.112892	1.31289
2851.94	0.141243		2851.94	0.132925	0.432925			2851.94	0.140449	0.740449		2851.94	0.136258	1.03626			2851.94	0.135605	1.3356
2850.98	0.163618		2850.98	0.158231	0.458231			2850.98	0.16555	0.76555		2850.98	0.162116	1.06212			2850.98	0.163706	1.36371
2850.01	0.185753		2850.01	0.185279	0.485279			2850.01	0.191501	0.791501		2850.01	0.188227	1.08823			2850.01	0.19495	1.39495
2849.05	0.202904		2849.05	0.207587	0.507587			2849.05	0.212408	0.812408		2849.05	0.207643	1.10764			2849.05	0.222164	1.42216
2848.08	0.209418		2848.08	0.21695	0.51695			2848.08	0.220854	0.820854		2848.08	0.212948	1.11295			2848.08	0.235002	1.435
2847.12	0.202929		2847.12	0.209897	0.509897			2847.12	0.213647	0.813647		2847.12	0.202503	1.1025			2847.12	0.228151	1.42815
2846.16	0.186719		2846.16	0.190994	0.490994			2846.16	0.195007	0.795007		2846.16	0.182015	1.08201			2846.16	0.206732	1.40673
2845.19	0.166584		2845.19	0.168025	0.468025			2845.19	0.172217	0.772217		2845.19	0.158962	1.05896			2845.19	0.180363	1.38036
2844.23	0.146759		2844.23	0.146277	0.446277			2844.23	0.150315	0.750315		2844.23	0.137765	1.03777			2844.23	0.155505	1.3555
2843.26	0.129052		2843.26	0.12762	0.42762			2843.26	0.131217	0.731217		2843.26	0.119701	1.0197			2843.26	0.13435	1.33435
2842.3	0.113871		2842.3	0.112147	0.412147			2842.3	0.115142	0.715142		2842.3	0.104688	1.00469			2842.3	0.116956	1.31696
2841.34	0.101126		2841.34	0.099465	0.399465			2841.34	0.101793	0.701793		2841.34	0.092346	0.992346			2841.34	0.102792	1.30279
2840.37	0.090535		2840.37	0.089115	0.389115			2840.37	0.090787	0.690787		2840.37	0.082241	0.982241			2840.37	0.091258	1.29126
2839.41	0.08176		2839.41	0.080633	0.380633			2839.41	0.081759	0.681759		2839.41	0.073958	0.973958			2839.41	0.081865	1.28187
2838.44	0.074513		2838.44	0.073641	0.373641			2838.44	0.074366	0.674366		2838.44	0.067165	0.967165			2838.44	0.074245	1.27425
2837.48	0.068518		2837.48	0.067835	0.367835			2837.48	0.068236	0.668236		2837.48	0.061545	0.961545			2837.48	0.067999	1.268
2836.51	0.063509		2836.51	0.062964	0.362964			2836.51	0.063062	0.663062		2836.51	0.056803	0.956803			2836.51	0.062736	1.26274
2835.55	0.059227		2835.55	0.058798	0.358798			2835.55	0.058638	0.658638		2835.55	0.052721	0.952721			2835.55	0.058205	1.25821
2834.59	0.055517		2834.59	0.055215	0.355215			2834.59	0.054854	0.654854		2834.59	0.04922	0.94922			2834.59	0.054319	1.25432
2833.62	0.052336		2833.62	0.052138	0.352138			2833.62	0.051615	0.651615		2833.62	0.046231	0.946231			2833.62	0.050982	1.25098
2832.66	0.049602		2832.66	0.049458	0.349458			2832.66	0.048793	0.648793		2832.66	0.043609	0.943609			2832.66	0.048037	1.24804
2831.69	0.047199		2831.69	0.04711	0.34711			2831.69	0.046296	0.646296		2831.69	0.041267	0.941267			2831.69	0.045395	1.2454
2830.73	0.045054		2830.73	0.045031	0.345031			2830.73	0.044076	0.644076		2830.73	0.039212	0.939212			2830.73	0.043064	1.24306
2829.77	0.043101		2829.77	0.043132	0.343132			2829.77	0.042097	0.642097		2829.77	0.037413	0.937413			2829.77	0.041024	1.24102
2828.8	0.041339		2828.8	0.041401	0.341401			2828.8	0.040327	0.640327		2828.8	0.035794	0.935794			2828.8	0.039208	1.23921
2827.84	0.039783		2827.84	0.039853	0.339853			2827.84	0.038724	0.638724		2827.84	0.034293	0.934293			2827.84	0.037564	1.23756
2826.87	0.038353		2826.87	0.038416	0.338416			2826.87	0.037229	0.637229		2826.87	0.032887	0.932887			2826.87	0.03604	1.23604
2825.91	0.036952		2825.91	0.037029	0.337029			2825.91	0.035812	0.635812		2825.91	0.03156	0.93156			2825.91	0.034573	1.23457
2824.94	0.035618		2824.94	0.035728	0.335728			2824.94	0.034486	0.634486		2824.94	0.030288	0.930288			2824.94	0.033149	1.23315
2823.98	0.034426		2823.98	0.03456	0.33456			2823.98	0.033278	0.633278		2823.98	0.029122	0.929122			2823.98	0.03185	1.23185
2823.02	0.033363		2823.02	0.033511	0.333511			2823.02	0.032198	0.632198		2823.02	0.028117	0.928117			2823.02	0.030745	1.23074
2822.05	0.032386		2822.05	0.03254	0.33254			2822.05	0.031217	0.631217		2822.05	0.027214	0.927214			2822.05	0.029766	1.22977
2821.09	0.031478		2821.09	0.031623	0.331623			2821.09	0.030288	0.630288		2821.09	0.026334	0.926334			2821.09	0.028825	1.22883
2820.12	0.030628		2820.12	0.030754	0.330754			2820.12	0.029394	0.629394		2820.12	0.025476	0.925476			2820.12	0.027922	1.22792
2819.16	0.029821		2819.16	0.029944	0.329944			2819.16	0.028556	0.628556		2819.16	0.024686	0.924686			2819.16	0.027092	1.22709
2818.2	0.029043		2818.2	0.029188	0.329188			2818.2	0.02777	0.62777		2818.2	0.023996	0.923996			2818.2	0.026338	1.22634
2817.23	0.028285		2817.23	0.02846	0.32846			2817.23	0.027019	0.627019		2817.23	0.023374	0.923374			2817.23	0.025639	1.22564
2816.27	0.027577		2816.27	0.027774	0.327774			2816.27	0.02631	0.62631		2816.27	0.022771	0.922771			2816.27	0.024981	1.22498
2815.3	0.026941		2815.3	0.027157	0.327157			2815.3	0.02567	0.62567		2815.3	0.022182	0.922182			2815.3	0.024344	1.22434
2814.34	0.026347		2814.34	0.02659	0.32659			2814.34	0.025091	0.625091		2814.34	0.021605	0.921605			2814.34	0.023716	1.22372
2813.37	0.025759		2813.37	0.026029	0.326029			2813.37	0.024524	0.624524		2813.37	0.021038	0.921038			2813.37	0.023118	1.22312
2812.41	0.025181		2812.41	0.025476	0.325476			2812.41	0.023953	0.623953		2812.41	0.020491	0.920491			2812.41	0.022546	1.22255
2811.45	0.02463		2811.45	0.024953	0.324953			2811.45	0.023402	0.623402		2811.45	0.019974	0.919974			2811.45	0.021964	1.22196
2810.48	0.024101		2810.48	0.024452	0.324452			2810.48	0.022877	0.622877		2810.48	0.019486	0.919486			2810.48	0.021378	1.22138
2809.52	0.023595		2809.52	0.023957	0.323957			2809.52	0.022381	0.622381		2809.52	0.019026	0.919026			2809.52	0.020829	1.22083
2808.55	0.02315		2808.55	0.023495	0.323495			2808.55	0.021943	0.621943		2808.55	0.018616	0.918616			2808.55	0.020331	1.22033
2807.59	0.022782		2807.59	0.023082	0.323082			2807.59	0.021555	0.621555		2807.59	0.018243	0.918243			2807.59	0.019883	1.21988
2806.63	0.022424		2806.63	0.022682	0.322682			2806.63	0.021171	0.621171		2806.63	0.017883	0.917883			2806.63	0.019489	1.21949
2805.66	0.022027		2805.66	0.022257	0.322257			2805.66	0.020769	0.620769		2805.66	0.017519	0.917519			2805.66	0.01911	1.21911
2804.7	0.021619		2804.7	0.021841	0.321841			2804.7	0.020352	0.620352		2804.7	0.01713	0.91713			2804.7	0.018693	1.21869
2803.73	0.021234		2803.73	0.021486	0.321486			2803.73	0.019944	0.619944		2803.73	0.016744	0.916744			2803.73	0.01827	1.21827
2802.77	0.020873		2802.77	0.021174	0.321174			2802.77	0.019586	0.619586		2802.77	0.016391	0.916391			2802.77	0.017885	1.21788
2801.81	0.02051		2801.81	0.020829	0.320829			2801.81	0.019266	0.619266		2801.81	0.016034	0.916034			2801.81	0.017507	1.21751
2800.84	0.020144		2800.84	0.02044	0.32044			2800.84	0.018937	0.618937		2800.84	0.015673	0.915673			2800.84	0.017129	1.21713
2799.88	0.019809		2799.88	0.020065	0.320065			2799.88	0.018585	0.618585		2799.88	0.015334	0.915334			2799.88	0.016782	1.21678
2798.91	0.019487		2798.91	0.019716	0.319716			2798.91	0.018222	0.618222		2798.91	0.015017	0.915017			2798.91	0.016457	1.21646
2797.95	0.019155		2797.95	0.019391	0.319391			2797.95	0.017881	0.617881		2797.95	0.014742	0.914742			2797.95	0.016152	1.21615
2796.98	0.01884		2796.98	0.019095	0.319095			2796.98	0.017584	0.617584		2796.98	0.014519	0.914519			2796.98	0.015876	1.21588
2796.02	0.01857		2796.02	0.018808	0.318808			2796.02	0.017318	0.617318		2796.02	0.014293	0.914293			2796.02	0.015604	1.2156
2795.06	0.018325		2795.06	0.018519	0.318519			2795.06	0.017058	0.617058		2795.06	0.014025	0.914025			2795.06	0.015305	1.2153
2794.09	0.018061		2794.09	0.018224	0.318224			2794.09	0.016778	0.616778		2794.09	0.013739	0.913739			2794.09	0.014994	1.21499
2793.13	0.017777		2793.13	0.017931	0.317931			2793.13	0.016475	0.616475		2793.13	0.013464	0.913464			2793.13	0.014687	1.21469
2792.16	0.017493		2792.16	0.017667	0.317667			2792.16	0.016169	0.616169		2792.16	0.013196	0.913196			2792.16	0.014384	1.21438
2791.2	0.017201		2791.2	0.017412	0.317412			2791.2	0.015871	0.615871		2791.2	0.012926	0.912926			2791.2	0.014093	1.21409
2790.24	0.016908		2790.24	0.017133	0.317133			2790.24	0.015599	0.615599		2790.24	0.012651	0.912651			2790.24	0.013791	1.21379
2789.27	0.016618		2789.27	0.016846	0.316846			2789.27	0.01535	0.61535		2789.27	0.012367	0.912367			2789.27	0.013459	1.21346
2788.31	0.016331		2788.31	0.016564	0.316564			2788.31	0.015107	0.615107		2788.31	0.012115	0.912115			2788.31	0.013142	1.21314
2787.34	0.016075		2787.34	0.016283	0.316283			2787.34	0.014872	0.614872		2787.34	0.011889	0.911889			2787.34	0.01285	1.21285
2786.38	0.015851		2786.38	0.016019	0.316019			2786.38	0.01464	0.61464		2786.38	0.011638	0.911638			2786.38	0.012566	1.21257
2785.41	0.015612		2785.41	0.015766	0.315766			2785.41	0.014385	0.614385		2785.41	0.011375	0.911375			2785.41	0.012294	1.21229
2784.45	0.015327		2784.45	0.015484	0.315484			2784.45	0.014093	0.614093		2784.45	0.011117	0.911117			2784.45	0.012016	1.21202
2783.49	0.015045		2783.49	0.015199	0.315199			2783.49	0.013814	0.613814		2783.49	0.010873	0.910873			2783.49	0.01174	1.21174
2782.52	0.014815		2782.52	0.014959	0.314959			2782.52	0.013589	0.613589		2782.52	0.010662	0.910662			2782.52	0.011493	1.21149
2781.56	0.014604		2781.56	0.014741	0.314741			2781.56	0.013383	0.613383		2781.56	0.010482	0.910482			2781.56	0.011253	1.21125
2780.59	0.014403		2780.59	0.014528	0.314528			2780.59	0.013186	0.613186		2780.59	0.010333	0.910333			2780.59	0.011045	1.21104
2779.63	0.014207		2779.63	0.014315	0.314315			2779.63	0.012994	0.612994		2779.63	0.010173	0.910173			2779.63	0.010881	1.21088
2778.67	0.013977		2778.67	0.014064	0.314064			2778.67	0.012773	0.612773		2778.67	0.009927	0.909927			2778.67	0.010657	1.21066
2777.7	0.01374		2777.7	0.013809	0.313809			2777.7	0.012541	0.612541		2777.7	0.009631	0.909631			2777.7	0.010358	1.21036
2776.74	0.013529		2776.74	0.013603	0.313603			2776.74	0.012321	0.612321		2776.74	0.009373	0.909373			2776.74	0.010084	1.21008
2775.77	0.013306		2775.77	0.013419	0.313419			2775.77	0.012093	0.612093		2775.77	0.009179	0.909179			2775.77	0.009874	1.20987
2774.81	0.013075		2774.81	0.013218	0.313218			2774.81	0.011864	0.611864		2774.81	0.009026	0.909026			2774.81	0.009708	1.20971
2773.84	0.012884		2773.84	0.013002	0.313002			2773.84	0.011656	0.611656		2773.84	0.008877	0.908877			2773.84	0.009551	1.20955
2772.88	0.01273		2772.88	0.012796	0.312796			2772.88	0.01147	0.61147		2772.88	0.008724	0.908724			2772.88	0.00938	1.20938
2771.92	0.012574		2771.92	0.01262	0.31262			2771.92	0.011302	0.611302		2771.92	0.008583	0.908583			2771.92	0.009218	1.20922
2770.95	0.012394		2770.95	0.012463	0.312463			2770.95	0.01116	0.61116		2770.95	0.00845	0.90845			2770.95	0.009083	1.20908
2769.99	0.012208		2769.99	0.012329	0.312329			2769.99	0.011041	0.611041		2769.99	0.008329	0.908329			2769.99	0.008959	1.20896
2769.02	0.01204		2769.02	0.012211	0.312211			2769.02	0.010918	0.610918		2769.02	0.008229	0.908229			2769.02	0.008817	1.20882
2768.06	0.011904		2768.06	0.012097	0.312097			2768.06	0.010792	0.610792		2768.06	0.008122	0.908122			2768.06	0.008652	1.20865
2767.1	0.011815		2767.1	0.012011	0.312011			2767.1	0.010706	0.610706		2767.1	0.007995	0.907995			2767.1	0.008493	1.20849
2766.13	0.011743		2766.13	0.011945	0.311945			2766.13	0.010634	0.610634		2766.13	0.007875	0.907875			2766.13	0.008361	1.20836
2765.17	0.011646		2765.17	0.011843	0.311843			2765.17	0.010509	0.610509		2765.17	0.007786	0.907786			2765.17	0.008256	1.20826
2764.2	0.011553		2764.2	0.011714	0.311714			2764.2	0.010365	0.610365		2764.2	0.007718	0.907718			2764.2	0.008159	1.20816
2763.24	0.011457		2763.24	0.011569	0.311569			2763.24	0.010248	0.610248		2763.24	0.007632	0.907632			2763.24	0.008044	1.20804
2762.28	0.011317		2762.28	0.011401	0.311401			2762.28	0.010123	0.610123		2762.28	0.00752	0.90752			2762.28	0.00791	1.20791
2761.31	0.01118		2761.31	0.011263	0.311263			2761.31	0.009995	0.609995		2761.31	0.007415	0.907415			2761.31	0.007794	1.20779
2760.35	0.011073		2760.35	0.011176	0.311176			2760.35	0.009883	0.609883		2760.35	0.007316	0.907316			2760.35	0.007706	1.20771
2759.38	0.010972		2759.38	0.011084	0.311084			2759.38	0.009773	0.609773		2759.38	0.007218	0.907218			2759.38	0.007622	1.20762
2758.42	0.010912		2758.42	0.010996	0.310996			2758.42	0.009728	0.609728		2758.42	0.007172	0.907172			2758.42	0.007579	1.20758
2757.45	0.010882		2757.45	0.010932	0.310932			2757.45	0.009738	0.609738		2757.45	0.007153	0.907153			2757.45	0.007567	1.20757
2756.49	0.010766		2756.49	0.010816	0.310816			2756.49	0.009649	0.609649		2756.49	0.007034	0.907034			2756.49	0.00746	1.20746
2755.53	0.010584		2755.53	0.010657	0.310657			2755.53	0.009461	0.609461		2755.53	0.006843	0.906843			2755.53	0.007267	1.20727
2754.56	0.01044		2754.56	0.010547	0.310547			2754.56	0.009314	0.609314		2754.56	0.006709	0.906709			2754.56	0.007113	1.20711
2753.6	0.010321		2753.6	0.010451	0.310451			2753.6	0.0092	0.6092		2753.6	0.006632	0.906632			2753.6	0.007008	1.20701
2752.63	0.010202		2752.63	0.010322	0.310322			2752.63	0.009066	0.609066		2752.63	0.006559	0.906559			2752.63	0.006928	1.20693
2751.67	0.010097		2751.67	0.010195	0.310195			2751.67	0.008951	0.608951		2751.67	0.00649	0.90649			2751.67	0.006862	1.20686
2750.71	0.010013		2750.71	0.010088	0.310088			2750.71	0.008892	0.608892		2750.71	0.006436	0.906436			2750.71	0.006806	1.20681
2749.74	0.009954		2749.74	0.01001	0.31001			2749.74	0.00886	0.60886		2749.74	0.006418	0.906418			2749.74	0.006785	1.20678
2748.78	0.009907		2748.78	0.009979	0.309979			2748.78	0.008819	0.608819		2748.78	0.006418	0.906418			2748.78	0.006768	1.20677
2747.81	0.009858		2747.81	0.009959	0.309959			2747.81	0.008757	0.608757		2747.81	0.006395	0.906395			2747.81	0.006718	1.20672
2746.85	0.009816		2746.85	0.00993	0.30993			2746.85	0.008689	0.608689		2746.85	0.006345	0.906345			2746.85	0.006647	1.20665
2745.88	0.009783		2745.88	0.009911	0.309911			2745.88	0.008655	0.608655		2745.88	0.006268	0.906268			2745.88	0.006564	1.20656
2744.92	0.00978		2744.92	0.009928	0.309928			2744.92	0.008688	0.608688		2744.92	0.00622	0.90622			2744.92	0.006528	1.20653
2743.96	0.009816		2743.96	0.009969	0.309969			2743.96	0.008753	0.608753		2743.96	0.006267	0.906267			2743.96	0.006585	1.20659
2742.99	0.009837		2742.99	0.009971	0.309971			2742.99	0.008757	0.608757		2742.99	0.006344	0.906344			2742.99	0.006652	1.20665
2742.03	0.009799		2742.03	0.009889	0.309889			2742.03	0.008661	0.608661		2742.03	0.006335	0.906335			2742.03	0.006621	1.20662
2741.06	0.009711		2741.06	0.009776	0.309776			2741.06	0.008538	0.608538		2741.06	0.006228	0.906228			2741.06	0.006486	1.20649
2740.1	0.009628		2740.1	0.009724	0.309724			2740.1	0.008478	0.608478		2740.1	0.00613	0.90613			2740.1	0.006378	1.20638
2739.14	0.00957		2739.14	0.009701	0.309701			2739.14	0.008466	0.608466		2739.14	0.006106	0.906106			2739.14	0.006374	1.20637
2738.17	0.009487		2738.17	0.009601	0.309601			2738.17	0.008418	0.608418		2738.17	0.006081	0.906081			2738.17	0.006367	1.20637
2737.21	0.009392		2737.21	0.009481	0.309481			2737.21	0.008342	0.608342		2737.21	0.006045	0.906045			2737.21	0.006316	1.20632
2736.24	0.009377		2736.24	0.009478	0.309478			2736.24	0.008329	0.608329		2736.24	0.006093	0.906093			2736.24	0.006324	1.20632
2735.28	0.009396		2735.28	0.009522	0.309522			2735.28	0.008356	0.608356		2735.28	0.006143	0.906143			2735.28	0.006348	1.20635
2734.31	0.009303		2734.31	0.00943	0.30943			2734.31	0.008289	0.608289		2734.31	0.006023	0.906023			2734.31	0.006237	1.20624
2733.35	0.00914		2733.35	0.009264	0.309264			2733.35	0.008137	0.608137		2733.35	0.005805	0.905805			2733.35	0.006028	1.20603
2732.39	0.009035		2732.39	0.009167	0.309167			2732.39	0.008011	0.608011		2732.39	0.005638	0.905638			2732.39	0.005849	1.20585
2731.42	0.008976		2731.42	0.009104	0.309104			2731.42	0.007926	0.607926		2731.42	0.005527	0.905527			2731.42	0.005731	1.20573
2730.46	0.008916		2730.46	0.009031	0.309031			2730.46	0.007871	0.607871		2730.46	0.005461	0.905461			2730.46	0.005686	1.20569
2729.49	0.008897		2729.49	0.009006	0.309006			2729.49	0.007872	0.607872		2729.49	0.005496	0.905496			2729.49	0.005736	1.20574
2728.53	0.008929		2728.53	0.009014	0.309014			2728.53	0.007893	0.607893		2728.53	0.005577	0.905577			2728.53	0.0058	1.2058
2727.57	0.008882		2727.57	0.008927	0.308927			2727.57	0.007816	0.607816		2727.57	0.00552	0.90552			2727.57	0.005703	1.2057
2726.6	0.008723		2726.6	0.008765	0.308765			2726.6	0.007667	0.607667		2726.6	0.005351	0.905351			2726.6	0.005493	1.20549
2725.64	0.008587		2725.64	0.008653	0.308653			2725.64	0.007579	0.607579		2725.64	0.005232	0.905232			2725.64	0.005357	1.20536
2724.67	0.008498		2724.67	0.008564	0.308564			2724.67	0.007516	0.607516		2724.67	0.005162	0.905162			2724.67	0.005301	1.2053
2723.71	0.00843		2723.71	0.008486	0.308486			2723.71	0.007428	0.607428		2723.71	0.005113	0.905113			2723.71	0.005283	1.20528
2722.75	0.008414		2722.75	0.008474	0.308474			2722.75	0.007392	0.607392		2722.75	0.005075	0.905075			2722.75	0.005283	1.20528
2721.78	0.008422		2721.78	0.008479	0.308479			2721.78	0.007406	0.607406		2721.78	0.005021	0.905021			2721.78	0.005253	1.20525
2720.82	0.008388		2720.82	0.008427	0.308427			2720.82	0.007388	0.607388		2720.82	0.004985	0.904985			2720.82	0.005196	1.2052
2719.85	0.00831		2719.85	0.008334	0.308334			2719.85	0.007314	0.607314		2719.85	0.004972	0.904972			2719.85	0.005163	1.20516
2718.89	0.008238		2718.89	0.008278	0.308278			2718.89	0.007245	0.607245		2718.89	0.004949	0.904949			2718.89	0.005151	1.20515
2717.92	0.008163		2717.92	0.008246	0.308246			2717.92	0.007193	0.607193		2717.92	0.004884	0.904884			2717.92	0.005086	1.20509
2716.96	0.008056		2716.96	0.008172	0.308172			2716.96	0.007101	0.607101		2716.96	0.004772	0.904772			2716.96	0.004952	1.20495
2716	0.00799		2716	0.008108	0.308108			2716	0.007013	0.607013		2716	0.004717	0.904717			2716	0.004878	1.20488
2715.03	0.008047		2715.03	0.008141	0.308141			2715.03	0.00704	0.60704		2715.03	0.004861	0.904861			2715.03	0.004989	1.20499
2714.07	0.008145		2714.07	0.00819	0.30819			2714.07	0.007125	0.607125		2714.07	0.005044	0.905044			2714.07	0.005145	1.20514
2713.1	0.008102		2713.1	0.008104	0.308104			2713.1	0.007075	0.607075		2713.1	0.004957	0.904957			2713.1	0.005084	1.20508
2712.14	0.007932		2712.14	0.007929	0.307929			2712.14	0.006902	0.606902		2712.14	0.00472	0.90472			2712.14	0.004872	1.20487
2711.18	0.007802		2711.18	0.007825	0.307825			2711.18	0.006786	0.606786		2711.18	0.004661	0.904661			2711.18	0.004774	1.20477
2710.21	0.007764		2710.21	0.007808	0.307808			2710.21	0.006766	0.606766		2710.21	0.004735	0.904735			2710.21	0.004797	1.2048
2709.25	0.007751		2709.25	0.00777	0.30777			2709.25	0.006753	0.606753		2709.25	0.004702	0.904702			2709.25	0.004764	1.20476
2708.28	0.007701		2708.28	0.007677	0.307677			2708.28	0.006705	0.606705		2708.28	0.004547	0.904547			2708.28	0.004654	1.20465
2707.32	0.007615		2707.32	0.007593	0.307593			2707.32	0.006635	0.606635		2707.32	0.004423	0.904423			2707.32	0.004564	1.20456
2706.35	0.007521		2706.35	0.007525	0.307525			2706.35	0.006551	0.606551		2706.35	0.004365	0.904365			2706.35	0.0045	1.2045
2705.39	0.007442		2705.39	0.007458	0.307458			2705.39	0.006472	0.606472		2705.39	0.004322	0.904322			2705.39	0.004433	1.20443
2704.43	0.007412		2704.43	0.007439	0.307439			2704.43	0.006449	0.606449		2704.43	0.00431	0.90431			2704.43	0.004389	1.20439
2703.46	0.007466		2703.46	0.007505	0.307505			2703.46	0.00651	0.60651		2703.46	0.004391	0.904391			2703.46	0.004441	1.20444
2702.5	0.007555		2702.5	0.007601	0.307601			2702.5	0.00659	0.60659		2702.5	0.004542	0.904542			2702.5	0.004575	1.20457
2701.53	0.007547		2701.53	0.007586	0.307586			2701.53	0.006569	0.606569		2701.53	0.004549	0.904549			2701.53	0.004579	1.20458
2700.57	0.007392		2700.57	0.0074	0.3074			2700.57	0.006421	0.606421		2700.57	0.004305	0.904305			2700.57	0.004345	1.20434
2699.61	0.007198		2699.61	0.007179	0.307179			2699.61	0.006252	0.606252		2699.61	0.004031	0.904031			2699.61	0.004085	1.20408
2698.64	0.007067		2698.64	0.007055	0.307055			2698.64	0.00614	0.60614		2698.64	0.003913	0.903913			2698.64	0.003994	1.20399
2697.68	0.007002		2697.68	0.006999	0.306999			2697.68	0.006069	0.606069		2697.68	0.003907	0.903907			2697.68	0.004033	1.20403
2696.71	0.006976		2696.71	0.00694	0.30694			2696.71	0.006005	0.606005		2696.71	0.003906	0.903906			2696.71	0.00407	1.20407
2695.75	0.006993		2695.75	0.006915	0.306915			2695.75	0.005976	0.605976		2695.75	0.00389	0.90389			2695.75	0.004042	1.20404
2694.79	0.007069		2694.79	0.006996	0.306996			2694.79	0.006027	0.606027		2694.79	0.003972	0.903972			2694.79	0.004049	1.20405
2693.82	0.007208		2693.82	0.007183	0.307183			2693.82	0.006159	0.606159		2693.82	0.004244	0.904244			2693.82	0.004228	1.20423
2692.86	0.007318		2692.86	0.007339	0.307339			2692.86	0.006276	0.606276		2692.86	0.004507	0.904507			2692.86	0.00443	1.20443
2691.89	0.007296		2691.89	0.007307	0.307307			2691.89	0.006283	0.606283		2691.89	0.004487	0.904487			2691.89	0.004407	1.20441
2690.93	0.007211		2690.93	0.007179	0.307179			2690.93	0.006239	0.606239		2690.93	0.004333	0.904333			2690.93	0.004271	1.20427
2689.96	0.007122		2689.96	0.00706	0.30706			2689.96	0.006173	0.606173		2689.96	0.004209	0.904209			2689.96	0.004146	1.20415
2689	0.006973		2689	0.006874	0.306874			2689	0.006017	0.606017		2689	0.004013	0.904013			2689	0.003939	1.20394
2688.04	0.00682		2688.04	0.006683	0.306683			2688.04	0.005847	0.605847		2688.04	0.003818	0.903818			2688.04	0.003726	1.20373
2687.07	0.006749		2687.07	0.006603	0.306603			2687.07	0.005774	0.605774		2687.07	0.003737	0.903737			2687.07	0.003621	1.20362
2686.11	0.006716		2686.11	0.006588	0.306588			2686.11	0.005789	0.605789		2686.11	0.0037	0.9037			2686.11	0.003594	1.20359
2685.14	0.00668		2685.14	0.006583	0.306583			2685.14	0.005826	0.605826		2685.14	0.003659	0.903659			2685.14	0.003614	1.20361
2684.18	0.006675		2684.18	0.006592	0.306592			2684.18	0.005842	0.605842		2684.18	0.003639	0.903639			2684.18	0.003648	1.20365
2683.22	0.006731		2683.22	0.006627	0.306627			2683.22	0.005857	0.605857		2683.22	0.003691	0.903691			2683.22	0.003686	1.20369
2682.25	0.00683		2682.25	0.006689	0.306689			2682.25	0.005903	0.605903		2682.25	0.003817	0.903817			2682.25	0.003761	1.20376
2681.29	0.006918		2681.29	0.006744	0.306744			2681.29	0.005959	0.605959		2681.29	0.003928	0.903928			2681.29	0.003841	1.20384
2680.32	0.00693		2680.32	0.006736	0.306736			2680.32	0.005964	0.605964		2680.32	0.003917	0.903917			2680.32	0.003823	1.20382
2679.36	0.006828		2679.36	0.006648	0.306648			2679.36	0.005875	0.605875		2679.36	0.003802	0.903802			2679.36	0.003715	1.20371
2678.39	0.0067		2678.39	0.006564	0.306564			2678.39	0.005767	0.605767		2678.39	0.003714	0.903714			2678.39	0.003651	1.20365
2677.43	0.006674		2677.43	0.00658	0.30658			2677.43	0.005752	0.605752		2677.43	0.003727	0.903727			2677.43	0.003685	1.20368
2676.47	0.006748		2676.47	0.006649	0.306649			2676.47	0.005817	0.605817		2676.47	0.003809	0.903809			2676.47	0.003769	1.20377
2675.5	0.006839		2675.5	0.00671	0.30671			2675.5	0.00588	0.60588		2675.5	0.003916	0.903916			2675.5	0.003878	1.20388
2674.54	0.006949		2674.54	0.006819	0.306819			2674.54	0.005965	0.605965		2674.54	0.004103	0.904103			2674.54	0.004078	1.20408
2673.57	0.007069		2673.57	0.006961	0.306961			2673.57	0.006089	0.606089		2673.57	0.004328	0.904328			2673.57	0.004309	1.20431
2672.61	0.007076		2672.61	0.006963	0.306963			2672.61	0.006116	0.606116		2672.61	0.004357	0.904357			2672.61	0.004342	1.20434
2671.65	0.006953		2671.65	0.006817	0.306817			2671.65	0.006006	0.606006		2671.65	0.004204	0.904204			2671.65	0.00419	1.20419
2670.68	0.006855		2670.68	0.006726	0.306726			2670.68	0.00592	0.60592		2670.68	0.004118	0.904118			2670.68	0.004093	1.20409
2669.72	0.006875		2669.72	0.006786	0.306786			2669.72	0.005961	0.605961		2669.72	0.004184	0.904184			2669.72	0.004156	1.20416
2668.75	0.006988		2668.75	0.006957	0.306957			2668.75	0.006089	0.606089		2668.75	0.00432	0.90432			2668.75	0.004308	1.20431
2667.79	0.00708		2667.79	0.007099	0.307099			2667.79	0.006182	0.606182		2667.79	0.004389	0.904389			2667.79	0.004397	1.2044
2666.82	0.007051		2666.82	0.007081	0.307081			2666.82	0.006165	0.606165		2666.82	0.004334	0.904334			2666.82	0.004351	1.20435
2665.86	0.006991		2665.86	0.007006	0.307006			2665.86	0.006127	0.606127		2665.86	0.004273	0.904273			2665.86	0.004307	1.20431
2664.9	0.006989		2664.9	0.006979	0.306979			2664.9	0.006138	0.606138		2664.9	0.004264	0.904264			2664.9	0.004332	1.20433
2663.93	0.00696		2663.93	0.00692	0.30692			2663.93	0.006125	0.606125		2663.93	0.004226	0.904226			2663.93	0.004319	1.20432
2662.97	0.006886		2662.97	0.006843	0.306843			2662.97	0.006065	0.606065		2662.97	0.004162	0.904162			2662.97	0.004269	1.20427
2662	0.006865		2662	0.00685	0.30685			2662	0.006039	0.606039		2662	0.004137	0.904137			2662	0.004262	1.20426
2661.04	0.006922		2661.04	0.006907	0.306907			2661.04	0.006101	0.606101		2661.04	0.004159	0.904159			2661.04	0.004287	1.20429
2660.08	0.006975		2660.08	0.006931	0.306931			2660.08	0.006186	0.606186		2660.08	0.00417	0.90417			2660.08	0.00428	1.20428
2659.11	0.006956		2659.11	0.006915	0.306915			2659.11	0.006203	0.606203		2659.11	0.00413	0.90413			2659.11	0.004223	1.20422
2658.15	0.006883		2658.15	0.006885	0.306885			2658.15	0.006152	0.606152		2658.15	0.004077	0.904077			2658.15	0.004161	1.20416
2657.18	0.006833		2657.18	0.006844	0.306844			2657.18	0.006101	0.606101		2657.18	0.004059	0.904059			2657.18	0.004129	1.20413
2656.22	0.006898		2656.22	0.006871	0.306871			2656.22	0.006127	0.606127		2656.22	0.004187	0.904187			2656.22	0.00423	1.20423
2655.26	0.007064		2655.26	0.007003	0.307003			2655.26	0.006228	0.606228		2655.26	0.004464	0.904464			2655.26	0.004477	1.20448
2654.29	0.007151		2654.29	0.007046	0.307046			2654.29	0.006252	0.606252		2654.29	0.004588	0.904588			2654.29	0.004579	1.20458
2653.33	0.007074		2653.33	0.00692	0.30692			2653.33	0.006156	0.606156		2653.33	0.00444	0.90444			2653.33	0.004444	1.20444
2652.36	0.007005		2652.36	0.006858	0.306858			2652.36	0.006101	0.606101		2652.36	0.004375	0.904375			2652.36	0.004434	1.20443
2651.4	0.007049		2651.4	0.00696	0.30696			2651.4	0.006161	0.606161		2651.4	0.00455	0.90455			2651.4	0.00467	1.20467
2650.43	0.007052		2650.43	0.007003	0.307003			2650.43	0.006197	0.606197		2650.43	0.004625	0.904625			2650.43	0.004762	1.20476
2649.47	0.006894		2649.47	0.006855	0.306855			2649.47	0.006111	0.606111		2649.47	0.004406	0.904406			2649.47	0.004527	1.20453
2648.51	0.006709		2648.51	0.006683	0.306683			2648.51	0.005996	0.605996		2648.51	0.004105	0.904105			2648.51	0.004236	1.20424
2647.54	0.006633		2647.54	0.006621	0.306621			2647.54	0.005938	0.605938		2647.54	0.00391	0.90391			2647.54	0.004072	1.20407
2646.58	0.00664		2646.58	0.006633	0.306633			2646.58	0.00591	0.60591		2646.58	0.003876	0.903876			2646.58	0.004019	1.20402
2645.61	0.006702		2645.61	0.006712	0.306712			2645.61	0.005933	0.605933		2645.61	0.004068	0.904068			2645.61	0.004125	1.20412
2644.65	0.006806		2644.65	0.006838	0.306838			2644.65	0.006021	0.606021		2644.65	0.004369	0.904369			2644.65	0.004355	1.20436
2643.69	0.00683		2643.69	0.006863	0.306863			2643.69	0.006051	0.606051		2643.69	0.004435	0.904435			2643.69	0.004427	1.20443
2642.72	0.006728		2642.72	0.006748	0.306748			2642.72	0.005967	0.605967		2642.72	0.004231	0.904231			2642.72	0.00426	1.20426
2641.76	0.006645		2641.76	0.006651	0.306651			2641.76	0.005906	0.605906		2641.76	0.004067	0.904067			2641.76	0.004125	1.20412
2640.79	0.006653		2640.79	0.006652	0.306652			2640.79	0.005947	0.605947		2640.79	0.004057	0.904057			2640.79	0.004143	1.20414
2639.83	0.006684		2639.83	0.006697	0.306697			2639.83	0.006019	0.606019		2639.83	0.004118	0.904118			2639.83	0.004226	1.20423
2638.86	0.006729		2638.86	0.006762	0.306762			2638.86	0.006073	0.606073		2638.86	0.004242	0.904242			2638.86	0.004368	1.20437
2637.9	0.006813		2637.9	0.006843	0.306843			2637.9	0.00611	0.60611		2637.9	0.004416	0.904416			2637.9	0.004549	1.20455
2636.94	0.006882		2636.94	0.006888	0.306888			2636.94	0.00613	0.60613		2636.94	0.004553	0.904553			2636.94	0.004659	1.20466
2635.97	0.006944		2635.97	0.006937	0.306937			2635.97	0.006182	0.606182		2635.97	0.00466	0.90466			2635.97	0.004734	1.20473
2635.01	0.00702		2635.01	0.007025	0.307025			2635.01	0.006259	0.606259		2635.01	0.004707	0.904707			2635.01	0.004794	1.20479
2634.04	0.006982		2634.04	0.007012	0.307012			2634.04	0.006237	0.606237		2634.04	0.004581	0.904581			2634.04	0.004702	1.2047
2633.08	0.006815		2633.08	0.006887	0.306887			2633.08	0.006124	0.606124		2633.08	0.004388	0.904388			2633.08	0.004495	1.20449
2632.12	0.006661		2632.12	0.006773	0.306773			2632.12	0.006041	0.606041		2632.12	0.004267	0.904267			2632.12	0.00431	1.20431
2631.15	0.006609		2631.15	0.006709	0.306709			2631.15	0.006014	0.606014		2631.15	0.004235	0.904235			2631.15	0.004227	1.20423
2630.19	0.006632		2630.19	0.006683	0.306683			2630.19	0.006004	0.606004		2630.19	0.00424	0.90424			2630.19	0.004252	1.20425
2629.22	0.006584		2629.22	0.006611	0.306611			2629.22	0.005936	0.605936		2629.22	0.004152	0.904152			2629.22	0.004214	1.20421
2628.26	0.006423		2628.26	0.006453	0.306453			2628.26	0.005799	0.605799		2628.26	0.003984	0.903984			2628.26	0.004054	1.20405
2627.29	0.006284		2627.29	0.006303	0.306303			2627.29	0.005656	0.605656		2627.29	0.003873	0.903873			2627.29	0.003905	1.20391
2626.33	0.006213		2626.33	0.006205	0.306205			2626.33	0.005542	0.605542		2626.33	0.003808	0.903808			2626.33	0.003813	1.20381
2625.37	0.006162		2625.37	0.006142	0.306142			2625.37	0.005461	0.605461		2625.37	0.003723	0.903723			2625.37	0.003738	1.20374
2624.4	0.006099		2624.4	0.006081	0.306081			2624.4	0.005401	0.605401		2624.4	0.003633	0.903633			2624.4	0.003675	1.20368
2623.44	0.006021		2623.44	0.005999	0.305999			2623.44	0.005355	0.605355		2623.44	0.003575	0.903575			2623.44	0.003631	1.20363
2622.47	0.005952		2622.47	0.005918	0.305918			2622.47	0.005315	0.605315		2622.47	0.003543	0.903543			2622.47	0.003584	1.20358
2621.51	0.0059		2621.51	0.00586	0.30586			2621.51	0.005252	0.605252		2621.51	0.003509	0.903509			2621.51	0.003513	1.20351
2620.55	0.005857		2620.55	0.005828	0.305828			2620.55	0.005178	0.605178		2620.55	0.003488	0.903488			2620.55	0.003462	1.20346
2619.58	0.005845		2619.58	0.005836	0.305836			2619.58	0.005156	0.605156		2619.58	0.003534	0.903534			2619.58	0.003492	1.20349
2618.62	0.00583		2618.62	0.005839	0.305839			2618.62	0.005148	0.605148		2618.62	0.00358	0.90358			2618.62	0.003514	1.20351
2617.65	0.005749		2617.65	0.00576	0.30576			2617.65	0.005075	0.605075		2617.65	0.003492	0.903492			2617.65	0.003423	1.20342
2616.69	0.005648		2616.69	0.005645	0.305645			2616.69	0.004992	0.604992		2616.69	0.003329	0.903329			2616.69	0.003282	1.20328
2615.73	0.005578		2615.73	0.005591	0.305591			2615.73	0.004971	0.604971		2615.73	0.003266	0.903266			2615.73	0.003203	1.2032
2614.76	0.005553		2614.76	0.005613	0.305613			2614.76	0.00499	0.60499		2614.76	0.003314	0.903314			2614.76	0.003205	1.2032
2613.8	0.00555		2613.8	0.005616	0.305616			2613.8	0.004978	0.604978		2613.8	0.003283	0.903283			2613.8	0.003171	1.20317
2612.83	0.005502		2612.83	0.005522	0.305522			2612.83	0.00489	0.60489		2612.83	0.003107	0.903107			2612.83	0.003034	1.20303
2611.87	0.005405		2611.87	0.005393	0.305393			2611.87	0.00476	0.60476		2611.87	0.002958	0.902958			2611.87	0.002895	1.2029
2610.9	0.005321		2610.9	0.005303	0.305303			2610.9	0.004653	0.604653		2610.9	0.002925	0.902925			2610.9	0.002848	1.20285
2609.94	0.005314		2609.94	0.005292	0.305292			2609.94	0.00462	0.60462		2609.94	0.003011	0.903011			2609.94	0.002937	1.20294
2608.98	0.005357		2608.98	0.005332	0.305332			2608.98	0.004654	0.604654		2608.98	0.003155	0.903155			2608.98	0.003073	1.20307
2608.01	0.005321		2608.01	0.005302	0.305302			2608.01	0.004653	0.604653		2608.01	0.003149	0.903149			2608.01	0.003046	1.20305
2607.05	0.005196		2607.05	0.005194	0.305194			2607.05	0.004576	0.604576		2607.05	0.002955	0.902955			2607.05	0.002867	1.20287
2606.08	0.005094		2606.08	0.005111	0.305111			2606.08	0.004491	0.604491		2606.08	0.002778	0.902778			2606.08	0.002723	1.20272
2605.12	0.005041		2605.12	0.005069	0.305069			2605.12	0.004435	0.604435		2605.12	0.002709	0.902709			2605.12	0.002661	1.20266
2604.16	0.004999		2604.16	0.005024	0.305024			2604.16	0.004384	0.604384		2604.16	0.002665	0.902665			2604.16	0.002627	1.20263
2603.19	0.004961		2603.19	0.004971	0.304971			2603.19	0.004334	0.604334		2603.19	0.002593	0.902593			2603.19	0.002582	1.20258
2602.23	0.004906		2602.23	0.004915	0.304915			2602.23	0.004288	0.604288		2602.23	0.002531	0.902531			2602.23	0.00253	1.20253
2601.26	0.004813		2601.26	0.004849	0.304849			2601.26	0.004235	0.604235		2601.26	0.002506	0.902506			2601.26	0.002505	1.2025
2600.3	0.004746		2600.3	0.004817	0.304817			2600.3	0.004192	0.604192		2600.3	0.002515	0.902515			2600.3	0.002503	1.2025
2599.33	0.004761		2599.33	0.004833	0.304833			2599.33	0.004186	0.604186		2599.33	0.002543	0.902543			2599.33	0.002491	1.20249
2598.37	0.004767		2598.37	0.004815	0.304815			2598.37	0.004186	0.604186		2598.37	0.002518	0.902518			2598.37	0.002432	1.20243
2597.41	0.004687		2597.41	0.004746	0.304746			2597.41	0.004155	0.604155		2597.41	0.002456	0.902456			2597.41	0.002368	1.20237
2596.44	0.004611		2596.44	0.004692	0.304692			2596.44	0.004116	0.604116		2596.44	0.002439	0.902439			2596.44	0.002358	1.20236
2595.48	0.004596		2595.48	0.00467	0.30467			2595.48	0.004084	0.604084		2595.48	0.002426	0.902426			2595.48	0.002345	1.20234
2594.51	0.004589		2594.51	0.004657	0.304657			2594.51	0.004064	0.604064		2594.51	0.002359	0.902359			2594.51	0.002279	1.20228
2593.55	0.004562		2593.55	0.004651	0.304651			2593.55	0.004061	0.604061		2593.55	0.002304	0.902304			2593.55	0.002237	1.20224
2592.59	0.004561		2592.59	0.004659	0.304659			2592.59	0.004075	0.604075		2592.59	0.002356	0.902356			2592.59	0.002302	1.2023
2591.62	0.004568		2591.62	0.004631	0.304631			2591.62	0.004061	0.604061		2591.62	0.00245	0.90245			2591.62	0.002406	1.20241
2590.66	0.004481		2590.66	0.004505	0.304505			2590.66	0.003956	0.603956		2590.66	0.002425	0.902425			2590.66	0.002383	1.20238
2589.69	0.004344		2589.69	0.004374	0.304374			2589.69	0.003819	0.603819		2589.69	0.002305	0.902305			2589.69	0.002244	1.20224
2588.73	0.004285		2588.73	0.004325	0.304325			2588.73	0.00376	0.60376		2588.73	0.002221	0.902221			2588.73	0.002139	1.20214
2587.76	0.004279		2587.76	0.004307	0.304307			2587.76	0.003749	0.603749		2587.76	0.002176	0.902176			2587.76	0.002098	1.2021
2586.8	0.004246		2586.8	0.004261	0.304261			2586.8	0.003714	0.603714		2586.8	0.002152	0.902152			2586.8	0.002064	1.20206
2585.84	0.004194		2585.84	0.004205	0.304205			2585.84	0.003671	0.603671		2585.84	0.00216	0.90216			2585.84	0.002034	1.20203
2584.87	0.004174		2584.87	0.004167	0.304167			2584.87	0.003637	0.603637		2584.87	0.002175	0.902175			2584.87	0.002027	1.20203
2583.91	0.004203		2583.91	0.004159	0.304159			2583.91	0.003615	0.603615		2583.91	0.002167	0.902167			2583.91	0.002029	1.20203
2582.94	0.004216		2582.94	0.004157	0.304157			2582.94	0.003609	0.603609		2582.94	0.002135	0.902135			2582.94	0.002012	1.20201
2581.98	0.004153		2581.98	0.004123	0.304123			2581.98	0.00359	0.60359		2581.98	0.002071	0.902071			2581.98	0.001937	1.20194
2581.02	0.004065		2581.02	0.004057	0.304057			2581.02	0.003547	0.603547		2581.02	0.001979	0.901979			2581.02	0.001832	1.20183
2580.05	0.004015		2580.05	0.003997	0.303997			2580.05	0.003499	0.603499		2580.05	0.001904	0.901904			2580.05	0.001774	1.20177
2579.09	0.003986		2579.09	0.003958	0.303958			2579.09	0.003439	0.603439		2579.09	0.001871	0.901871			2579.09	0.001752	1.20175
2578.12	0.003946		2578.12	0.003934	0.303934			2578.12	0.003361	0.603361		2578.12	0.001857	0.901857			2578.12	0.001723	1.20172
2577.16	0.0039		2577.16	0.003908	0.303908			2577.16	0.003296	0.603296		2577.16	0.001838	0.901838			2577.16	0.001687	1.20169
2576.2	0.003855		2576.2	0.003875	0.303875			2576.2	0.003275	0.603275		2576.2	0.001821	0.901821			2576.2	0.001655	1.20165
2575.23	0.003822		2575.23	0.003841	0.303841			2575.23	0.003298	0.603298		2575.23	0.001824	0.901824			2575.23	0.001653	1.20165
2574.27	0.003807		2574.27	0.003805	0.303805			2574.27	0.003317	0.603317		2574.27	0.001832	0.901832			2574.27	0.00168	1.20168
2573.3	0.003823		2573.3	0.003812	0.303812			2573.3	0.003326	0.603326		2573.3	0.001861	0.901861			2573.3	0.00173	1.20173
2572.34	0.00389		2572.34	0.003893	0.303893			2572.34	0.003364	0.603364		2572.34	0.001951	0.901951			2572.34	0.001801	1.2018
2571.37	0.003933		2571.37	0.003934	0.303934			2571.37	0.003383	0.603383		2571.37	0.002003	0.902003			2571.37	0.001821	1.20182
2570.41	0.003857		2570.41	0.003856	0.303856			2570.41	0.003321	0.603321		2570.41	0.001917	0.901917			2570.41	0.001735	1.20173
2569.45	0.00374		2569.45	0.003752	0.303752			2569.45	0.003231	0.603231		2569.45	0.001787	0.901787			2569.45	0.00161	1.20161
2568.48	0.003688		2568.48	0.00371	0.30371			2568.48	0.003187	0.603187		2568.48	0.001753	0.901753			2568.48	0.001561	1.20156
2567.52	0.003688		2567.52	0.003729	0.303729			2567.52	0.003192	0.603192		2567.52	0.001819	0.901819			2567.52	0.001626	1.20163
2566.55	0.003673		2566.55	0.003747	0.303747			2566.55	0.003198	0.603198		2566.55	0.001858	0.901858			2566.55	0.001692	1.20169
2565.59	0.003621		2565.59	0.003687	0.303687			2565.59	0.003166	0.603166		2565.59	0.001794	0.901794			2565.59	0.001646	1.20165
2564.63	0.003579		2564.63	0.003602	0.303602			2564.63	0.003126	0.603126		2564.63	0.001722	0.901722			2564.63	0.001555	1.20155
2563.66	0.003591		2563.66	0.003579	0.303579			2563.66	0.003116	0.603116		2563.66	0.001739	0.901739			2563.66	0.001549	1.20155
2562.7	0.003634		2562.7	0.003605	0.303605			2562.7	0.003132	0.603132		2562.7	0.001809	0.901809			2562.7	0.001622	1.20162
2561.73	0.003693		2561.73	0.003665	0.303665			2561.73	0.003184	0.603184		2561.73	0.001889	0.901889			2561.73	0.001715	1.20171
2560.77	0.003742		2560.77	0.003744	0.303744			2560.77	0.003253	0.603253		2560.77	0.001958	0.901958			2560.77	0.001778	1.20178
2559.8	0.003704		2559.8	0.003727	0.303727			2559.8	0.003226	0.603226		2559.8	0.001905	0.901905			2559.8	0.001702	1.2017
2558.84	0.003577		2558.84	0.003588	0.303588			2558.84	0.00309	0.60309		2558.84	0.001713	0.901713			2558.84	0.001495	1.20149
2557.88	0.003472		2557.88	0.003463	0.303463			2557.88	0.002988	0.602988		2557.88	0.001576	0.901576			2557.88	0.001369	1.20137
2556.91	0.003449		2556.91	0.003431	0.303431			2556.91	0.00299	0.60299		2556.91	0.001599	0.901599			2556.91	0.001406	1.20141
2555.95	0.00349		2555.95	0.003476	0.303476			2555.95	0.00306	0.60306		2555.95	0.001727	0.901727			2555.95	0.001517	1.20152
2554.98	0.003544		2554.98	0.003549	0.303549			2554.98	0.003139	0.603139		2554.98	0.001887	0.901887			2554.98	0.001644	1.20164
2554.02	0.003539		2554.02	0.003551	0.303551			2554.02	0.003146	0.603146		2554.02	0.001939	0.901939			2554.02	0.001693	1.20169
2553.06	0.003466		2553.06	0.003463	0.303463			2553.06	0.003065	0.603065		2553.06	0.00181	0.90181			2553.06	0.001598	1.2016
2552.09	0.003426		2552.09	0.003399	0.303399			2552.09	0.003006	0.603006		2552.09	0.001676	0.901676			2552.09	0.001503	1.2015
2551.13	0.003461		2551.13	0.003408	0.303408			2551.13	0.00303	0.60303		2551.13	0.001679	0.901679			2551.13	0.001529	1.20153
2550.16	0.003489		2550.16	0.003407	0.303407			2550.16	0.003054	0.603054		2550.16	0.001695	0.901695			2550.16	0.001558	1.20156
2549.2	0.003459		2549.2	0.003358	0.303358			2549.2	0.00301	0.60301		2549.2	0.001616	0.901616			2549.2	0.001489	1.20149
2548.24	0.003415		2548.24	0.003328	0.303328			2548.24	0.002955	0.602955		2548.24	0.001534	0.901534			2548.24	0.001404	1.2014
2547.27	0.00341		2547.27	0.00336	0.30336			2547.27	0.002961	0.602961		2547.27	0.001568	0.901568			2547.27	0.001419	1.20142
2546.31	0.00344		2546.31	0.003412	0.303412			2546.31	0.003001	0.603001		2546.31	0.001695	0.901695			2546.31	0.001524	1.20152
2545.34	0.003448		2545.34	0.003409	0.303409			2545.34	0.003001	0.603001		2545.34	0.001765	0.901765			2545.34	0.001589	1.20159
2544.38	0.003368		2544.38	0.003322	0.303322			2544.38	0.002921	0.602921		2544.38	0.001672	0.901672			2544.38	0.001511	1.20151
2543.41	0.003223		2543.41	0.003194	0.303194			2543.41	0.0028	0.6028		2543.41	0.001479	0.901479			2543.41	0.001326	1.20133
2542.45	0.003109		2542.45	0.003096	0.303096			2542.45	0.002719	0.602719		2542.45	0.001313	0.901313			2542.45	0.001157	1.20116
2541.49	0.003047		2541.49	0.003045	0.303045			2541.49	0.002689	0.602689		2541.49	0.001235	0.901235			2541.49	0.001076	1.20108
2540.52	0.002991		2540.52	0.003	0.303			2540.52	0.002658	0.602658		2540.52	0.001212	0.901212			2540.52	0.001049	1.20105
2539.56	0.002945		2539.56	0.002951	0.302951			2539.56	0.002619	0.602619		2539.56	0.001197	0.901197			2539.56	0.001017	1.20102
2538.59	0.002941		2538.59	0.002933	0.302933			2538.59	0.002586	0.602586		2538.59	0.001194	0.901194			2538.59	0.000983	1.20098
2537.63	0.00297		2537.63	0.002956	0.302956			2537.63	0.002547	0.602547		2537.63	0.001211	0.901211			2537.63	0.000976	1.20098
2536.67	0.002979		2536.67	0.002981	0.302981			2536.67	0.002521	0.602521		2536.67	0.001265	0.901265			2536.67	0.001022	1.20102
2535.7	0.002958		2535.7	0.002978	0.302978			2535.7	0.002541	0.602541		2535.7	0.001343	0.901343			2535.7	0.001099	1.2011
2534.74	0.002925		2534.74	0.002946	0.302946			2534.74	0.002566	0.602566		2534.74	0.001376	0.901376			2534.74	0.001115	1.20111
2533.77	0.002888		2533.77	0.002896	0.302896			2533.77	0.002555	0.602555		2533.77	0.001347	0.901347			2533.77	0.001049	1.20105
2532.81	0.002867		2532.81	0.002859	0.302859			2532.81	0.002528	0.602528		2532.81	0.001302	0.901302			2532.81	0.000987	1.20099
2531.84	0.002869		2531.84	0.002835	0.302835			2531.84	0.002498	0.602498		2531.84	0.001271	0.901271			2531.84	0.000958	1.20096
2530.88	0.002878		2530.88	0.00283	0.30283			2530.88	0.002477	0.602477		2530.88	0.001249	0.901249			2530.88	0.000924	1.20092
2529.92	0.002897		2529.92	0.00286	0.30286			2529.92	0.002489	0.602489		2529.92	0.00122	0.90122			2529.92	0.000892	1.20089
2528.95	0.002927		2528.95	0.002897	0.302897			2528.95	0.002535	0.602535		2528.95	0.001203	0.901203			2528.95	0.00091	1.20091
2527.99	0.002947		2527.99	0.002911	0.302911			2527.99	0.002583	0.602583		2527.99	0.001221	0.901221			2527.99	0.000969	1.20097
2527.02	0.002955		2527.02	0.002911	0.302911			2527.02	0.002602	0.602602		2527.02	0.001244	0.901244			2527.02	0.001	1.201
2526.06	0.002964		2526.06	0.002918	0.302918			2526.06	0.002598	0.602598		2526.06	0.001267	0.901267			2526.06	0.001017	1.20102
2525.1	0.002966		2525.1	0.002924	0.302924			2525.1	0.00259	0.60259		2525.1	0.001324	0.901324			2525.1	0.001056	1.20106
2524.13	0.002961		2524.13	0.00291	0.30291			2524.13	0.002588	0.602588		2524.13	0.001367	0.901367			2524.13	0.001076	1.20108
2523.17	0.002976		2523.17	0.0029	0.3029			2523.17	0.002586	0.602586		2523.17	0.001379	0.901379			2523.17	0.001095	1.2011
2522.2	0.002973		2522.2	0.002898	0.302898			2522.2	0.002554	0.602554		2522.2	0.001387	0.901387			2522.2	0.001131	1.20113
2521.24	0.002893		2521.24	0.002844	0.302844			2521.24	0.002476	0.602476		2521.24	0.001321	0.901321			2521.24	0.001064	1.20106
2520.27	0.002779		2520.27	0.002757	0.302757			2520.27	0.002401	0.602401		2520.27	0.001197	0.901197			2520.27	0.000898	1.2009
2519.31	0.002699		2519.31	0.002708	0.302708			2519.31	0.002365	0.602365		2519.31	0.001123	0.901123			2519.31	0.000801	1.2008
2518.35	0.002661		2518.35	0.002674	0.302674			2518.35	0.002339	0.602339		2518.35	0.00109	0.90109			2518.35	0.000799	1.2008
2517.38	0.002648		2517.38	0.002631	0.302631			2517.38	0.002312	0.602312		2517.38	0.001067	0.901067			2517.38	0.000827	1.20083
2516.42	0.002653		2516.42	0.002608	0.302608			2516.42	0.002308	0.602308		2516.42	0.001092	0.901092			2516.42	0.000866	1.20087
2515.45	0.002655		2515.45	0.002595	0.302595			2515.45	0.002314	0.602314		2515.45	0.001155	0.901155			2515.45	0.0009	1.2009
2514.49	0.002654		2514.49	0.002586	0.302586			2514.49	0.002323	0.602323		2514.49	0.001203	0.901203			2514.49	0.000922	1.20092
2513.53	0.002685		2513.53	0.002614	0.302614			2513.53	0.002344	0.602344		2513.53	0.001225	0.901225			2513.53	0.000935	1.20093
2512.56	0.002715		2512.56	0.002628	0.302628			2512.56	0.002347	0.602347		2512.56	0.001187	0.901187			2512.56	0.000888	1.20089
2511.6	0.002682		2511.6	0.00259	0.30259			2511.6	0.002311	0.602311		2511.6	0.001076	0.901076			2511.6	0.000781	1.20078
2510.63	0.002635		2510.63	0.00256	0.30256			2510.63	0.002282	0.602282		2510.63	0.000997	0.900997			2510.63	0.000705	1.2007
2509.67	0.002623		2509.67	0.002557	0.302557			2509.67	0.002281	0.602281		2509.67	0.001	0.901			2509.67	0.000688	1.20069
2508.71	0.002615		2508.71	0.002552	0.302552			2508.71	0.002282	0.602282		2508.71	0.001008	0.901008			2508.71	0.000672	1.20067
2507.74	0.00261		2507.74	0.00256	0.30256			2507.74	0.002286	0.602286		2507.74	0.000987	0.900987			2507.74	0.000662	1.20066
2506.78	0.002629		2506.78	0.002592	0.302592			2506.78	0.002298	0.602298		2506.78	0.000996	0.900996			2506.78	0.0007	1.2007
2505.81	0.002652		2505.81	0.002626	0.302626			2505.81	0.002301	0.602301		2505.81	0.001047	0.901047			2505.81	0.000768	1.20077
2504.85	0.002631		2504.85	0.002621	0.302621			2504.85	0.002271	0.602271		2504.85	0.001063	0.901063			2504.85	0.000791	1.20079
2503.88	0.002565		2503.88	0.002569	0.302569			2503.88	0.002228	0.602228		2503.88	0.001028	0.901028			2503.88	0.000763	1.20076
2502.92	0.002508		2502.92	0.00252	0.30252			2502.92	0.002208	0.602208		2502.92	0.001013	0.901013			2502.92	0.000754	1.20075
2501.96	0.002471		2501.96	0.002486	0.302486			2501.96	0.002205	0.602205		2501.96	0.001013	0.901013			2501.96	0.000756	1.20076
2500.99	0.002446		2500.99	0.002465	0.302465			2500.99	0.002198	0.602198		2500.99	0.000987	0.900987			2500.99	0.000723	1.20072
2500.03	0.00245		2500.03	0.002471	0.302471			2500.03	0.002184	0.602184		2500.03	0.000962	0.900962			2500.03	0.00068	1.20068
2499.06	0.002455		2499.06	0.002471	0.302471			2499.06	0.002164	0.602164		2499.06	0.000951	0.900951			2499.06	0.000652	1.20065
2498.1	0.002435		2498.1	0.00244	0.30244			2498.1	0.002151	0.602151		2498.1	0.000937	0.900937			2498.1	0.000637	1.20064
2497.14	0.002414		2497.14	0.002402	0.302402			2497.14	0.002153	0.602153		2497.14	0.00092	0.90092			2497.14	0.000636	1.20064
2496.17	0.002401		2496.17	0.002378	0.302378			2496.17	0.002152	0.602152		2496.17	0.00091	0.90091			2496.17	0.00065	1.20065
2495.21	0.002382		2495.21	0.00236	0.30236			2495.21	0.002131	0.602131		2495.21	0.000923	0.900923			2495.21	0.000679	1.20068
2494.24	0.002366		2494.24	0.002342	0.302342			2494.24	0.002102	0.602102		2494.24	0.000939	0.900939			2494.24	0.000688	1.20069
2493.28	0.002364		2493.28	0.002341	0.302341			2493.28	0.002103	0.602103		2493.28	0.000925	0.900925			2493.28	0.000665	1.20066
2492.31	0.002383		2492.31	0.002358	0.302358			2492.31	0.002134	0.602134		2492.31	0.000906	0.900906			2492.31	0.000648	1.20065
2491.35	0.002413		2491.35	0.002368	0.302368			2491.35	0.002159	0.602159		2491.35	0.000933	0.900933			2491.35	0.000667	1.20067
2490.39	0.002435		2490.39	0.002375	0.302375			2490.39	0.002173	0.602173		2490.39	0.000992	0.900992			2490.39	0.000715	1.20071
2489.42	0.002447		2489.42	0.00239	0.30239			2489.42	0.002182	0.602182		2489.42	0.001035	0.901035			2489.42	0.00076	1.20076
2488.46	0.002441		2488.46	0.002387	0.302387			2488.46	0.002172	0.602172		2488.46	0.001042	0.901042			2488.46	0.000779	1.20078
2487.49	0.002413		2487.49	0.002339	0.302339			2487.49	0.002146	0.602146		2487.49	0.001027	0.901027			2487.49	0.000775	1.20077
2486.53	0.002389		2486.53	0.002286	0.302286			2486.53	0.002136	0.602136		2486.53	0.001023	0.901023			2486.53	0.000771	1.20077
2485.57	0.002385		2485.57	0.002273	0.302273			2485.57	0.002143	0.602143		2485.57	0.001042	0.901042			2485.57	0.000791	1.20079
2484.6	0.002372		2484.6	0.002276	0.302276			2484.6	0.002125	0.602125		2484.6	0.001029	0.901029			2484.6	0.000791	1.20079
2483.64	0.00233		2483.64	0.002249	0.302249			2483.64	0.002078	0.602078		2483.64	0.000958	0.900958			2483.64	0.00073	1.20073
2482.67	0.002284		2482.67	0.002212	0.302212			2482.67	0.002042	0.602042		2482.67	0.000892	0.900892			2482.67	0.000664	1.20066
2481.71	0.002248		2481.71	0.002195	0.302195			2481.71	0.002029	0.602029		2481.71	0.000863	0.900863			2481.71	0.000633	1.20063
2480.74	0.002218		2480.74	0.002197	0.302197			2480.74	0.002023	0.602023		2480.74	0.00085	0.90085			2480.74	0.0006	1.2006
2479.78	0.002207		2479.78	0.002204	0.302204			2479.78	0.002035	0.602035		2479.78	0.000856	0.900856			2479.78	0.000567	1.20057
2478.82	0.002214		2478.82	0.002206	0.302206			2478.82	0.002072	0.602072		2478.82	0.000875	0.900875			2478.82	0.00057	1.20057
2477.85	0.002222		2477.85	0.0022	0.3022			2477.85	0.002103	0.602103		2477.85	0.000886	0.900886			2477.85	0.000596	1.2006
2476.89	0.002242		2476.89	0.00219	0.30219			2476.89	0.002098	0.602098		2476.89	0.000891	0.900891			2476.89	0.000624	1.20062
2475.92	0.002273		2475.92	0.002185	0.302185			2475.92	0.002092	0.602092		2475.92	0.000911	0.900911			2475.92	0.000663	1.20066
2474.96	0.002281		2474.96	0.002192	0.302192			2474.96	0.002125	0.602125		2474.96	0.000942	0.900942			2474.96	0.000688	1.20069
2474	0.002265		2474	0.002205	0.302205			2474	0.002152	0.602152		2474	0.000961	0.900961			2474	0.000681	1.20068
2473.03	0.002258		2473.03	0.002216	0.302216			2473.03	0.002137	0.602137		2473.03	0.000969	0.900969			2473.03	0.000679	1.20068
2472.07	0.002273		2472.07	0.00223	0.30223			2472.07	0.002125	0.602125		2472.07	0.000987	0.900987			2472.07	0.000715	1.20071
2471.1	0.002294		2471.1	0.002237	0.302237			2471.1	0.002153	0.602153		2471.1	0.001007	0.901007			2471.1	0.000772	1.20077
2470.14	0.002286		2470.14	0.002226	0.302226			2470.14	0.002177	0.602177		2470.14	0.00101	0.90101			2470.14	0.000801	1.2008
2469.18	0.002233		2469.18	0.002202	0.302202			2469.18	0.002136	0.602136		2469.18	0.000967	0.900967			2469.18	0.000752	1.20075
2468.21	0.002158		2468.21	0.002159	0.302159			2468.21	0.002052	0.602052		2468.21	0.000853	0.900853			2468.21	0.000643	1.20064
2467.25	0.002095		2467.25	0.002092	0.302092			2467.25	0.001981	0.601981		2467.25	0.00075	0.90075			2467.25	0.000553	1.20055
2466.28	0.002054		2466.28	0.002029	0.302029			2466.28	0.00194	0.60194		2466.28	0.000744	0.900744			2466.28	0.00052	1.20052
2465.32	0.002041		2465.32	0.002005	0.302005			2465.32	0.001929	0.601929		2465.32	0.000795	0.900795			2465.32	0.000537	1.20054
2464.35	0.002042		2464.35	0.002009	0.302009			2464.35	0.001939	0.601939		2464.35	0.000811	0.900811			2464.35	0.000553	1.20055
2463.39	0.002027		2463.39	0.001992	0.301992			2463.39	0.001932	0.601932		2463.39	0.000771	0.900771			2463.39	0.000514	1.20051
2462.43	0.00199		2462.43	0.001937	0.301937			2462.43	0.001895	0.601895		2462.43	0.00071	0.90071			2462.43	0.000451	1.20045
2461.46	0.00196		2461.46	0.001879	0.301879			2461.46	0.001859	0.601859		2461.46	0.000673	0.900673			2461.46	0.000428	1.20043
2460.5	0.001956		2460.5	0.001848	0.301848			2460.5	0.001845	0.601845		2460.5	0.000675	0.900675			2460.5	0.000435	1.20043
2459.53	0.001977		2459.53	0.001854	0.301854			2459.53	0.001852	0.601852		2459.53	0.000707	0.900707			2459.53	0.000445	1.20044
2458.57	0.00201		2458.57	0.001896	0.301896			2458.57	0.001871	0.601871		2458.57	0.000754	0.900754			2458.57	0.000468	1.20047
2457.61	0.002011		2457.61	0.001923	0.301923			2457.61	0.001872	0.601872		2457.61	0.000774	0.900774			2457.61	0.000497	1.2005
2456.64	0.001959		2456.64	0.001892	0.301892			2456.64	0.001837	0.601837		2456.64	0.000745	0.900745			2456.64	0.000505	1.2005
2455.68	0.0019		2455.68	0.001846	0.301846			2455.68	0.001802	0.601802		2455.68	0.000713	0.900713			2455.68	0.00051	1.20051
2454.71	0.001884		2454.71	0.001833	0.301833			2454.71	0.001789	0.601789		2454.71	0.000737	0.900737			2454.71	0.000546	1.20055
2453.75	0.001908		2453.75	0.001831	0.301831			2453.75	0.001786	0.601786		2453.75	0.000798	0.900798			2453.75	0.000588	1.20059
2452.78	0.001938		2452.78	0.001816	0.301816			2452.78	0.001774	0.601774		2452.78	0.00081	0.90081			2452.78	0.000572	1.20057
2451.82	0.001938		2451.82	0.001789	0.301789			2451.82	0.001758	0.601758		2451.82	0.000761	0.900761			2451.82	0.000503	1.2005
2450.86	0.001912		2450.86	0.001768	0.301768			2450.86	0.001771	0.601771		2450.86	0.000733	0.900733			2450.86	0.000452	1.20045
2449.89	0.001886		2449.89	0.001756	0.301756			2449.89	0.001797	0.601797		2449.89	0.000743	0.900743			2449.89	0.000432	1.20043
2448.93	0.001866		2448.93	0.00174	0.30174			2448.93	0.001794	0.601794		2448.93	0.000724	0.900724			2448.93	0.000403	1.2004
2447.96	0.001851		2447.96	0.001726	0.301726			2447.96	0.001768	0.601768		2447.96	0.000672	0.900672			2447.96	0.000377	1.20038
2447	0.001848		2447	0.00172	0.30172			2447	0.00174	0.60174		2447	0.000647	0.900647			2447	0.000386	1.20039
2446.04	0.001858		2446.04	0.001717	0.301717			2446.04	0.001717	0.601717		2446.04	0.000654	0.900654			2446.04	0.000411	1.20041
2445.07	0.001862		2445.07	0.001725	0.301725			2445.07	0.00172	0.60172		2445.07	0.000659	0.900659			2445.07	0.000412	1.20041
2444.11	0.001856		2444.11	0.001749	0.301749			2444.11	0.001746	0.601746		2444.11	0.000677	0.900677			2444.11	0.00041	1.20041
2443.14	0.001837		2443.14	0.001765	0.301765			2443.14	0.001768	0.601768		2443.14	0.000722	0.900722			2443.14	0.000439	1.20044
2442.18	0.001808		2442.18	0.001746	0.301746			2442.18	0.001776	0.601776		2442.18	0.000745	0.900745			2442.18	0.000467	1.20047
2441.21	0.001804		2441.21	0.00172	0.30172			2441.21	0.001777	0.601777		2441.21	0.000721	0.900721			2441.21	0.000453	1.20045
2440.25	0.001829		2440.25	0.001717	0.301717			2440.25	0.001764	0.601764		2440.25	0.000692	0.900692			2440.25	0.000433	1.20043
2439.29	0.001846		2439.29	0.00173	0.30173			2439.29	0.001734	0.601734		2439.29	0.000696	0.900696			2439.29	0.000451	1.20045
2438.32	0.001842		2438.32	0.001741	0.301741			2438.32	0.001704	0.601704		2438.32	0.000728	0.900728			2438.32	0.000482	1.20048
2437.36	0.001827		2437.36	0.001738	0.301738			2437.36	0.001693	0.601693		2437.36	0.000753	0.900753			2437.36	0.000491	1.20049
2436.39	0.001818		2436.39	0.001713	0.301713			2436.39	0.001708	0.601708		2436.39	0.000757	0.900757			2436.39	0.000494	1.20049
2435.43	0.001815		2435.43	0.001686	0.301686			2435.43	0.001727	0.601727		2435.43	0.000765	0.900765			2435.43	0.000518	1.20052
2434.47	0.0018		2434.47	0.001663	0.301663			2434.47	0.001735	0.601735		2434.47	0.000776	0.900776			2434.47	0.000546	1.20055
2433.5	0.001769		2433.5	0.001652	0.301652			2433.5	0.001744	0.601744		2433.5	0.000769	0.900769			2433.5	0.00054	1.20054
2432.54	0.00174		2432.54	0.001662	0.301662			2432.54	0.001741	0.601741		2432.54	0.000757	0.900757			2432.54	0.000512	1.20051
2431.57	0.001735		2431.57	0.001681	0.301681			2431.57	0.001719	0.601719		2431.57	0.000749	0.900749			2431.57	0.000489	1.20049
2430.61	0.001756		2430.61	0.001703	0.301703			2430.61	0.001715	0.601715		2430.61	0.000739	0.900739			2430.61	0.000467	1.20047
2429.65	0.001776		2429.65	0.00172	0.30172			2429.65	0.001737	0.601737		2429.65	0.00074	0.90074			2429.65	0.000451	1.20045
2428.68	0.001765		2428.68	0.001704	0.301704			2428.68	0.001747	0.601747		2428.68	0.000733	0.900733			2428.68	0.000452	1.20045
2427.72	0.001743		2427.72	0.001666	0.301666			2427.72	0.001739	0.601739		2427.72	0.000702	0.900702			2427.72	0.000451	1.20045
2426.75	0.001745		2426.75	0.001656	0.301656			2426.75	0.001743	0.601743		2426.75	0.000683	0.900683			2426.75	0.000438	1.20044
2425.79	0.001763		2425.79	0.001691	0.301691			2425.79	0.00176	0.60176		2425.79	0.000709	0.900709			2425.79	0.000449	1.20045
2424.82	0.001786		2424.82	0.001744	0.301744			2424.82	0.001779	0.601779		2424.82	0.000763	0.900763			2424.82	0.000511	1.20051
2423.86	0.001814		2423.86	0.001775	0.301775			2423.86	0.001795	0.601795		2423.86	0.00082	0.90082			2423.86	0.000602	1.2006
2422.9	0.001817		2422.9	0.001767	0.301767			2422.9	0.001792	0.601792		2422.9	0.000856	0.900856			2422.9	0.000667	1.20067
2421.93	0.001812		2421.93	0.001756	0.301756			2421.93	0.001795	0.601795		2421.93	0.000863	0.900863			2421.93	0.000665	1.20066
2420.97	0.001831		2420.97	0.001763	0.301763			2420.97	0.001824	0.601824		2420.97	0.000853	0.900853			2420.97	0.000624	1.20062
2420	0.001853		2420	0.001765	0.301765			2420	0.001848	0.601848		2420	0.000848	0.900848			2420	0.000606	1.20061
2419.04	0.001855		2419.04	0.001763	0.301763			2419.04	0.001854	0.601854		2419.04	0.000856	0.900856			2419.04	0.000629	1.20063
2418.08	0.001858		2418.08	0.00179	0.30179			2418.08	0.001871	0.601871		2418.08	0.00087	0.90087			2418.08	0.00066	1.20066
2417.11	0.001874		2417.11	0.001833	0.301833			2417.11	0.0019	0.6019		2417.11	0.00089	0.90089			2417.11	0.000673	1.20067
2416.15	0.001892		2416.15	0.001847	0.301847			2416.15	0.001904	0.601904		2416.15	0.000925	0.900925			2416.15	0.000676	1.20068
2415.18	0.001894		2415.18	0.001827	0.301827			2415.18	0.001882	0.601882		2415.18	0.000954	0.900954			2415.18	0.000668	1.20067
2414.22	0.00186		2414.22	0.001798	0.301798			2414.22	0.001863	0.601863		2414.22	0.000946	0.900946			2414.22	0.00065	1.20065
2413.25	0.001815		2413.25	0.001766	0.301766			2413.25	0.00186	0.60186		2413.25	0.000908	0.900908			2413.25	0.000638	1.20064
2412.29	0.001803		2412.29	0.001736	0.301736			2412.29	0.001858	0.601858		2412.29	0.000876	0.900876			2412.29	0.000643	1.20064
2411.33	0.00181		2411.33	0.001714	0.301714			2411.33	0.001837	0.601837		2411.33	0.000864	0.900864			2411.33	0.000662	1.20066
2410.36	0.001822		2410.36	0.001704	0.301704			2410.36	0.00182	0.60182		2410.36	0.00086	0.90086			2410.36	0.000662	1.20066
2409.4	0.001839		2409.4	0.001699	0.301699			2409.4	0.001834	0.601834		2409.4	0.000856	0.900856			2409.4	0.000633	1.20063
2408.43	0.001828		2408.43	0.001688	0.301688			2408.43	0.001838	0.601838		2408.43	0.000852	0.900852			2408.43	0.000605	1.2006
2407.47	0.001795		2407.47	0.001687	0.301687			2407.47	0.001807	0.601807		2407.47	0.000842	0.900842			2407.47	0.000605	1.2006
2406.51	0.00177		2406.51	0.001687	0.301687			2406.51	0.001781	0.601781		2406.51	0.000849	0.900849			2406.51	0.000636	1.20064
2405.54	0.001741		2405.54	0.00166	0.30166			2405.54	0.001785	0.601785		2405.54	0.000871	0.900871			2405.54	0.000659	1.20066
2404.58	0.001717		2404.58	0.001614	0.301614			2404.58	0.001797	0.601797		2404.58	0.000859	0.900859			2404.58	0.000643	1.20064
2403.61	0.00171		2403.61	0.001572	0.301572			2403.61	0.001788	0.601788		2403.61	0.00082	0.90082			2403.61	0.000613	1.20061
2402.65	0.00169		2402.65	0.001545	0.301545			2402.65	0.001754	0.601754		2402.65	0.000795	0.900795			2402.65	0.000578	1.20058
2401.68	0.001663		2401.68	0.001541	0.301541			2401.68	0.001719	0.601719		2401.68	0.000779	0.900779			2401.68	0.000529	1.20053
2400.72	0.001671		2400.72	0.001566	0.301566			2400.72	0.001709	0.601709		2400.72	0.000759	0.900759			2400.72	0.000497	1.2005
2399.76	0.001706		2399.76	0.001601	0.301601			2399.76	0.001737	0.601737		2399.76	0.000752	0.900752			2399.76	0.000504	1.2005
2398.79	0.001734		2398.79	0.001601	0.301601			2398.79	0.001778	0.601778		2398.79	0.000774	0.900774			2398.79	0.000533	1.20053
2397.83	0.001738		2397.83	0.001581	0.301581			2397.83	0.001788	0.601788		2397.83	0.000796	0.900796			2397.83	0.000544	1.20054
2396.86	0.001713		2396.86	0.00158	0.30158			2396.86	0.001761	0.601761		2396.86	0.000785	0.900785			2396.86	0.000524	1.20052
2395.9	0.001708		2395.9	0.001575	0.301575			2395.9	0.001719	0.601719		2395.9	0.00075	0.90075			2395.9	0.000501	1.2005
2394.94	0.001703		2394.94	0.00157	0.30157			2394.94	0.001693	0.601693		2394.94	0.00072	0.90072			2394.94	0.000487	1.20049
2393.97	0.001699		2393.97	0.001565	0.301565			2393.97	0.001697	0.601697		2393.97	0.000711	0.900711			2393.97	0.000484	1.20048
2393.01	0.001694		2393.01	0.001561	0.301561			2393.01	0.001707	0.601707		2393.01	0.000729	0.900729			2393.01	0.0005	1.2005
2392.04	0.001689		2392.04	0.001556	0.301556			2392.04	0.001707	0.601707		2392.04	0.000755	0.900755			2392.04	0.000525	1.20053
2391.08	0.001684		2391.08	0.001551	0.301551			2391.08	0.001691	0.601691		2391.08	0.000761	0.900761			2391.08	0.000534	1.20053
2390.12	0.001679		2390.12	0.001546	0.301546			2390.12	0.001681	0.601681		2390.12	0.000761	0.900761			2390.12	0.000533	1.20053
2389.15	0.001674		2389.15	0.001541	0.301541			2389.15	0.001708	0.601708		2389.15	0.000792	0.900792			2389.15	0.000533	1.20053
2388.19	0.001669		2388.19	0.001536	0.301536			2388.19	0.00177	0.60177		2388.19	0.000848	0.900848			2388.19	0.000524	1.20052
2387.22	0.001664		2387.22	0.001531	0.301531			2387.22	0.001847	0.601847		2387.22	0.000905	0.900905			2387.22	0.000526	1.20053
2386.26	0.00166		2386.26	0.001526	0.301526			2386.26	0.00191	0.60191		2386.26	0.000963	0.900963			2386.26	0.000555	1.20056
2385.29	0.001655		2385.29	0.001522	0.301522			2385.29	0.001958	0.601958		2385.29	0.001025	0.901025			2385.29	0.000574	1.20057
2384.33	0.00165		2384.33	0.001517	0.301517			2384.33	0.002027	0.602027		2384.33	0.001096	0.901096			2384.33	0.000558	1.20056
2383.37	0.001645		2383.37	0.001512	0.301512			2383.37	0.002128	0.602128		2383.37	0.001199	0.901199			2383.37	0.000552	1.20055
2382.4	0.00164		2382.4	0.001507	0.301507			2382.4	0.002248	0.602248		2382.4	0.001348	0.901348			2382.4	0.000589	1.20059
2381.44	0.001635		2381.44	0.001502	0.301502			2381.44	0.002381	0.602381		2381.44	0.001505	0.901505			2381.44	0.000618	1.20062
2380.47	0.00163		2380.47	0.001497	0.301497			2380.47	0.002524	0.602524		2380.47	0.001634	0.901634			2380.47	0.000597	1.2006
2379.51	0.001626		2379.51	0.001492	0.301492			2379.51	0.002679	0.602679		2379.51	0.001758	0.901758			2379.51	0.000564	1.20056
2378.55	0.001621		2378.55	0.001487	0.301487			2378.55	0.002837	0.602837		2378.55	0.001874	0.901874			2378.55	0.000534	1.20053
2377.58	0.001616		2377.58	0.001482	0.301482			2377.58	0.002993	0.602993		2377.58	0.001951	0.901951			2377.58	0.000479	1.20048
2376.62	0.001611		2376.62	0.001478	0.301478			2376.62	0.003202	0.603202		2376.62	0.001991	0.901991			2376.62	0.000398	1.2004
2375.65	0.001606		2375.65	0.001473	0.301473			2375.65	0.003463	0.603463		2375.65	0.002002	0.902002			2375.65	0.00029	1.20029
2374.69	0.001601		2374.69	0.001468	0.301468			2374.69	0.003692	0.603692		2374.69	0.00198	0.90198			2374.69	0.000119	1.20012
2373.72	0.001596		2373.72	0.001463	0.301463			2373.72	0.00388	0.60388		2373.72	0.002009	0.902009			2373.72	-9.7e-05	1.1999
2372.76	0.001591		2372.76	0.001458	0.301458			2372.76	0.004043	0.604043		2372.76	0.002123	0.902123			2372.76	-0.000281	1.19972
2371.8	0.001587		2371.8	0.001453	0.301453			2371.8	0.004197	0.604197		2371.8	0.002175	0.902175			2371.8	-0.000439	1.19956
2370.83	0.001582		2370.83	0.001448	0.301448			2370.83	0.004353	0.604353		2370.83	0.002061	0.902061			2370.83	-0.000639	1.19936
2369.87	0.001577		2369.87	0.001443	0.301443			2369.87	0.00452	0.60452		2369.87	0.001884	0.901884			2369.87	-0.000919	1.19908
2368.9	0.001572		2368.9	0.001439	0.301439			2368.9	0.004783	0.604783		2368.9	0.001688	0.901688			2368.9	-0.001271	1.19873
2367.94	0.001567		2367.94	0.001434	0.301434			2367.94	0.005096	0.605096		2367.94	0.001544	0.901544			2367.94	-0.00155	1.19845
2366.98	0.001562		2366.98	0.001429	0.301429			2366.98	0.005223	0.605223		2366.98	0.001528	0.901528			2366.98	-0.001606	1.19839
2366.01	0.001557		2366.01	0.001424	0.301424			2366.01	0.005152	0.605152		2366.01	0.001508	0.901508			2366.01	-0.001582	1.19842
2365.05	0.001552		2365.05	0.001419	0.301419			2365.05	0.005137	0.605137		2365.05	0.001376	0.901376			2365.05	-0.001745	1.19825
2364.08	0.001548		2364.08	0.001414	0.301414			2364.08	0.005273	0.605273		2364.08	0.001007	0.901007			2364.08	-0.00223	1.19777
2363.12	0.001543		2363.12	0.001409	0.301409			2363.12	0.005328	0.605328		2363.12	0.000409	0.900409			2363.12	-0.002801	1.1972
2362.16	0.001538		2362.16	0.001404	0.301404			2362.16	0.005203	0.605203		2362.16	-1.2e-05	0.899988			2362.16	-0.003037	1.19696
2361.19	0.001533		2361.19	0.0014	0.3014			2361.19	0.005209	0.605209		2361.19	-4.2e-05	0.899958			2361.19	-0.002945	1.19705
2360.23	0.001528		2360.23	0.001395	0.301395			2360.23	0.00551	0.60551		2360.23	6.3e-05	0.900063			2360.23	-0.002731	1.19727
2359.26	0.001523		2359.26	0.00139	0.30139			2359.26	0.005712	0.605712		2359.26	8.9e-05	0.900089			2359.26	-0.002509	1.19749
2358.3	0.001518		2358.3	0.001385	0.301385			2358.3	0.005601	0.605601		2358.3	0.000195	0.900195			2358.3	-0.002323	1.19768
2357.33	0.001513		2357.33	0.00138	0.30138			2357.33	0.005416	0.605416		2357.33	0.000445	0.900445			2357.33	-0.002092	1.19791
2356.37	0.001509		2356.37	0.001375	0.301375			2356.37	0.005321	0.605321		2356.37	0.000635	0.900635			2356.37	-0.001753	1.19825
2355.41	0.001504		2355.41	0.00137	0.30137			2355.41	0.005239	0.605239		2355.41	0.000826	0.900826			2355.41	-0.00137	1.19863
2354.44	0.001499		2354.44	0.001365	0.301365			2354.44	0.005174	0.605174		2354.44	0.001171	0.901171			2354.44	-0.0011	1.1989
2353.48	0.001494		2353.48	0.001361	0.301361			2353.48	0.005152	0.605152		2353.48	0.001542	0.901542			2353.48	-0.000919	1.19908
2352.51	0.001489		2352.51	0.001356	0.301356			2352.51	0.005011	0.605011		2352.51	0.001844	0.901844			2352.51	-0.00062	1.19938
2351.55	0.001484		2351.55	0.001351	0.301351			2351.55	0.004762	0.604762		2351.55	0.002142	0.902142			2351.55	-0.000189	1.19981
2350.59	0.001479		2350.59	0.001346	0.301346			2350.59	0.00458	0.60458		2350.59	0.002432	0.902432			2350.59	0.000173	1.20017
2349.62	0.001474		2349.62	0.001341	0.301341			2349.62	0.004492	0.604492		2349.62	0.00265	0.90265			2349.62	0.000431	1.20043
2348.66	0.00147		2348.66	0.001336	0.301336			2348.66	0.004579	0.604579		2348.66	0.002841	0.902841			2348.66	0.000644	1.20064
2347.69	0.001465		2347.69	0.001331	0.301331			2347.69	0.004852	0.604852		2347.69	0.002968	0.902968			2347.69	0.000692	1.20069
2346.73	0.00146		2346.73	0.001326	0.301326			2346.73	0.005107	0.605107		2346.73	0.002882	0.902882			2346.73	0.000461	1.20046
2345.76	0.001455		2345.76	0.001321	0.301321			2345.76	0.005187	0.605187		2345.76	0.002661	0.902661			2345.76	0.000142	1.20014
2344.8	0.00145		2344.8	0.001317	0.301317			2344.8	0.005135	0.605135		2344.8	0.002504	0.902504			2344.8	-5.5e-05	1.19995
2343.84	0.001445		2343.84	0.001312	0.301312			2343.84	0.005028	0.605028		2343.84	0.002355	0.902355			2343.84	-0.000194	1.19981
2342.87	0.00144		2342.87	0.001307	0.301307			2342.87	0.005003	0.605003		2342.87	0.002158	0.902158			2342.87	-0.000321	1.19968
2341.91	0.001435		2341.91	0.001302	0.301302			2341.91	0.005095	0.605095		2341.91	0.002	0.902			2341.91	-0.000466	1.19953
2340.94	0.001431		2340.94	0.001297	0.301297			2340.94	0.005195	0.605195		2340.94	0.001948	0.901948			2340.94	-0.000639	1.19936
2339.98	0.001426		2339.98	0.001292	0.301292			2339.98	0.005282	0.605282		2339.98	0.00199	0.90199			2339.98	-0.000653	1.19935
2339.02	0.001421		2339.02	0.001287	0.301287			2339.02	0.00538	0.60538		2339.02	0.002071	0.902071			2339.02	-0.000468	1.19953
2338.05	0.001416		2338.05	0.001282	0.301282			2338.05	0.005428	0.605428		2338.05	0.002054	0.902054			2338.05	-0.0004	1.1996
2337.09	0.001411		2337.09	0.001278	0.301278			2337.09	0.00539	0.60539		2337.09	0.001898	0.901898			2337.09	-0.000519	1.19948
2336.12	0.001406		2336.12	0.001273	0.301273			2336.12	0.005291	0.605291		2336.12	0.001817	0.901817			2336.12	-0.000526	1.19947
2335.16	0.001401		2335.16	0.001268	0.301268			2335.16	0.005268	0.605268		2335.16	0.002002	0.902002			2335.16	-0.00034	1.19966
2334.19	0.001396		2334.19	0.001263	0.301263			2334.19	0.005344	0.605344		2334.19	0.002277	0.902277			2334.19	-0.000187	1.19981
2333.23	0.001392		2333.23	0.001258	0.301258			2333.23	0.005317	0.605317		2333.23	0.002452	0.902452			2333.23	-0.000123	1.19988
2332.27	0.001387		2332.27	0.001253	0.301253			2332.27	0.005172	0.605172		2332.27	0.002568	0.902568			2332.27	-4.1e-05	1.19996
2331.3	0.001382		2331.3	0.001248	0.301248			2331.3	0.005007	0.605007		2331.3	0.002625	0.902625			2331.3	4.5e-05	1.20005
2330.34	0.001377		2330.34	0.001243	0.301243			2330.34	0.00488	0.60488		2330.34	0.002617	0.902617			2330.34	8.1e-05	1.20008
2329.37	0.001372		2329.37	0.001239	0.301239			2329.37	0.004857	0.604857		2329.37	0.002618	0.902618			2329.37	0.000114	1.20011
2328.41	0.001367		2328.41	0.001234	0.301234			2328.41	0.004917	0.604917		2328.41	0.002659	0.902659			2328.41	0.000158	1.20016
2327.45	0.001362		2327.45	0.001229	0.301229			2327.45	0.004936	0.604936		2327.45	0.002693	0.902693			2327.45	0.000119	1.20012
2326.48	0.001357		2326.48	0.001224	0.301224			2326.48	0.004877	0.604877		2326.48	0.002694	0.902694			2326.48	3.7e-05	1.20004
2325.52	0.001353		2325.52	0.001219	0.301219			2325.52	0.004863	0.604863		2325.52	0.002699	0.902699			2325.52	4.4e-05	1.20004
2324.55	0.001348		2324.55	0.001214	0.301214			2324.55	0.004893	0.604893		2324.55	0.002709	0.902709			2324.55	0.000146	1.20015
2323.59	0.001343		2323.59	0.001209	0.301209			2323.59	0.004822	0.604822		2323.59	0.002692	0.902692			2323.59	0.000291	1.20029
2322.63	0.001338		2322.63	0.001204	0.301204			2322.63	0.004648	0.604648		2322.63	0.002675	0.902675			2322.63	0.000444	1.20044
2321.66	0.001333		2321.66	0.0012	0.3012			2321.66	0.004494	0.604494		2321.66	0.002668	0.902668			2321.66	0.000579	1.20058
2320.7	0.001328		2320.7	0.001195	0.301195			2320.7	0.004373	0.604373		2320.7	0.002642	0.902642			2320.7	0.00065	1.20065
2319.73	0.001323		2319.73	0.00119	0.30119			2319.73	0.004258	0.604258		2319.73	0.002619	0.902619			2319.73	0.000643	1.20064
2318.77	0.001318		2318.77	0.001185	0.301185			2318.77	0.004179	0.604179		2318.77	0.002628	0.902628			2318.77	0.00064	1.20064
2317.8	0.001314		2317.8	0.00118	0.30118			2317.8	0.004098	0.604098		2317.8	0.00263	0.90263			2317.8	0.000686	1.20069
2316.84	0.001309		2316.84	0.001175	0.301175			2316.84	0.003959	0.603959		2316.84	0.002604	0.902604			2316.84	0.000734	1.20073
2315.88	0.001304		2315.88	0.00117	0.30117			2315.88	0.003777	0.603777		2315.88	0.002558	0.902558			2315.88	0.000739	1.20074
2314.91	0.001299		2314.91	0.001165	0.301165			2314.91	0.003645	0.603645		2314.91	0.002511	0.902511			2314.91	0.000719	1.20072
2313.95	0.001294		2313.95	0.00116	0.30116			2313.95	0.003596	0.603596		2313.95	0.002466	0.902466			2313.95	0.00072	1.20072
2312.98	0.001289		2312.98	0.001156	0.301156			2312.98	0.00354	0.60354		2312.98	0.002486	0.902486			2312.98	0.000772	1.20077
2312.02	0.001284		2312.02	0.001151	0.301151			2312.02	0.003434	0.603434		2312.02	0.002597	0.902597			2312.02	0.000827	1.20083
2311.06	0.00128		2311.06	0.001146	0.301146			2311.06	0.003306	0.603306		2311.06	0.002634	0.902634			2311.06	0.000841	1.20084
2310.09	0.001275		2310.09	0.001141	0.301141			2310.09	0.003207	0.603207		2310.09	0.002511	0.902511			2310.09	0.000844	1.20084
2309.13	0.00127		2309.13	0.001136	0.301136			2309.13	0.003167	0.603167		2309.13	0.002346	0.902346			2309.13	0.000831	1.20083
2308.16	0.001265		2308.16	0.001131	0.301131			2308.16	0.003158	0.603158		2308.16	0.002257	0.902257			2308.16	0.00082	1.20082
2307.2	0.00126		2307.2	0.001126	0.301126			2307.2	0.003104	0.603104		2307.2	0.002227	0.902227			2307.2	0.000839	1.20084
2306.23	0.001255		2306.23	0.001121	0.301121			2306.23	0.002971	0.602971		2306.23	0.002166	0.902166			2306.23	0.00085	1.20085
2305.27	0.00125		2305.27	0.001117	0.301117			2305.27	0.002839	0.602839		2305.27	0.002067	0.902067			2305.27	0.000842	1.20084
2304.31	0.001245		2304.31	0.001112	0.301112			2304.31	0.002799	0.602799		2304.31	0.001973	0.901973			2304.31	0.000846	1.20085
2303.34	0.001241		2303.34	0.001107	0.301107			2303.34	0.002836	0.602836		2303.34	0.001916	0.901916			2303.34	0.000855	1.20086
2302.38	0.001236		2302.38	0.001102	0.301102			2302.38	0.002844	0.602844		2302.38	0.001901	0.901901			2302.38	0.00084	1.20084
2301.41	0.001231		2301.41	0.001097	0.301097			2301.41	0.002785	0.602785		2301.41	0.00191	0.90191			2301.41	0.000824	1.20082
2300.45	0.001226		2300.45	0.001092	0.301092			2300.45	0.002697	0.602697		2300.45	0.001897	0.901897			2300.45	0.000831	1.20083
2299.49	0.001221		2299.49	0.001087	0.301087			2299.49	0.002619	0.602619		2299.49	0.001832	0.901832			2299.49	0.000831	1.20083
2298.52	0.001216		2298.52	0.001082	0.301082			2298.52	0.00258	0.60258		2298.52	0.00176	0.90176			2298.52	0.000806	1.20081
2297.56	0.001211		2297.56	0.001078	0.301078			2297.56	0.002535	0.602535		2297.56	0.001705	0.901705			2297.56	0.000769	1.20077
2296.59	0.001206		2296.59	0.001073	0.301073			2296.59	0.002448	0.602448		2296.59	0.001664	0.901664			2296.59	0.000738	1.20074
2295.63	0.001202		2295.63	0.001068	0.301068			2295.63	0.00238	0.60238		2295.63	0.001628	0.901628			2295.63	0.000718	1.20072
2294.66	0.001197		2294.66	0.001063	0.301063			2294.66	0.002358	0.602358		2294.66	0.001587	0.901587			2294.66	0.000704	1.2007
2293.7	0.001192		2293.7	0.001058	0.301058			2293.7	0.002341	0.602341		2293.7	0.001544	0.901544			2293.7	0.00069	1.20069
2292.74	0.001187		2292.74	0.001053	0.301053			2292.74	0.002292	0.602292		2292.74	0.001486	0.901486			2292.74	0.000687	1.20069
2291.77	0.001182		2291.77	0.001048	0.301048			2291.77	0.002233	0.602233		2291.77	0.00144	0.90144			2291.77	0.000698	1.2007
2290.81	0.001177		2290.81	0.001043	0.301043			2290.81	0.002205	0.602205		2290.81	0.001394	0.901394			2290.81	0.000689	1.20069
2289.84	0.001172		2289.84	0.001038	0.301038			2289.84	0.002209	0.602209		2289.84	0.001334	0.901334			2289.84	0.000685	1.20069
2288.88	0.001167		2288.88	0.001034	0.301034			2288.88	0.0022	0.6022		2288.88	0.001299	0.901299			2288.88	0.000727	1.20073
2287.92	0.001163		2287.92	0.001029	0.301029			2287.92	0.002162	0.602162		2287.92	0.001265	0.901265			2287.92	0.000759	1.20076
2286.95	0.001158		2286.95	0.001024	0.301024			2286.95	0.00211	0.60211		2286.95	0.001185	0.901185			2286.95	0.000724	1.20072
2285.99	0.001153		2285.99	0.001019	0.301019			2285.99	0.002041	0.602041		2285.99	0.001072	0.901072			2285.99	0.000656	1.20066
2285.02	0.001148		2285.02	0.001014	0.301014			2285.02	0.001976	0.601976		2285.02	0.000997	0.900997			2285.02	0.000616	1.20062
2284.06	0.001143		2284.06	0.001009	0.301009			2284.06	0.001943	0.601943		2284.06	0.00099	0.90099			2284.06	0.000612	1.20061
2283.1	0.001138		2283.1	0.001004	0.301004			2283.1	0.001937	0.601937		2283.1	0.00101	0.90101			2283.1	0.000617	1.20062
2282.13	0.001133		2282.13	0.000999	0.300999			2282.13	0.001952	0.601952		2282.13	0.001025	0.901025			2282.13	0.000614	1.20061
2281.17	0.001128		2281.17	0.000995	0.300995			2281.17	0.001979	0.601979		2281.17	0.001024	0.901024			2281.17	0.000608	1.20061
2280.2	0.001124		2280.2	0.00099	0.30099			2280.2	0.001989	0.601989		2280.2	0.001033	0.901033			2280.2	0.000622	1.20062
2279.24	0.001119		2279.24	0.000985	0.300985			2279.24	0.001964	0.601964		2279.24	0.001053	0.901053			2279.24	0.000651	1.20065
2278.27	0.001114		2278.27	0.00098	0.30098			2278.27	0.001955	0.601955		2278.27	0.001061	0.901061			2278.27	0.000659	1.20066
2277.31	0.001109		2277.31	0.000975	0.300975			2277.31	0.001973	0.601973		2277.31	0.001068	0.901068			2277.31	0.00064	1.20064
2276.35	0.001104		2276.35	0.00097	0.30097			2276.35	0.001978	0.601978		2276.35	0.00108	0.90108			2276.35	0.000612	1.20061
2275.38	0.001099		2275.38	0.000965	0.300965			2275.38	0.00197	0.60197		2275.38	0.001086	0.901086			2275.38	0.000602	1.2006
2274.42	0.001094		2274.42	0.00096	0.30096			2274.42	0.001957	0.601957		2274.42	0.001082	0.901082			2274.42	0.000614	1.20061
2273.45	0.001089		2273.45	0.000956	0.300956			2273.45	0.001945	0.601945		2273.45	0.001079	0.901079			2273.45	0.000623	1.20062
2272.49	0.001085		2272.49	0.000951	0.300951			2272.49	0.001955	0.601955		2272.49	0.001094	0.901094			2272.49	0.000611	1.20061
2271.53	0.00108		2271.53	0.000946	0.300946			2271.53	0.001976	0.601976		2271.53	0.001105	0.901105			2271.53	0.000589	1.20059
2270.56	0.001075		2270.56	0.000941	0.300941			2270.56	0.001981	0.601981		2270.56	0.001074	0.901074			2270.56	0.000563	1.20056
2269.6	0.00107		2269.6	0.000936	0.300936			2269.6	0.001965	0.601965		2269.6	0.001011	0.901011			2269.6	0.000531	1.20053
2268.63	0.001065		2268.63	0.000931	0.300931			2268.63	0.001939	0.601939		2268.63	0.000963	0.900963			2268.63	0.000506	1.20051
2267.67	0.00106		2267.67	0.000926	0.300926			2267.67	0.001913	0.601913		2267.67	0.000921	0.900921			2267.67	0.000503	1.2005
2266.7	0.001055		2266.7	0.000921	0.300921			2266.7	0.001889	0.601889		2266.7	0.000875	0.900875			2266.7	0.000496	1.2005
2265.74	0.00105		2265.74	0.000917	0.300917			2265.74	0.001827	0.601827		2265.74	0.000866	0.900866			2265.74	0.000477	1.20048
2264.78	0.001046		2264.78	0.000912	0.300912			2264.78	0.001752	0.601752		2264.78	0.000897	0.900897			2264.78	0.000465	1.20046
2263.81	0.001041		2263.81	0.000907	0.300907			2263.81	0.00174	0.60174		2263.81	0.000921	0.900921			2263.81	0.000449	1.20045
2262.85	0.001036		2262.85	0.000902	0.300902			2262.85	0.001762	0.601762		2262.85	0.000933	0.900933			2262.85	0.00043	1.20043
2261.88	0.001031		2261.88	0.000897	0.300897			2261.88	0.001756	0.601756		2261.88	0.000935	0.900935			2261.88	0.000438	1.20044
2260.92	0.001026		2260.92	0.000892	0.300892			2260.92	0.001742	0.601742		2260.92	0.000899	0.900899			2260.92	0.000441	1.20044
2259.96	0.001021		2259.96	0.000887	0.300887			2259.96	0.001744	0.601744		2259.96	0.000842	0.900842			2259.96	0.000419	1.20042
2258.99	0.001016		2258.99	0.000882	0.300882			2258.99	0.001744	0.601744		2258.99	0.00082	0.90082			2258.99	0.000411	1.20041
2258.03	0.001011		2258.03	0.000877	0.300877			2258.03	0.00174	0.60174		2258.03	0.000827	0.900827			2258.03	0.000425	1.20042
2257.06	0.001007		2257.06	0.000873	0.300873			2257.06	0.00173	0.60173		2257.06	0.000822	0.900822			2257.06	0.000433	1.20043
2256.1	0.001002		2256.1	0.000868	0.300868			2256.1	0.0017	0.6017		2256.1	0.00081	0.90081			2256.1	0.000415	1.20042
2255.13	0.000997		2255.13	0.000863	0.300863			2255.13	0.001663	0.601663		2255.13	0.000797	0.900797			2255.13	0.000375	1.20037
2254.17	0.000992		2254.17	0.000858	0.300858			2254.17	0.001658	0.601658		2254.17	0.000788	0.900788			2254.17	0.000357	1.20036
2253.21	0.000987		2253.21	0.000853	0.300853			2253.21	0.001686	0.601686		2253.21	0.000805	0.900805			2253.21	0.000373	1.20037
2252.24	0.000982		2252.24	0.000848	0.300848			2252.24	0.0017	0.6017		2252.24	0.000823	0.900823			2252.24	0.000383	1.20038
2251.28	0.000977		2251.28	0.000843	0.300843			2251.28	0.001696	0.601696		2251.28	0.000814	0.900814			2251.28	0.000379	1.20038
2250.31	0.000972		2250.31	0.000838	0.300838			2250.31	0.00169	0.60169		2250.31	0.000788	0.900788			2250.31	0.000378	1.20038
2249.35	0.000968		2249.35	0.000834	0.300834			2249.35	0.001659	0.601659		2249.35	0.000762	0.900762			2249.35	0.000386	1.20039
2248.39	0.000963		2248.39	0.000829	0.300829			2248.39	0.001614	0.601614		2248.39	0.000752	0.900752			2248.39	0.000396	1.2004
2247.42	0.000958		2247.42	0.000824	0.300824			2247.42	0.001604	0.601604		2247.42	0.000767	0.900767			2247.42	0.000408	1.20041
2246.46	0.000953		2246.46	0.000819	0.300819			2246.46	0.001617	0.601617		2246.46	0.000787	0.900787			2246.46	0.000423	1.20042
2245.49	0.000948		2245.49	0.000814	0.300814			2245.49	0.001602	0.601602		2245.49	0.000787	0.900787			2245.49	0.00043	1.20043
2244.53	0.000943		2244.53	0.000809	0.300809			2244.53	0.001573	0.601573		2244.53	0.000772	0.900772			2244.53	0.000424	1.20042
2243.57	0.000938		2243.57	0.000804	0.300804			2243.57	0.001559	0.601559		2243.57	0.000759	0.900759			2243.57	0.000412	1.20041
2242.6	0.000934		2242.6	0.000799	0.300799			2242.6	0.001551	0.601551		2242.6	0.00076	0.90076			2242.6	0.000407	1.20041
2241.64	0.000929		2241.64	0.000795	0.300795			2241.64	0.001551	0.601551		2241.64	0.000764	0.900764			2241.64	0.000412	1.20041
2240.67	0.000924		2240.67	0.00079	0.30079			2240.67	0.001564	0.601564		2240.67	0.000743	0.900743			2240.67	0.00041	1.20041
2239.71	0.000919		2239.71	0.000785	0.300785			2239.71	0.001564	0.601564		2239.71	0.00072	0.90072			2239.71	0.000395	1.20039
2238.74	0.000914		2238.74	0.00078	0.30078			2238.74	0.001546	0.601546		2238.74	0.000709	0.900709			2238.74	0.000373	1.20037
2237.78	0.000909		2237.78	0.000775	0.300775			2237.78	0.001528	0.601528		2237.78	0.000685	0.900685			2237.78	0.000333	1.20033
2236.82	0.000881		2236.82	0.000734	0.300734			2236.82	0.001504	0.601504		2236.82	0.000647	0.900647			2236.82	0.000266	1.20027
2235.85	0.000848		2235.85	0.000695	0.300695			2235.85	0.001466	0.601466		2235.85	0.000614	0.900614			2235.85	0.000218	1.20022
2234.89	0.000809		2234.89	0.000661	0.300661			2234.89	0.001431	0.601431		2234.89	0.000601	0.900601			2234.89	0.00022	1.20022
2233.92	0.000778		2233.92	0.000624	0.300624			2233.92	0.001413	0.601413		2233.92	0.000601	0.900601			2233.92	0.00023	1.20023
2232.96	0.000767		2232.96	0.000597	0.300597			2232.96	0.001399	0.601399		2232.96	0.000596	0.900596			2232.96	0.000218	1.20022
2232	0.000777		2232	0.000607	0.300607			2232	0.001388	0.601388		2232	0.00058	0.90058			2232	0.00021	1.20021
2231.03	0.000784		2231.03	0.000628	0.300628			2231.03	0.001388	0.601388		2231.03	0.000573	0.900573			2231.03	0.000198	1.2002
2230.07	0.000775		2230.07	0.000613	0.300613			2230.07	0.001388	0.601388		2230.07	0.000586	0.900586			2230.07	0.000182	1.20018
2229.1	0.000759		2229.1	0.00058	0.30058			2229.1	0.001393	0.601393		2229.1	0.000597	0.900597			2229.1	0.000189	1.20019
2228.14	0.000752		2228.14	0.000565	0.300565			2228.14	0.00141	0.60141		2228.14	0.000576	0.900576			2228.14	0.000195	1.20019
2227.17	0.000749		2227.17	0.000556	0.300556			2227.17	0.001413	0.601413		2227.17	0.000545	0.900545			2227.17	0.000185	1.20019
2226.21	0.000737		2226.21	0.000539	0.300539			2226.21	0.001383	0.601383		2226.21	0.000533	0.900533			2226.21	0.000177	1.20018
2225.25	0.000718		2225.25	0.000535	0.300535			2225.25	0.001343	0.601343		2225.25	0.00053	0.90053			2225.25	0.000165	1.20016
2224.28	0.000706		2224.28	0.000539	0.300539			2224.28	0.001327	0.601327		2224.28	0.000521	0.900521			2224.28	0.000153	1.20015
2223.32	0.000712		2223.32	0.000536	0.300536			2223.32	0.001351	0.601351		2223.32	0.00051	0.90051			2223.32	0.000146	1.20015
2222.35	0.000727		2222.35	0.000535	0.300535			2222.35	0.001393	0.601393		2222.35	0.0005	0.9005			2222.35	0.000131	1.20013
2221.39	0.000734		2221.39	0.000537	0.300537			2221.39	0.001406	0.601406		2221.39	0.000485	0.900485			2221.39	0.0001	1.2001
2220.43	0.000735		2220.43	0.000532	0.300532			2220.43	0.00139	0.60139		2220.43	0.000472	0.900472			2220.43	6.8e-05	1.20007
2219.46	0.00073		2219.46	0.00052	0.30052			2219.46	0.001366	0.601366		2219.46	0.000469	0.900469			2219.46	3.7e-05	1.20004
2218.5	0.000697		2218.5	0.000494	0.300494			2218.5	0.001328	0.601328		2218.5	0.000481	0.900481			2218.5	1.8e-05	1.20002
2217.53	0.000631		2217.53	0.000453	0.300453			2217.53	0.001279	0.601279		2217.53	0.000506	0.900506			2217.53	3.3e-05	1.20003
2216.57	0.000572		2216.57	0.000413	0.300413			2216.57	0.001243	0.601243		2216.57	0.000518	0.900518			2216.57	5.1e-05	1.20005
2215.61	0.000551		2215.61	0.000398	0.300398			2215.61	0.001229	0.601229		2215.61	0.000489	0.900489			2215.61	3.3e-05	1.20003
2214.64	0.00055		2214.64	0.000395	0.300395			2214.64	0.001224	0.601224		2214.64	0.00044	0.90044			2214.64	-2e-06	1.2
2213.68	0.000545		2213.68	0.00038	0.30038			2213.68	0.001215	0.601215		2213.68	0.00041	0.90041			2213.68	-1.6e-05	1.19998
2212.71	0.000534		2212.71	0.000377	0.300377			2212.71	0.00121	0.60121		2212.71	0.000399	0.900399			2212.71	-6e-06	1.19999
2211.75	0.000508		2211.75	0.000392	0.300392			2211.75	0.001203	0.601203		2211.75	0.000379	0.900379			2211.75	5e-06	1.2
2210.78	0.000479		2210.78	0.000399	0.300399			2210.78	0.001192	0.601192		2210.78	0.000352	0.900352			2210.78	-3e-06	1.2
2209.82	0.000477		2209.82	0.000401	0.300401			2209.82	0.001193	0.601193		2209.82	0.000343	0.900343			2209.82	-1.9e-05	1.19998
2208.86	0.000488		2208.86	0.000396	0.300396			2208.86	0.001187	0.601187		2208.86	0.000348	0.900348			2208.86	-2.2e-05	1.19998
2207.89	0.000469		2207.89	0.000363	0.300363			2207.89	0.001152	0.601152		2207.89	0.000347	0.900347			2207.89	-1.3e-05	1.19999
2206.93	0.000443		2206.93	0.000326	0.300326			2206.93	0.001131	0.601131		2206.93	0.000339	0.900339			2206.93	-1.1e-05	1.19999
2205.96	0.000434		2205.96	0.000316	0.300316			2205.96	0.001144	0.601144		2205.96	0.000325	0.900325			2205.96	-2.4e-05	1.19998
2205	0.000413		2205	0.000304	0.300304			2205	0.001142	0.601142		2205	0.000312	0.900312			2205	-3.9e-05	1.19996
2204.04	0.00039		2204.04	0.000276	0.300276			2204.04	0.001111	0.601111		2204.04	0.000309	0.900309			2204.04	-5.3e-05	1.19995
2203.07	0.000396		2203.07	0.000259	0.300259			2203.07	0.001098	0.601098		2203.07	0.000308	0.900308			2203.07	-7.8e-05	1.19992
2202.11	0.000413		2202.11	0.000258	0.300258			2202.11	0.001117	0.601117		2202.11	0.000312	0.900312			2202.11	-9.9e-05	1.1999
2201.14	0.000421		2201.14	0.000274	0.300274			2201.14	0.001145	0.601145		2201.14	0.000322	0.900322			2201.14	-9.4e-05	1.19991
2200.18	0.00042		2200.18	0.00031	0.30031			2200.18	0.001175	0.601175		2200.18	0.000319	0.900319			2200.18	-7.3e-05	1.19993
2199.21	0.000412		2199.21	0.000338	0.300338			2199.21	0.001202	0.601202		2199.21	0.000312	0.900312			2199.21	-5.8e-05	1.19994
2198.25	0.000403		2198.25	0.000348	0.300348			2198.25	0.001208	0.601208		2198.25	0.000335	0.900335			2198.25	-3.5e-05	1.19996
2197.29	0.000396		2197.29	0.000349	0.300349			2197.29	0.001199	0.601199		2197.29	0.000382	0.900382			2197.29	1.1e-05	1.20001
[truncated: 1,502 more rows]

## Sheet: weight
	PE	initial weight (µg)	weight after 4 weeks (µg)	difference %			average	thickness mm (h)	short edge mm (a)	long edge mm (b)	total area mm2	difference in weight (µg)	difference in weight ( g)	d PE g/cm3	V (cm3)	V (mm3)	h (mm)	h (nm)
[truncated: 12 more rows]
